# Supplementary material
Source: MDPI journal article supplement (https://www.mdpi.com/2073-4352/14/1/23)

## Structural Analysis, Characterization and First-Principles Calculation on Bismuth Tellurium Oxides, $\text{Bi}_6\text{Te}_2\text{O}_{15}$

*Sun Woo Kim<sup>1,\*</sup>, Hong Young Chang<sup>2,\*</sup>*

1. Department of Chemistry Education, Chosun University, Gwangju 61452, South Korea

2. Department of Computer, Mathematics, and Physical Sciences (CMPS), Sul Ross State University, Alpine, TX 798832, USA

\* Correspondence: swookim@chosun.ac.kr (S.W.K.); hong.young.chang@sulross.edu (H.Y.C.)

Table S1. Atomic coordinates and equivalent isotropic displacement parameters ( $\text{\AA}^2$ ) for  $\text{Bi}_6\text{Te}_2\text{O}_{15}$ .

Table S2. Anisotropic displacement parameters ( $\text{\AA}^2 \times 10^3$ ) for  $\text{Bi}_6\text{Te}_2\text{O}_{15}$ .

Table S3. Local dipole moment calculation

Table S4. Table of the calculation for BSI (Bond Stability Index) and GII (Global Instability Index)

Figure S1. Experimental and Calculated X-ray powder diffraction patterns for  $\text{Bi}_6\text{Te}_2\text{O}_{15}$ .

Figure S2. FT-IR Spectra of  $\text{Bi}_6\text{Te}_2\text{O}_{15}$ .

Figure S3. Thermogravimetric analysis (TGA) diagram for  $\text{Bi}_6\text{Te}_2\text{O}_{15}$

Figure S4. PXRD pattern for final residuals after TGA experiment.

Figure S5. Dependence of total energy versus the unit cell volume by selected potential

Figure S6. Other optical properties

**Table S1. Atomic coordinates and equivalent isotropic displacement parameters ( $\text{\AA}^2$ ) for  $\text{Bi}_6\text{Te}_2\text{O}_{15}$ .**

| atom  | x          | y         | z          | $U_{\text{(eq)}}$ |
|-------|------------|-----------|------------|-------------------|
| Bi(1) | 0.3798(1)  | 0.5061(1) | 0.7172(1)  | 0.01985(1)        |
| Bi(2) | 0.6384(1)  | 0.7500    | 0.2767(1)  | 0.02068(1)        |
| Bi(3) | 0.3899(1)  | 0.7500    | 0.7316(1)  | 0.01973(1)        |
| Bi(4) | 0.6161(1)  | 0.3777(1) | 0.7659(1)  | 0.02154(1)        |
| Te(1) | 0.6319(1)  | 0.6280(1) | 0.7514(2)  | 0.01999(1)        |
| O(1)  | 0.5777(9)  | 0.6801(4) | 1.0138(17) | 0.02498(2)        |
| O(2)  | 0.6901(8)  | 0.5781(4) | 0.4910(15) | 0.01923(2)        |
| O(3)  | 0.5023(9)  | 0.6624(4) | 0.5422(15) | 0.02428(2)        |
| O(4)  | 0.7597(8)  | 0.5934(4) | 0.9553(16) | 0.01830(2)        |
| O(5)  | 0.5105(9)  | 0.5734(4) | 0.8916(17) | 0.03174(2)        |
| O(6)  | 0.7467(8)  | 0.6878(4) | 0.6174(16) | 0.02544(2)        |
| O(7)  | 0.5649(8)  | 0.4648(4) | 0.6506(17) | 0.01591(2)        |
| O(8)  | 0.8253(11) | 0.7500    | 0.1470(20) | 0.01687(3)        |

$U_{\text{(eq)}}$  is defined as one third of the trace of the orthogonalized  $U^{\text{ij}}$  tensor.

**Table S2. Anisotropic displacement parameters ( $\text{\AA}^2 \times 10^3$ ) for  $\text{Bi}_6\text{Te}_2\text{O}_{15}$ .**

| atom  | $U^{11}$ | $U^{22}$ | $U^{33}$ | $U^{23}$ | $U^{13}$ | $U^{12}$ |
|-------|----------|----------|----------|----------|----------|----------|
| Bi(1) | 20(1)    | 17(1)    | 18(1)    | 0(1)     | 1(1)     | -1(1)    |
| Bi(2) | 21(1)    | 16(1)    | 18(1)    | 0        | 0(1)     | 0        |
| Bi(3) | 20(1)    | 17(1)    | 18(1)    | 0        | 0(1)     | 0        |
| Bi(4) | 22(1)    | 16(1)    | 18(1)    | 0(1)     | 0(1)     | 0(1)     |
| Te(1) | 20(1)    | 14(1)    | 17(1)    | 1(1)     | 0(1)     | 0(1)     |
| O(1)  | 25(5)    | 19(5)    | 21(5)    | -4(4)    | 3(4)     | -2(4)    |
| O(2)  | 19(4)    | 27(5)    | 11(4)    | -6(4)    | -2(3)    | -1(4)    |
| O(3)  | 24(5)    | 27(5)    | 11(4)    | 0(4)     | -2(4)    | 0(4)     |
| O(4)  | 18(4)    | 21(5)    | 20(5)    | 4(4)     | -3(4)    | 5(4)     |
| O(5)  | 32(5)    | 17(5)    | 22(5)    | -1(4)    | 0(4)     | -10(4)   |
| O(6)  | 25(5)    | 20(4)    | 13(4)    | -1(4)    | -2(4)    | -4(4)    |
| O(7)  | 16(4)    | 26(5)    | 22(5)    | -2(4)    | 1(4)     | -2(4)    |
| O(8)  | 17(6)    | 24(7)    | 16(6)    | 0        | 1(5)     | 0        |

**Table S3. Local dipole moment calculation**

The local dipole moment of the square pyramidal of  $[\text{Bi}(\text{I})\text{O}_5]^{7-}$  without lone-pair electron or with lone-pair electron is calculated.

| Bi(I)O <sub>5</sub> in Bi <sub>6</sub> Te <sub>2</sub> O <sub>15</sub><br>without lone pair   |       |         | Cart. Coord.                               |        |        | Distance | Unit vector          |        |        |                    | Dipole moment<br>between two atoms |          |              |
|-----------------------------------------------------------------------------------------------|-------|---------|--------------------------------------------|--------|--------|----------|----------------------|--------|--------|--------------------|------------------------------------|----------|--------------|
| Z                                                                                             | atom  | charges | x                                          | y      | z      | Å        | x                    | y      | z      | Unitized<br>Vector | C_grav                             | C_charge | u_debye      |
| 83                                                                                            | Bi(1) | 3.029   | 4.019                                      | -0.138 | 3.862  |          |                      |        |        |                    |                                    |          |              |
| 8                                                                                             | O2    | -0.521  | 3.280                                      | 1.772  | 2.741  | 2.335    | -0.317               | 0.818  | -0.480 | 1.000              | 0.088                              | 0.096    | 8.309        |
| 8                                                                                             | O4    | -0.308  | 2.749                                      | -2.119 | 2.933  | 2.530    | -0.502               | -0.783 | -0.367 | 1.000              | 0.088                              | 0.094    | 6.645        |
| 8                                                                                             | O5    | -0.630  | 5.403                                      | -1.666 | 4.800  | 2.265    | 0.611                | -0.675 | 0.414  | 1.000              | 0.088                              | 0.097    | 9.142        |
| 8                                                                                             | O7A   | -0.819  | 4.605                                      | -0.798 | 1.881  | 2.169    | 0.270                | -0.305 | -0.913 | 1.000              | 0.088                              | 0.099    | 10.547       |
| 8                                                                                             | O7B   | -0.751  | 5.978                                      | 0.798  | 3.503  | 2.200    | 0.890                | 0.425  | -0.163 | 1.000              | 0.088                              | 0.099    | 10.046       |
|                                                                                               |       |         |                                            |        |        |          |                      |        |        |                    |                                    |          |              |
|                                                                                               |       |         | Cell Volume                                |        |        | 1293.613 |                      |        |        | Dipole Moment      |                                    |          |              |
|                                                                                               |       |         | Z                                          |        |        | 4.000    |                      |        |        | x                  | y                                  | z        | Magnitude    |
|                                                                                               |       |         | Total Dipole Moments<br>=Polarization(P) = |        |        | 0.057    | Debye/Å <sup>3</sup> |        |        | 11.406             | -3.510                             | -13.914  | 18.331 Debye |
|                                                                                               |       |         |                                            |        |        |          |                      |        |        |                    |                                    |          |              |
| Bi(I)O <sub>5</sub> (Lp) in Bi <sub>6</sub> Te <sub>2</sub> O <sub>15</sub><br>with lone pair |       |         | Cart. Coord.                               |        |        | Distance | Unit vector          |        |        |                    | Dipole moment<br>between two atoms |          |              |
| Z                                                                                             | atom  | charges | x                                          | y      | z      | Å        | x                    | y      | z      | Unitized<br>Vector | C_grav                             | C_charge | u_debye      |
| 83                                                                                            | Bi(1) | 3.029   | 0.000                                      | 0.000  | 0.000  |          |                      |        |        |                    |                                    |          |              |
| 8                                                                                             | O2    | -0.521  | 0.740                                      | -1.909 | 1.121  | 2.335    | 0.317                | -0.818 | 0.480  | 1.000              | 0.088                              | 0.096    | 8.309        |
| 8                                                                                             | O4    | -0.308  | 1.271                                      | 1.981  | 0.929  | 2.530    | 0.502                | 0.783  | 0.367  | 1.000              | 0.088                              | 0.094    | 6.645        |
| 8                                                                                             | O5    | -0.630  | -1.384                                     | 1.528  | -0.938 | 2.265    | -0.611               | 0.675  | -0.414 | 1.000              | 0.088                              | 0.097    | 9.142        |
| 8                                                                                             | O7A   | -0.819  | -0.586                                     | 0.660  | 1.981  | 2.169    | -0.270               | 0.305  | 0.913  | 1.000              | 0.088                              | 0.099    | 10.547       |
| 8                                                                                             | O7B   | -0.751  | -1.958                                     | -0.936 | 0.359  | 2.200    | -0.890               | -0.425 | 0.163  | 1.000              | 0.088                              | 0.099    | 10.046       |
| 2                                                                                             | LP    | -2.000  | 0.451                                      | -0.311 | -0.812 | 0.980    | 0.460                | -0.318 | -0.829 | 1.000              | 0.024                              | 0.048    | 9.524        |
|                                                                                               |       |         | -4.248                                     |        |        |          |                      |        |        |                    |                                    |          |              |
|                                                                                               |       |         | Cell Volume                                |        |        | 1293.613 |                      |        |        | Dipole Moment      |                                    |          |              |
|                                                                                               |       |         | Z                                          |        |        | 4.000    |                      |        |        | x                  | y                                  | z        | Magnitude    |
|                                                                                               |       |         | Total Dipole Moments<br>=Polarization(P) = |        |        | 0.029    | Debye/Å <sup>3</sup> |        |        | -7.020             | 0.484                              | 6.021    | 9.261 Debye  |

The local dipole moment of the square pyramidal of  $[\text{Bi}(2)\text{O}_5]^{7-}$  without lone-pair electron or with lone-pair electron is calculated.

| Bi(2)O <sub>5</sub> in Bi <sub>6</sub> Te <sub>2</sub> O <sub>15</sub><br>without lone pair   |       |         | Cart. Coord.                               |         |          | Distance | Unit vector          |         |        |                    | Dipole moment<br>between two atoms |          |           |
|-----------------------------------------------------------------------------------------------|-------|---------|--------------------------------------------|---------|----------|----------|----------------------|---------|--------|--------------------|------------------------------------|----------|-----------|
| Z                                                                                             | atom  | charges | x                                          | y       | z        | Å        | x                    | y       | z      | Unitized<br>Vector | C_grav                             | C_charge | u_debye   |
| 83                                                                                            | Bi(2) | 2.942   | 3.82678                                    | 5.6735  | -6.8742  |          |                      |         |        |                    |                                    |          |           |
| 8                                                                                             | O1A   | -0.709  | 4.46908                                    | 4.08735 | -5.45836 | 2.221    | 0.289                | -0.714  | 0.637  | 1.000              | 0.088                              | 0.098    | 9.651     |
| 8                                                                                             | O1B   | -0.709  | 4.46908                                    | 7.25965 | -5.45836 | 2.221    | 0.289                | 0.714   | 0.637  | 1.000              | 0.088                              | 0.098    | 9.651     |
| 8                                                                                             | O6A   | -0.267  | 2.68091                                    | 4.2613  | -8.70858 | 2.583    | -0.444               | -0.547  | -0.710 | 1.000              | 0.088                              | 0.094    | 6.226     |
| 8                                                                                             | O6B   | -0.267  | 2.68091                                    | 7.0857  | -8.70858 | 2.583    | -0.444               | 0.547   | -0.710 | 1.000              | 0.088                              | 0.094    | 6.226     |
| 8                                                                                             | O8    | -0.989  | 1.84904                                    | 5.6735  | -6.17416 | 2.098    | -0.943               | 0.000   | 0.334  | 1.000              | 0.088                              | 0.101    | 11.689    |
|                                                                                               |       |         |                                            |         |          |          |                      |         |        |                    |                                    |          |           |
|                                                                                               |       |         | Cell Volume                                |         |          | 1293.613 |                      |         |        | Dipole Moment      |                                    |          |           |
|                                                                                               |       |         | Z                                          |         |          | 4.000    |                      |         |        | x                  | y                                  | z        | Magnitude |
|                                                                                               |       |         | Total Dipole Moments<br>=Polarization(P) = |         |          | 0.041    | Debye/Å <sup>3</sup> | -10.960 | 0.000  | 7.362              | 13.203                             | Debye    |           |
|                                                                                               |       |         |                                            |         |          |          |                      |         |        |                    |                                    |          |           |
| Bi(2)O <sub>5</sub> (Lp) in Bi <sub>6</sub> Te <sub>2</sub> O <sub>15</sub><br>with lone pair |       |         | Cart. Coord.                               |         |          | Distance | Unit vector          |         |        |                    | Dipole moment<br>between two atoms |          |           |
| Z                                                                                             | atom  | charges | x                                          | y       | z        | Å        | x                    | y       | z      | Unitized<br>Vector | C_grav                             | C_charge | u_debye   |
| 83                                                                                            | Bi(2) | 2.942   | 0.000                                      | 0.000   | 0.000    |          |                      |         |        |                    |                                    |          |           |
| 8                                                                                             | O1A   | -0.709  | -0.642                                     | 1.586   | -1.416   | 2.221    | -0.289               | 0.714   | -0.637 | 1.000              | 0.088                              | 0.098    | 9.651     |
| 8                                                                                             | O1B   | -0.709  | -0.642                                     | -1.586  | -1.416   | 2.221    | -0.289               | -0.714  | -0.637 | 1.000              | 0.088                              | 0.098    | 9.651     |
| 8                                                                                             | O6A   | -0.267  | 1.146                                      | 1.412   | 1.834    | 2.583    | 0.444                | 0.547   | 0.710  | 1.000              | 0.088                              | 0.094    | 6.226     |
| 8                                                                                             | O6B   | -0.267  | 1.146                                      | -1.412  | 1.834    | 2.583    | 0.444                | -0.547  | 0.710  | 1.000              | 0.088                              | 0.094    | 6.226     |
| 8                                                                                             | O8    | -0.989  | 1.978                                      | 0.000   | -0.700   | 2.098    | 0.943                | 0.000   | -0.334 | 1.000              | 0.088                              | 0.101    | 11.689    |
| 2                                                                                             | LP    | -2.000  | -0.979                                     | 0.000   | -0.045   | 0.980    | -0.999               | 0.000   | -0.046 | 1.000              | 0.024                              | 0.048    | 9.509     |
|                                                                                               |       |         | -3.050                                     |         |          |          |                      |         |        |                    |                                    |          |           |
|                                                                                               |       |         | Cell Volume                                |         |          | 1293.613 |                      |         |        | Dipole Moment      |                                    |          |           |
|                                                                                               |       |         | Z                                          |         |          | 4.000    |                      |         |        | x                  | y                                  | z        | Magnitude |
|                                                                                               |       |         | Total Dipole Moments<br>=Polarization(P) = |         |          | 0.025    | Debye/Å <sup>3</sup> | 1.461   | 0.000  | -7.798             | 7.934                              | Debye    |           |

The local dipole moment of the square pyramidal of  $[\text{Bi}(3)\text{O}_5]^{7-}$  without lone-pair electron or with lone-pair electron is calculated.

| Bi(3)O <sub>5</sub> in Bi <sub>6</sub> Te <sub>2</sub> O <sub>15</sub><br>without lone pair |       |         | Cart. Coord.                               |        |        | Distance | Unit vector          |        |        |                    | Dipole moment<br>between two atoms |          |              |
|---------------------------------------------------------------------------------------------|-------|---------|--------------------------------------------|--------|--------|----------|----------------------|--------|--------|--------------------|------------------------------------|----------|--------------|
| Z                                                                                           | atom  | charges | x                                          | y      | z      | Å        | x                    | y      | z      | Unitized<br>Vector | C_grav                             | C_charge | u_debye      |
| 83                                                                                          | Bi(3) | 2.878   | 1.165                                      | 5.674  | -4.138 |          |                      |        |        |                    |                                    |          |              |
| 8                                                                                           | O3A   | -0.709  | -0.024                                     | 7.662  | -5.157 | 2.531    | -0.470               | 0.786  | -0.403 | 1.000              | 0.088                              | 0.098    | 10.931       |
| 8                                                                                           | O3B   | -0.709  | -0.024                                     | 3.685  | -5.157 | 2.531    | -0.470               | -0.786 | -0.403 | 1.000              | 0.088                              | 0.098    | 10.931       |
| 8                                                                                           | O6A   | -0.267  | 2.681                                      | 4.261  | -3.324 | 2.226    | 0.681                | -0.634 | 0.365  | 1.000              | 0.088                              | 0.094    | 5.305        |
| 8                                                                                           | O6B   | -0.267  | 2.681                                      | 7.086  | -3.324 | 2.226    | 0.681                | 0.634  | 0.365  | 1.000              | 0.088                              | 0.094    | 5.305        |
| 8                                                                                           | O8    | -0.989  | 1.849                                      | 5.674  | -6.174 | 2.148    | 0.318                | 0.000  | -0.948 | 1.000              | 0.088                              | 0.101    | 11.912       |
|                                                                                             |       |         |                                            |        |        |          |                      |        |        |                    |                                    |          |              |
|                                                                                             |       |         | Cell Volume                                |        |        | 1293.613 |                      |        |        | Dipole Moment      |                                    |          |              |
|                                                                                             |       |         | Z                                          |        |        | 4.000    |                      |        |        | x                  | y                                  | z        | Magnitude    |
|                                                                                             |       |         | Total Dipole Moments<br>=Polarization(P) = |        |        | 0.050    | Debye/Å <sup>3</sup> |        |        | 0.751              | 0.000                              | -16.223  | 16.240 Debye |
|                                                                                             |       |         |                                            |        |        |          |                      |        |        |                    |                                    |          |              |
| Bi(3)O <sub>5</sub> in Bi <sub>6</sub> Te <sub>2</sub> O <sub>15</sub><br>with lone pair    |       |         | Cart. Coord.                               |        |        | Distance | Unit vector          |        |        |                    | Dipole moment<br>between two atoms |          |              |
| Z                                                                                           | atom  | charges | x                                          | y      | z      | Å        | x                    | y      | z      | Unitized<br>Vector | C_grav                             | C_charge | u_debye      |
| 83                                                                                          | Bi(3) | 2.878   | 0.000                                      | 0.000  | 0.000  |          |                      |        |        |                    |                                    |          |              |
| 8                                                                                           | O3A   | -0.709  | 1.189                                      | -1.988 | 1.020  | 2.531    | 0.470                | -0.786 | 0.403  | 1.000              | 0.088                              | 0.098    | 10.931       |
| 8                                                                                           | O3B   | -0.709  | 1.189                                      | 1.988  | 1.020  | 2.531    | 0.470                | 0.786  | 0.403  | 1.000              | 0.088                              | 0.098    | 10.931       |
| 8                                                                                           | O6A   | -0.267  | -1.516                                     | 1.412  | -0.813 | 2.226    | -0.681               | 0.634  | -0.365 | 1.000              | 0.088                              | 0.094    | 5.305        |
| 8                                                                                           | O6B   | -0.267  | -1.516                                     | -1.412 | -0.813 | 2.226    | -0.681               | -0.634 | -0.365 | 1.000              | 0.088                              | 0.094    | 5.305        |
| 8                                                                                           | O8    | -0.989  | -0.684                                     | 0.000  | 2.037  | 2.148    | -0.318               | 0.000  | 0.948  | 1.000              | 0.088                              | 0.101    | 11.912       |
| 2                                                                                           | LP    | -2.000  | 0.470                                      | 0.000  | -0.860 | 0.980    | 0.479                | 0.000  | -0.878 | 1.000              | 0.024                              | 0.048    | 9.510        |
|                                                                                             |       |         | -2.847                                     |        |        |          |                      |        |        |                    |                                    |          |              |
|                                                                                             |       |         | Cell Volume                                |        |        | 1293.613 |                      |        |        | Dipole Moment      |                                    |          |              |
|                                                                                             |       |         | Z                                          |        |        | 4.000    |                      |        |        | x                  | y                                  | z        | Magnitude    |
|                                                                                             |       |         | Total Dipole Moments<br>=Polarization(P) = |        |        | 0.027    | Debye/Å <sup>3</sup> |        |        | 3.808              | 0.000                              | 7.877    | 8.750 Debye  |

The local dipole moment of the square pyramidal of  $[\text{Bi}(4)\text{O}_5]^{7-}$  without lone-pair electron or with lone-pair electron is calculated.

| Bi(4)O <sub>5</sub> in Bi <sub>6</sub> Te <sub>2</sub> O <sub>15</sub><br>without lone pair |       |         | Cart. Coord.                               |        |        | Distance | Unit vector          |        |        |                    | Dipole moment<br>between two atoms |          |              |
|---------------------------------------------------------------------------------------------|-------|---------|--------------------------------------------|--------|--------|----------|----------------------|--------|--------|--------------------|------------------------------------|----------|--------------|
| Z                                                                                           | atom  | charges | x                                          | y      | z      | Å        | x                    | y      | z      | Unitized<br>Vector | C_grav                             | C_charge | u_debye      |
| 83                                                                                          | Bi(4) | 2.770   | 1.229                                      | 2.775  | 3.953  |          |                      |        |        |                    |                                    |          |              |
| 8                                                                                           | O2    | -0.709  | 3.280                                      | 1.772  | 2.741  | 2.585    | 0.793                | -0.388 | -0.469 | 1.000              | 0.088                              | 0.098    | 11.045       |
| 8                                                                                           | O3    | -0.709  | -0.024                                     | 3.685  | 5.611  | 2.269    | -0.552               | 0.401  | 0.731  | 1.000              | 0.088                              | 0.098    | 9.695        |
| 8                                                                                           | O4    | -0.267  | 2.543                                      | 2.119  | 5.625  | 2.226    | 0.590                | -0.295 | 0.751  | 1.000              | 0.088                              | 0.093    | 5.203        |
| 8                                                                                           | O5    | -0.267  | -0.112                                     | 1.666  | 2.108  | 2.536    | -0.529               | -0.437 | -0.727 | 1.000              | 0.088                              | 0.093    | 5.927        |
| 8                                                                                           | O7    | -0.989  | 0.686                                      | 0.798  | 4.573  | 2.142    | -0.253               | -0.923 | 0.290  | 1.000              | 0.088                              | 0.101    | 11.776       |
|                                                                                             |       |         | Cell Volume                                |        |        | 1293.613 |                      |        |        | Dipole Moment      |                                    |          |              |
|                                                                                             |       |         | Z                                          |        |        | 4.000    |                      |        |        | x                  | y                                  | z        | Magnitude    |
|                                                                                             |       |         | Total Dipole Moments=                      |        |        | 0.050    | Debye/Å <sup>3</sup> |        |        | 0.364              | -15.394                            | 4.918    | 16.165 Debye |
|                                                                                             |       |         | Polarization(P) =                          |        |        |          |                      |        |        |                    |                                    |          |              |
| Bi(4)O <sub>5</sub> in Bi <sub>6</sub> Te <sub>2</sub> O <sub>15</sub><br>with lone pair    |       |         | Cart. Coord.                               |        |        | Distance | Unit vector          |        |        |                    | Dipole moment<br>between two atoms |          |              |
| Z                                                                                           | atom  | charges | x                                          | y      | z      | Å        | x                    | y      | z      | Unitized<br>Vector | C_grav                             | C_charge | u_debye      |
| 83                                                                                          | Bi(4) | 2.770   | 0.000                                      | 0.000  | 0.000  |          |                      |        |        |                    |                                    |          |              |
| 8                                                                                           | O2    | -0.709  | -2.051                                     | 1.003  | 1.212  | 2.585    | -0.793               | 0.388  | 0.469  | 1.000              | 0.088                              | 0.098    | 11.045       |
| 8                                                                                           | O3    | -0.709  | 1.253                                      | -0.910 | -1.659 | 2.269    | 0.552                | -0.401 | -0.731 | 1.000              | 0.088                              | 0.098    | 9.695        |
| 8                                                                                           | O4    | -0.267  | -1.314                                     | 0.656  | -1.672 | 2.226    | -0.590               | 0.295  | -0.751 | 1.000              | 0.088                              | 0.093    | 5.203        |
| 8                                                                                           | O5    | -0.267  | 1.340                                      | 1.109  | 1.845  | 2.536    | 0.529                | 0.437  | 0.727  | 1.000              | 0.088                              | 0.093    | 5.927        |
| 8                                                                                           | O7    | -0.989  | 0.543                                      | 1.977  | -0.621 | 2.142    | 0.253                | 0.923  | -0.290 | 1.000              | 0.088                              | 0.101    | 11.776       |
| 2                                                                                           | LP    | -2.000  | 0.057                                      | -0.953 | 0.222  | 0.980    | 0.058                | -0.972 | 0.227  | 1.000              | 0.024                              | 0.047    | 9.495        |
|                                                                                             |       |         | -4.025                                     |        |        |          |                      |        |        |                    |                                    |          |              |
|                                                                                             |       |         | Cell Volume                                |        |        | 1293.613 |                      |        |        | Dipole Moment      |                                    |          |              |
|                                                                                             |       |         | Z                                          |        |        | 4.000    |                      |        |        | x                  | y                                  | z        | Magnitude    |
|                                                                                             |       |         | Total Dipole Moments<br>=Polarization(P) = |        |        | 0.021    | Debye/Å <sup>3</sup> |        |        | 0.187              | 6.163                              | -2.764   | 6.757 Debye  |

The local dipole moment of the octahedral of [Te(1)O<sub>6</sub>]<sup>6-</sup> is also calculated.

| Te(1)O <sub>6</sub> in Bi <sub>6</sub> Te <sub>2</sub> O <sub>15</sub> |      |         | Cart. Coord.                               |       |        | Distance | Unit vector          |        |        |                 | Dipole moment between two ato |          |         |
|------------------------------------------------------------------------|------|---------|--------------------------------------------|-------|--------|----------|----------------------|--------|--------|-----------------|-------------------------------|----------|---------|
| Z                                                                      | atom | charges | x                                          | y     | z      | Å        | x                    | y      | z      | Unitized Vector | C_grav                        | C_charge | u_debye |
| 52                                                                     | Te   | 5.797   | -1.395                                     | 2.906 | -4.031 |          |                      |        |        |                 |                               |          |         |
| 8                                                                      | O1   | -0.968  | -0.822                                     | 4.087 | -2.618 | 1.929    | 0.297                | 0.613  | 0.732  | 1.000           | 0.133                         | 0.163    | 14.922  |
| 8                                                                      | O2   | -1.030  | -2.012                                     | 1.772 | -5.433 | 1.906    | -0.323               | -0.595 | -0.736 | 1.000           | 0.133                         | 0.163    | 15.236  |
| 8                                                                      | O3   | -0.945  | -0.024                                     | 3.685 | -5.157 | 1.938    | 0.708                | 0.402  | -0.581 | 1.000           | 0.133                         | 0.162    | 14.811  |
| 8                                                                      | O4   | -1.014  | -2.749                                     | 2.119 | -2.933 | 1.912    | -0.708               | -0.412 | 0.574  | 1.000           | 0.133                         | 0.163    | 15.159  |
| 8                                                                      | O5   | -0.945  | -0.112                                     | 1.666 | -3.276 | 1.938    | 0.662                | -0.640 | 0.389  | 1.000           | 0.133                         | 0.162    | 14.806  |
| 8                                                                      | O6   | -0.895  | -2.611                                     | 4.261 | -4.752 | 1.958    | -0.621               | 0.692  | -0.368 | 1.000           | 0.133                         | 0.161    | 14.558  |
|                                                                        |      |         | Cell Volume                                |       |        | 1293.613 | Dipole Moment        |        |        |                 | Magnitude                     |          |         |
|                                                                        |      |         | Z                                          |       |        | 4.000    |                      |        |        |                 |                               |          |         |
|                                                                        |      |         | Total Dipole Moments<br>=Polarization(P) = |       |        | 0.001    | Debye/Å <sup>3</sup> | 0.030  | 0.392  | 0.219           | 0.450                         | Debye    |         |

Table S4. Table of the calculation for BSI (Bond Stability Index) and GII (Global Instability Index)

| BSI = 0.172<br>GII = 0.279                                                                                                                                                                                                                                                                                                                                                                                                                                                                                                                                                                                                                                                                                                                                                                                                                                                                                                                                                                                                                                                                                                                                                                                                                                                                                                                                                                                                                                                                                                                                                                                                                                                                                                                                                                                                                                                                                                                                                                                                                                                                                                                                                                                                                                                                                                                                                                                                                                                                                                                                                                                                                                                                                                                                                                                                                                                                                                                                                                                                                                                                                                                                                                                                                                                                                                                                                                                                                                                                                                                                                                                                                                                                                                                                                                                                                                                                                                                                                                                                                                                                                                                                                                                                                                                                                                                                                                                                                                                                                                                                                                                                                                                                                                                                                                                                                                                                                                                                                                                                                                                                                                                                                                                                                                                                                                                                                                                                                                                                                                                                                                                                                                                                                                                                                                                                                                                                                                                                                                                                                                                                                                                                                                                                                                                                                                                                                                                                                                                                                                                                                                                                                                                                                                                                                                                                                                                                                                                                                                                                                                                                                                                                                                                                                                                                                                                                                                                                                                                                                                                                                                                                                                                                                                                                                                                                                                                                                                                                                                                                                                                                                                                                                                                                                                                                                                                                                                                                                                                                                                                                                                                                                                                                                                                                                                                                                                                                                                                                                                                                                                                                                                                                                                                                                                                                                                                                                                                                                                                                                                                                                                                                                                                                                                                                                                                        |  | Bi(1) |   | Bi(2) | Bi(3) | Bi(4) |   | Te(1) |   | $\sum_i (S_{ij}-s_{ij})^2$ | $V_i=\sum_j S_{ij}$<br>$z_i=\sum_j s_{ij}$ | $V_i-z_i$ | $(V_i-z_i)^2$ |
|-------------------------------------------------------------------------------------------------------------------------------------------------------------------------------------------------------------------------------------------------------------------------------------------------------------------------------------------------------------------------------------------------------------------------------------------------------------------------------------------------------------------------------------------------------------------------------------------------------------------------------------------------------------------------------------------------------------------------------------------------------------------------------------------------------------------------------------------------------------------------------------------------------------------------------------------------------------------------------------------------------------------------------------------------------------------------------------------------------------------------------------------------------------------------------------------------------------------------------------------------------------------------------------------------------------------------------------------------------------------------------------------------------------------------------------------------------------------------------------------------------------------------------------------------------------------------------------------------------------------------------------------------------------------------------------------------------------------------------------------------------------------------------------------------------------------------------------------------------------------------------------------------------------------------------------------------------------------------------------------------------------------------------------------------------------------------------------------------------------------------------------------------------------------------------------------------------------------------------------------------------------------------------------------------------------------------------------------------------------------------------------------------------------------------------------------------------------------------------------------------------------------------------------------------------------------------------------------------------------------------------------------------------------------------------------------------------------------------------------------------------------------------------------------------------------------------------------------------------------------------------------------------------------------------------------------------------------------------------------------------------------------------------------------------------------------------------------------------------------------------------------------------------------------------------------------------------------------------------------------------------------------------------------------------------------------------------------------------------------------------------------------------------------------------------------------------------------------------------------------------------------------------------------------------------------------------------------------------------------------------------------------------------------------------------------------------------------------------------------------------------------------------------------------------------------------------------------------------------------------------------------------------------------------------------------------------------------------------------------------------------------------------------------------------------------------------------------------------------------------------------------------------------------------------------------------------------------------------------------------------------------------------------------------------------------------------------------------------------------------------------------------------------------------------------------------------------------------------------------------------------------------------------------------------------------------------------------------------------------------------------------------------------------------------------------------------------------------------------------------------------------------------------------------------------------------------------------------------------------------------------------------------------------------------------------------------------------------------------------------------------------------------------------------------------------------------------------------------------------------------------------------------------------------------------------------------------------------------------------------------------------------------------------------------------------------------------------------------------------------------------------------------------------------------------------------------------------------------------------------------------------------------------------------------------------------------------------------------------------------------------------------------------------------------------------------------------------------------------------------------------------------------------------------------------------------------------------------------------------------------------------------------------------------------------------------------------------------------------------------------------------------------------------------------------------------------------------------------------------------------------------------------------------------------------------------------------------------------------------------------------------------------------------------------------------------------------------------------------------------------------------------------------------------------------------------------------------------------------------------------------------------------------------------------------------------------------------------------------------------------------------------------------------------------------------------------------------------------------------------------------------------------------------------------------------------------------------------------------------------------------------------------------------------------------------------------------------------------------------------------------------------------------------------------------------------------------------------------------------------------------------------------------------------------------------------------------------------------------------------------------------------------------------------------------------------------------------------------------------------------------------------------------------------------------------------------------------------------------------------------------------------------------------------------------------------------------------------------------------------------------------------------------------------------------------------------------------------------------------------------------------------------------------------------------------------------------------------------------------------------------------------------------------------------------------------------------------------------------------------------------------------------------------------------------------------------------------------------------------------------------------------------------------------------------------------------------------------------------------------------------------------------------------------------------------------------------------------------------------------------------------------------------------------------------------------------------------------------------------------------------------------------------------------------------------------------------------------------------------------------------------------------------------------------------------------------------------------------------------------------------------------------------------------------------------------------------------------------------------------------------------------------------------------------------------------------------------------------------------------------------------------------------------------------------------------------------------------------------------------------------------------------------------------------------------------------------------------------------------------------------------------------------------------------------------------------------------------------------------------------------------------------------------------------------------------------------------------------------------------------------------------------------------------------------------------------------------------------------------------------------------------------------------------------------------------------------------------------------------------------------------------------------------------------------------------|--|-------|---|-------|-------|-------|---|-------|---|----------------------------|--------------------------------------------|-----------|---------------|
|                                                                                                                                                                                                                                                                                                                                                                                                                                                                                                                                                                                                                                                                                                                                                                                                                                                                                                                                                                                                                                                                                                                                                                                                                                                                                                                                                                                                                                                                                                                                                                                                                                                                                                                                                                                                                                                                                                                                                                                                                                                                                                                                                                                                                                                                                                                                                                                                                                                                                                                                                                                                                                                                                                                                                                                                                                                                                                                                                                                                                                                                                                                                                                                                                                                                                                                                                                                                                                                                                                                                                                                                                                                                                                                                                                                                                                                                                                                                                                                                                                                                                                                                                                                                                                                                                                                                                                                                                                                                                                                                                                                                                                                                                                                                                                                                                                                                                                                                                                                                                                                                                                                                                                                                                                                                                                                                                                                                                                                                                                                                                                                                                                                                                                                                                                                                                                                                                                                                                                                                                                                                                                                                                                                                                                                                                                                                                                                                                                                                                                                                                                                                                                                                                                                                                                                                                                                                                                                                                                                                                                                                                                                                                                                                                                                                                                                                                                                                                                                                                                                                                                                                                                                                                                                                                                                                                                                                                                                                                                                                                                                                                                                                                                                                                                                                                                                                                                                                                                                                                                                                                                                                                                                                                                                                                                                                                                                                                                                                                                                                                                                                                                                                                                                                                                                                                                                                                                                                                                                                                                                                                                                                                                                                                                                                                                                                                   |  | 1     | 1 | 1     | 1     | 1     | 1 | 1     | 1 |                            |                                            |           |               |
| O(1)<br><br><br><br><br><br><br><br><br><br><br><br><br><br><br><br><br><br><br><br><br><br><br><br><br><br><br><br><br><br><br><br><br><br><br><br><br><br><br><br><br><br><br><br><br><br><br><br><br><br><br><br><br><br><br><br><br><br><br><br><br><br><br><br><br><br><br><br><br><br><br><br><br><br><br><br><br><br><br><br><br><br><br><br><br><br><br><br><br><br><br><br><br><br><br><br><br><br><br><br><br><br><br><br><br><br><br><br><br><br><br><br><br><br><br><br><br><br><br><br><br><br><br><br><br><br><br><br><br><br><br><br><br><br><br><br><br><br><br><br><br><br><br><br><br><br><br><br><br><br><br><br><br><br><br><br><br><br><br><br><br><br><br><br><br><br><br><br><br><br><br><br><br><br><br><br><br><br><br><br><br><br><br><br><br><br><br><br><br><br><br><br><br><br><br><br><br><br><br><br><br><br><br><br><br><br><br><br><br><br><br><br><br><br><br><br><br><br><br><br><br><br><br><br><br><br><br><br><br><br><br><br><br><br><br><br><br><br><br><br><br><br><br><br><br><br><br><br><br><br><br><br><br><br><br><br><br><br><br><br><br><br><br><br><br><br><br><br><br><br><br><br><br><br><br><br><br><br><br><br><br><br><br><br><br><br><br><br><br><br><br><br><br><br><br><br><br><br><br><br><br><br><br><br><br><br><br><br><br><br><br><br><br><br><br><br><br><br><br><br><br><br><br><br><br><br><br><br><br><br><br><br><br><br><br><br><br><br><br><br><br><br><br><br><br><br><br><br><br><br><br><br><br><br><br><br><br><br><br><br><br><br><br><br><br><br><br><br><br><br><br><br><br><br><br><br><br><br><br><br><br><br><br><br><br><br><br><br><br><br><br><br><br><br><br><br><br><br><br><br><br><br><br><br><br><br><br><br><br><br><br><br><br><br><br><br><br><br><br><br><br><br><br><br><br><br><br><br><br><br><br><br><br><br><br><br><br><br><br><br><br><br><br><br><br><br><br><br><br><br><br><br><br><br><br><br><br><br><br><br><br><br><br><br><br><br><br><br><br><br><br><br><br><br><br><br><br><br><br><br><br><br><br><br><br><br><br><br><br><br><br><br><br><br><br><br><br><br><br><br><br><br><br><br><br><br><br><br><br><br><br><br><br><br><br><br><br><br><br><br><br><br><br><br><br><br><br><br><br><br><br><br><br><br><br><br><br><br><br><br><br><br><br><br><br><br><br><br><br><br><br><br><br><br><br><br><br><br><br><br><br><br><br><br><br><br><br><br><br><br><br><br><br><br><br><br><br><br><br><br><br><br><br><br><br><br><br><br><br><br><br><br><br><br><br><br><br><br><br><br><br><br><br><br><br><br><br><br><br><br><br><br><br><br><br><br><br><br><br><br><br><br><br><br><br><br><br><br><br><br><br><br><br><br><br><br><br><br><br><br><br><br><br><br><br><br><br><br><br><br><br><br><br><br><br><br><br><br><br><br><br><br><br><br><br><br><br><br><br><br><br><br><br><br><br><br><br><br><br><br><br><br><br><br><br><br><br><br><br><br><br><br><br><br><br><br><br><br><br><br><br><br><br><br><br><br><br><br><br><br><br><br><br><br><br><br><br><br><br><br><br><br><br><br><br><br><br><br><br><br><br><br><br><br><br><br><br><br><br><br><br><br><br><br><br><br><br><br><br><br><br><br><br><br><br><br><br><br><br><br><br><br><br><br><br><br><br><br><br><br><br><br><br><br><br><br><br><br><br><br><br><br><br><br><br><br><br><br><br><br><br><br><br><br><br><br><br><br><br><br><br><br><br><br><br><br><br><br><br><br><br><br><br><br><br><br><br><br><br><br><br><br><br><br><br><br><br><br><br><br><br><br><br><br><br><br><br><br><br><br><br><br><br><br><br><br><br><br><br><br><br><br><br><br><br><br><br><br><br><br><br><br><br><br><br><br><br><br><br><br><br><br><br><br><br><br><br><br><br><br><br><br><br><br><br><br><br><br><br><br><br><br><br><br><br><br><br><br><br><br><br><br><br><br><br><br><br><br><br><br><br><br><br><br><br><br><br><br><br><br><br><br><br><br><br><br><br><br><br><br><br><br><br><br><br><br><br><br><br><br><br><br><br><br><br><br><br><br><br><br><br><br><br><br><br><br><br><br><br><br><br><br><br><br><br><br><br><br><br><br><br><br><br><br><br><br><br><br><br><br><br><br><br><br><br><br><br><br><br><br><br><br><br><br><br><br><br><br><br><br><br><br><br><br><br><br><br><br><br><br><br><br><br><br><br><br><br><br><br><br><br><br><br><br><br><br><br><br><br><br><br><br><br><br><br><br><br><br><br><br><br><br><br><br><br><br><br><br><br><br><br><br><br><br><br><br><br><br><br><br><br><br><br><br><br><br><br><br><br><br><br><br><br><br><br><br><br><br><br><br><br><br><br><br><br><br><br><br><br><br><br><br><br><br><br><br><br><br><br><br><br><br><br><br><br><br><br><br><br><br><br><br><br><br><br><br><br><br><br><br><br><br><br><br><br><br><br><br><br><br><br><br><br><br><br><br><br><br><br><br><br><br><br><br><br><br><br><br><br><br><br><br><br><br><br><br><br><br><br><br><br><br><br><br><br><br><br><br><br><br><br><br><br><br><br><br><br><br><br><br><br><br><br><br><br><br><br><br><br><br><br><br><br><br><br><br><br><br><br><br><br><br><br><br><br><br><br><br><br><br><br><br><br><br><br><br><br><br><br><br><br><br><br><br><br><br><br><br><br><br><br><br><br><br><br><br><br><br><br><br><br><br><br><br><br><br><br><br><br><br><br><br><br><br><br><br><br><br><br><br><br><br><br><br><br><br><br><br><br><br><br><br><br><br><br><br><br><br><br><br><br><br><br><br><br><br><br><br><br><br><br><br><br><br><br><br><br><br><br><br><br><br><br><br><br><br><br><br><br><br><br><br><br><br><br><br><br><br><br><br><br><br><br><br><br><br><br><br><br><br><br><br><br><br><br><br><br><br><br><br><br><br><br><br><br><br><br><br><br><br><br><br><br><br><br><br><br><br><br><br><br><br><br><br><br><br><br><br><br><br><br><br><br><br><br><br><br><br><br><br><br><br><br><br><br><br><br><br><br><br><br><br><br><br><br><br><br><br><br><br><br><br><br><br><br><br><br><br><br><br><br><br><br><br><br><br><br><br><br><br><br><br><br><br><br><br><br><br><br><br><br><br><br><br><br><br><br><br><br><br><br><br><br><br><br><br><br><br><br><br><br><br><br><br><br><br><br><br><br><br><br><br><br><br><br><br><br><br><br><br><br><br><br><br><br><br><br><br><br><br><br><br><br><br><br><br><br><br><br><br><br><br><br><br><br><br><br><br><br><br><br><br><br><br><br><br><br><br><br><br><br><br><br><br><br><br><br><br><br><br><br><br><br><br><br><br><br><br><br><br><br><br><br><br><br><br><br><br><br><br><br><br><br><br><br><br><br><br><br><br><br><br><br><br><br><br><br><br><br><br><br><br><br><br><br><br><br><br><br><br><br><br><br><br><br><br><br><br><br><br><br><br><br><br><br><br><br><br><br><br><br><br><br><br><br><br><br><br><br><br><br><br><br><br><br><br><br><br><br><br><br><br><br><br><br><br><br><br><br><br><br><br><br><br><br><br><br><br><br><br><br><br><br><br><br><br><br><br><br><br><br><br><br><br><br><br><br><br><br><br><br><br><br><br><br><br><br><br><br><br><br><br><br><br><br><br><br><br><br><br><br><br><br><br><br><br><br><br><br><br><br><br><br><br><br><br><br><br><br><br><br><br><br><br><br><br><br><br><br><br><br><br><br><br><br><br><br><br><br><br><br><br><br><br><br><br><br><br><br><br><br><br><br><br><br><br><br><br><br><br><br><br><br><br><br><br><br><br><br><br><br><br><br><br><br><br><br><br><br><br><br><br><br><br><br><br><br><br><br><br><br><br><br><br><br><br><br><br><br><br><br><br><br><br><br><br><br><br><br><br><br><br><br><br><br><br><br><br><br><br><br><br><br><br><br><br><br><br><br><br><br><br><br><br><br><br><br><br><br><br><br><br><br><br><br><br><br><br><br><br><br><br><br><br><br><br><br><br><br><br><br><br><br><br><br><br><br><br><br><br><br><br><br><br><br><br><br><br><br><br><br><br><br><br><br><br><br><br><br><br><br><br><br><br><br><br><br><br><br><br><br><br><br><br><br><br><br><br><br><br><br><br><br><br><br><br><br><br><br><br><br><br><br><br><br><br><br><br><br><br><br><br><br><br><br><br><br><br><br><br><br><br><br><br><br><br><br><br><br><br><br><br><br><br><br><br><br><br><br><br><br><br><br><br><br><br><br><br><br><br><br><br><br><br><br><br><br><br><br><br><br><br><br><br><br><br><br><br><br><br><br><br><br><br><br><br><br><br><br><br><br><br><br><br><br><br><br><br><br><br><br><br><br><br><br><br><br><br><br><br><br><br><br><br><br><br><br><br><br><br><br><br><br><br><br><br><br><br><br><br><br><br><br><br><br><br><br><br><br><br><br><br><br><br><br><br><br><br><br><br><br><br><br><br><br><br><br><br><br><br><br><br><br><br><br><br><br><br><br><br><br><br><br><br><br><br><br><br><br><br><br><br><br><br><br><br><br><br><br><br><br><br><br><br><br><br><br><br><br><br><br><br><br><br><br><br><br><br><br><br><br><br><br><br><br><br><br><br><br><br><br><br><br><br><br><br><br><br><br><br><br><br><br><br><br><br><br><br><br><br><br><br><br><br><br><br><br><br><br><br><br><br><br><br><br><br><br><br><br><br><br><br><br><br><br><br><br><br><br><br><br><br><br><br><br><br><br><br><br><br><br><br><br><br><br><br><br><br><br><br><br><br><br><br><br><br><br><br><br><br><br><br><br><br><br><br><br><br><br><br><br><br><br><br><br><br><br><br><br><br><br><br><br><br><br><br><br><br><br><br><br><br><br><br><br><br><br><br><br><br><br><br><br><br><br><br><br><br><br><br><br><br><br><br><br><br><br><br><br><br><br><br><br><br><br><br><br><br><br><br><br><br><br><br><br><br><br><br><br><br><br><br><br><br><br><br><br><br><br><br><br><br><br><br><br><br><br><br><br><br><br><br><br><br><br><br><br><br><br><br><br><br><br><br><br><br><br><br><br><br><br><br><br><br><br><br><br><br><br><br><br><br><br><br><br><br><br><br><br><br><br><br><br><br><br><br><br><br><br><br><br><br><br><br><br><br><br><br><br><br><br><br><br><br><br><br><br><br><br><br><br><br><br><br><br>< |  |       |   |       |       |       |   |       |   |                            |                                            |           |               |

**Figure S1. Experimental and Calculated X-ray Powder Diffraction Patterns for  $\text{Bi}_6\text{Te}_2\text{O}_{15}$ .**

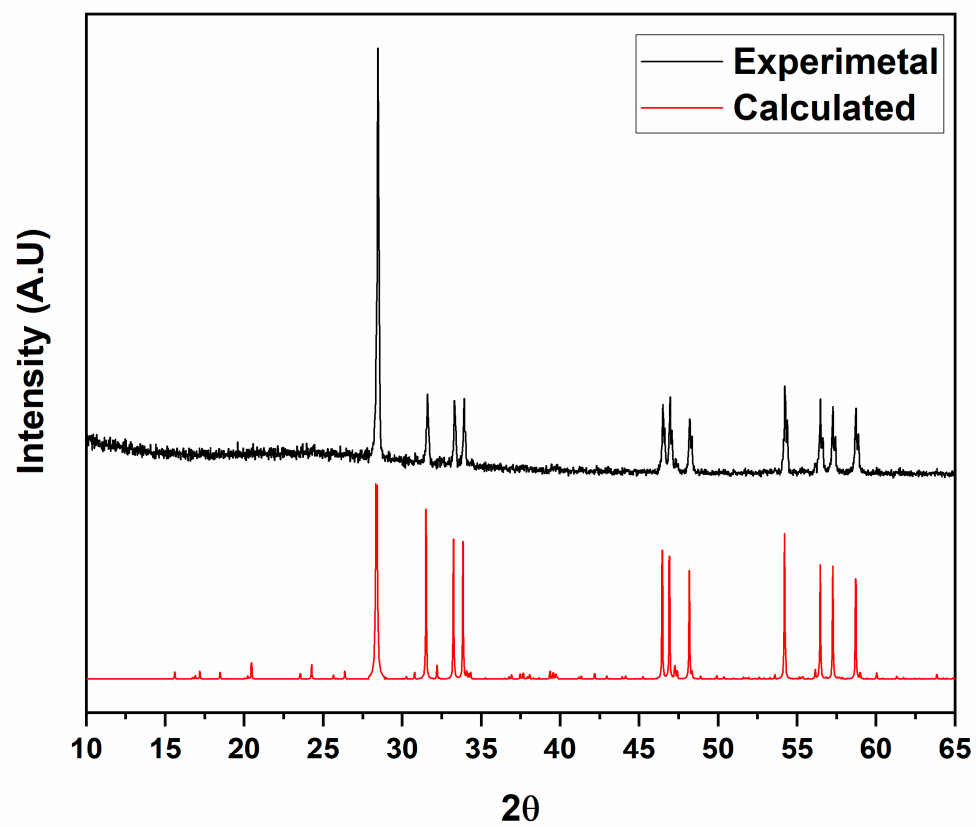

**Figure S2. FT-IR Spectra of  $\text{Bi}_6\text{Te}_2\text{O}_{15}$ .**

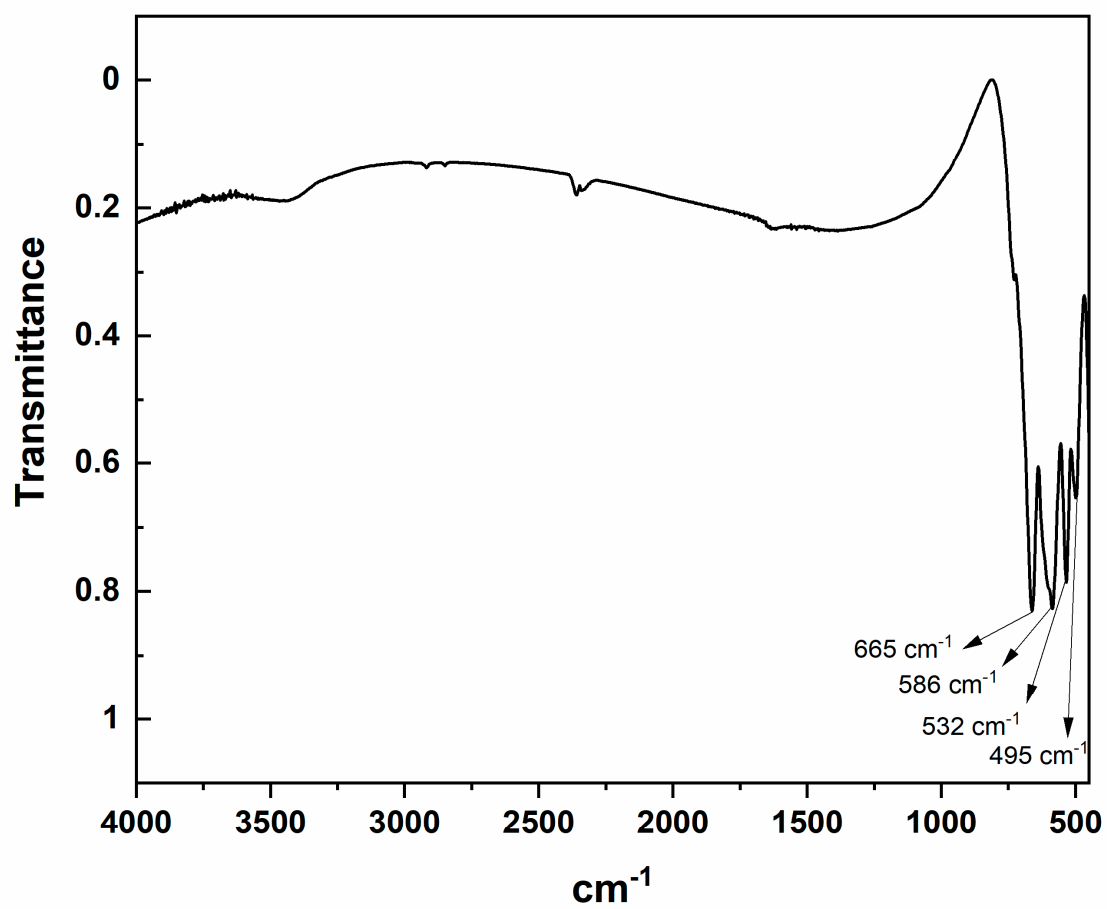

| $\text{Bi}_6\text{Te}_2\text{O}_{15}$ |                    |
|---------------------------------------|--------------------|
| $\nu(\text{Bi-O})$                    | $\nu(\text{Te-O})$ |
| 532                                   | 665                |
| 495                                   | 586                |

Figure S3. Thermogravimetric analysis (TGA) diagram for  $\text{Bi}_6\text{Te}_2\text{O}_{15}$ .

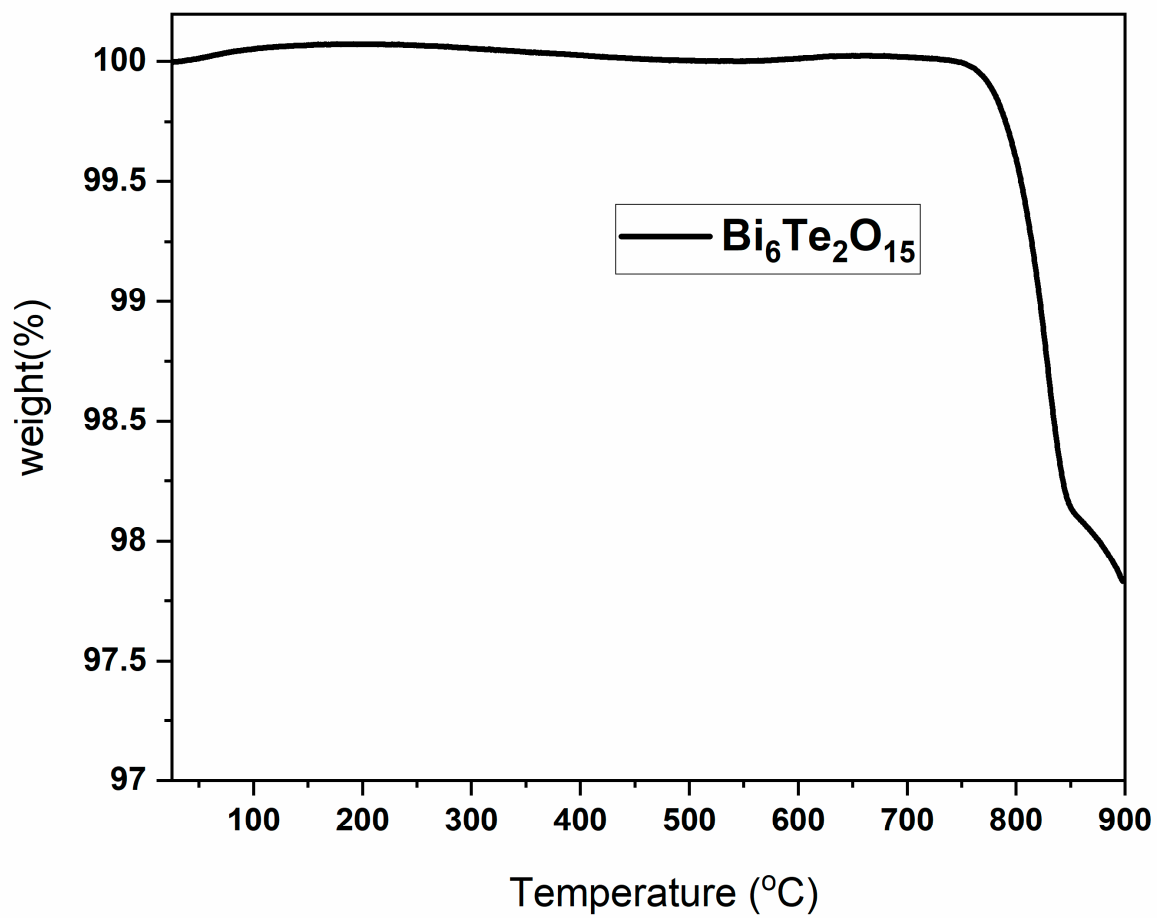

Figure S4. Powder XRD pattern for final residuals after TGA experiment

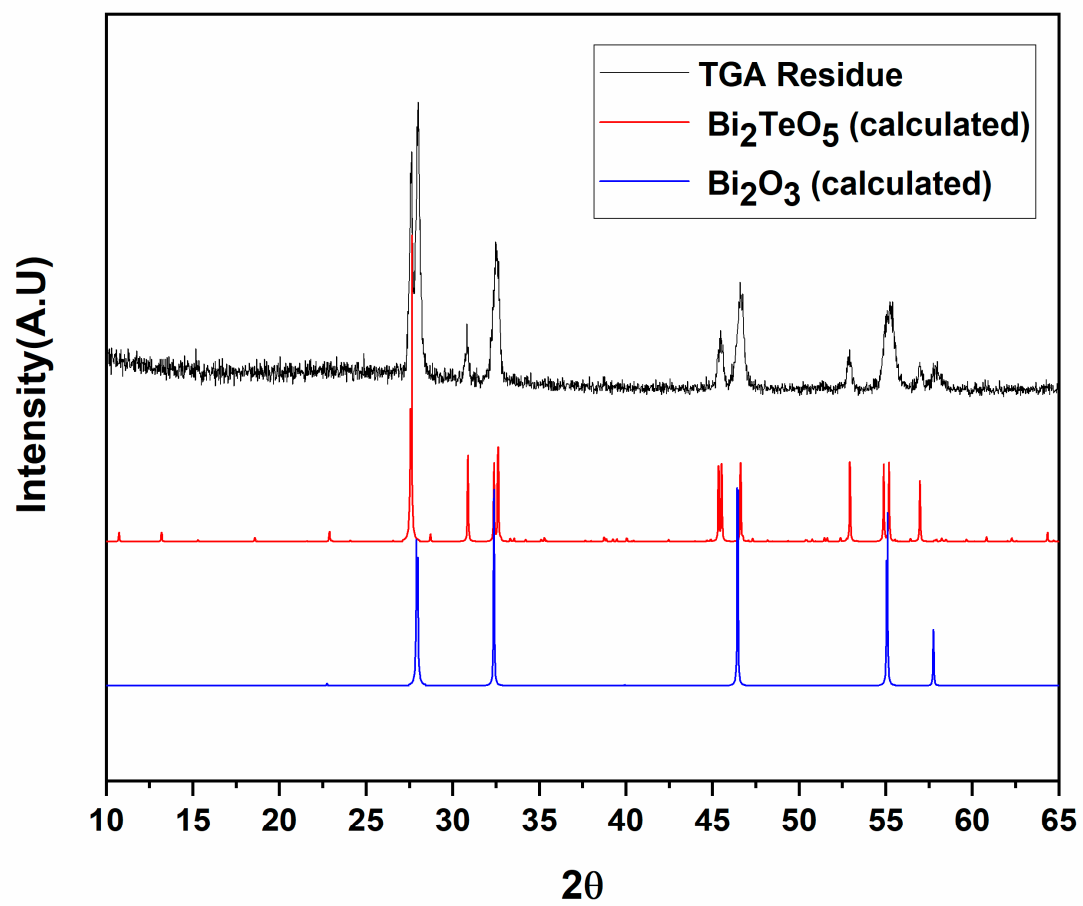

**Figure S5. Dependence of total energy *versus* the unit cell volume by selected potential**

(a) within GGA-PBE potential (b) within GGA-PBESol (c) within GGA-WC, respectively.

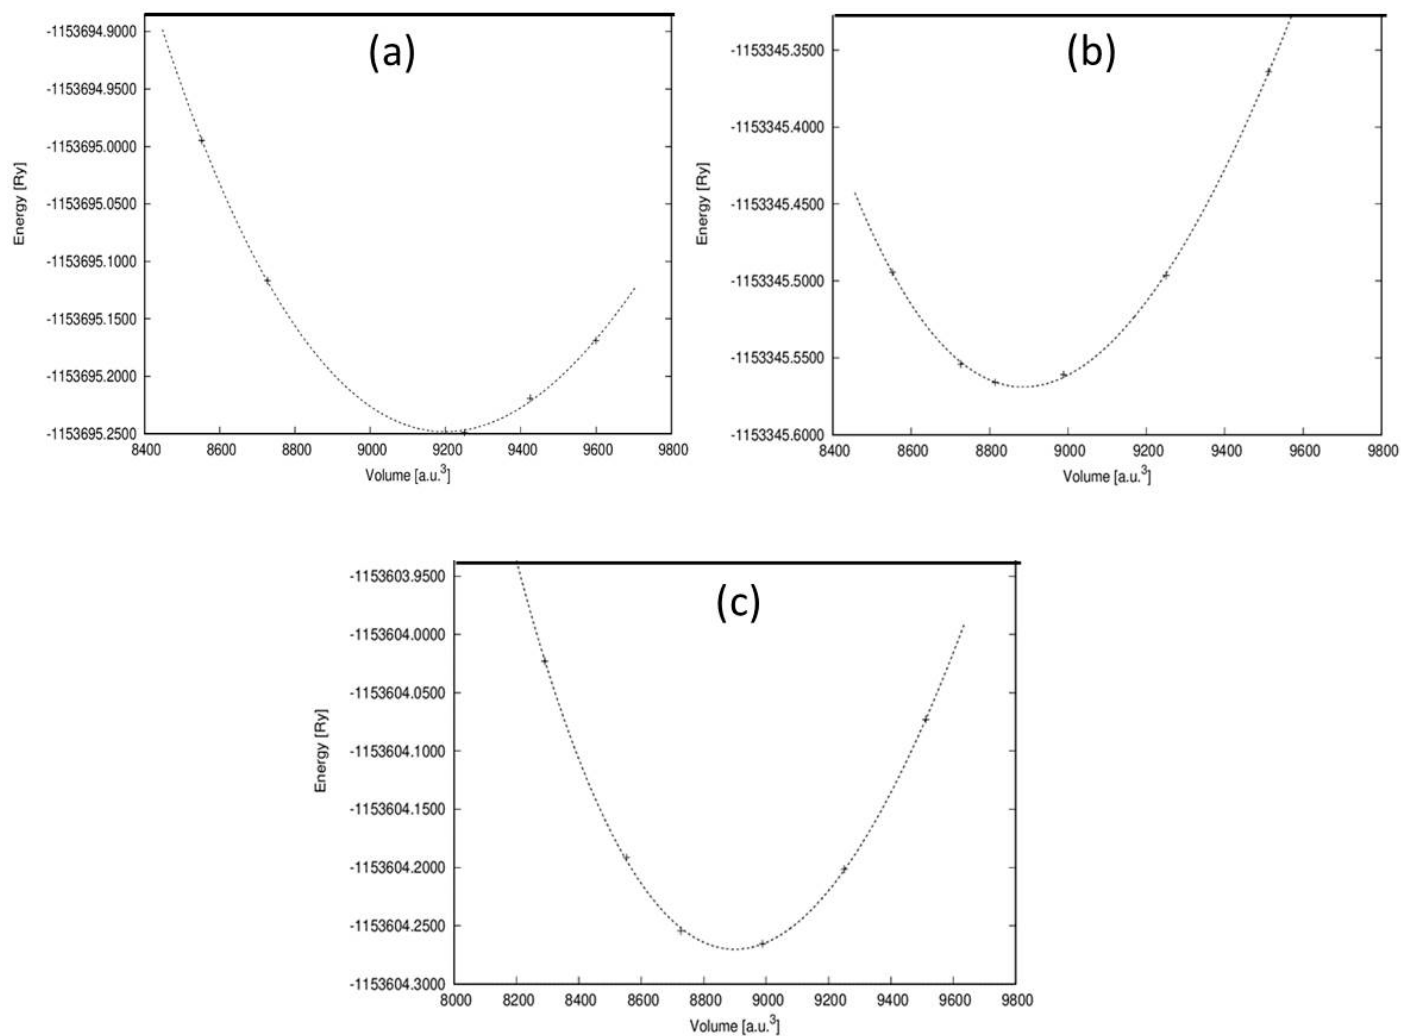

### Figure S6. Other optical properties

Reflectivity  $R(\omega)$ , Optical conductivity  $\sigma(\Omega\cdot\text{cm})^{-1}$ , Electron loss function  $L(\omega)$ , and Extinction coefficient  $k(\omega)$  are depicted.

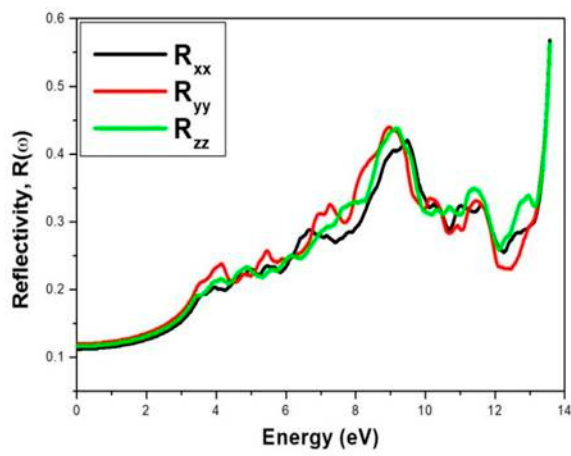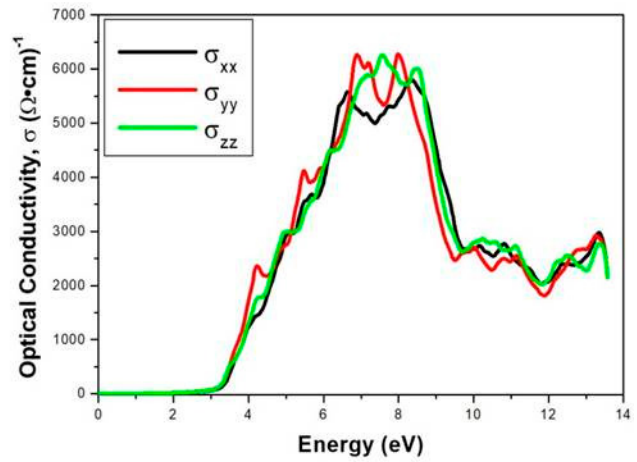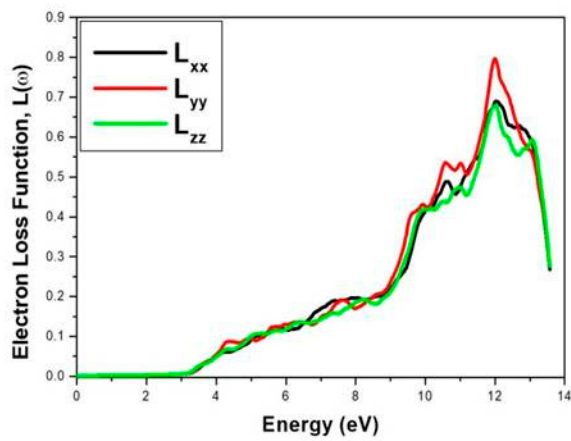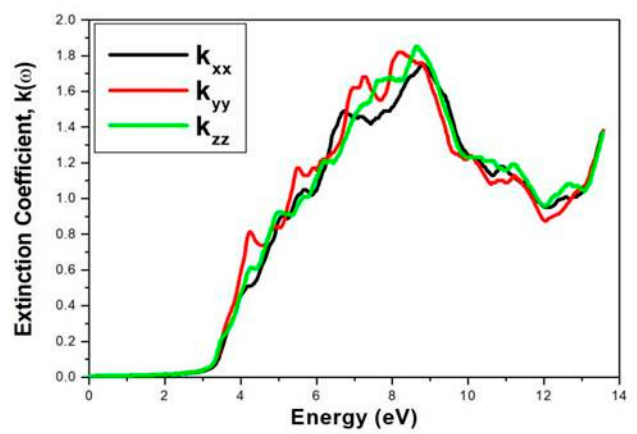

Supplement: s1 [file s1 › SI_Bi6Te2O15.pdf]
