# Supplementary material
Source: MDPI journal article supplement (https://www.mdpi.com/2073-4352/14/1/23)
Supplement: s1 [file s1]

Archive with 3 entries (3 files):
- Bi6Te2O15_Pnma.cif
- checkcif_Bi6Te2O15_Pnma.pdf
- SI_Bi6Te2O15.pdf
