# Supplementary material
Source: MDPI journal article supplement (https://www.mdpi.com/2073-4352/14/1/23)
Supplement: s1 [file s1 › Bi6Te2O15_Pnma.cif]

data_publication_text
_publ_requested_journal          Crystals
_publ_contact_author_name        'Sun Woo Kim'
_publ_contact_author_address     
;Department of Chemistry Education
Chosun University
309 Pilmun-daero, Dong-gu
Gwangju 61452, South Korea
;
_publ_contact_author_email       swookim@chosun.ac.kr
_publ_contact_author_phone       +82-62-230-7361
loop_
_publ_author_name
_publ_author_address
'Kim, Sun Woo'
;Department of Chemistry Education
Chosun University
309 Pilmun-daero, Dong-gu
Gwangju 61452, South Korea
;
'Chang, Hong Young'
;Department of Computer, Mathematics, and Physical Sciences (CMPS)
Sur Ross State University
Alpine, TX 798832, USA 
;

 
data_Bi6Te2O15_Pnma 
  
_audit_creation_method            'SHELXL-2018/3' 
_shelx_SHELXL_version_number      '2018/3' 
_chemical_name_systematic         ? 
_chemical_name_common             ? 
_chemical_melting_point           ? 
_chemical_formula_moiety          ? 
_chemical_formula_sum 
 'Bi6 O15 Te2' 
_chemical_formula_weight          1749.08 
  
loop_ 
 _atom_type_symbol 
 _atom_type_description 
 _atom_type_scat_dispersion_real 
 _atom_type_scat_dispersion_imag 
 _atom_type_scat_source 
 'O'  'O'   0.0106   0.0060 
 'International Tables Vol C Tables 4.2.6.8 and 6.1.1.4' 
 'Te'  'Te'  -0.5308   1.6751 
 'International Tables Vol C Tables 4.2.6.8 and 6.1.1.4' 
 'Bi'  'Bi'  -4.1077  10.2566 
 'International Tables Vol C Tables 4.2.6.8 and 6.1.1.4' 
  
_space_group_crystal_system       orthorhombic 
_space_group_IT_number            62 
_space_group_name_H-M_alt         'P n m a' 
_space_group_name_Hall            '-P 2ac 2n' 
  
_shelx_space_group_comment 
; 
The symmetry employed for this shelxl refinement is uniquely defined 
by the following loop, which should always be used as a source of 
symmetry information in preference to the above space-group names. 
They are only intended as comments. 
; 
  
loop_ 
 _space_group_symop_operation_xyz 
 'x, y, z' 
 '-x+1/2, -y, z+1/2' 
 '-x, y+1/2, -z' 
 'x+1/2, -y+1/2, -z+1/2' 
 '-x, -y, -z' 
 'x-1/2, y, -z-1/2' 
 'x, -y-1/2, z' 
 '-x-1/2, y-1/2, z-1/2' 
  
_cell_length_a                    10.5831(12) 
_cell_length_b                    22.694(3) 
_cell_length_c                    5.3843(6) 
_cell_angle_alpha                 90 
_cell_angle_beta                  90 
_cell_angle_gamma                 90 
_cell_volume                      1293.2(3) 
_cell_formula_units_Z             4 
_cell_measurement_temperature     100(2) 
_cell_measurement_reflns_used     2778 
_cell_measurement_theta_min       3.59 
_cell_measurement_theta_max       33.16 
  
_exptl_crystal_description        lathe 
_exptl_crystal_colour             colourless 
_exptl_crystal_density_meas       ? 
_exptl_crystal_density_method     ? 
_exptl_crystal_density_diffrn     8.984 
_exptl_crystal_F_000              2888 
_exptl_transmission_factor_min    ? 
_exptl_transmission_factor_max    ? 
_exptl_crystal_size_max           0.150 
_exptl_crystal_size_mid           0.040 
_exptl_crystal_size_min           0.030 
_exptl_absorpt_coefficient_mu     85.869 
_shelx_estimated_absorpt_T_min    0.027 
_shelx_estimated_absorpt_T_max    0.183 
_exptl_absorpt_correction_type    numerical 
_exptl_absorpt_correction_T_min   0.02840 
_exptl_absorpt_correction_T_max   0.13931 
_exptl_absorpt_process_details    'Bruker SAINT (SADABS)' 
_exptl_absorpt_special_details    ? 
_diffrn_ambient_temperature       100(2) 
_diffrn_radiation_wavelength      0.71073 
_diffrn_radiation_type            MoK\a 
_diffrn_source                    'sealed tube' 
_diffrn_measurement_device_type   'Bruker APEX' 
_diffrn_measurement_method        '\w scans' 
_diffrn_detector_area_resol_mean  ? 
_diffrn_reflns_number             7178 
_diffrn_reflns_av_unetI/netI      0.0260 
_diffrn_reflns_av_R_equivalents   0.0384 
_diffrn_reflns_limit_h_min        -12 
_diffrn_reflns_limit_h_max        13 
_diffrn_reflns_limit_k_min        -28 
_diffrn_reflns_limit_k_max        28 
_diffrn_reflns_limit_l_min        -6 
_diffrn_reflns_limit_l_max        6 
_diffrn_reflns_theta_min          1.795 
_diffrn_reflns_theta_max          26.372 
_diffrn_reflns_theta_full         25.242 
_diffrn_measured_fraction_theta_max   0.971 
_diffrn_measured_fraction_theta_full  0.969 
_diffrn_reflns_Laue_measured_fraction_max    0.971 
_diffrn_reflns_Laue_measured_fraction_full   0.969 
_diffrn_reflns_point_group_measured_fraction_max   0.971 
_diffrn_reflns_point_group_measured_fraction_full  0.969 
_reflns_number_total              1316 
_reflns_number_gt                 1038 
_reflns_threshold_expression      'I > 2\s(I)' 
_reflns_Friedel_coverage          0.000 
_reflns_Friedel_fraction_max      . 
_reflns_Friedel_fraction_full     . 
  
_reflns_special_details 
; 
 Reflections were merged by SHELXL according to the crystal 
 class for the calculation of statistics and refinement. 
  
 _reflns_Friedel_fraction is defined as the number of unique 
 Friedel pairs measured divided by the number that would be 
 possible theoretically, ignoring centric projections and 
 systematic absences. 
; 
  
_computing_data_collection        'Bruker SMART' 
_computing_cell_refinement        'Bruker SAINT' 
_computing_data_reduction         'Bruker SAINT' 
_computing_structure_solution     'SHELXL-2014/7 (Sheldrick, 2014)' 
_computing_structure_refinement 'SHELXL-2018/3 (Sheldrick, 2018)' 
_computing_molecular_graphics     'Bruker SHELXTL' 
_computing_publication_material   SHELXL-2014/7 
_refine_special_details           ? 
_refine_ls_structure_factor_coef  Fsqd 
_refine_ls_matrix_type            full 
_refine_ls_weighting_scheme       calc 
_refine_ls_weighting_details 
'w=1/[\s^2^(Fo^2^)+(0.0200P)^2^+44.0000P] where P=(Fo^2^+2Fc^2^)/3' 
_atom_sites_solution_primary      ? 
_atom_sites_solution_secondary    ? 
_atom_sites_solution_hydrogens    . 
_refine_ls_hydrogen_treatment     undef 
_refine_ls_extinction_method      'SHELXL-2018/3 (Sheldrick 2018)' 
_refine_ls_extinction_coef        0.00196(8) 
_refine_ls_extinction_expression 
 'Fc^*^=kFc[1+0.001xFc^2^\l^3^/sin(2\q)]^-1/4^' 
_refine_ls_number_reflns          1316 
_refine_ls_number_parameters      110 
_refine_ls_number_restraints      0 
_refine_ls_R_factor_all           0.0475 
_refine_ls_R_factor_gt            0.0364 
_refine_ls_wR_factor_ref          0.0791 
_refine_ls_wR_factor_gt           0.0744 
_refine_ls_goodness_of_fit_ref    1.079 
_refine_ls_restrained_S_all       1.079 
_refine_ls_shift/su_max           0.001 
_refine_ls_shift/su_mean          0.000 
  
loop_ 
 _atom_site_label 
 _atom_site_type_symbol 
 _atom_site_fract_x 
 _atom_site_fract_y 
 _atom_site_fract_z 
 _atom_site_U_iso_or_equiv 
 _atom_site_adp_type 
 _atom_site_occupancy 
 _atom_site_site_symmetry_order 
 _atom_site_calc_flag 
 _atom_site_refinement_flags_posn 
 _atom_site_refinement_flags_adp 
 _atom_site_refinement_flags_occupancy 
 _atom_site_disorder_assembly 
 _atom_site_disorder_group 
Bi1 Bi 0.37980(5) 0.50608(3) 0.71725(11) 0.01825(19) Uani 1 1 d . . . . . 
Bi2 Bi 0.63841(7) 0.750000 0.27671(14) 0.0180(2) Uani 1 2 d S T P . . 
Bi3 Bi 0.38992(7) 0.750000 0.73155(13) 0.0182(2) Uani 1 2 d S T P . . 
Bi4 Bi 0.61613(6) 0.37773(2) 0.76588(9) 0.01835(19) Uani 1 1 d . . . . . 
Te1 Te 0.63185(9) 0.62804(4) 0.75138(15) 0.0172(2) Uani 1 1 d . . . . . 
O1 O 0.5777(9) 0.6801(4) 1.0138(17) 0.0218(19) Uani 1 1 d . . . . . 
O2 O 0.6901(8) 0.5781(4) 0.4910(15) 0.0189(19) Uani 1 1 d . . . . . 
O3 O 0.5023(9) 0.6624(4) 0.5422(15) 0.021(2) Uani 1 1 d . . . . . 
O4 O 0.7597(8) 0.5934(4) 0.9553(16) 0.0196(19) Uani 1 1 d . . . . . 
O5 O 0.5105(9) 0.5734(4) 0.8916(17) 0.023(2) Uani 1 1 d . . . . . 
O6 O 0.7467(8) 0.6878(4) 0.6174(16) 0.0195(19) Uani 1 1 d . . . . . 
O7 O 0.5649(8) 0.4648(4) 0.6506(17) 0.0212(19) Uani 1 1 d . . . . . 
O8 O 0.8253(11) 0.750000 0.147(2) 0.019(3) Uani 1 2 d S T P . . 
  
loop_ 
 _atom_site_aniso_label 
 _atom_site_aniso_U_11 
 _atom_site_aniso_U_22 
 _atom_site_aniso_U_33 
 _atom_site_aniso_U_23 
 _atom_site_aniso_U_13 
 _atom_site_aniso_U_12 
Bi1 0.0199(3) 0.0168(3) 0.0180(3) -0.00028(19) 0.0008(2) -0.00093(18) 
Bi2 0.0207(4) 0.0156(4) 0.0178(4) 0.000 0.0003(3) 0.000 
Bi3 0.0197(4) 0.0172(4) 0.0178(4) 0.000 0.0004(3) 0.000 
Bi4 0.0215(3) 0.0157(3) 0.0178(3) -0.00009(19) -0.00020(17) 0.00026(17) 
Te1 0.0200(5) 0.0144(5) 0.0172(4) 0.0006(3) 0.0002(3) -0.0002(3) 
O1 0.025(5) 0.019(5) 0.021(5) -0.004(4) 0.003(4) -0.002(4) 
O2 0.019(4) 0.027(5) 0.011(4) -0.006(4) -0.002(3) -0.001(4) 
O3 0.024(5) 0.027(5) 0.011(4) 0.000(4) -0.002(4) 0.000(4) 
O4 0.018(4) 0.021(5) 0.020(5) 0.004(4) -0.003(4) 0.005(4) 
O5 0.032(5) 0.017(5) 0.022(5) -0.001(4) 0.000(4) -0.010(4) 
O6 0.025(5) 0.020(4) 0.013(4) -0.001(4) -0.002(4) -0.004(4) 
O7 0.016(4) 0.026(5) 0.022(5) -0.002(4) 0.001(4) -0.002(4) 
O8 0.017(6) 0.024(7) 0.016(6) 0.000 0.001(5) 0.000 
  
_geom_special_details 
; 
 All esds (except the esd in the dihedral angle between two l.s. planes) 
 are estimated using the full covariance matrix.  The cell esds are taken 
 into account individually in the estimation of esds in distances, angles 
 and torsion angles; correlations between esds in cell parameters are only 
 used when they are defined by crystal symmetry.  An approximate (isotropic) 
 treatment of cell esds is used for estimating esds involving l.s. planes. 
; 
  
loop_ 
 _geom_bond_atom_site_label_1 
 _geom_bond_atom_site_label_2 
 _geom_bond_distance 
 _geom_bond_site_symmetry_2 
 _geom_bond_publ_flag 
Bi1 O7 2.168(9) 5_666 ? 
Bi1 O7 2.200(8) . ? 
Bi1 O5 2.265(9) . ? 
Bi1 O2 2.335(9) 5_666 ? 
Bi1 O4 2.530(9) 6_557 ? 
Bi1 Bi1 3.4673(12) 5_666 ? 
Bi2 O8 2.098(12) . ? 
Bi2 O1 2.221(9) 1_554 ? 
Bi2 O1 2.221(9) 7_574 ? 
Bi2 O6 2.583(9) 7_575 ? 
Bi2 O6 2.583(9) . ? 
Bi2 Bi3 3.5935(11) . ? 
Bi3 O8 2.148(12) 6_556 ? 
Bi3 O6 2.226(9) 6_557 ? 
Bi3 O6 2.226(9) 4_466 ? 
Bi3 O3 2.531(10) . ? 
Bi3 O3 2.531(10) 7_575 ? 
Bi4 O7 2.142(9) . ? 
Bi4 O4 2.226(9) 2_664 ? 
Bi4 O3 2.269(9) 5_666 ? 
Bi4 O5 2.536(9) 5_667 ? 
Bi4 O2 2.585(9) 2_665 ? 
Bi4 O1 2.709(9) 5_667 ? 
Te1 O2 1.906(8) . ? 
Te1 O4 1.912(8) . ? 
Te1 O1 1.929(9) . ? 
Te1 O5 1.938(9) . ? 
Te1 O3 1.938(9) . ? 
Te1 O6 1.958(9) . ? 
  
loop_ 
 _geom_angle_atom_site_label_1 
 _geom_angle_atom_site_label_2 
 _geom_angle_atom_site_label_3 
 _geom_angle 
 _geom_angle_site_symmetry_1 
 _geom_angle_site_symmetry_3 
 _geom_angle_publ_flag 
O7 Bi1 O7 74.9(4) 5_666 . ? 
O7 Bi1 O5 90.5(3) 5_666 . ? 
O7 Bi1 O5 79.1(3) . . ? 
O7 Bi1 O2 84.0(3) 5_666 5_666 ? 
O7 Bi1 O2 81.7(3) . 5_666 ? 
O5 Bi1 O2 160.8(3) . 5_666 ? 
O7 Bi1 O4 64.0(3) 5_666 6_557 ? 
O7 Bi1 O4 136.1(3) . 6_557 ? 
O5 Bi1 O4 86.0(3) . 6_557 ? 
O2 Bi1 O4 107.7(3) 5_666 6_557 ? 
O7 Bi1 Bi1 37.8(2) 5_666 5_666 ? 
O7 Bi1 Bi1 37.2(2) . 5_666 ? 
O5 Bi1 Bi1 83.4(2) . 5_666 ? 
O2 Bi1 Bi1 81.0(2) 5_666 5_666 ? 
O4 Bi1 Bi1 100.55(19) 6_557 5_666 ? 
O8 Bi2 O1 93.4(3) . 1_554 ? 
O8 Bi2 O1 93.4(3) . 7_574 ? 
O1 Bi2 O1 91.1(5) 1_554 7_574 ? 
O8 Bi2 O6 79.6(3) . 7_575 ? 
O1 Bi2 O6 166.3(3) 1_554 7_575 ? 
O1 Bi2 O6 101.0(3) 7_574 7_575 ? 
O8 Bi2 O6 79.6(3) . . ? 
O1 Bi2 O6 101.0(3) 1_554 . ? 
O1 Bi2 O6 166.3(3) 7_574 . ? 
O6 Bi2 O6 66.3(4) 7_575 . ? 
O8 Bi2 Bi3 156.5(3) . . ? 
O1 Bi2 Bi3 102.9(2) 1_554 . ? 
O1 Bi2 Bi3 102.9(2) 7_574 . ? 
O6 Bi2 Bi3 80.8(2) 7_575 . ? 
O6 Bi2 Bi3 80.8(2) . . ? 
O8 Bi3 O6 97.4(3) 6_556 6_557 ? 
O8 Bi3 O6 97.4(3) 6_556 4_466 ? 
O6 Bi3 O6 78.8(5) 6_557 4_466 ? 
O8 Bi3 O3 76.6(3) 6_556 . ? 
O6 Bi3 O3 88.2(3) 6_557 . ? 
O6 Bi3 O3 164.9(3) 4_466 . ? 
O8 Bi3 O3 76.6(3) 6_556 7_575 ? 
O6 Bi3 O3 164.9(3) 6_557 7_575 ? 
O6 Bi3 O3 88.2(3) 4_466 7_575 ? 
O3 Bi3 O3 103.5(4) . 7_575 ? 
O8 Bi3 Bi2 65.6(3) 6_556 . ? 
O6 Bi3 Bi2 138.4(2) 6_557 . ? 
O6 Bi3 Bi2 138.4(2) 4_466 . ? 
O3 Bi3 Bi2 51.8(2) . . ? 
O3 Bi3 Bi2 51.8(2) 7_575 . ? 
O7 Bi4 O4 70.1(3) . 2_664 ? 
O7 Bi4 O3 91.1(3) . 5_666 ? 
O4 Bi4 O3 84.0(3) 2_664 5_666 ? 
O7 Bi4 O5 70.9(3) . 5_667 ? 
O4 Bi4 O5 136.9(3) 2_664 5_667 ? 
O3 Bi4 O5 114.5(3) 5_666 5_667 ? 
O7 Bi4 O2 88.8(3) . 2_665 ? 
O4 Bi4 O2 76.7(3) 2_664 2_665 ? 
O3 Bi4 O2 159.5(3) 5_666 2_665 ? 
O5 Bi4 O2 84.8(3) 5_667 2_665 ? 
O7 Bi4 O1 112.5(3) . 5_667 ? 
O4 Bi4 O1 156.8(3) 2_664 5_667 ? 
O3 Bi4 O1 73.0(3) 5_666 5_667 ? 
O5 Bi4 O1 59.5(3) 5_667 5_667 ? 
O2 Bi4 O1 125.7(3) 2_665 5_667 ? 
O2 Te1 O4 87.0(4) . . ? 
O2 Te1 O1 178.2(4) . . ? 
O4 Te1 O1 92.4(4) . . ? 
O2 Te1 O5 96.9(4) . . ? 
O4 Te1 O5 89.0(4) . . ? 
O1 Te1 O5 84.8(4) . . ? 
O2 Te1 O3 92.3(4) . . ? 
O4 Te1 O3 179.3(4) . . ? 
O1 Te1 O3 88.2(4) . . ? 
O5 Te1 O3 90.9(4) . . ? 
O2 Te1 O6 86.6(4) . . ? 
O4 Te1 O6 93.3(4) . . ? 
O1 Te1 O6 91.7(4) . . ? 
O5 Te1 O6 176.0(4) . . ? 
O3 Te1 O6 86.9(4) . . ? 
Te1 O1 Bi2 144.9(5) . 1_556 ? 
Te1 O1 Bi4 104.4(4) . 5_667 ? 
Bi2 O1 Bi4 106.6(3) 1_556 5_667 ? 
Te1 O2 Bi1 137.5(4) . 5_666 ? 
Te1 O2 Bi4 111.8(4) . 2_664 ? 
Bi1 O2 Bi4 110.1(3) 5_666 2_664 ? 
Te1 O3 Bi4 130.9(5) . 5_666 ? 
Te1 O3 Bi3 114.5(4) . . ? 
Bi4 O3 Bi3 110.5(4) 5_666 . ? 
Te1 O4 Bi4 136.7(5) . 2_665 ? 
Te1 O4 Bi1 117.8(4) . 6_657 ? 
Bi4 O4 Bi1 102.1(3) 2_665 6_657 ? 
Te1 O5 Bi1 132.5(4) . . ? 
Te1 O5 Bi4 110.7(4) . 5_667 ? 
Bi1 O5 Bi4 105.9(4) . 5_667 ? 
Te1 O6 Bi3 136.7(4) . 6_657 ? 
Te1 O6 Bi2 111.4(4) . . ? 
Bi3 O6 Bi2 102.4(3) 6_657 . ? 
Bi4 O7 Bi1 118.5(4) . 5_666 ? 
Bi4 O7 Bi1 124.8(4) . . ? 
Bi1 O7 Bi1 105.1(4) 5_666 . ? 
Bi2 O8 Bi3 128.1(6) . 6_656 ? 
  
  
_refine_diff_density_max    2.415 
_refine_diff_density_min   -1.457 
_refine_diff_density_rms    0.326 
  
_shelx_res_file 
; 
TITL Bi6Te2O15_Pnma in Pnma 
    Bi6Te2O15_Pnma.res 
    created by SHELXL-2018/3 at 14:13:32 on 12-Aug-2019 
CELL 0.71073  10.58310  22.69400   5.38430  90.0000  90.0000  90.0000 
ZERR    4.00   0.00120   0.00270   0.00060   0.0000   0.0000   0.0000 
LATT 1 
SYMM 1/2-X, -Y, 1/2+Z 
SYMM -X, 1/2+Y, -Z 
SYMM 1/2+X, 1/2-Y, 1/2-Z 
SFAC O Te Bi 
UNIT 60 8 24 
LIST 4 
ACTA 
SHEL .8 88. 
L.S. 5 
OMIT      0   8   0 
OMIT      2   4   1 
OMIT      4   0   4 
OMIT      2  12   1 
OMIT      0   0   4 
OMIT      4   0   2 
OMIT      4   8   0 
OMIT      8   0   0 
OMIT      0  16   0 
OMIT      0   8   4 
OMIT      2   4   5 
OMIT      6   4   3 
OMIT      8   0   2 
OMIT      0   8   2 
OMIT      8   8   2 
OMIT     10   4   1 
OMIT      4   8   4 
OMIT      2  20   3 
OMIT      6   4   1 
OMIT      0  24   0 
OMIT      2   4   3 
OMIT      2   4   0 
OMIT      2   0   0 
OMIT      2   4   2 
OMIT      4   0   1 
OMIT      5   0   6 
OMIT     12   8   2 
OMIT      8   0   4 
OMIT      2   0   1 
OMIT      0   4   0 
OMIT      8  16   2 
OMIT      0   0   2 
OMIT     12   8   0 
OMIT      1   0   4 
OMIT      2  20   1 
OMIT      0  16   4 
OMIT      6  20   3 
OMIT      2  12   5 
OMIT     10   4   3 
CONF 
BOND $H 
FMAP -2 
PLAN 20 
SIZE 0.03 0.04 0.15 
TEMP -173.0 
WGHT    0.020000   44.000000 
EXTI    0.001963 
FVAR       0.02618 
BI1   3    0.379800    0.506076    0.717253    11.00000    0.01985    0.01685 = 
         0.01804   -0.00028    0.00076   -0.00093 
BI2   3    0.638407    0.750000    0.276712    10.50000    0.02068    0.01560 = 
         0.01780    0.00000    0.00026    0.00000 
BI3   3    0.389921    0.750000    0.731553    10.50000    0.01973    0.01720 = 
         0.01779    0.00000    0.00040    0.00000 
BI4   3    0.616127    0.377726    0.765876    11.00000    0.02154    0.01575 = 
         0.01776   -0.00009   -0.00020    0.00026 
TE1   2    0.631847    0.628039    0.751383    11.00000    0.01999    0.01437 = 
         0.01723    0.00065    0.00019   -0.00018 
O1    1    0.577715    0.680107    1.013754    11.00000    0.02498    0.01885 = 
         0.02144   -0.00396    0.00270   -0.00177 
O2    1    0.690084    0.578064    0.490987    11.00000    0.01923    0.02651 = 
         0.01091   -0.00612   -0.00233   -0.00120 
O3    1    0.502255    0.662378    0.542154    11.00000    0.02428    0.02748 = 
         0.01073   -0.00013   -0.00169    0.00045 
O4    1    0.759723    0.593351    0.955259    11.00000    0.01830    0.02087 = 
         0.01971    0.00393   -0.00319    0.00464 
O5    1    0.510537    0.573399    0.891553    11.00000    0.03174    0.01694 = 
         0.02178   -0.00131   -0.00003   -0.00988 
O6    1    0.746680    0.687772    0.617403    11.00000    0.02544    0.02018 = 
         0.01295   -0.00112   -0.00165   -0.00369 
O7    1    0.564858    0.464826    0.650622    11.00000    0.01591    0.02611 = 
         0.02171   -0.00168    0.00145   -0.00184 
O8    1    0.825284    0.750000    0.146697    10.50000    0.01687    0.02367 = 
         0.01573    0.00000    0.00087    0.00000 
HKLF  4 
  
  
  
  
REM  Bi6Te2O15_Pnma in Pnma 
REM wR2 = 0.0791, GooF = S = 1.079, Restrained GooF = 1.079 for all data 
REM R1 = 0.0364 for 1038 Fo > 4sig(Fo) and 0.0475 for all 1316 data 
REM 110 parameters refined using 0 restraints 
  
END 
  
WGHT      0.0574      8.3079 
  
REM Highest difference peak  2.415,  deepest hole -1.457,  1-sigma level  0.326 
Q1    1   0.5744  0.7500  0.2045  10.50000  0.05    2.42 
Q2    1   0.3888  0.4975  0.8486  11.00000  0.05    1.81 
Q3    1   0.4796  0.7500  0.1573  10.50000  0.05    1.48 
Q4    1   0.6964  0.6243  0.6599  11.00000  0.05   -1.46 
Q5    1   0.5382  0.6177  0.8081  11.00000  0.05   -1.42 
Q6    1   0.2830  0.7500  0.7080  10.50000  0.05   -1.37 
Q7    1   0.6075  0.6539  0.7933  11.00000  0.05   -1.34 
Q8    1   0.6922  0.7500  0.3429  10.50000  0.05   -1.30 
Q9    1   0.3184  0.7500  0.9202  10.50000  0.05   -1.29 
Q10   1   0.2810  0.7500  0.8286  10.50000  0.05   -1.27 
Q11   1   0.4282  0.7234  0.5976  11.00000  0.05    1.26 
Q12   1   0.4280  0.7183  0.8090  11.00000  0.05    1.24 
Q13   1   0.4619  0.5170  0.7033  11.00000  0.05    1.23 
Q14   1   0.8971  0.7500  0.1992  10.50000  0.05    1.23 
Q15   1   0.3806  0.4726  0.9045  11.00000  0.05   -1.20 
Q16   1   0.3339  0.7500  0.7971  10.50000  0.05    1.19 
Q17   1   0.4827  0.6227  0.6700  11.00000  0.05    1.17 
Q18   1   0.8248  0.7105  0.2189  11.00000  0.05    1.15 
Q19   1   0.6670  0.6407  0.5391  11.00000  0.05    1.13 
Q20   1   0.6233  0.6024  0.7762  11.00000  0.05   -1.09 
; 
_shelx_res_checksum   86579 
  
_shelx_hkl_file 
; 
   0   0   1    2.95    0.24 
   0   0  -2  684.46    3.54 
   0   0   2  678.34    4.81 
   0   0  -3    0.37    0.18 
   0   0   3    0.12    0.21 
   0   0  -4  394.61    3.48 
   0   0   4  392.35    4.44 
   0   0   5    0.19    0.22 
   0   0  -5    0.32    0.25 
   0   0   6  154.55    3.13 
   1   0   0    0.54    0.09 
   1   0   0    0.11    0.07 
   1   0  -1   11.62    0.47 
   1   0   1   11.33    0.51 
   1   0   1   10.81    0.33 
  -1   0   1   11.83    0.36 
   1   0   2   43.51    1.25 
   1   0  -2   43.84    1.06 
   1   0   2   44.80    0.84 
  -1   0   2   44.25    0.96 
   1   0  -3   31.10    1.05 
   1   0   3   30.73    1.21 
  -1   0   3   31.24    1.02 
  -1   0  -3   30.18    0.82 
  -1   0  -4   82.75    1.44 
   1   0  -4   82.65    1.69 
  -1   0   4   82.20    1.80 
   1   0   4   79.38    2.07 
   1   0  -5   28.43    1.09 
  -1   0   5   29.12    1.18 
   1   0   5   27.99    1.34 
  -1   0   6   94.82    2.23 
   1   0   6   93.48    2.49 
   1   0   7   17.08    1.18 
   2   0   0   10.92    0.44 
   2   0   0   10.80    0.38 
   2   0   1   20.88    0.64 
   2   0   1   20.56    0.79 
   2   0  -1   19.89    0.78 
   2   0   2    2.88    0.41 
   2   0  -2    4.07    0.42 
   2   0   2    4.37    0.26 
  -2   0   2    7.05    0.41 
   2   0   3    4.12    0.56 
  -2   0  -3    4.98    0.34 
   2   0  -3    5.02    0.49 
  -2   0   3    5.74    0.42 
   2   0  -4    0.49    0.28 
  -2   0  -4    1.48    0.28 
  -2   0   4    1.36    0.33 
   2   0   4    0.76    0.34 
  -2   0   5    1.35    0.39 
   2   0   5    1.59    0.44 
   2   0  -5    1.04    0.38 
   2   0   6    0.37    0.34 
   2   0   7   12.58    1.03 
   3   0   0    0.37    0.20 
   3   0   0    0.42    0.17 
   3   0   1   13.25    0.52 
   3   0   1   15.38    0.71 
   3   0  -1   12.99    0.65 
  -3   0   2   57.70    0.76 
   3   0   2   58.52    1.63 
   3   0  -2   56.56    1.45 
   3   0  -3   24.65    1.02 
  -3   0   3   25.02    0.74 
   3   0   3   24.90    1.12 
   3   0  -4  102.34    2.15 
  -3   0   4  105.11    1.65 
   3   0   4   97.54    2.50 
   3   0  -5   23.36    1.10 
   3   0   5   23.71    1.32 
   3   0  -6   66.64    1.78 
   3   0   6   66.94    2.13 
   3   0   7   11.47    0.88 
   4   0   0  667.06    3.97 
   4   0   0  668.15    4.55 
   4   0   1    2.17    0.31 
   4   0  -1    1.78    0.32 
   4   0   1    1.50    0.29 
   4   0   2  632.71    5.67 
   4   0   2  625.60    5.83 
   4   0  -2  622.73    5.17 
  -4   0   3    1.25    0.19 
   4   0  -3    0.41    0.26 
   4   0   3    0.32    0.26 
   4   0  -4  324.22    3.91 
   4   0   4  324.45    4.59 
   4   0   5   -0.24    0.15 
   4   0  -5    0.07    0.27 
   4   0   6  127.57    3.17 
   4   0  -6  128.10    2.56 
   4   0   7    0.39    0.30 
   5   0   0    0.88    0.27 
   5   0   0    0.35    0.17 
   5   0   1    0.32    0.22 
   5   0  -1    0.14    0.21 
   5   0   1    0.90    0.26 
   5   0  -2   36.02    1.34 
   5   0   2   35.09    1.20 
   5   0   2   37.32    1.32 
   5   0  -3   31.37    1.26 
   5   0   3   30.53    1.37 
   5   0  -4   60.54    1.80 
   5   0   4   58.90    1.99 
   5   0  -5   11.59    0.92 
   5   0   5   12.60    1.02 
   5   0  -6   58.72    1.98 
   5   0   6   55.21    2.34 
   5   0   7   13.86    1.11 
   6   0   0   24.43    0.95 
   6   0   0   26.56    1.09 
   6   0   1   14.81    0.80 
   6   0  -1   15.01    0.90 
   6   0   1   15.98    0.81 
   6   0  -1   15.66    0.69 
   6   0   2   13.49    0.89 
   6   0  -2   12.71    0.85 
   6   0   2   11.40    0.74 
   6   0  -3    0.89    0.40 
   6   0   3    1.91    0.48 
   6   0  -4    4.82    0.61 
   6   0   4    4.80    0.69 
   6   0  -5    3.63    0.59 
   6   0   5    2.83    0.56 
   6   0   6    2.92    0.67 
   6   0  -6    0.93    0.39 
   6   0   7    7.24    0.96 
   6   0  -7    8.15    0.79 
   7   0   0    0.44    0.29 
   7   0   0    0.76    0.25 
   7   0  -1    2.17    0.37 
   7   0   1    1.90    0.40 
   7   0   1    2.48    0.44 
   7   0  -1    2.31    0.46 
   7   0   2   34.85    1.41 
   7   0   2   32.72    1.23 
   7   0  -2   34.88    1.43 
   7   0  -3    7.34    0.76 
   7   0   3    7.25    0.71 
   7   0   4   69.94    2.29 
   7   0  -4   69.97    2.06 
   7   0  -5   17.29    1.05 
   7   0   5   16.45    1.10 
   7   0  -6   70.18    2.10 
   7   0   6   66.54    2.29 
   7   0   7   10.99    1.06 
   7   0  -7   10.50    0.88 
   8   0   0  448.25    4.13 
   8   0   0  452.27    4.54 
   8   0   1    0.74    0.29 
   8   0  -1    0.45    0.26 
   8   0  -1    0.51    0.33 
   8   0   1    0.40    0.28 
   8   0   2  375.77    4.19 
   8   0  -2  371.62    4.98 
   8   0   2  371.50    4.74 
   8   0   3   -0.10    0.20 
   8   0  -3    0.26    0.30 
   8   0   4  192.79    3.60 
   8   0  -4  192.04    3.31 
   8   0  -5    0.22    0.32 
   8   0   5   -0.12    0.26 
   8   0  -6   83.84    2.28 
   8   0   6   84.34    2.55 
   9   0   0    1.12    0.47 
   9   0   0    0.18    0.19 
   9   0   1    1.71    0.41 
   9   0   1    2.26    0.42 
   9   0  -1    1.40    0.42 
   9   0   2   12.22    0.92 
   9   0  -2   12.86    0.93 
   9   0   3    2.59    0.52 
   9   0  -3    2.91    0.58 
   9   0  -4   22.16    1.22 
   9   0   4   25.27    1.47 
   9   0  -5    8.96    0.87 
   9   0   5    8.58    0.91 
   9   0  -6   18.97    1.13 
   9   0   6   21.32    1.37 
  10   0   0   18.85    0.97 
  10   0   0   17.41    1.10 
  10   0   1    1.75    0.39 
  10   0   1    3.14    0.55 
  10   0  -1    3.94    0.61 
  10   0  -2   12.61    0.87 
  10   0   2   11.81    0.89 
  10   0   3   -0.13    0.21 
  10   0  -3    0.53    0.34 
  10   0   4    8.80    0.83 
  10   0  -4   10.99    0.95 
  10   0   5    2.40    0.50 
  10   0  -5    2.59    0.54 
  10   0   6    2.33    0.60 
  10   0  -6    2.76    0.59 
  11   0   0    0.26    0.27 
  11   0  -1    0.88    0.38 
  11   0   1    0.62    0.32 
  11   0   1    0.94    0.32 
  11   0  -2   21.33    1.20 
  11   0   2   19.17    1.08 
  11   0   3    5.55    0.73 
  11   0  -3    7.01    0.76 
  11   0   4   36.48    1.64 
  11   0  -4   37.42    1.62 
  11   0   5    5.24    0.79 
  11   0  -5    5.61    0.77 
  12   0   0  155.56    2.86 
  12   0  -1    0.02    0.19 
  12   0   2  151.78    2.83 
  12   0  -2  155.59    2.98 
  12   0   3    0.14    0.29 
  12   0  -3    0.39    0.28 
  12   0  -4   83.07    2.22 
  12   0   4   79.18    2.28 
  12   0  -5    0.01    0.27 
  12   0   5   -0.38    0.24 
  13   0   0    0.37    0.25 
  13   0  -1    0.21    0.26 
  13   0  -2    2.00    0.48 
  13   0  -3    1.85    0.51 
  13   0   3    1.30    0.40 
  13   0  -4    5.61    0.74 
  13   0   4    6.53    0.84 
  14   0   0   13.97    1.01 
  14   0  -1    0.52    0.32 
  14   0  -2    9.86    0.81 
  14   0  -3    0.20    0.28 
  15   0  -1   -0.04    0.30 
  15   0  -2    4.12    0.61 
   0  -1   0   -0.11    0.06 
   0   1   0   -0.09    0.03 
   0  -1   1    5.26    0.35 
   0   1   1    6.19    0.38 
   0   1  -1    6.12    0.28 
   0   1   1    5.97    0.36 
   0   1   2    0.48    0.22 
   0  -1   2    0.58    0.19 
   0   1   2    0.43    0.18 
   0   1  -2    1.25    0.23 
   0  -1   3   12.15    0.79 
   0   1  -3   10.76    0.57 
   0  -1  -3   11.27    0.65 
   0   1   3   11.09    0.72 
   0  -1   4    0.27    0.26 
   0   1  -4    0.48    0.25 
   0   1   4    0.11    0.21 
   0  -1  -4    0.29    0.23 
   0  -1  -5    0.18    0.23 
   0  -1   5    0.58    0.34 
   0   1  -5    0.64    0.26 
   0   1   5    0.15    0.23 
   0   1   6    0.00    0.20 
   0  -1   6    0.24    0.29 
   1  -1   0    0.00    0.06 
   1   1   0    0.05    0.06 
  -1   1   0    0.04    0.06 
   1   1   0    0.05    0.07 
   1  -1   1    0.71    0.19 
   1   1  -1    0.98    0.21 
  -1   1   1    0.58    0.14 
   1   1   1    0.55    0.19 
  -1  -1   1    0.79    0.15 
   1   1   1    0.72    0.19 
   1  -1   2    0.89    0.29 
   1   1  -2    1.19    0.25 
  -1   1   2    1.50    0.28 
   1   1   2    1.03    0.22 
   1  -1  -2    1.24    0.29 
   1   1   2    1.31    0.32 
  -1   1  -2    1.31    0.19 
  -1   1   3    5.62    0.48 
   1  -1   3    5.06    0.54 
   1   1  -3    5.18    0.44 
   1  -1  -3    5.03    0.49 
  -1  -1   3    5.20    0.45 
   1   1   3    6.77    0.64 
  -1   1  -3    5.76    0.40 
  -1  -1  -4    1.00    0.26 
  -1   1   4    1.00    0.30 
   1   1  -4    1.21    0.33 
   1  -1   4    1.41    0.41 
   1   1   4    1.65    0.44 
  -1  -1   4    1.61    0.37 
  -1   1  -4    1.88    0.32 
   1  -1  -4    2.12    0.41 
   1   1  -5    3.84    0.48 
   1  -1   5    2.65    0.61 
  -1   1   5    5.62    0.70 
  -1  -1   5    4.22    0.58 
   1  -1  -5    3.99    0.54 
   1   1   5    3.90    0.61 
   1  -1   6    3.54    0.68 
  -1   1   6    5.99    0.73 
   1   1   6    5.22    0.72 
  -1  -1   6    5.78    0.71 
   1  -1   7    4.77    0.74 
   1   1   7    3.67    0.60 
   2   1   0   13.94    0.54 
   2  -1   0   13.56    0.42 
   2   1   0   14.39    0.51 
   2  -1   0   13.50    0.48 
   2   1  -1    0.44    0.24 
   2  -1   1    0.51    0.19 
  -2  -1   1    0.59    0.13 
   2  -1  -1    0.44    0.19 
   2   1   1    0.19    0.26 
   2   1   1    0.64    0.23 
   2  -1   2   26.46    1.07 
   2   1  -2   25.99    0.91 
  -2   1   2   26.35    0.68 
   2  -1  -2   25.75    0.97 
   2   1   2   26.27    0.78 
   2   1   2   26.06    1.04 
  -2  -1   2   26.17    0.70 
   2  -1   3    0.10    0.19 
   2   1  -3    0.19    0.22 
  -2   1   3    0.24    0.15 
   2  -1  -3    0.51    0.26 
  -2  -1   3    0.63    0.24 
  -2   1  -3    0.73    0.16 
   2   1   3    0.54    0.28 
   2   1   3    0.42    0.17 
  -2  -1  -4    5.00    0.42 
   2   1  -4    3.11    0.46 
  -2   1   4    4.95    0.54 
   2  -1   4    4.92    0.77 
  -2   1  -4    4.84    0.38 
  -2  -1   4    5.30    0.52 
   2  -1  -4    4.27    0.58 
   2   1   4    5.33    0.77 
  -2   1   5    0.26    0.18 
   2  -1   5    0.11    0.28 
   2   1  -5    0.15    0.25 
   2  -1  -5    0.24    0.27 
  -2  -1   5    0.06    0.21 
   2   1   5    0.17    0.23 
   2  -1   6    3.35    0.64 
   2  -1  -6    3.50    0.53 
   2   1   6    3.25    0.63 
   2  -1   7    0.22    0.31 
   2   1   7    0.31    0.30 
   3  -1   0    0.03    0.17 
   3  -1   0    0.04    0.12 
   3   1   0    0.05    0.19 
   3   1   0   -0.13    0.14 
   3   1  -1    1.74    0.33 
   3  -1   1    1.48    0.29 
   3  -1   1    1.31    0.19 
   3   1   1    1.62    0.29 
   3  -1  -1    1.41    0.31 
   3   1   1    1.36    0.28 
   3   1  -2    0.04    0.21 
   3  -1   2    0.32    0.22 
   3   1   2    0.31    0.21 
   3   1   2    0.78    0.27 
   3  -1  -2    0.06    0.19 
  -3  -1   2    0.28    0.12 
   3   1  -3    1.38    0.37 
   3  -1   3    1.57    0.41 
  -3   1   3    1.84    0.27 
   3   1   3    1.62    0.24 
   3  -1  -3    1.36    0.36 
  -3  -1   3    1.63    0.27 
   3   1   3    0.91    0.32 
   3  -1   4   -0.05    0.21 
   3   1  -4   -0.05    0.22 
  -3   1   4    0.43    0.24 
   3  -1  -4    0.02    0.23 
  -3  -1   4    0.06    0.19 
   3   1   4    0.14    0.25 
   3   1  -5    1.32    0.38 
   3  -1   5    1.25    0.41 
   3   1   5    1.91    0.46 
   3  -1  -5    2.32    0.48 
   3   1  -6    0.55    0.31 
   3  -1   6    0.16    0.30 
   3  -1  -6   -0.02    0.23 
   3   1   6   -0.12    0.24 
   3  -1   7    2.75    0.62 
   3   1   7    3.12    0.65 
   4   1   0   48.15    1.15 
   4   1   0   48.50    1.27 
   4  -1   0   49.16    1.07 
   4  -1   0   47.47    1.21 
   4   1  -1   18.62    0.87 
   4  -1   1   19.48    0.86 
   4  -1   1   18.92    0.64 
   4   1   1   18.90    0.73 
   4  -1  -1   18.06    0.86 
   4   1   1   18.40    0.85 
   4   1  -2   46.69    1.42 
   4  -1   2   47.42    1.49 
   4  -1  -2   44.99    1.38 
   4   1   2   44.37    1.47 
   4   1   2   37.17    1.78 
  -4   1   3    1.10    0.19 
   4   1  -3    1.17    0.36 
   4  -1   3    1.27    0.39 
   4  -1  -3    1.18    0.36 
   4   1   3    0.57    0.31 
  -4  -1   3    1.13    0.19 
   4   1   3    1.81    0.24 
   4   1  -4   15.75    0.92 
   4  -1   4   16.03    1.08 
   4   1   4   16.04    1.08 
  -4  -1   4   13.14    0.88 
   4  -1  -4   17.33    0.96 
   4   1  -5    1.47    0.40 
   4  -1   5    0.99    0.35 
   4  -1  -5    0.95    0.35 
   4   1   5    0.86    0.38 
   4  -1   6    8.01    0.84 
   4   1  -6    6.21    0.77 
   4   1   6    8.39    0.86 
   4  -1  -6    6.82    0.78 
   4  -1   7    0.03    0.28 
   4   1   7    0.18    0.36 
   5   1   0   -0.14    0.13 
   5   1   0   -0.09    0.19 
   5  -1   0    0.14    0.15 
   5  -1   0    0.18    0.24 
   5  -1   1    1.96    0.36 
   5   1  -1    2.15    0.40 
   5  -1   1    2.02    0.38 
   5  -1  -1    2.16    0.42 
   5   1   1    1.88    0.37 
   5   1   1    2.55    0.38 
  -5  -1   1    2.03    0.29 
   5   1  -2    3.91    0.55 
   5  -1   2    5.70    0.60 
   5  -1   2    3.38    0.49 
   5   1   2    4.30    0.61 
   5   1   2    4.33    0.56 
   5  -1  -2    4.37    0.58 
   5   1  -3    1.69    0.41 
   5  -1   3    1.79    0.45 
   5  -1  -3    1.95    0.43 
   5   1   3    1.96    0.47 
   5   1   3    2.32    0.50 
   5   1  -4    8.14    0.76 
   5  -1   4    8.56    0.79 
   5  -1  -4    8.28    0.76 
   5   1   4    9.31    0.85 
   5   1  -5    7.25    0.72 
   5  -1   5    8.10    0.84 
   5   1   5    7.49    0.77 
   5  -1  -5    7.94    0.76 
   5   1  -6    6.51    0.71 
   5  -1   6    6.00    0.85 
   5   1   6    6.77    0.90 
   5  -1  -6    6.04    0.74 
   5  -1   7    5.25    0.80 
   5   1   7    4.46    0.75 
   6  -1   0   10.84    0.60 
   6  -1   0   12.60    0.84 
   6   1   0   10.92    0.74 
   6   1   0   11.81    0.71 
   6  -1   1    5.07    0.46 
   6  -1   1    5.50    0.53 
   6   1  -1    4.47    0.59 
   6  -1  -1    6.39    0.79 
   6  -1  -1    4.86    0.37 
   6   1   1    4.92    0.51 
   6   1   1    4.48    0.56 
   6   1  -2    4.32    0.59 
   6  -1   2    4.25    0.47 
   6  -1   2    5.36    0.60 
   6   1   2    5.02    0.68 
   6  -1  -2    4.04    0.56 
   6   1   2    4.12    0.57 
   6  -1   3    0.75    0.35 
   6   1  -3    0.80    0.35 
   6  -1  -3    0.99    0.36 
   6   1   3    1.01    0.36 
   6   1  -4    3.27    0.54 
   6  -1   4    5.07    0.77 
   6  -1  -4    3.48    0.61 
   6   1   4    4.91    0.76 
   6  -1   5    0.02    0.21 
   6   1  -5   -0.10    0.24 
   6   1   5   -0.03    0.21 
   6  -1  -5   -0.09    0.22 
   6   1  -6    1.43    0.45 
   6  -1   6    1.24    0.43 
   6   1   6    1.09    0.43 
   6  -1  -6    0.71    0.40 
   6  -1   7    0.10    0.28 
   6   1  -7    0.08    0.33 
   6   1   7   -0.01    0.34 
   6  -1  -7    0.26    0.34 
   7   1   0    0.22    0.26 
   7   1   0    0.19    0.18 
   7  -1   0    0.13    0.23 
   7  -1   0    0.06    0.16 
   7   1  -1    0.39    0.29 
   7  -1   1    0.00    0.19 
   7  -1   1    0.15    0.19 
   7  -1  -1    0.20    0.16 
   7  -1  -1    0.06    0.28 
   7   1   1    0.16    0.24 
   7   1   1   -0.16    0.18 
   7  -1   2    1.51    0.37 
   7  -1   2    0.57    0.32 
   7   1  -2    0.40    0.30 
   7   1   2    0.85    0.33 
   7  -1  -2    1.29    0.37 
   7   1   2    1.36    0.40 
   7  -1   3    1.77    0.43 
   7   1  -3    1.52    0.43 
   7  -1  -3    2.06    0.51 
   7   1   3    1.18    0.36 
   7   1  -4    1.59    0.49 
   7  -1   4    1.35    0.43 
   7  -1  -4    1.85    0.46 
   7   1   4    1.73    0.44 
   7  -1   5    0.12    0.26 
   7   1  -5   -0.33    0.28 
   7  -1  -5    0.09    0.30 
   7   1   5   -0.07    0.27 
   7  -1   6    0.28    0.33 
   7   1  -6    0.82    0.40 
   7   1   6    0.86    0.42 
   7  -1  -6    0.80    0.38 
   7  -1   7   -0.17    0.28 
   7   1  -7    0.21    0.31 
   7   1   7    0.08    0.34 
   7  -1  -7   -0.19    0.27 
   8  -1   0   83.69    1.97 
   8  -1   0   80.09    1.61 
   8   1   0   79.19    1.91 
   8   1   0   76.88    1.69 
   8  -1   1    1.03    0.31 
   8  -1   1    1.09    0.33 
   8   1  -1    0.93    0.37 
   8   1   1    1.29    0.32 
   8  -1  -1    1.01    0.41 
   8   1   1    0.60    0.27 
   8  -1  -1    1.21    0.31 
   8   1  -2   64.36    2.04 
   8  -1   2   70.16    1.78 
   8  -1   2   66.45    1.93 
   8   1   2   65.50    1.87 
   8   1   2   65.22    1.80 
   8  -1  -2   63.01    1.90 
   8  -1   3    5.27    0.76 
   8   1  -3    3.07    0.54 
   8  -1  -3    3.94    0.63 
   8   1   3    4.02    0.64 
   8   1  -4   35.27    1.46 
   8  -1   4   35.52    1.63 
   8  -1  -4   34.78    1.52 
   8   1   4   35.04    1.60 
   8   1  -5    0.38    0.31 
   8  -1   5    0.23    0.30 
   8   1   5    0.68    0.37 
   8  -1  -5    0.34    0.31 
   8   1  -6   14.41    1.07 
   8  -1   6   14.82    1.11 
   8  -1  -6   16.00    1.11 
   8   1   6   16.29    1.22 
   9  -1   0    0.32    0.28 
   9  -1   0    0.16    0.21 
   9   1   0    0.19    0.23 
   9   1   0    0.06    0.23 
   9  -1   1    1.36    0.38 
   9   1  -1    1.01    0.37 
   9  -1   1    1.57    0.37 
   9   1   1    1.58    0.40 
   9   1   1    1.34    0.39 
   9  -1  -1    1.17    0.42 
   9   1  -2    3.96    0.57 
   9  -1   2    3.59    0.57 
   9  -1  -2    5.16    0.72 
   9   1   2    3.75    0.56 
   9   1   2    5.09    0.68 
   9  -1   3    4.71    0.68 
   9   1  -3    3.92    0.60 
   9  -1  -3    4.26    0.63 
   9   1   3    4.59    0.71 
   9   1  -4    8.32    0.81 
   9  -1   4    8.22    0.85 
   9  -1  -4    7.80    0.84 
   9   1   4    8.32    0.80 
   9   1  -5    4.41    0.64 
   9  -1   5    4.54    0.81 
   9  -1  -5    5.27    0.75 
   9   1   5    3.67    0.64 
   9   1  -6   11.30    0.94 
   9  -1   6    8.98    0.99 
   9   1   6    9.63    1.01 
   9  -1  -6    9.33    0.91 
  10   1   0    2.63    0.43 
  10   1   0    2.61    0.49 
  10  -1   0    2.61    0.47 
  10  -1   1    2.71    0.47 
  10   1  -1    2.82    0.54 
  10  -1   1    2.62    0.46 
  10  -1  -1    2.77    0.51 
  10   1   1    2.95    0.51 
  10   1   1    2.73    0.47 
  10  -1   2    1.14    0.43 
  10   1  -2    0.32    0.33 
  10   1   2    1.39    0.40 
  10  -1  -2    1.24    0.38 
  10   1  -3    1.55    0.42 
  10  -1   3    2.00    0.52 
  10   1   3    1.81    0.46 
  10  -1  -3    1.62    0.46 
  10  -1   4    2.78    0.61 
  10   1  -4    1.92    0.49 
  10   1   4    2.13    0.53 
  10  -1  -4    2.28    0.54 
  10  -1   5    0.19    0.33 
  10   1  -5    0.18    0.33 
  10  -1  -5    0.11    0.30 
  10   1   5    0.25    0.33 
  10   1  -6    0.02    0.32 
  10  -1   6    0.41    0.37 
  10  -1  -6    0.41    0.37 
  10   1   6    0.29    0.37 
  11  -1   0   -0.01    0.22 
  11   1   0    0.22    0.25 
  11   1  -1    0.36    0.28 
  11  -1   1   -0.04    0.22 
  11  -1   1   -0.02    0.20 
  11   1   1    0.52    0.29 
  11   1   1   -0.10    0.22 
  11  -1  -1    0.34    0.27 
  11  -1   2    0.66    0.34 
  11   1  -2    0.62    0.36 
  11  -1  -2    1.36    0.41 
  11   1   2    0.47    0.29 
  11  -1   3    0.36    0.31 
  11   1  -3    0.08    0.25 
  11   1   3    0.26    0.26 
  11  -1  -3    0.29    0.29 
  11  -1   4    2.10    0.52 
  11   1  -4    1.55    0.46 
  11   1   4    2.02    0.58 
  11  -1  -4    2.56    0.57 
  11   1  -5   -0.05    0.27 
  11  -1   5    0.12    0.30 
  11   1   5    0.21    0.31 
  11  -1  -5    0.47    0.35 
  12   1   0   68.21    2.01 
  12  -1   0   68.31    1.94 
  12   1  -1    1.56    0.42 
  12   1   1    0.93    0.41 
  12  -1  -1    2.81    0.61 
  12  -1   2   62.21    1.92 
  12   1  -2   61.85    1.97 
  12   1   2   59.46    1.87 
  12  -1  -2   60.32    1.88 
  12  -1   3    0.33    0.32 
  12   1  -3    0.30    0.30 
  12   1   3    0.39    0.30 
  12  -1  -3    0.38    0.31 
  12  -1   4   33.18    1.49 
  12   1  -4   30.41    1.42 
  12   1   4   34.63    1.55 
  12  -1  -4   32.70    1.46 
  12  -1   5    0.01    0.33 
  12   1  -5    0.55    0.35 
  12  -1  -5    0.04    0.29 
  12   1   5    0.46    0.36 
  13  -1   0   -0.10    0.24 
  13   1   0    0.06    0.26 
  13   1  -1    0.30    0.28 
  13  -1  -1    0.15    0.25 
  13   1  -2    1.85    0.46 
  13  -1  -2    1.79    0.42 
  13   1  -3    1.48    0.43 
  13  -1   3    1.72    0.46 
  13  -1  -3    1.81    0.46 
  13   1   3    1.65    0.50 
  13  -1   4    6.36    0.85 
  13   1  -4    6.29    0.79 
  13   1   4    7.25    0.82 
  13  -1  -4    7.70    0.78 
  14  -1   0    0.45    0.33 
  14   1   0    0.29    0.31 
  14   1  -1    1.49    0.42 
  14  -1  -1    1.49    0.44 
  14   1  -2   -0.14    0.23 
  14   1  -3    0.21    0.28 
  14  -1  -3    0.81    0.38 
  15   1  -1    0.38    0.28 
  15  -1  -1   -0.22    0.27 
  15   1  -2    1.46    0.51 
  15  -1  -2    0.72    0.41 
   0  -2   0    0.74    0.35 
   0   2   0    0.20    0.18 
   0   2   1    0.31    0.16 
   0  -2   1    0.20    0.13 
   0   2  -1    0.10    0.11 
   0   2   1    0.20    0.15 
   0   2   2    0.18    0.17 
   0  -2   2    0.01    0.15 
   0   2  -2    0.02    0.12 
   0   2   2    0.12    0.15 
   0   2  -3   -0.03    0.16 
   0   2   3    0.07    0.18 
   0  -2   3   -0.16    0.18 
   0   2  -4    2.59    0.38 
   0   2   4    2.03    0.42 
   0  -2  -4    2.72    0.41 
   0  -2   4    4.48    0.75 
   0  -2   5    0.44    0.32 
   0  -2  -5    0.22    0.23 
   0   2  -5    0.13    0.20 
   0   2   5    0.02    0.20 
   0   2   6    5.41    0.74 
   0  -2   6    5.06    0.68 
  -1   2   0    0.02    0.08 
   1   2   0   -0.02    0.09 
   1  -2   0    0.03    0.09 
  -1   2   1    1.03    0.22 
   1  -2   1    1.14    0.23 
  -1   2   1    1.13    0.19 
   1   2  -1    1.32    0.24 
   1   2   1    1.50    0.31 
   1   2   1    1.30    0.26 
  -1  -2   1    0.97    0.21 
  -1   2   2    6.47    0.52 
   1  -2   2    5.32    0.52 
  -1   2   2    6.54    0.45 
   1   2  -2    6.39    0.51 
   1   2   2    5.03    0.41 
   1   2   2    6.46    0.55 
  -1  -2   2    6.31    0.44 
  -1   2  -2    6.46    0.31 
   1  -2   3    1.06    0.33 
   1   2  -3    1.63    0.33 
  -1   2   3    1.46    0.36 
   1   2   3    2.03    0.34 
   1  -2  -3    1.19    0.39 
   1   2   3    1.08    0.32 
  -1   2  -3    2.12    0.27 
  -1  -2   3    2.23    0.39 
  -1   2   4    0.65    0.28 
  -1  -2  -4    1.11    0.30 
   1   2  -4    1.07    0.31 
   1  -2   4    0.51    0.30 
  -1   2  -4    0.57    0.21 
   1   2   4    0.56    0.30 
   1  -2  -4    0.69    0.29 
  -1  -2   4    0.37    0.24 
   1   2  -5    3.99    0.55 
   1  -2   5    1.87    0.57 
  -1  -2  -5    3.56    0.60 
  -1   2   5    2.01    0.42 
   1   2   5    1.68    0.43 
  -1  -2   5    2.73    0.46 
   1  -2  -5    2.87    0.49 
  -1   2   6    0.50    0.30 
   1  -2   6    0.06    0.29 
  -1  -2   6    1.39    0.37 
   1  -2   7    0.09    0.31 
   1   2   7    0.06    0.26 
   2   2   0    4.01    0.37 
   2  -2   0    4.62    0.32 
   2   2   0    4.06    0.36 
   2   2  -1    0.10    0.19 
   2  -2   1    0.14    0.16 
  -2  -2   1    0.10    0.16 
   2   2   1    0.35    0.25 
   2   2   1    0.39    0.35 
   2  -2  -1    0.18    0.25 
  -2   2   2    5.75    0.37 
   2  -2   2    5.58    0.54 
   2   2  -2    6.36    0.52 
   2   2   2    5.71    0.50 
  -2  -2   2    6.38    0.41 
   2  -2  -2    6.15    0.56 
   2   2   2    6.88    0.60 
   2   2  -3    0.39    0.25 
  -2   2   3    1.02    0.26 
   2  -2   3    0.26    0.22 
   2   2   3    1.33    0.27 
   2   2   3    0.82    0.33 
   2  -2  -3    0.71    0.29 
  -2  -2   3    1.03    0.28 
   2  -2   4    2.03    0.49 
   2   2  -4    2.14    0.42 
  -2   2   4    1.86    0.37 
   2   2   4    1.33    0.37 
   2  -2  -4    2.47    0.43 
  -2   2  -4    2.34    0.29 
  -2  -2   4    2.24    0.39 
  -2   2   5    2.67    0.44 
   2   2  -5    3.05    0.48 
   2  -2   5    2.92    0.58 
  -2  -2   5    2.38    0.43 
   2  -2  -5    3.23    0.52 
   2   2   5    2.96    0.62 
   2  -2   6    0.23    0.31 
   2  -2  -6    0.04    0.24 
   2   2   6   -0.12    0.22 
   2  -2   7    4.02    0.79 
   2   2   7    2.78    0.59 
   3   2   0    0.28    0.20 
   3  -2   0    0.11    0.18 
   3  -2   0   -0.48    0.10 
   3   2   0    0.06    0.14 
   3   2  -1    1.58    0.32 
   3  -2   1    1.39    0.28 
   3  -2   1    2.31    0.25 
  -3  -2   1    2.05    0.55 
   3   2   1    2.13    0.41 
   3  -2  -1    2.24    0.35 
   3   2   1    2.26    0.38 
   3   2  -2    0.17    0.22 
   3  -2   2    0.00    0.18 
  -3   2   2    0.50    0.15 
   3  -2  -2    0.09    0.20 
   3   2   2    0.00    0.23 
   3   2   2   -0.16    0.13 
  -3  -2   2    0.13    0.11 
   3   2  -3   -0.09    0.17 
   3  -2   3    0.12    0.19 
  -3   2   3    0.09    0.13 
   3  -2  -3    0.19    0.24 
  -3  -2   3    0.07    0.13 
   3   2   3    0.15    0.21 
   3   2   3    0.01    0.13 
   3   2  -4    3.84    0.60 
   3  -2   4    2.19    0.50 
  -3   2   4    3.88    0.43 
  -3  -2   4    3.57    0.40 
   3   2   4    4.18    0.66 
   3  -2  -4    2.96    0.50 
   3  -2   5    0.54    0.34 
   3   2  -5    0.74    0.34 
   3  -2  -5    0.27    0.26 
   3   2   5    0.70    0.42 
   3   2  -6    3.80    0.63 
   3  -2   6    1.69    0.47 
   3   2   6    3.12    0.58 
   3  -2  -6    4.22    0.63 
   3  -2   7    0.29    0.38 
   3   2   7   -0.16    0.24 
   4  -2   0    0.52    0.24 
   4  -2   0    0.64    0.18 
   4   2   0    0.46    0.20 
   4   2   0    0.64    0.24 
   4  -2   1    0.38    0.20 
   4   2  -1    0.12    0.21 
   4  -2   1    0.25    0.16 
   4  -2  -1    0.34    0.23 
   4   2   1    0.16    0.21 
  -4  -2   1    0.48    0.54 
   4   2   1    0.14    0.23 
   4  -2   2    0.10    0.19 
   4   2  -2    0.21    0.23 
   4   2   2    0.29    0.33 
   4   2   2    0.34    0.24 
   4  -2  -2    0.07    0.19 
   4  -2   3    1.55    0.43 
   4   2  -3    1.67    0.45 
   4   2   3    1.40    0.29 
   4   2   3    2.14    0.48 
  -4  -2   3    1.69    0.22 
   4  -2  -3    1.64    0.40 
   4   2  -4    0.85    0.35 
   4  -2   4    1.31    0.40 
  -4  -2   4    0.80    0.23 
   4  -2  -4    0.88    0.40 
   4   2   4    0.72    0.34 
   4   2  -5    0.63    0.32 
   4  -2   5    0.31    0.26 
   4   2   5    0.43    0.35 
   4  -2  -5    0.00    0.25 
   4  -2   6    2.70    0.53 
   4   2  -6    2.37    0.51 
   4   2   6    1.76    0.48 
   4  -2  -6    2.25    0.54 
   4  -2   7    0.22    0.40 
   4   2   7   -0.33    0.23 
   5  -2   0    0.07    0.14 
   5   2   0   -0.04    0.20 
   5  -2   0    0.26    0.20 
   5   2   0    0.15    0.20 
   5  -2   1    4.75    0.46 
   5  -2   1    3.73    0.37 
   5   2  -1    3.41    0.50 
   5  -2  -1    4.22    0.52 
   5   2   1    3.93    0.48 
   5   2   1    4.01    0.52 
  -5  -2   1    3.16    0.45 
   5  -2   2    0.18    0.21 
   5  -2   2    0.19    0.22 
   5   2  -2    0.10    0.24 
   5   2   2    0.39    0.45 
   5  -2  -2    0.12    0.23 
   5   2   2    0.37    0.26 
   5  -2   3    6.25    0.84 
   5   2  -3    5.13    0.64 
   5   2   3    4.88    0.65 
   5  -2  -3    5.33    0.67 
   5   2   3    5.11    0.53 
   5  -2   4    2.59    0.52 
   5   2  -4    1.22    0.38 
   5  -2  -4    0.72    0.36 
   5   2   4    0.80    0.34 
   5  -2   5    2.58    0.54 
   5   2  -5    2.99    0.54 
   5  -2  -5    2.01    0.48 
   5   2   5    2.99    0.58 
   5   2  -6    0.23    0.27 
   5  -2   6   -0.31    0.19 
   5  -2  -6    0.12    0.24 
   5   2   6    0.34    0.30 
   5  -2   7    0.84    0.41 
   5   2   7    0.33    0.36 
   5  -2  -7    1.87    0.75 
   6   2   0    2.02    0.39 
   6  -2   0    2.61    0.36 
   6  -2   0    3.40    0.45 
   6   2   0    2.79    0.42 
   6  -2   1    1.95    0.34 
   6   2  -1    1.89    0.42 
   6  -2   1    2.18    0.41 
  -6  -2   1    1.91    0.39 
   6   2   1    1.66    0.38 
   6  -2  -1    2.18    0.24 
   6   2   1    2.26    0.41 
   6  -2  -1    1.36    0.39 
   6   2  -2    2.66    0.49 
   6  -2   2    4.05    0.57 
   6  -2   2    3.29    0.40 
   6   2   2    4.01    0.56 
   6  -2  -2    3.90    0.58 
   6   2   2    3.62    0.55 
   6  -2   3    0.07    0.23 
   6   2  -3   -0.15    0.23 
   6   2   3   -0.07    0.31 
   6  -2  -3    0.15    0.28 
   6   2   3    0.04    0.22 
   6  -2   4    0.39    0.32 
   6   2  -4    0.14    0.24 
   6  -2  -4    0.44    0.34 
   6   2   4    0.15    0.25 
   6   2  -5    0.98    0.39 
   6  -2   5    1.38    0.43 
   6   2   5    0.94    0.39 
   6  -2  -5    1.68    0.46 
   6   2  -6    0.14    0.29 
   6  -2   6    0.13    0.30 
   6  -2  -6    0.23    0.32 
   6   2   6   -0.43    0.20 
   6  -2   7    1.52    0.47 
   6   2   7    1.82    0.52 
   6  -2  -7    2.48    0.54 
   7  -2   0    0.19    0.17 
   7   2   0   -0.17    0.18 
   7   2   0    0.21    0.25 
   7  -2   0   -0.18    0.21 
   7   2  -1    1.12    0.39 
   7  -2   1    1.67    0.34 
   7  -2   1    1.32    0.34 
  -7  -2   1    1.32    0.40 
   7  -2  -1    1.86    0.25 
   7  -2  -1    1.68    0.40 
   7   2   1    0.98    0.38 
   7   2   1    1.85    0.39 
   7  -2   2    3.27    0.44 
   7  -2   2    3.34    0.53 
   7   2  -2    2.57    0.50 
   7   2   2    3.82    0.63 
   7  -2  -2    4.38    0.62 
   7   2   2    3.39    0.53 
   7   2  -3    0.18    0.26 
   7  -2   3    0.12    0.26 
   7  -2  -3    0.34    0.30 
   7   2   3    0.50    0.33 
   7  -2   4    4.39    0.73 
   7   2  -4    4.81    0.65 
   7   2   4    5.17    0.73 
   7  -2  -4    3.97    0.63 
   7   2  -5    0.19    0.29 
   7  -2   5    0.13    0.25 
   7  -2  -5   -0.02    0.24 
   7   2   5    0.11    0.27 
   7  -2   6    3.78    0.66 
   7   2  -6    2.85    0.54 
   7  -2  -6    4.52    0.68 
   7   2   6    3.90    0.70 
   7  -2   7   -0.11    0.31 
   7   2  -7    0.22    0.33 
   7  -2  -7    0.68    0.41 
   7   2   7    0.07    0.32 
   8  -2   0    2.64    0.43 
   8   2   0    2.93    0.46 
   8   2   0    2.20    0.44 
   8  -2   0    1.93    0.42 
   8  -2   1    2.32    0.45 
   8  -2   1    2.86    0.46 
   8   2  -1    2.55    0.53 
  -8  -2   1    2.85    0.49 
   8   2   1    3.38    0.58 
   8   2   1    2.86    0.55 
   8  -2  -1    2.88    0.53 
   8   2  -2    1.97    0.46 
   8  -2   2    1.73    0.42 
   8  -2   2    2.25    0.46 
   8  -2  -2    1.74    0.45 
   8   2   2    1.59    0.43 
   8   2   2    2.81    0.60 
   8   2  -3    1.16    0.40 
   8  -2   3    0.80    0.37 
   8   2   3    0.47    0.30 
   8  -2  -3    0.99    0.34 
   8   2  -4    0.27    0.30 
   8  -2   4    0.04    0.26 
   8   2   4    0.17    0.29 
   8  -2  -4    0.28    0.30 
   8  -2   5    0.32    0.34 
   8   2  -5   -0.30    0.21 
   8   2   5    0.31    0.30 
   8  -2  -5   -0.17    0.25 
   8   2  -6   -0.15    0.28 
   8  -2   6    0.63    0.38 
   8   2   6    0.42    0.31 
   8  -2  -6    0.23    0.33 
   9   2   0    0.18    0.25 
   9   2   0   -0.36    0.16 
   9  -2   0   -0.06    0.23 
   9  -2   0    0.01    0.19 
   9  -2   1    0.14    0.20 
   9  -2   1    0.24    0.24 
   9   2  -1    0.38    0.33 
   9   2   1    0.15    0.25 
   9   2   1    0.03    0.22 
   9  -2  -1    0.10    0.27 
   9  -2   2    0.61    0.34 
   9   2  -2    0.44    0.31 
   9  -2  -2    0.28    0.29 
   9   2   2    0.09    0.30 
   9   2   2    0.40    0.30 
   9   2  -3    2.92    0.56 
   9  -2   3    4.78    0.70 
   9   2   3    4.02    0.66 
   9  -2  -3    4.24    0.67 
   9  -2   4    0.30    0.32 
   9   2  -4    0.23    0.29 
   9  -2  -4    0.01    0.29 
   9   2   4    0.33    0.30 
   9  -2   5    4.30    0.72 
   9   2  -5    3.84    0.64 
   9   2   5    4.30    0.72 
   9  -2  -5    4.41    0.67 
   9  -2   6   -0.12    0.28 
   9   2  -6   -0.19    0.26 
   9   2   6   -0.13    0.29 
   9  -2  -6   -0.24    0.27 
  10   2   0    4.39    0.63 
  10   2   0    5.45    0.63 
  10  -2   0    4.83    0.62 
  10  -2   1    5.01    0.64 
  10   2  -1    4.25    0.61 
  10  -2   1    4.07    0.53 
  10   2   1    4.51    0.59 
  10   2   1    4.43    0.57 
  10  -2  -1    6.17    0.76 
  10  -2   2    2.79    0.50 
  10   2  -2    2.90    0.52 
  10  -2  -2    2.32    0.48 
  10   2   2    2.68    0.51 
  10  -2   3    1.07    0.43 
  10   2  -3    1.05    0.42 
  10   2   3    1.75    0.48 
  10  -2  -3    1.91    0.49 
  10   2  -4    0.33    0.31 
  10  -2   4    0.31    0.32 
  10   2   4    1.23    0.46 
  10  -2  -4    0.25    0.29 
  10   2  -5   -0.15    0.24 
  10  -2   5    0.28    0.39 
  10   2   5    0.26    0.32 
  10  -2  -5    0.23    0.32 
  10   2  -6    0.27    0.30 
  10  -2   6    0.15    0.33 
  10  -2  -6    0.35    0.33 
  10   2   6   -0.03    0.32 
  11   2   0   -0.03    0.25 
  11  -2   0    0.03    0.40 
  11  -2   1    0.03    0.21 
  11  -2   1    0.37    0.26 
  11   2  -1   -0.02    0.25 
  11  -2  -1    0.16    0.27 
  11   2   1    0.01    0.25 
  11   2   1    0.39    0.32 
  11   2  -2    3.02    0.57 
  11  -2   2    2.97    0.56 
  11  -2  -2    3.60    0.61 
  11   2   2    3.10    0.54 
  11  -2   3    0.37    0.34 
  11   2  -3    0.15    0.26 
  11   2   3    0.10    0.27 
  11  -2  -3    0.50    0.31 
  11  -2   4    8.19    0.90 
  11   2  -4    4.28    0.63 
  11   2   4    5.08    0.78 
  11  -2  -4    5.52    0.78 
  11   2  -5   -0.12    0.28 
  11  -2   5    0.05    0.30 
  11   2   5    0.08    0.30 
  11  -2  -5    0.10    0.32 
  12  -2   0    9.87    0.81 
  12   2   0   11.85    0.85 
  12   2  -1    3.36    0.58 
  12   2   1    2.58    0.51 
  12  -2  -1    3.83    0.59 
  12   2  -2    3.77    0.60 
  12  -2   2    3.98    0.61 
  12   2   2    4.71    0.64 
  12  -2  -2    4.82    0.64 
  12   2  -3    1.38    0.45 
  12  -2   3    0.78    0.37 
  12  -2  -3    1.56    0.43 
  12   2   3    1.35    0.44 
  12   2  -4    0.94    0.37 
  12  -2   4    1.28    0.45 
  12   2   4    1.76    0.46 
  12  -2  -4    1.09    0.37 
  12  -2   5   -0.18    0.31 
  12   2  -5   -0.10    0.29 
  12  -2  -5   -0.05    0.24 
  12   2   5    0.23    0.32 
  13   2   0    0.36    0.29 
  13   2  -1    0.86    0.42 
  13  -2  -1    0.65    0.32 
  13   2  -2   -0.10    0.26 
  13  -2  -2   -0.06    0.25 
  13  -2   3    4.12    0.69 
  13   2  -3    2.93    0.59 
  13  -2  -3    3.52    0.61 
  13   2   3    3.38    0.59 
  13  -2   4   -0.03    0.30 
  13   2  -4    0.11    0.24 
  13  -2  -4    0.11    0.29 
  13   2   4   -0.03    0.28 
  14   2   0    4.10    0.61 
  14  -2   0    3.14    0.73 
  14   2  -1    6.76    0.70 
  14  -2  -1    7.72    0.73 
  14   2  -2    1.84    0.48 
  14   2  -3    2.99    0.54 
  14  -2  -3    3.59    0.62 
  15   2  -1    0.23    0.32 
  15  -2  -1   -0.09    0.25 
  15   2  -2    2.85    0.58 
  15  -2  -2    1.90    0.47 
   0   3   0    0.13    0.26 
   0  -3   0   -0.50    0.33 
   0   3   1    7.08    0.49 
   0   3  -1    7.26    0.38 
   0  -3   1    7.18    0.51 
   0   3   1    7.21    0.56 
   0   3   2   -0.06    0.14 
   0  -3   2   -0.06    0.15 
   0   3   2    0.17    0.17 
   0   3  -2    0.02    0.13 
   0   3  -3   14.42    0.61 
   0   3   3   14.92    0.80 
   0   3   3   15.35    0.86 
   0  -3   3   14.61    0.85 
   0   3   4   -0.09    0.20 
   0   3  -4   -0.12    0.18 
   0  -3   4    0.36    0.27 
   0  -3  -4   -0.07    0.20 
   0  -3  -5    4.02    0.50 
   0   3   5    3.49    0.57 
   0  -3   5    3.45    0.59 
   0   3   6   -0.22    0.18 
   0  -3   6    0.03    0.22 
   0  -3   7    2.07    0.65 
  -1   3   0    0.12    0.12 
   1   3   0   -0.01    0.16 
  -1  -3   0   -0.10    0.18 
   1  -3   0   -0.08    0.13 
  -1   3   1    0.01    0.15 
  -1   3   1    0.33    0.20 
   1   3  -1    0.12    0.16 
   1  -3   1   -0.07    0.13 
   1   3   1   -0.16    0.27 
  -1   3  -1    0.26    0.21 
  -1  -3   1    0.19    0.19 
   1   3   1    0.10    0.19 
  -1   3   2    0.37    0.17 
   1  -3   2    0.98    0.32 
  -1   3   2    0.55    0.25 
   1   3  -2    1.03    0.26 
  -1  -3   2    0.47    0.20 
   1   3   2    0.66    0.25 
  -1   3  -2    0.34    0.13 
   1   3   2    0.37    0.22 
  -1   3   3    0.06    0.19 
   1   3  -3    0.11    0.19 
   1  -3   3    0.23    0.23 
   1   3   3    0.08    0.25 
  -1   3  -3    0.15    0.13 
  -1  -3   3    0.36    0.19 
   1   3   3    0.11    0.17 
   1   3  -4    7.87    0.59 
  -1   3   4    8.29    0.66 
   1  -3   4    7.35    0.68 
   1   3   4    7.79    0.71 
   1  -3  -4    8.20    0.69 
  -1  -3   4    9.42    0.76 
  -1   3  -4    7.55    0.46 
   1  -3   5    0.56    0.32 
   1   3  -5    1.18    0.34 
  -1   3   5    0.57    0.31 
  -1  -3  -5    0.12    0.20 
   1   3   5    0.87    0.37 
  -1  -3   5    0.79    0.33 
   1  -3  -5    0.38    0.24 
  -1   3   6    7.88    0.74 
   1  -3   6    7.24    0.85 
  -1  -3   6    6.84    0.69 
   1   3   6   11.10    0.88 
   1  -3   7    0.10    0.29 
   1   3   7    0.10    0.25 
   2   3   0   37.14    0.97 
   2   3   0   36.20    1.09 
  -2   3   0   36.37    0.84 
   2  -3   0   36.54    0.89 
  -2   3   1   16.63    0.76 
   2  -3   1   14.61    0.77 
   2   3  -1   17.75    0.75 
  -2   3  -1   16.59    0.36 
   2   3   1   15.95    1.13 
  -2  -3   1   17.44    0.92 
   2  -3  -1   17.05    0.97 
   2   3   1   16.49    0.81 
  -2   3   2   34.32    1.22 
   2   3  -2   34.90    1.11 
  -2   3   2   34.98    0.92 
   2  -3   2   33.70    1.24 
   2   3   2   34.56    1.29 
   2   3  -3   10.19    0.69 
   2  -3   3   11.02    0.84 
  -2   3   3    9.81    0.62 
   2   3   3    9.27    0.64 
   2  -3  -3   11.79    0.81 
   2   3   3   10.97    0.83 
  -2  -3   3   12.11    0.70 
   2  -3   4    7.63    0.77 
  -2   3   4    7.15    0.58 
   2   3  -4    7.83    0.68 
   2   3   4    6.98    0.73 
   2  -3  -4    6.67    0.65 
  -2  -3   4    7.48    0.61 
   2   3   4    7.86    0.57 
   2  -3   5    3.19    0.65 
  -2   3   5    3.47    0.51 
   2   3  -5    3.88    0.55 
   2  -3  -5    3.73    0.56 
   2   3   5    4.39    0.70 
  -2  -3   5    4.15    0.55 
   2  -3   6    1.23    0.42 
   2   3   6    0.57    0.35 
   2  -3  -6    1.57    0.42 
   2  -3   7    0.23    0.36 
   2   3   7   -0.11    0.28 
   3   3   0    0.20    0.21 
   3  -3   0    0.24    0.20 
   3  -3   0   -0.42    0.12 
   3   3   0   -0.07    0.18 
   3   3  -1    1.46    0.35 
   3  -3   1    1.99    0.38 
   3  -3   1    2.09    0.23 
  -3  -3   1    1.08    0.50 
   3  -3  -1    1.38    0.31 
   3   3   1    1.71    0.38 
   3   3   1    1.89    0.40 
   3  -3  -1    1.71    0.22 
   3   3  -2   17.31    0.93 
   3  -3   2   15.26    0.91 
   3  -3  -2   14.95    0.61 
   3   3   2   16.16    1.00 
   3  -3  -2   17.33    0.92 
  -3  -3   2   15.58    0.61 
   3   3   2   15.50    1.03 
   3   3  -3    1.58    0.40 
   3  -3   3    1.02    0.35 
  -3   3   3    1.51    0.26 
   3   3   3    1.37    0.31 
  -3  -3   3    0.78    0.20 
   3   3   3    0.60    0.30 
   3  -3  -3    0.83    0.30 
   3  -3   4   11.51    0.94 
  -3   3   4   10.50    0.64 
   3   3  -4   11.27    0.77 
   3  -3  -4   11.36    0.84 
  -3  -3   4   10.96    0.66 
   3   3   4   14.83    1.14 
   3   3   4   10.22    0.62 
   3  -3   5    3.73    0.66 
   3   3  -5    3.39    0.49 
   3  -3  -5    2.92    0.54 
  -3  -3   5    3.98    0.77 
   3   3   5    3.77    0.64 
   3   3  -6    6.72    0.71 
   3  -3   6    6.54    0.89 
   3  -3  -6    6.53    0.81 
   3   3   6    7.51    0.82 
   3  -3   7    4.89    0.79 
   3   3   7    2.94    0.60 
   4  -3   0    0.59    0.19 
   4   3   0    0.66    0.26 
   4   3   0    0.58    0.25 
   4  -3   0    1.01    0.28 
   4  -3   1   10.65    0.49 
   4  -3   1   10.25    0.67 
   4   3  -1   11.48    0.76 
   4  -3  -1   10.87    0.35 
  -4  -3   1   11.21    1.29 
   4   3   1   11.04    0.76 
   4   3   1    9.22    0.64 
   4  -3  -1   11.52    0.72 
   4   3  -2    2.80    0.45 
   4  -3   2    2.65    0.46 
  -4  -3   2    2.33    0.27 
   4   3   2    3.88    0.61 
   4   3   2    3.62    0.82 
   4  -3  -2    2.54    0.45 
   4   3  -3    2.62    0.46 
   4  -3   3    2.65    0.53 
  -4  -3   3    2.92    0.29 
   4   3   3    2.70    0.43 
   4   3   3    3.28    0.59 
   4  -3  -3    2.21    0.47 
   4  -3   4    0.03    0.26 
   4   3  -4   -0.05    0.22 
   4   3   4    0.00    0.25 
  -4  -3   4    0.06    0.16 
   4  -3  -4   -0.14    0.24 
   4  -3   5    5.34    0.76 
   4   3  -5    4.03    0.60 
   4  -3  -5    4.51    0.63 
   4   3   5    4.22    0.66 
   4  -3   6    0.59    0.35 
   4   3  -6   -0.08    0.28 
   4   3   6    0.10    0.28 
   4  -3  -6    1.08    0.37 
   4  -3   7    2.30    0.57 
   4   3   7    1.49    0.53 
   5  -3   0    0.17    0.15 
   5  -3   0    0.36    0.23 
   5   3   0   -0.14    0.17 
   5   3   0    0.15    0.23 
   5   3  -1    2.65    0.47 
   5  -3   1    2.90    0.36 
   5  -3   1    1.86    0.36 
   5  -3  -1    1.35    0.36 
   5   3   1    1.90    0.44 
   5  -3  -1    1.84    0.18 
   5   3   1    2.20    0.43 
  -5  -3   1    1.83    0.41 
   5  -3   2    1.70    0.37 
   5   3  -2    1.81    0.40 
   5  -3  -2    1.95    0.44 
   5   3   2    1.95    0.57 
   5   3   2    1.93    0.41 
   5  -3   3    1.20    0.41 
   5   3  -3    0.83    0.34 
   5  -3  -3    0.33    0.28 
   5   3   3    1.25    0.45 
   5   3   3    0.52    0.33 
   5  -3   4    1.70    0.49 
   5   3  -4    1.71    0.42 
   5   3   4    2.71    0.52 
   5  -3  -4    1.65    0.45 
   5  -3   5    1.64    0.47 
   5   3  -5    1.99    0.46 
   5  -3  -5    1.04    0.41 
   5   3   5    2.06    0.50 
   5  -3   6    1.81    0.52 
   5   3  -6    1.84    0.50 
   5  -3  -6    1.82    0.47 
   5   3   6    3.37    0.66 
   5  -3   7    0.42    0.34 
   5  -3  -7    0.43    0.36 
   5   3   7    0.00    0.29 
   6   3   0   26.35    1.13 
   6  -3   0   26.36    0.91 
   6  -3   0   27.12    1.13 
   6   3   0   26.95    1.15 
   6  -3   1   83.30    1.55 
   6   3  -1   83.25    2.00 
   6  -3   1   83.10    1.94 
   6  -3  -1   84.37    1.96 
   6   3   1   84.18    1.93 
   6   3   1   83.82    1.95 
   6  -3  -1   83.93    1.09 
  -6  -3   1   82.17    1.91 
   6  -3   2   12.55    0.88 
   6   3  -2   12.20    0.85 
   6  -3   2   12.56    0.58 
   6   3   2   12.12    0.93 
   6   3   2   13.35    0.90 
   6  -3  -2   14.06    0.93 
   6  -3   3   38.97    1.58 
   6   3  -3   38.72    1.49 
   6  -3  -3   39.23    1.48 
   6   3   3   39.39    1.57 
   6   3   3   38.33    1.69 
   6   3  -4    5.49    0.70 
   6  -3   4    6.84    1.00 
   6  -3  -4    6.64    0.71 
   6   3   4    4.26    0.64 
   6   3  -5   12.10    0.85 
   6  -3   5   12.95    1.06 
   6  -3  -5   12.25    0.99 
   6   3   5   10.59    0.94 
   6   3  -6    0.22    0.30 
   6  -3   6    0.39    0.26 
   6  -3  -6    0.38    0.34 
   6   3   6    0.47    0.29 
   6  -3   7    6.82    0.90 
   6  -3  -7    7.82    0.77 
   6   3   7    6.66    0.91 
   7   3   0    0.11    0.22 
   7  -3   0    0.29    0.18 
   7   3   0    0.05    0.23 
   7  -3   0   -0.13    0.20 
   7  -3   1    0.01    0.19 
   7  -3   1    0.14    0.21 
   7   3  -1    0.26    0.28 
   7  -3  -1    0.52    0.33 
  -7  -3   1   -0.01    0.28 
   7   3   1    0.33    0.24 
   7  -3  -1    0.02    0.14 
   7   3   1    0.23    0.25 
   7  -3   2    3.24    0.58 
   7   3  -2    2.51    0.47 
   7  -3   2    3.72    0.43 
   7  -3  -2    4.21    0.62 
   7   3   2    3.48    0.58 
   7   3   2    2.56    0.50 
   7  -3   3    7.53    0.77 
   7   3  -3    7.31    0.74 
   7   3   3    6.20    0.79 
   7  -3  -3    6.42    0.80 
   7   3  -4    9.02    0.74 
   7  -3   4    8.25    0.84 
   7  -3  -4    9.19    0.82 
   7   3   4    9.16    0.80 
   7  -3   5    4.91    0.82 
   7   3  -5    5.38    0.72 
   7   3   5    4.54    0.70 
   7  -3  -5    5.90    0.77 
   7   3  -6    8.17    0.80 
   7  -3   6    6.33    0.88 
   7  -3  -6    7.95    0.87 
   7   3   6    9.39    0.93 
   7   3  -7    7.02    0.80 
   7  -3   7    5.76    0.94 
   7  -3  -7    5.72    0.71 
   7   3   7    6.26    0.94 
   8   3   0    0.90    0.35 
   8  -3   0    1.04    0.30 
   8  -3   0    1.13    0.38 
   8   3   0    1.04    0.35 
   8  -3   1    1.30    0.35 
   8  -3   1    0.94    0.29 
   8   3  -1    1.40    0.42 
  -8  -3   1    1.41    0.45 
   8  -3  -1    1.33    0.40 
   8   3   1    2.18    0.44 
   8   3   1    1.58    0.42 
   8   3  -2    1.88    0.43 
   8  -3   2    1.93    0.43 
   8  -3  -2    1.61    0.49 
   8   3   2    2.51    0.58 
   8   3   2    1.85    0.48 
   8   3  -3    2.73    0.51 
   8  -3   3    4.03    0.67 
   8  -3  -3    3.80    0.66 
   8   3   3    2.47    0.55 
   8   3  -4    0.57    0.33 
   8  -3   4    0.89    0.38 
   8  -3  -4    0.07    0.29 
   8   3   4    0.54    0.34 
   8   3  -5    1.62    0.44 
   8  -3   5    1.79    0.49 
   8   3   5    1.23    0.47 
   8  -3  -5    0.74    0.37 
   8  -3   6   -0.35    0.24 
   8   3  -6   -0.30    0.22 
   8  -3  -6    0.14    0.31 
   8   3   6   -0.05    0.23 
   9  -3   0   -0.14    0.22 
   9   3   0    0.31    0.26 
   9   3   0    0.04    0.26 
   9  -3   0    0.12    0.16 
   9  -3   1    3.30    0.49 
   9  -3   1    3.18    0.49 
   9   3  -1    2.16    0.44 
   9  -3  -1    2.25    0.52 
   9   3   1    3.03    0.57 
   9   3   1    3.83    0.58 
   9  -3   2    0.39    0.31 
   9   3  -2    0.37    0.30 
   9  -3  -2   -0.05    0.23 
   9   3   2    0.16    0.25 
   9   3   2    0.34    0.38 
   9  -3   3    1.58    0.45 
   9   3  -3    1.10    0.40 
   9   3   3    1.49    0.43 
   9  -3  -3    1.44    0.44 
   9   3  -4    0.47    0.34 
   9  -3   4    0.39    0.32 
   9  -3  -4    0.29    0.31 
   9   3   4    0.04    0.26 
   9   3  -5    3.91    0.64 
   9  -3   5    3.43    0.68 
   9   3   5    3.04    0.61 
   9  -3  -5    3.45    0.61 
   9   3  -6    1.22    0.51 
   9  -3   6    0.59    0.42 
   9   3   6    0.58    0.42 
   9  -3  -6    0.68    0.39 
  10   3   0    9.65    0.81 
  10  -3   0    9.98    0.80 
  10   3   0    9.04    0.73 
  10  -3   1   65.47    1.69 
  10   3  -1   65.72    1.88 
  10  -3   1   65.52    1.69 
  10   3   1   66.07    1.86 
  10   3   1   64.39    1.89 
  10  -3  -1   66.84    1.82 
  10   3  -2    5.29    0.70 
  10  -3   2    5.68    0.64 
  10  -3  -2    5.36    0.71 
  10   3   2    5.83    0.64 
  10   3  -3   50.43    1.73 
  10  -3   3   49.17    1.82 
  10  -3  -3   49.82    1.73 
  10   3   3   48.30    1.79 
  10  -3   4    3.05    0.64 
  10   3  -4    2.78    0.53 
  10   3   4    3.02    0.60 
  10  -3  -4    3.43    0.62 
  10  -3   5   26.74    1.46 
  10   3  -5   26.11    1.33 
  10   3   5   27.21    1.44 
  10  -3  -5   27.25    1.43 
  10   3  -6    0.52    0.38 
  10  -3   6    0.45    0.38 
  10  -3  -6    0.41    0.40 
  10   3   6    0.27    0.38 
  11  -3   0    0.16    0.26 
  11   3   0    0.23    0.27 
  11  -3   1    0.88    0.32 
  11  -3   1    0.70    0.33 
  11   3  -1    2.27    0.49 
  11  -3  -1    2.15    0.46 
  11   3   1    0.69    0.33 
  11   3   1    1.85    0.44 
  11   3  -2    2.23    0.46 
  11  -3   2    1.95    0.45 
  11  -3  -2    3.21    0.61 
  11   3   2    1.83    0.48 
  11   3  -3    2.65    0.52 
  11  -3   3    3.03    0.57 
  11  -3  -3    3.09    0.55 
  11   3   3    3.26    0.58 
  11  -3   4    3.14    0.56 
  11   3  -4    2.98    0.58 
  11  -3  -4    2.18    0.48 
  11   3   4    3.28    0.67 
  11   3  -5    6.57    0.81 
  11  -3   5    8.90    0.97 
  11  -3  -5    5.88    0.81 
  11   3   5    6.47    0.87 
  12  -3   0    3.91    0.55 
  12   3   0    4.98    0.67 
  12   3  -1    0.43    0.29 
  12   3   1    0.57    0.32 
  12  -3  -1    0.24    0.30 
  12  -3   2    0.53    0.34 
  12   3  -2    0.80    0.36 
  12  -3  -2    0.07    0.23 
  12   3   2    0.70    0.38 
  12   3  -3   -0.91    0.24 
  12  -3   3    0.13    0.27 
  12   3   3    0.35    0.31 
  12  -3  -3    0.31    0.29 
  12   3  -4    0.41    0.29 
  12  -3   4    0.23    0.30 
  12   3   4    0.24    0.31 
  12  -3  -4    0.23    0.26 
  13   3   0   -0.10    0.25 
  13  -3   0    0.01    0.23 
  13   3  -1    0.15    0.27 
  13  -3  -1    0.19    0.29 
  13   3  -2   -0.01    0.26 
  13  -3  -2    0.25    0.29 
  13  -3   3    2.20    0.50 
  13  -3  -3    2.50    0.53 
  13   3   3    3.05    0.57 
  13  -3   4    0.22    0.30 
  13   3  -4   -0.06    0.23 
  13   3   4   -0.03    0.43 
  13  -3  -4    0.19    0.31 
  14   3   0    2.74    0.51 
  14   3  -1   46.70    1.69 
  14  -3  -1   46.07    1.57 
  14   3  -2    2.55    0.54 
  14  -3  -2    3.03    0.56 
  14   3  -3   34.51    1.48 
  14   3   3   33.05    2.17 
  14  -3  -3   32.73    1.43 
  15   3  -1    0.29    0.30 
  15  -3  -1    0.68    0.38 
   0   4   0   23.28    1.16 
   0  -4   0   22.99    1.39 
   0   4  -1    5.18    0.44 
   0  -4   1    5.74    0.57 
   0   4   1    6.86    0.56 
   0   4   1    3.15    0.48 
   0   4  -2   37.41    0.89 
   0   4   2   39.35    1.24 
   0  -4   2   36.85    1.28 
   0   4   2   37.28    1.28 
   0   4  -3    0.58    0.20 
   0  -4   3    1.47    0.40 
   0   4   3    0.54    0.31 
   0   4   3    0.30    0.20 
   0   4   4    1.65    0.41 
   0   4  -4    2.40    0.36 
   0  -4   4    2.96    0.63 
   0  -4   5   -0.08    0.27 
   0  -4  -5    0.07    0.22 
   0   4   5    0.08    0.21 
   0   4   6    9.21    0.79 
   0  -4   6    7.79    0.73 
   0  -4   7    0.12    0.33 
   1   4   0   -0.20    0.18 
  -1   4   0    0.10    0.20 
  -1  -4   0   -0.03    0.29 
   1  -4   0   -0.09    0.27 
   1   4  -1   25.70    0.81 
   1  -4   1   25.73    0.99 
  -1   4   1   24.47    0.93 
   1   4   1   23.57    1.24 
   1   4   1   25.59    0.95 
   1  -4  -1   25.59    1.00 
  -1  -4   1   24.97    1.05 
  -1   4  -1   25.05    1.03 
   1   4  -2    9.12    0.52 
  -1   4   2   10.10    0.60 
   1  -4   2    9.54    0.69 
  -1   4   2   11.49    0.76 
  -1   4  -2    9.42    0.38 
   1   4   2    9.33    0.67 
  -1  -4   2    8.85    0.61 
   1   4   2    8.80    0.65 
  -1   4   3  109.72    2.01 
   1  -4   3  109.14    2.44 
  -1   4   3  109.36    2.27 
   1   4   3  109.35    2.27 
  -1  -4   3  109.68    2.14 
   1   4   3  109.07    2.17 
  -1   4  -3  110.43    1.35 
   1  -4   4   30.96    1.37 
  -1   4   4   29.32    1.10 
   1   4  -4   28.50    1.00 
  -1   4  -4   30.33    0.81 
  -1  -4   4   30.70    1.22 
   1   4   4   31.26    1.32 
   1  -4  -4   29.49    1.19 
   1   4   4   29.75    1.12 
   1   4  -5   92.16    1.78 
  -1  -4  -5   90.48    1.85 
  -1   4   5   93.35    2.08 
   1  -4   5   92.13    2.37 
   1   4   5   90.93    2.39 
   1  -4  -5   92.05    2.02 
  -1  -4   5   91.28    2.23 
   1  -4   6   20.06    1.25 
  -1   4   6   19.89    1.09 
   1   4   6   21.76    1.08 
  -1  -4   6   22.60    1.20 
   1  -4   7   64.53    2.22 
   1   4   7   64.03    2.04 
   2   4   0    4.47    0.47 
  -2  -4   0    6.21    0.61 
   2  -4   0    6.47    0.54 
  -2   4   0    6.10    0.49 
  -2   4   1  948.96    5.67 
   2  -4   1  949.19    6.14 
   2   4  -1  945.06    5.34 
   2   4   1  945.51    6.46 
  -2  -4   1  948.21    7.21 
  -2   4  -1  947.19    3.28 
   2   4   1  942.56    8.14 
   2  -4  -1  947.43    7.16 
  -2   4   2    1.45    0.35 
   2  -4   2    0.45    0.25 
  -2   4   2    1.58    0.29 
   2   4  -2    1.22    0.30 
   2   4   2    1.47    0.36 
   2   4   2    0.89    0.31 
  -2  -4   2    1.55    0.27 
  -2   4   3  606.69    4.15 
   2   4  -3  606.02    4.80 
   2  -4   3  600.78    6.15 
   2   4   3  601.71    5.83 
  -2  -4   3  611.48    4.83 
   2   4   3  605.66    4.97 
   2   4  -4    0.31    0.25 
  -2   4   4    0.09    0.19 
   2  -4   4    0.14    0.25 
   2  -4  -4    0.09    0.27 
  -2  -4   4    0.53    0.34 
   2   4   4    0.19    0.24 
   2   4   4    0.45    0.29 
   2  -4   5  257.05    4.43 
   2   4  -5  257.81    3.30 
  -2   4   5  261.85    3.17 
   2  -4  -5  262.62    3.53 
   2   4   5  258.63    4.14 
  -2  -4   5  257.87    3.44 
   2  -4   6    0.41    0.30 
   2  -4  -6    0.22    0.26 
   2   4   6    0.01    0.23 
   2  -4   7   72.68    2.38 
   2   4   7   70.11    2.16 
   3  -4   0   -0.10    0.14 
   3   4   0    0.12    0.19 
  -3   4   0    0.07    0.14 
   3   4   0    0.06    0.24 
   3  -4   1   15.37    0.48 
   3  -4   1   15.80    0.80 
  -3   4   1   14.75    0.78 
   3   4  -1   15.71    0.75 
   3  -4  -1   15.34    0.64 
   3   4   1   18.85    1.11 
  -3  -4   1   16.56    1.51 
   3   4   1   16.85    0.87 
   3  -4   2   14.84    0.91 
   3   4  -2   16.37    0.88 
   3   4   2   14.89    1.17 
  -3  -4   2   14.61    0.71 
   3  -4  -2   13.84    0.74 
   3   4   2   13.28    0.86 
  -3   4   3   76.68    1.54 
   3  -4   3   76.41    2.16 
   3   4  -3   79.18    1.92 
   3  -4  -3   74.24    2.00 
  -3  -4   3   82.80    1.71 
   3   4   3   76.93    2.18 
   3   4   3   75.76    1.87 
   3   4  -4   20.11    1.05 
   3  -4   4   19.98    1.21 
  -3   4   4   19.99    0.88 
   3   4   4   19.77    0.89 
   3  -4  -4   20.04    1.07 
  -3  -4   4   20.58    0.86 
   3   4   4   21.21    1.18 
   3   4  -5   74.51    1.88 
   3  -4   5   75.59    2.33 
   3   4   5   76.61    2.31 
  -3  -4   5   76.40    1.87 
   3  -4  -5   73.08    2.00 
   3  -4   6   20.67    1.23 
   3  -4  -6   18.59    1.05 
   3   4   6   20.72    1.24 
   3  -4   7   49.12    1.98 
   3   4   7   52.51    2.02 
   4   4   0   42.95    1.40 
   4  -4   0   42.62    1.09 
   4   4   0   42.11    1.26 
   4  -4   0   42.71    1.15 
   4   4  -1   11.32    0.79 
   4  -4   1   11.44    0.69 
   4  -4   1   12.15    0.51 
  -4  -4   1   11.39    1.29 
   4  -4  -1   12.91    0.78 
   4  -4  -1   11.33    0.44 
   4   4   1   12.77    0.84 
   4   4   1   11.55    0.78 
   4   4  -2    6.94    0.64 
   4  -4   2    5.60    0.57 
  -4  -4   2    6.01    0.43 
   4   4   2    4.93    0.94 
   4   4   2    5.89    0.64 
   4  -4  -2    6.29    0.64 
   4   4  -3    4.72    0.63 
   4  -4   3    4.12    0.66 
   4   4   3    5.14    0.62 
   4  -4  -3    4.29    0.47 
   4   4   3    4.58    0.70 
   4  -4  -3    5.05    0.64 
  -4  -4   3    5.13    0.39 
   4   4  -4    0.87    0.35 
   4  -4   4    1.21    0.41 
   4   4   4    0.70    0.32 
  -4  -4   4    1.08    0.26 
   4   4   4    0.60    0.46 
   4  -4  -4    0.30    0.29 
   4  -4   5    2.78    0.58 
   4   4  -5    2.43    0.48 
   4   4   5    2.18    0.56 
   4  -4  -5    2.65    0.53 
   4   4  -6    6.72    0.78 
   4  -4   6    5.52    0.88 
   4  -4  -6    6.49    0.69 
   4   4   6    7.08    0.93 
   4  -4   7    0.54    0.33 
   4   4   7    0.33    0.38 
   5   4   0    0.42    0.26 
   5  -4   0    0.10    0.13 
   5  -4   0    0.03    0.17 
   5   4   0    0.34    0.26 
   5   4  -1   23.46    1.13 
   5  -4   1   22.60    0.99 
   5  -4   1   23.22    0.80 
  -5  -4   1   21.10    1.25 
   5   4   1   24.38    1.18 
   5  -4  -1   22.07    0.99 
   5   4   1   21.57    1.05 
   5  -4  -1   22.98    0.59 
   5  -4   2   13.34    0.84 
   5   4  -2   14.92    0.95 
  -5  -4   2   12.90    0.64 
   5   4   2   13.58    0.93 
   5  -4  -2   13.35    0.85 
   5   4   2   14.10    1.23 
   5   4  -3   62.16    1.75 
   5  -4   3   60.54    1.99 
   5  -4  -3   61.37    1.77 
  -5  -4   3   62.00    1.01 
   5   4   3   67.30    2.10 
   5   4   3   60.18    1.88 
   5   4  -4   18.86    1.03 
   5  -4   4   17.47    1.18 
   5  -4  -4   20.19    1.14 
   5   4   4   19.98    1.17 
   5  -4   5   88.05    2.60 
   5   4  -5   88.40    2.18 
   5  -4  -5   91.32    2.35 
   5   4   5   85.62    2.46 
   5   4  -6   17.02    1.03 
   5  -4   6   19.38    1.24 
   5   4   6   17.08    1.17 
   5  -4  -6   18.47    1.13 
   5  -4   7   64.53    2.40 
   5   4   7   61.17    2.20 
   5  -4  -7   65.26    2.05 
   6  -4   0    0.68    0.26 
   6  -4   0    0.51    0.18 
   6   4   0    1.57    0.42 
   6   4   0    0.89    0.32 
   6  -4   1  607.53    5.11 
   6   4  -1  608.74    5.51 
   6  -4   1  607.40    4.34 
   6   4   1  606.10    5.61 
   6  -4  -1  608.72    2.97 
  -6  -4   1  609.65    5.09 
   6   4   1  601.10    5.33 
   6  -4  -1  609.31    5.15 
   6  -4   2    0.67    0.24 
   6   4  -2    0.38    0.28 
   6  -4   2    0.02    0.21 
   6   4   2    0.78    0.42 
   6  -4  -2    0.57    0.31 
   6   4   2    0.10    0.23 
   6  -4   3  397.19    5.11 
   6   4  -3  401.19    4.67 
   6   4   3  403.33    5.54 
   6   4   3  400.89    5.19 
   6  -4  -3  399.40    4.55 
   6  -4   4   -0.16    0.22 
   6   4  -4    0.14    0.27 
   6  -4  -4    0.24    0.29 
   6   4   4    0.30    0.28 
   6   4  -5  178.24    3.15 
   6  -4   5  183.91    3.76 
   6   4   5  182.11    3.78 
   6  -4  -5  190.81    3.44 
   6   4  -6    0.16    0.29 
   6  -4   6    0.48    0.33 
   6   4   6    0.18    0.29 
   6  -4  -6   -0.20    0.28 
   6  -4   7   53.03    2.10 
   6   4   7   51.97    2.04 
   6  -4  -7   55.46    1.85 
   7   4   0    0.22    0.29 
   7  -4   0   -0.10    0.22 
   7  -4   0    0.19    0.17 
   7   4   0    0.29    0.23 
   7  -4   1    4.92    0.49 
   7   4  -1    4.11    0.59 
   7  -4   1    4.79    0.48 
   7  -4  -1    3.90    0.33 
   7   4   1    4.73    0.64 
  -7  -4   1    5.19    0.69 
   7   4   1    3.90    0.55 
   7  -4  -1    4.23    0.55 
   7  -4   2    7.47    0.55 
   7  -4   2    6.62    0.69 
   7   4  -2    5.62    0.70 
   7   4   2    6.41    0.71 
   7   4   2    6.86    0.84 
   7  -4  -2    7.07    0.74 
   7   4  -3   28.22    1.28 
   7  -4   3   26.72    1.38 
   7  -4  -3   29.00    1.36 
   7   4   3   30.29    1.42 
   7  -4   4   15.50    1.19 
   7   4  -4   13.15    0.95 
   7  -4  -4   12.37    0.94 
   7   4   4   14.44    1.05 
   7  -4   5   35.60    1.69 
   7   4  -5   32.94    1.36 
   7   4   5   38.43    1.74 
   7  -4  -5   35.11    1.52 
   7  -4   6    8.32    0.88 
   7   4  -6    6.76    0.70 
   7   4   6    7.71    0.84 
   7  -4  -6    8.23    0.84 
   7   4  -7   24.38    1.26 
   7  -4   7   21.11    1.29 
   7  -4  -7   24.38    1.25 
   7   4   7   27.96    1.53 
   8   4   0    3.13    0.53 
   8  -4   0    2.89    0.43 
   8  -4   0    2.17    0.42 
   8   4   0    1.89    0.43 
   8  -4   1   15.05    0.87 
   8  -4   1   16.68    0.75 
   8   4  -1   16.94    1.01 
   8   4   1   16.89    1.01 
   8   4   1   16.35    0.97 
  -8  -4   1   17.70    1.12 
   8  -4  -1   18.15    1.01 
   8  -4   2    2.67    0.54 
   8   4  -2    4.71    0.77 
   8   4   2    2.02    0.47 
   8   4   2    2.74    0.55 
   8  -4  -2    3.21    0.54 
   8   4  -3   11.51    0.90 
   8  -4   3   11.16    0.91 
   8  -4  -3   11.77    0.93 
   8   4   3   11.46    0.92 
   8   4  -4    0.32    0.28 
   8  -4   4    0.35    0.31 
   8  -4  -4    0.44    0.34 
   8   4   4    0.52    0.35 
   8   4  -5    3.70    0.59 
   8  -4   5    4.23    0.79 
   8   4   5    2.25    0.52 
   8  -4  -5    3.44    0.62 
   8   4  -6    4.20    0.68 
   8  -4   6    4.37    0.77 
   8   4   6    5.25    0.78 
   8  -4  -6    3.98    0.70 
   9   4   0    0.00    0.25 
   9  -4   0    0.03    0.24 
   9   4   0    0.09    0.28 
   9  -4   0    0.02    0.16 
   9  -4   1    4.51    0.54 
   9   4  -1    4.81    0.66 
   9  -4   1    4.10    0.58 
   9   4   1    3.95    0.61 
   9  -4  -1    3.78    0.61 
   9   4   1    4.37    0.60 
   9  -4   2    4.54    0.65 
   9   4  -2    5.73    0.71 
   9   4   2    5.86    0.75 
   9  -4  -2    5.16    0.70 
   9   4   2    7.01    0.93 
   9  -4   3   35.29    1.56 
   9   4  -3   35.28    1.45 
   9   4   3   35.56    1.49 
   9  -4  -3   35.78    1.50 
   9  -4   4   10.52    0.96 
   9   4  -4   11.59    0.91 
   9   4   4   12.39    0.99 
   9  -4  -4   11.05    1.00 
   9   4  -5   48.50    1.75 
   9  -4   5   48.03    1.87 
   9  -4  -5   49.65    1.83 
   9   4   5   48.78    1.91 
   9   4  -6    7.87    0.77 
   9  -4   6    8.05    0.91 
   9  -4  -6    6.91    0.86 
   9   4   6    6.65    0.88 
  10   4   0    0.21    0.24 
  10  -4   0    0.09    0.27 
  10   4   0    0.52    0.30 
  10  -4   1  279.69    3.38 
  10   4  -1  278.32    3.91 
  10  -4   1  279.71    3.48 
  10   4   1  281.52    3.91 
  10   4   1  283.13    4.01 
  10  -4  -1  279.96    3.84 
  10  -4   2    0.23    0.27 
  10   4  -2    0.04    0.23 
  10   4   2    0.34    0.28 
  10   4   2    0.18    0.46 
  10  -4  -2    0.30    0.32 
  10  -4   3  182.00    3.30 
  10   4  -3  182.53    3.22 
  10   4   3  181.92    3.39 
  10  -4  -3  182.42    3.24 
  10   4  -4    0.17    0.30 
  10  -4   4    0.46    0.34 
  10  -4  -4   -0.18    0.27 
  10   4   4    0.33    0.33 
  10  -4   5   86.09    2.52 
  10   4  -5   85.43    2.33 
  10  -4  -5   85.20    2.39 
  10   4   5   85.88    2.55 
  11   4   0    0.32    0.26 
  11  -4   0   -0.12    0.23 
  11   4  -1    1.50    0.45 
  11  -4   1    0.82    0.34 
  11  -4   1    1.43    0.38 
  11   4   1    1.39    0.37 
  11  -4  -1    1.69    0.42 
  11   4   1    1.05    0.42 
  11   4  -2    2.19    0.47 
  11  -4   2    2.23    0.47 
  11   4   2    2.30    0.47 
  11  -4  -2    3.14    0.58 
  11  -4   3    6.15    0.78 
  11   4  -3    7.85    0.75 
  11   4   3    7.64    0.78 
  11  -4  -3    7.33    0.77 
  11  -4   4    4.43    0.76 
  11   4  -4    3.62    0.58 
  11  -4  -4    5.05    0.70 
  11   4   4    3.51    0.63 
  11  -4   5   11.38    0.95 
  11   4  -5   10.08    0.88 
  11  -4  -5   10.62    0.89 
  11   4   5   11.00    0.92 
  12   4   0    0.35    0.30 
  12  -4   0    1.36    0.39 
  12   4  -1   18.64    1.14 
  12  -4  -1   16.80    1.01 
  12   4   1    9.85    1.06 
  12  -4   2    0.58    0.31 
  12   4  -2    0.51    0.30 
  12  -4  -2    0.39    0.28 
  12   4   2    0.27    0.31 
  12  -4   3    7.23    0.70 
  12   4  -3   12.33    0.90 
  12   4   3    8.68    0.90 
  12  -4  -3    9.48    0.83 
  12   4  -4    0.63    0.34 
  12  -4   4    0.59    0.42 
  12  -4  -4    0.46    0.34 
  12   4   4    0.59    0.38 
  13   4   0   -0.50    0.24 
  13  -4   0    0.44    0.27 
  13   4  -1    2.68    0.53 
  13  -4  -1    2.19    0.46 
  13   4  -2    1.37    0.40 
  13   4   2    1.22    0.66 
  13  -4  -2    1.37    0.43 
  13   4  -3   19.32    1.12 
  13  -4   3   14.85    1.02 
  13  -4  -3   15.89    1.02 
  13   4   3   17.23    1.11 
  13  -4   4    3.21    0.63 
  13   4  -4    2.22    0.49 
  13  -4  -4    2.47    0.48 
  13   4   4    2.91    0.62 
  14   4   0    0.69    0.36 
  14   4  -1   91.57    2.31 
  14  -4  -1   92.05    2.25 
  14   4  -2   -0.27    0.22 
  14  -4  -2   -0.01    0.31 
  14   4  -3   59.50    1.90 
  14   4   3   58.66    2.19 
  14  -4  -3   64.44    2.04 
  15   4   0    0.05    0.38 
  15   4  -1    0.52    0.35 
  15  -4  -1    0.24    0.32 
   0   5   0    0.11    0.37 
   0  -5   0   -0.32    0.51 
   0   5   1   13.21    0.83 
   0   5  -1   15.05    0.70 
   0  -5   1   15.02    0.93 
   0   5   1   14.75    0.89 
   0   5  -2    0.18    0.15 
   0  -5   2    0.11    0.19 
   0   5   2    0.16    0.22 
   0   5   2    0.09    0.19 
   0   5   3   15.42    0.85 
   0   5  -3   16.31    0.66 
   0  -5   3   16.51    0.93 
   0   5   3   16.55    0.94 
   0   5   4   -0.31    0.18 
   0   5   4   -0.12    0.19 
   0  -5   4    0.36    0.27 
   0   5  -4    0.08    0.17 
   0   5   5    6.35    0.68 
   0  -5   5    4.97    0.73 
   0  -5  -5    5.99    0.66 
   0   5   6    0.07    0.25 
   0  -5   6   -0.34    0.22 
   0  -5   7    0.79    0.45 
  -1   5   0    0.25    0.24 
  -1  -5   0    0.39    0.47 
   1   5   0    0.17    0.27 
   1  -5   0   -0.27    0.38 
   1  -5   1    0.71    0.30 
  -1   5   1    0.35    0.23 
   1   5  -1    0.56    0.23 
  -1  -5   1    0.73    0.34 
   1  -5  -1    0.76    0.37 
  -1   5  -1    0.89    0.40 
   1   5   1    0.37    0.25 
   1   5   1    0.58    0.44 
  -1   5   2    9.57    0.64 
   1  -5   2   10.55    0.75 
  -1   5   2    8.69    0.69 
   1   5  -2    9.83    0.57 
  -1  -5   2    9.47    0.68 
  -1   5  -2   10.67    0.51 
   1   5   2   10.58    0.72 
   1   5   2    9.87    0.79 
  -1   5   3    7.01    0.71 
   1   5  -3    6.92    0.52 
  -1   5   3    6.91    0.64 
   1  -5   3    6.29    0.64 
  -1   5  -3    6.01    0.38 
  -1  -5   3    5.68    0.53 
   1   5   3    7.01    0.66 
   1   5   3    5.54    0.70 
   1   5  -4    0.04    0.21 
   1  -5   4    0.10    0.25 
  -1   5   4    0.28    0.27 
   1   5   4    0.27    0.28 
  -1   5  -4    0.30    0.18 
   1   5   4    0.29    0.26 
  -1  -5   4    0.36    0.25 
   1   5  -5    1.03    0.31 
  -1  -5  -5    1.36    0.37 
   1  -5   5    1.93    0.47 
  -1   5   5    2.20    0.54 
   1   5   5    1.06    0.38 
   1  -5  -5    1.01    0.34 
  -1  -5   5    1.61    0.44 
  -1   5   6    1.18    0.39 
   1  -5   6    0.84    0.38 
   1  -5  -6    0.90    0.40 
  -1  -5   6    0.86    0.35 
   1   5   6    1.11    0.37 
   1  -5   7    1.39    0.52 
   1   5   7    2.53    0.56 
   2   5   0    4.72    0.58 
  -2  -5   0    4.58    0.61 
   2  -5   0    4.51    0.58 
  -2   5   0    4.31    0.45 
  -2   5   1   18.64    0.91 
   2   5  -1   19.03    0.83 
   2  -5   1   20.37    0.97 
   2  -5  -1   19.86    1.47 
  -2   5  -1   19.90    0.64 
   2   5   1   18.36    1.42 
   2   5   1   21.94    1.03 
  -2  -5   1   19.75    1.34 
   2   5  -2    1.13    0.29 
   2  -5   2    0.89    0.30 
  -2   5   2    0.54    0.26 
   2   5   2    0.66    0.27 
   2   5   2    1.65    0.48 
  -2  -5   2    1.55    0.39 
   2   5  -3    7.34    0.59 
  -2   5   3    7.96    0.79 
   2  -5   3   10.23    0.84 
  -2   5   3    8.42    0.63 
   2   5   3    8.78    0.77 
   2   5   3    7.47    0.67 
  -2  -5   3    8.61    0.65 
   2   5  -4    0.49    0.27 
  -2   5   4    0.27    0.23 
   2  -5   4    0.29    0.29 
   2  -5  -4    0.09    0.25 
   2   5   4   -0.19    0.19 
   2   5   4    0.42    0.31 
  -2  -5   4    0.44    0.28 
   2  -5   5    2.32    0.51 
  -2   5   5    2.89    0.52 
   2   5  -5    2.15    0.42 
  -2  -5   5    1.80    0.35 
   2  -5  -5    1.36    0.37 
   2   5   5    2.27    0.48 
   2  -5   6    0.01    0.25 
   2   5   6    0.61    0.32 
   2  -5  -6    0.15    0.31 
   2  -5   7    3.13    0.68 
   2   5   7    1.74    0.57 
   3  -5   0   -0.20    0.14 
  -3   5   0    0.05    0.13 
   3   5   0    0.07    0.21 
  -3   5   1    1.04    0.31 
   3  -5   1    0.77    0.28 
   3   5  -1    0.59    0.24 
   3  -5  -1    0.92    0.33 
   3   5   1    1.84    0.43 
   3   5   1    1.69    0.46 
  -3  -5   1   -0.11    0.60 
   3   5  -2    0.19    0.34 
   3  -5   2    0.23    0.24 
  -3   5   2    0.19    0.23 
   3   5   2    0.43    0.50 
   3   5   2    0.09    0.22 
   3  -5  -2   -0.26    0.23 
  -3  -5   2    0.30    0.21 
   3  -5   3    9.11    0.79 
  -3   5   3    9.97    0.64 
   3   5  -3   10.58    0.73 
   3   5   3   10.74    0.83 
  -3  -5   3   10.80    0.65 
   3   5   3    9.92    0.86 
   3  -5  -3   10.27    0.81 
   3   5  -4    4.39    0.58 
  -3   5   4    4.04    0.52 
   3  -5   4    3.49    0.61 
  -3  -5   4    4.37    0.47 
   3   5   4    3.84    0.60 
   3   5   4    4.70    0.50 
   3  -5  -4    4.52    0.64 
   3   5  -5    9.14    0.71 
   3  -5   5    8.65    0.80 
   3   5   5    8.24    0.81 
  -3  -5   5    8.42    0.75 
   3  -5  -5    9.05    0.85 
   3  -5   6    1.44    0.44 
   3  -5  -6    2.19    0.50 
   3   5   6    3.04    0.57 
   3  -5   7    7.26    0.98 
   3   5   7    5.74    0.82 
   4   5   0   11.75    0.89 
   4  -5   0   11.95    0.63 
   4   5   0   11.71    0.76 
   4  -5   1   17.00    0.84 
   4   5  -1   15.82    0.85 
   4  -5   1   16.70    0.60 
   4  -5  -1   16.22    0.63 
   4   5   1   15.68    1.00 
   4   5   1   18.52    0.98 
  -4  -5   1   18.48    1.55 
   4   5  -2    0.45    0.29 
   4  -5   2    0.79    0.33 
   4   5   2    0.49    0.47 
   4   5   2    0.67    0.31 
   4  -5  -2    0.20    0.23 
   4  -5  -2    0.74    0.28 
  -4  -5   2    0.77    0.25 
   4   5  -3    8.88    0.76 
   4  -5   3   10.46    0.90 
  -4  -5   3    9.96    0.58 
   4   5   3    9.93    0.82 
   4   5   3    9.14    0.95 
   4  -5  -3    9.05    0.70 
   4  -5  -3    8.57    0.78 
   4  -5   4    1.61    0.46 
   4   5  -4    1.25    0.41 
   4   5   4    1.45    0.33 
  -4  -5   4    1.41    0.28 
   4   5   4    2.04    0.54 
   4  -5  -4    1.25    0.40 
   4  -5   5    4.90    0.77 
   4   5  -5    4.04    0.59 
   4   5   5    4.85    0.77 
   4  -5  -5    4.91    0.69 
   4   5  -6   -0.05    0.29 
   4  -5   6   -0.02    0.23 
   4  -5  -6   -0.17    0.26 
   4   5   6   -0.30    0.16 
   4  -5   7    0.44    0.35 
   4   5   7   -0.40    0.25 
   5   5   0   -0.01    0.24 
   5   5   0   -0.26    0.18 
   5  -5   0    0.05    0.18 
   5  -5   0   -0.06    0.10 
   5  -5   1    0.66    0.27 
   5   5  -1    0.37    0.28 
   5  -5   1    0.99    0.26 
   5  -5  -1    0.88    0.19 
  -5  -5   1    0.64    0.46 
   5   5   1    0.28    0.27 
   5  -5  -1    0.55    0.27 
   5   5   1    0.49    0.32 
   5   5  -2    0.51    0.28 
   5  -5   2    0.47    0.28 
   5  -5  -2    0.49    0.27 
   5   5   2    0.61    0.52 
   5   5   2    0.92    0.36 
  -5  -5   2    1.41    0.34 
   5  -5   3    0.93    0.38 
   5   5  -3    0.17    0.25 
  -5  -5   3    0.33    0.17 
   5   5   3    0.38    0.31 
   5   5   3    0.61    0.47 
   5  -5  -3    0.17    0.26 
   5  -5   4    0.48    0.32 
   5   5  -4   -0.04    0.24 
   5   5   4    0.06    0.23 
   5  -5  -4    0.33    0.31 
   5   5  -5    0.08    0.31 
   5  -5   5   -0.07    0.27 
   5   5   5    0.18    0.23 
   5  -5  -5    0.22    0.30 
   5   5  -6   -0.01    0.28 
   5  -5   6    0.25    0.30 
   5   5   6    0.58    0.38 
   5  -5  -6   -0.03    0.27 
   5  -5   7    0.07    0.26 
   5   5   7    0.05    0.31 
   5  -5  -7    0.15    0.30 
   6   5   0    0.90    0.42 
   6  -5   0    0.37    0.25 
   6  -5   0    0.42    0.20 
   6   5   0    0.42    0.30 
   6   5  -1   76.23    2.08 
   6  -5   1   74.55    1.95 
   6  -5   1   72.44    1.50 
   6  -5  -1   67.56    1.85 
   6   5   1   76.46    2.15 
  -6  -5   1   72.84    2.41 
   6  -5  -1   71.72    1.17 
   6   5   1   72.90    2.01 
   6   5  -2    0.88    0.55 
   6  -5   2    0.82    0.32 
   6  -5   2    0.53    0.19 
  -6  -5   2    0.19    0.23 
   6   5   2    0.38    0.24 
   6   5   2    0.38    0.43 
   6  -5  -2    0.27    0.32 
   6   5  -3   41.54    1.49 
   6  -5   3   42.39    1.70 
   6   5   3   41.08    2.09 
   6  -5  -3   39.49    1.47 
   6   5   3   41.17    1.69 
   6   5  -4    0.47    0.31 
   6  -5   4    0.42    0.32 
   6  -5  -4    0.94    0.38 
   6   5   4    0.72    0.33 
   6   5  -5   22.16    1.15 
   6  -5   5   23.50    1.44 
   6   5   5   23.92    1.36 
   6  -5  -5   21.67    1.22 
   6   5  -6    0.22    0.33 
   6  -5   6   -0.64    0.31 
   6  -5  -6    0.21    0.33 
   6   5   6    0.96    0.39 
   6  -5   7    3.76    0.74 
   6   5   7    3.64    0.67 
   6  -5  -7    4.11    0.65 
   7   5   0    0.11    0.28 
   7   5   0   -0.04    0.29 
   7  -5   0    0.17    0.16 
   7  -5   0   -0.07    0.22 
   7  -5   1    1.36    0.33 
   7   5  -1    1.71    0.42 
   7  -5   1    1.72    0.37 
   7  -5  -1    1.92    0.42 
   7   5   1    1.88    0.46 
  -7  -5   1    1.30    0.49 
   7  -5  -1    1.38    0.23 
   7   5   1    1.72    0.39 
   7  -5   2    1.63    0.29 
   7   5  -2    1.48    0.42 
   7  -5   2    1.04    0.33 
   7   5   2    1.55    0.45 
   7   5   2    2.41    0.58 
   7  -5  -2    1.78    0.43 
   7   5  -3    6.14    0.75 
   7  -5   3    4.84    0.68 
   7   5   3    4.92    0.68 
   7  -5  -3    6.44    0.72 
   7   5   3    5.00    1.01 
   7   5  -4    2.00    0.45 
   7  -5   4    2.41    0.61 
   7  -5  -4    2.09    0.52 
   7   5   4    2.03    0.52 
   7   5  -5   12.77    0.87 
   7  -5   5   10.52    0.99 
   7  -5  -5   12.99    0.98 
   7   5   5   11.34    0.95 
   7  -5   6    4.20    0.72 
   7   5  -6    3.07    0.54 
   7   5   6    4.02    0.71 
   7  -5  -6    4.16    0.70 
   8   5   0    5.16    0.71 
   8   5   0    6.65    0.70 
   8  -5   0    6.17    0.69 
   8  -5   0    6.79    0.55 
   8  -5   1    8.66    0.64 
   8  -5   1   10.15    0.75 
   8   5  -1    9.76    0.81 
   8   5   1    8.45    0.75 
   8   5   1    8.92    0.79 
  -8  -5   1    9.35    1.04 
   8  -5  -1    9.73    0.78 
   8   5  -2    2.18    0.45 
   8  -5   2    4.28    0.65 
   8   5   2    2.86    0.60 
   8  -5  -2    2.84    0.54 
   8   5   2    2.06    0.45 
   8  -5   3    4.60    0.76 
   8   5  -3    4.71    0.82 
   8   5   3    4.16    0.73 
   8  -5  -3    4.74    0.65 
   8  -5   4    1.19    0.48 
   8   5  -4    1.16    0.39 
   8   5   4    0.58    0.37 
   8  -5  -4    0.92    0.38 
   8  -5   5    0.18    0.33 
   8   5  -5    1.00    0.39 
   8  -5  -5    0.77    0.39 
   8   5   5    0.18    0.32 
   8   5  -6    0.31    0.28 
   8  -5   6   -0.13    0.25 
   8   5   6    0.18    0.28 
   8  -5  -6   -0.10    0.27 
   9   5   0    0.04    0.20 
   9  -5   0    0.01    0.18 
   9  -5   0    0.32    0.32 
   9   5   0   -0.09    0.25 
   9   5  -1   -0.36    0.17 
   9  -5   1    0.15    0.21 
   9  -5   1    0.09    0.26 
   9  -5  -1   -0.33    0.17 
   9   5   1   -0.01    0.20 
   9   5   1    0.43    0.33 
   9  -5   2    0.63    0.34 
   9   5  -2    0.05    0.23 
   9   5   2   -0.02    0.25 
   9  -5  -2    0.69    0.35 
   9   5   2    0.37    0.31 
   9  -5   3    2.25    0.54 
   9   5  -3    1.56    0.44 
   9   5   3    1.86    0.48 
   9  -5  -3    1.99    0.50 
   9  -5   4    0.81    0.40 
   9   5  -4    1.12    0.42 
   9  -5  -4    0.62    0.38 
   9   5   4    1.58    0.51 
   9  -5   5    1.47    0.46 
   9   5  -5    0.51    0.34 
   9   5   5    0.99    0.41 
   9  -5  -5    0.60    0.36 
   9  -5   6   -0.05    0.32 
   9   5  -6   -0.08    0.27 
   9   5   6    0.40    0.36 
   9  -5  -6    0.21    0.34 
  10   5   0    0.26    0.29 
  10  -5   0    0.44    0.29 
  10   5   0    0.41    0.34 
  10  -5   1   77.37    1.83 
  10  -5   1   77.89    1.83 
  10   5  -1   79.24    2.14 
  10  -5  -1   81.62    2.11 
  10   5   1   74.19    2.03 
  10   5   1   76.80    2.12 
  10  -5   2    0.03    0.26 
  10   5  -2    0.08    0.25 
  10   5   2    0.28    0.33 
  10  -5  -2    0.59    0.30 
  10   5   2   -0.07    0.32 
  10   5  -3   50.16    1.77 
  10  -5   3   48.84    1.76 
  10  -5  -3   46.70    1.78 
  10   5   3   46.81    1.70 
  10  -5   4    0.38    0.33 
  10   5  -4    0.63    0.31 
  10   5   4    0.45    0.32 
  10  -5  -4    0.48    0.33 
  10   5  -5   18.14    1.11 
  10  -5   5   17.80    1.20 
  10  -5  -5   21.10    1.31 
  10   5   5   19.05    1.18 
  11   5   0   -0.05    0.24 
  11  -5   0    0.32    0.25 
  11   5  -1    0.39    0.30 
  11  -5   1    0.46    0.28 
  11   5   1    0.31    0.29 
  11  -5  -1    0.53    0.36 
  11   5   1    0.64    0.33 
  11   5  -2   -1.21    0.25 
  11  -5   2   -0.13    0.22 
  11  -5  -2    0.40    0.29 
  11   5   2    0.24    0.31 
  11  -5   3    4.26    0.64 
  11   5  -3    3.93    0.60 
  11  -5  -3    5.40    0.69 
  11   5   3    4.56    0.66 
  11   5  -4    2.33    0.49 
  11  -5   4    3.63    0.61 
  11  -5  -4    3.00    0.52 
  11   5   4    2.88    0.64 
  11  -5   5    9.45    0.90 
  11   5  -5    8.85    0.81 
  11   5   5   10.58    1.01 
  11  -5  -5    9.35    0.88 
  12  -5   0    2.09    0.47 
  12   5   0    2.40    0.47 
  12   5  -1    2.98    0.54 
  12   5   1    1.71    0.44 
  12   5  -2    3.52    0.60 
  12  -5   2    2.39    0.43 
  12  -5  -2    2.63    0.50 
  12   5   2    2.61    0.53 
  12   5  -3    0.95    0.37 
  12  -5   3    1.95    0.49 
  12  -5  -3    0.56    0.33 
  12   5   3    1.32    0.44 
  12  -5   4    1.19    0.42 
  12   5  -4    0.44    0.33 
  12   5   4    0.94    0.34 
  12  -5  -4    1.05    0.37 
  13  -5   0    0.55    0.48 
  13   5   0    0.44    0.32 
  13   5  -1    0.38    0.34 
  13   5   1    0.00    0.47 
  13  -5  -1    0.06    0.28 
  13   5  -2    0.74    0.36 
  13  -5  -2    0.87    0.34 
  13   5   2    0.37    0.46 
  13   5  -3    0.41    0.38 
  13  -5   3    1.80    0.53 
  13   5   3    1.29    0.43 
  13  -5  -3    2.05    0.47 
  13   5  -4    0.44    0.31 
  13  -5   4    1.10    0.42 
  13   5   4    0.40    0.39 
  13  -5  -4    0.24    0.31 
  14   5   0    0.05    0.28 
  14   5  -1   48.68    1.70 
  14  -5  -1   49.85    1.67 
  14   5  -2    0.48    0.33 
  14  -5  -2    0.96    0.31 
  14   5  -3   35.06    1.47 
  14   5   3   34.63    1.71 
  14  -5  -3   35.16    1.51 
  15   5   0    0.05    0.41 
  15   5  -1    0.77    0.38 
  15  -5  -1    0.62    0.31 
   0   6   0    2.45    0.64 
   0  -6   0    2.74    0.76 
   0   6   1    0.36    0.30 
   0  -6  -1   -0.01    0.28 
   0   6  -1    0.08    0.25 
   0  -6   1    0.10    0.31 
   0   6   2    1.29    0.34 
   0   6  -2    1.37    0.27 
   0  -6   2    1.04    0.35 
   0   6   2    1.85    0.48 
   0   6  -3   -0.12    0.12 
   0   6   3   -0.18    0.20 
   0   6   3   -0.10    0.18 
   0  -6   3   -0.08    0.20 
   0   6   4    3.90    0.72 
   0   6   4    3.09    0.55 
   0  -6   4    2.49    0.51 
   0   6  -4    2.47    0.36 
   0  -6  -5    0.24    0.29 
   0   6   5    0.16    0.28 
   0  -6   5   -0.16    0.22 
   0   6   6    4.38    0.63 
   0  -6   6    5.54    0.75 
   0  -6   7   -0.29    0.27 
  -1  -6   0    0.10    0.43 
   1   6   0    0.28    0.38 
   1  -6   0    0.07    0.63 
  -1   6   0    0.21    0.32 
   1   6  -1    1.80    0.32 
   1  -6   1    2.01    0.46 
  -1   6   1    1.97    0.42 
   1  -6  -1    1.67    0.51 
  -1   6  -1    0.63    0.48 
   1   6   1    2.67    0.70 
   1   6   1    1.97    0.42 
  -1  -6   1    2.36    0.55 
  -1   6   2    0.33    0.24 
   1   6  -2    0.02    0.20 
   1  -6   2    0.05    0.23 
  -1   6   2    0.25    0.28 
  -1  -6   2    0.52    0.27 
  -1   6  -2    0.21    0.20 
   1   6   2    0.01    0.20 
   1   6   2    0.27    0.29 
   1   6  -3    4.61    0.46 
  -1   6   3    4.47    0.64 
   1  -6   3    4.55    0.65 
  -1   6   3    5.29    0.57 
  -1  -6   3    5.00    0.54 
   1   6   3    5.09    0.65 
  -1   6  -3    3.97    0.33 
   1   6   3    4.10    0.56 
  -1   6   4    1.80    0.42 
  -1   6   4    2.24    0.50 
   1  -6   4    2.25    0.49 
   1   6  -4    1.92    0.35 
   1   6   4    2.97    0.55 
   1   6   4    1.87    0.41 
  -1  -6   4    2.57    0.55 
  -1   6  -4    2.53    0.32 
  -1   6   5    0.70    0.30 
   1   6  -5    0.39    0.24 
   1  -6   5    0.47    0.35 
   1   6   5    0.30    0.30 
   1  -6  -5    0.63    0.36 
  -1  -6   5    0.19    0.30 
  -1   6   6   -0.24    0.20 
   1  -6   6    0.43    0.30 
   1   6   6   -0.89    0.29 
   1  -6  -6    0.01    0.27 
  -1  -6   6    0.21    0.25 
   1  -6   7    0.95    0.40 
   1   6   7    1.45    0.45 
   2   6   0    8.70    0.71 
  -2  -6   0    8.02    0.84 
  -2   6   0    8.52    0.55 
   2  -6   0    8.29    0.71 
  -2   6   1    0.07    0.21 
   2  -6   1    0.12    0.21 
   2   6  -1    0.27    0.22 
  -2  -6   1    0.21    0.47 
   2   6   1   -0.08    0.33 
  -2   6  -1    0.31    0.19 
   2  -6  -1    0.30    0.47 
   2   6   1    0.76    0.31 
   2   6  -2    4.27    0.46 
  -2   6   2    3.86    0.56 
   2  -6   2    3.73    0.58 
   2  -6  -2    5.37    0.66 
  -2  -6   2    4.53    0.65 
   2   6   2    5.03    0.85 
  -2   6  -2    4.45    0.47 
   2   6   2    2.97    0.49 
   2  -6   3    1.08    0.33 
  -2   6   3    0.65    0.30 
  -2   6   3    0.42    0.29 
   2   6  -3    0.66    0.27 
  -2  -6   3    1.33    0.35 
   2   6   3    0.72    0.39 
   2   6   3    0.57    0.30 
   2   6  -4    2.44    0.42 
   2  -6   4    2.57    0.56 
  -2   6   4    2.38    0.46 
   2   6   4    3.28    0.60 
   2   6   4    2.96    0.45 
  -2  -6   4    3.09    0.52 
  -2   6   5    3.10    0.54 
   2   6  -5    2.06    0.39 
   2  -6   5    3.09    0.61 
   2  -6  -5    2.91    0.54 
   2   6   5    2.52    0.47 
   2   6   5    3.24    0.60 
  -2  -6   5    2.99    0.48 
   2  -6   6    0.62    0.38 
   2   6   6    0.65    0.39 
   2  -6  -6    0.44    0.36 
   2  -6   7    2.83    0.58 
   2   6   7    3.55    0.61 
   3   6   0    0.19    0.25 
  -3  -6   0   -0.26    0.23 
  -3   6   0    0.06    0.16 
   3  -6   0    0.12    0.22 
   3   6  -1    7.36    0.63 
   3  -6   1    7.36    0.64 
  -3   6   1    7.99    0.63 
  -3   6  -1    7.63    0.43 
   3   6   1    7.69    0.93 
   3  -6  -1    7.35    0.71 
   3   6   1    7.46    0.73 
  -3  -6   1    6.55    1.21 
  -3   6   2    3.17    0.53 
   3   6  -2    2.18    0.41 
   3  -6   2    2.87    0.50 
  -3  -6   2    2.14    0.49 
   3  -6  -2    2.15    0.52 
   3   6   2    3.69    0.87 
   3   6   2    3.22    0.59 
   3   6  -3    1.85    0.41 
   3  -6   3    1.49    0.40 
  -3   6   3    1.36    0.38 
   3   6   3    2.34    0.56 
   3  -6  -3    1.83    0.36 
  -3  -6   3    1.77    0.35 
   3   6   3    1.13    0.36 
   3   6  -4    1.27    0.39 
  -3   6   4    1.39    0.34 
   3  -6   4    1.06    0.37 
  -3  -6   4    1.38    0.36 
   3   6   4    1.25    0.36 
   3  -6  -4    0.27    0.31 
   3   6   4    1.03    0.36 
   3  -6   5    0.39    0.33 
   3   6  -5    0.70    0.31 
   3  -6  -5   -0.05    0.28 
  -3  -6   5    0.45    0.29 
   3   6   5    0.48    0.32 
   3  -6   6    0.74    0.35 
   3   6   6    1.59    0.42 
   3  -6  -6    0.22    0.32 
   3  -6   7    0.14    0.28 
   3   6   7    0.56    0.37 
  -4   6   0    0.17    0.16 
   4   6   0    0.12    0.24 
   4  -6   0    0.42    0.25 
   4  -6   1    1.93    0.38 
   4   6  -1    1.69    0.35 
  -4   6   1    2.88    0.50 
  -4  -6   1    1.46    0.74 
   4   6   1    1.21    0.47 
   4  -6  -1    2.38    0.36 
   4   6   1    2.74    0.54 
   4  -6   2    0.60    0.30 
   4   6  -2    0.46    0.27 
   4   6   2    0.77    0.35 
   4  -6  -2    0.71    0.34 
  -4  -6   2    0.64    0.34 
   4   6   2    0.54    0.54 
   4  -6   3    0.39    0.29 
   4   6  -3    0.46    0.31 
   4  -6  -3    0.01    0.31 
   4  -6  -3    0.47    0.32 
   4   6   3    0.58    0.37 
  -4  -6   3    0.66    0.23 
   4   6   3    0.32    0.31 
   4  -6   4    1.32    0.47 
   4   6  -4    3.14    0.74 
   4  -6  -4    1.12    0.39 
   4   6   4    1.22    0.42 
  -4  -6   4    1.46    0.30 
   4   6   4    1.49    0.40 
   4   6  -5    0.22    0.30 
   4  -6   5    0.75    0.40 
   4   6   5    0.64    0.34 
   4  -6  -5    0.67    0.33 
   4   6  -6    2.75    0.49 
   4  -6   6    2.87    0.63 
   4   6   6    2.62    0.58 
   4  -6  -6    2.85    0.56 
   4  -6   7   -0.18    0.29 
   4   6   7   -0.41    0.36 
   5   6   0   -0.23    0.26 
   5   6   0    0.12    0.22 
   5  -6   0    0.09    0.19 
   5  -6   0    0.10    0.16 
   5  -6   1    0.13    0.15 
   5   6  -1    0.12    0.23 
   5  -6   1    0.08    0.20 
   5   6   1   -0.06    0.21 
   5   6   1    0.31    0.31 
  -5  -6   1   -0.53    0.40 
   5  -6  -1    0.27    0.24 
   5  -6  -1    0.11    0.14 
   5   6  -2    2.30    0.45 
   5  -6   2    3.22    0.57 
   5  -6  -2    2.71    0.52 
   5   6   2    2.94    0.82 
   5   6   2    2.95    0.62 
  -5  -6   2    2.95    0.57 
   5  -6  -2    2.73    0.28 
   5   6  -3    4.06    0.64 
   5  -6   3    3.38    0.61 
   5   6   3    3.86    0.82 
   5  -6  -3    4.85    0.70 
  -5  -6   3    4.86    0.44 
   5   6   3    4.55    0.76 
   5  -6   4    0.09    0.20 
   5   6  -4   -0.49    0.34 
   5   6   4    0.00    0.27 
   5  -6  -4   -0.13    0.22 
   5  -6   5    5.34    0.85 
   5   6  -5    6.11    0.78 
   5  -6  -5    4.56    0.64 
   5   6   5    5.69    0.81 
   5   6  -6   -0.08    0.29 
   5  -6   6   -0.34    0.19 
   5   6   6    0.22    0.30 
   5  -6  -6    0.27    0.32 
   5  -6   7    2.15    0.56 
   5   6   7    1.77    0.53 
   5  -6  -7    1.81    0.52 
   6  -6   0    4.17    0.43 
   6  -6   0    5.19    0.51 
   6   6   0    5.10    0.66 
   6   6   0    5.23    0.70 
   6  -6   1    1.36    0.30 
   6  -6   1    1.44    0.34 
   6   6  -1    1.14    0.37 
   6  -6  -1    1.14    0.37 
   6   6   1    1.10    0.34 
  -6  -6   1    2.33    0.72 
   6   6   1    2.19    0.50 
   6  -6  -1    1.22    0.21 
   6  -6   2    0.89    0.36 
   6  -6   2    0.74    0.21 
   6   6  -2    0.86    0.33 
   6   6   2    0.55    0.49 
  -6  -6   2    0.46    0.32 
   6  -6  -2    0.48    0.30 
   6   6   2    0.76    0.35 
   6  -6   3    0.15    0.31 
   6   6  -3   -0.17    0.24 
   6   6   3   -0.14    0.51 
   6   6   3    0.09    0.25 
   6  -6  -3   -0.24    0.19 
   6   6  -4   -0.05    0.27 
   6  -6   4    0.15    0.28 
   6  -6  -4    0.26    0.34 
   6   6   4    0.19    0.24 
   6  -6   5    0.25    0.30 
   6   6  -5    0.32    0.30 
   6   6   5    0.17    0.28 
   6  -6  -5    0.65    0.38 
   6  -6   6   -1.44    0.34 
   6   6  -6    0.36    0.32 
   6   6   6    0.67    0.35 
   6  -6  -6    0.16    0.31 
   6  -6   7    1.92    0.58 
   6  -6  -7    1.99    0.45 
   6   6   7    1.76    0.56 
   7  -6   0    0.05    0.22 
   7   6   0    0.06    0.34 
   7   6   0    0.07    0.26 
   7  -6   0    0.14    0.16 
   7   6  -1    2.59    0.51 
   7  -6   1    4.61    0.59 
   7  -6   1    4.61    0.55 
  -7  -6   1    2.98    0.80 
   7   6   1    3.51    0.57 
   7   6   1    3.05    0.55 
   7  -6  -1    3.53    0.57 
   7  -6  -1    3.08    0.31 
   7  -6   2    0.32    0.26 
   7   6  -2    0.83    0.33 
   7  -6  -2    0.70    0.35 
   7   6   2    1.20    0.43 
  -7  -6   2   -0.19    0.55 
   7   6   2    0.87    0.48 
   7   6  -3    0.41    0.29 
   7  -6   3    0.19    0.21 
   7   6   3    0.14    0.25 
   7  -6  -3    0.30    0.29 
   7   6   3   -0.28    0.49 
   7   6  -4    3.28    0.59 
   7  -6   4    3.46    0.69 
   7   6   4    3.54    0.65 
   7  -6  -4    3.92    0.63 
   7   6  -5    0.14    0.25 
   7  -6   5    0.02    0.31 
   7   6   5    0.15    0.27 
   7  -6  -5    0.41    0.33 
   7   6  -6    2.26    0.48 
   7  -6   6    2.45    0.63 
   7   6   6    2.52    0.59 
   7  -6  -6    1.93    0.49 
   8   6   0    2.47    0.57 
   8  -6   0    2.38    0.48 
   8  -6   0    3.06    0.40 
   8   6   0    1.83    0.48 
   8  -6   1    3.88    0.51 
   8   6  -1    3.34    0.59 
   8  -6   1    4.91    0.54 
   8   6   1    3.20    0.62 
   8   6   1    3.93    0.62 
   8  -6  -1    3.58    0.55 
  -8  -6   1    2.87    0.56 
   8  -6   2    0.45    0.28 
   8   6  -2    0.43    0.31 
   8   6   2    0.65    0.38 
   8   6   2    0.47    0.38 
   8  -6  -2    0.55    0.35 
   8   6  -3    2.07    0.44 
   8  -6   3    2.70    0.57 
   8  -6  -3    3.29    0.61 
   8   6   3    2.47    0.51 
   8   6  -4    0.11    0.24 
   8  -6   4    0.33    0.31 
   8   6   4    0.06    0.28 
   8  -6  -4   -0.20    0.23 
   8  -6   5    0.43    0.37 
   8   6  -5    0.19    0.29 
   8   6   5    0.20    0.28 
   8  -6  -5    0.52    0.39 
   8  -6   6    1.61    0.51 
   8   6  -6    0.71    0.36 
   8  -6  -6    0.58    0.38 
   8   6   6    1.39    0.45 
   9  -6   0    0.29    0.32 
   9   6   0   -0.16    0.21 
   9  -6   0   -0.10    0.19 
   9   6   0   -0.27    0.25 
   9  -6   1    2.44    0.42 
   9   6  -1    2.98    0.55 
   9  -6   1    2.65    0.44 
   9   6   1    2.96    0.57 
   9  -6  -1    2.20    0.51 
   9   6   1    1.30    0.42 
   9   6  -2   -0.15    0.19 
   9  -6   2    0.17    0.30 
   9   6   2   -0.44    0.34 
   9   6   2   -0.16    0.24 
   9  -6  -2    0.06    0.27 
   9   6  -3    2.66    0.50 
   9  -6   3    4.31    0.67 
   9  -6  -3    3.88    0.63 
   9   6   3    4.63    0.70 
   9  -6   4    0.25    0.28 
   9   6  -4    0.16    0.26 
   9   6   4    0.11    0.27 
   9  -6  -4    0.60    0.34 
   9  -6   5    3.82    0.72 
   9   6  -5    4.84    0.67 
   9  -6  -5    3.83    0.66 
   9   6   5    4.54    0.70 
   9  -6   6    0.03    0.30 
   9   6  -6    0.18    0.26 
   9  -6  -6   -0.04    0.28 
   9   6   6    0.50    0.47 
  10  -6   0    1.48    0.38 
  10   6   0    1.36    0.45 
  10  -6   1    4.36    0.59 
  10  -6   1    4.43    0.60 
  10   6  -1    3.79    0.58 
  10   6   1    4.87    0.69 
  10  -6  -1    3.33    0.55 
  10   6   1    3.47    0.55 
  10   6  -2    0.31    0.28 
  10  -6   2    0.99    0.42 
  10   6   2   -0.12    0.34 
  10  -6  -2    0.46    0.33 
  10   6   2    0.71    0.40 
  10  -6   3    2.36    0.50 
  10   6  -3    1.25    0.40 
  10   6   3    1.17    0.41 
  10  -6  -3    1.69    0.48 
  10   6  -4    0.29    0.29 
  10  -6   4    0.21    0.31 
  10  -6  -4    0.15    0.29 
  10   6   4    0.37    0.36 
  10   6  -5   -0.12    0.22 
  10  -6   5    0.03    0.26 
  10  -6  -5    0.19    0.29 
  10   6   5    0.13    0.34 
  11   6   0    0.06    0.24 
  11  -6   0   -0.21    0.20 
  11   6  -1   -0.15    0.18 
  11  -6   1    0.10    0.19 
  11   6   1    0.12    0.28 
  11  -6  -1   -0.25    0.19 
  11   6   1   -0.24    0.26 
  11  -6   2    2.41    0.51 
  11   6  -2    0.73    0.46 
  11   6   2    1.92    0.48 
  11  -6  -2    2.31    0.50 
  11   6  -3    0.20    0.26 
  11  -6   3    0.09    0.28 
  11  -6  -3   -0.56    0.18 
  11   6   3    0.13    0.28 
  11   6  -4    2.15    0.48 
  11  -6   4    4.16    0.66 
  11  -6  -4    3.50    0.65 
  11   6   4    4.15    0.66 
  11  -6   5    0.61    0.40 
  11   6  -5    0.54    0.36 
  11   6   5    0.19    0.32 
  11  -6  -5    0.07    0.30 
  12   6   0    4.88    0.68 
  12  -6   0    5.81    0.72 
  12   6  -1    8.15    0.78 
  12   6   1    6.20    0.79 
  12   6  -2    4.33    0.64 
  12  -6   2    4.69    0.63 
  12   6   2    3.99    0.67 
  12  -6  -2    3.94    0.59 
  12   6  -3    1.61    0.47 
  12  -6   3    2.50    0.50 
  12   6   3    1.93    0.50 
  12  -6  -3    2.30    0.53 
  12   6  -4    0.06    0.27 
  12  -6   4    0.39    0.33 
  12   6   4    0.68    0.38 
  12  -6  -4    0.52    0.30 
  13   6   0   -0.10    0.21 
  13  -6   0   -0.11    0.29 
  13   6  -1    0.30    0.30 
  13  -6  -1    0.06    0.25 
  13   6   1    0.27    0.36 
  13   6  -2    0.31    0.27 
  13   6   2    0.28    0.35 
  13  -6  -2    0.21    0.29 
  13   6  -3    4.09    0.66 
  13  -6   3    2.99    0.55 
  13   6   3    3.38    0.63 
  13  -6  -3    3.54    0.59 
  13  -6   4   -0.03    0.27 
  13   6  -4    0.26    0.33 
  13   6   4   -0.13    0.29 
  13  -6  -4   -0.18    0.23 
  14   6   0    1.30    0.43 
  14   6  -1    7.04    0.72 
  14  -6  -1    7.62    0.70 
  14   6  -2    1.47    0.43 
  14   6  -3    2.51    0.51 
  14   6   3    2.17    0.51 
  14  -6  -3    3.30    0.53 
  15   6   0    0.34    0.37 
  15   6  -1    0.13    0.31 
  15  -6  -1   -0.09    0.28 
   0   7   0    0.25    0.36 
   0  -7   0    0.06    0.50 
   0  -7  -1   79.94    2.23 
   0   7   1   79.17    2.24 
   0  -7   1   80.66    2.51 
   0   7  -1   79.51    1.85 
   0   7   2    1.03    0.38 
   0  -7   2    0.34    0.28 
   0   7   2    0.55    0.32 
   0   7  -2    0.71    0.26 
   0   7   3   32.30    1.31 
   0   7   3   31.57    1.34 
   0  -7   3   31.82    1.37 
   0   7  -3   31.53    0.96 
   0  -7   4    0.19    0.23 
   0   7   4    0.21    0.27 
   0   7   4    0.33    0.29 
   0   7  -4    0.53    0.26 
   0   7   5    6.92    0.71 
   0  -7   5    8.04    0.81 
   0   7   6    0.00    0.23 
   0  -7   6   -0.80    0.39 
   0  -7   7    1.11    0.46 
  -1   7   0    0.24    0.32 
   1   7   0   -0.17    0.32 
   1  -7   0    0.18    0.42 
  -1  -7   0    0.02    0.50 
  -1   7   1    0.33    0.29 
   1  -7   1    0.45    0.33 
   1   7  -1    0.38    0.24 
  -1   7  -1    0.22    0.31 
   1  -7  -1    0.24    0.51 
   1   7   1    0.36    0.55 
  -1  -7   1    0.23    0.49 
   1   7  -2    0.04    0.18 
   1  -7   2   -0.15    0.21 
  -1   7   2    0.12    0.21 
  -1  -7   2   -0.22    0.24 
  -1   7  -2    0.42    0.24 
   1   7   2   -0.14    0.27 
   1   7   2    0.18    0.25 
  -1   7   3    7.85    0.67 
   1  -7   3    7.58    0.76 
   1   7  -3    7.32    0.56 
  -1   7   3    8.94    0.79 
   1   7   3    9.06    0.78 
  -1  -7   3    7.67    0.65 
   1   7   3    8.65    0.86 
  -1   7  -3    8.34    0.53 
   1  -7   4    1.65    0.47 
  -1   7   4    0.94    0.35 
  -1   7   4    1.09    0.36 
   1   7  -4    1.24    0.34 
  -1   7  -4    1.53    0.30 
  -1  -7   4    1.42    0.41 
   1   7   4    1.62    0.45 
   1   7   4    1.60    0.45 
  -1   7   5   17.47    1.05 
   1   7  -5   12.75    1.03 
   1  -7   5   14.51    1.10 
  -1  -7   5   17.72    1.16 
   1  -7  -5   17.56    1.06 
   1   7   5   16.10    0.98 
   1   7   5   15.40    0.98 
   1  -7   6    0.53    0.42 
  -1   7   6    0.21    0.30 
   1   7   6   -0.02    0.31 
   1  -7  -6    0.07    0.24 
  -1  -7   6    0.05    0.26 
   1  -7   7    7.85    0.83 
   1   7   7    7.49    0.90 
  -2  -7   0    5.40    0.80 
  -2   7   0    6.62    0.57 
   2  -7   0    6.26    0.70 
   2   7   0    6.21    0.64 
  -2   7   1    3.82    0.56 
   2  -7   1    4.65    0.65 
   2   7  -1    2.96    0.45 
  -2  -7   1    3.21    0.90 
  -2   7  -1    3.87    0.49 
   2   7   1    2.02    0.53 
   2  -7  -1    4.25    0.74 
   2   7   1    3.00    0.54 
  -2   7   2    1.59    0.36 
   2   7  -2    2.14    0.39 
   2  -7   2    2.01    0.46 
   2   7   2    1.63    0.42 
  -2  -7   2    2.23    0.60 
   2  -7  -2    2.09    0.46 
   2   7   2    1.85    0.58 
  -2   7  -2    2.14    0.42 
  -2   7   3    0.20    0.25 
  -2   7   3   -0.21    0.21 
   2   7  -3   -0.01    0.17 
   2  -7   3   -0.14    0.23 
  -2  -7   3    0.21    0.27 
   2   7   3   -0.10    0.20 
   2   7   3   -0.12    0.22 
  -2   7   4    7.16    0.75 
   2  -7   4    4.96    0.74 
  -2   7   4    6.86    0.70 
   2   7  -4    5.16    0.53 
   2   7   4    5.21    0.72 
  -2  -7   4    6.45    0.68 
   2   7   4    4.66    0.70 
   2  -7   5    0.69    0.37 
  -2   7   5    0.76    0.34 
   2   7  -5    0.73    0.29 
   2   7   5    1.15    0.36 
   2  -7  -5    0.64    0.37 
  -2  -7   5    1.40    0.43 
   2   7   5    1.60    0.45 
   2  -7   6    3.14    0.65 
   2  -7  -6    3.90    0.62 
   2   7   6    3.83    0.68 
   2  -7   7    0.23    0.28 
   2   7   7    0.09    0.28 
   3  -7   0    0.15    0.26 
  -3  -7   0    0.00    0.30 
   3   7   0    0.23    0.27 
  -3   7   0    0.14    0.19 
   3   7  -1   17.88    0.87 
  -3   7   1   16.57    0.92 
   3  -7   1   17.57    0.98 
   3   7   1   17.23    1.32 
  -3   7  -1   15.37    0.64 
   3   7   1   16.81    1.01 
   3  -7  -1   17.23    1.18 
  -3  -7   1   18.03    1.61 
   3  -7   2    0.85    0.34 
   3   7  -2    1.41    0.35 
  -3   7   2    0.68    0.32 
  -3   7  -2    1.57    0.20 
   3   7   2    1.40    0.41 
  -3  -7   2    0.93    0.48 
   3  -7  -2    1.88    0.66 
   3   7   2    1.35    0.68 
   3  -7   3    6.85    0.69 
   3   7  -3    8.52    0.68 
  -3   7   3    6.57    0.72 
   3   7   3    7.93    0.78 
   3   7   3    8.20    0.95 
   3  -7  -3    7.77    0.74 
  -3  -7   3    8.82    0.73 
   3   7  -4    2.34    0.43 
   3  -7   4    2.33    0.56 
  -3  -7   4    2.92    0.48 
   3  -7  -4    2.47    0.56 
   3   7   4    2.08    0.43 
   3   7   4    2.27    0.49 
   3  -7   5    7.83    0.84 
   3   7  -5    7.97    0.67 
   3   7   5    7.60    0.76 
   3  -7  -5    8.17    0.77 
  -3  -7   5    8.79    0.70 
   3  -7   6    0.45    0.31 
   3  -7  -6    0.10    0.32 
   3   7   6    0.31    0.32 
   3  -7   7    3.92    0.72 
   3   7   7    4.93    0.75 
   4   7   0   37.70    1.41 
   4  -7   0   38.07    1.34 
  -4  -7   0   36.05    1.54 
  -4   7   0   37.91    1.25 
   4   7  -1   50.11    1.57 
  -4   7   1   49.40    1.51 
   4  -7   1   50.40    1.53 
   4   7   1   50.98    1.88 
  -4  -7   1   49.03    2.11 
   4  -7  -1   50.07    1.42 
   4   7   1   49.11    1.74 
  -4   7  -1   49.97    1.14 
   4   7  -2   21.24    1.01 
  -4   7   2   23.90    1.17 
   4  -7   2   21.06    1.15 
  -4  -7   2   20.83    1.30 
   4   7   2   21.72    1.18 
   4   7   2   21.29    1.61 
   4  -7  -2   21.45    1.29 
   4  -7   3   29.36    1.43 
   4   7  -3   30.33    1.25 
   4   7   3   30.56    1.40 
   4   7   3   28.76    1.56 
  -4  -7   3   29.32    1.16 
   4  -7  -3   29.78    1.45 
   4  -7   4   22.16    1.29 
   4   7  -4   22.08    1.06 
   4   7   4   22.55    1.29 
   4   7   4   20.04    1.09 
   4  -7  -4   20.89    1.16 
  -4  -7   4   21.26    0.90 
   4  -7   5    5.41    0.75 
   4   7  -5    7.47    0.70 
   4   7   5    4.07    0.82 
   4  -7  -5    7.18    0.78 
   4   7  -6    5.86    0.70 
   4  -7   6    4.67    0.79 
   4   7   6    5.96    0.94 
   4  -7  -6    4.99    0.68 
   4  -7   7    0.49    0.45 
   4   7   7   -0.17    0.31 
   4  -7  -7    0.37    0.34 
   5  -7   0   -0.07    0.16 
   5   7   0    0.02    0.23 
  -5  -7   0    0.13    0.27 
   5  -7   1    3.21    0.38 
   5   7  -1    1.87    0.42 
   5  -7   1    2.35    0.43 
   5   7   1    4.11    0.76 
  -5  -7   1    3.67    0.87 
   5  -7  -1    2.67    0.39 
   5   7   1    2.03    0.43 
   5  -7   2    2.77    0.51 
   5   7  -2    2.80    0.49 
   5   7   2    2.66    0.60 
   5   7   2    2.69    0.86 
   5  -7  -2    2.28    0.49 
   5  -7  -2    3.37    0.42 
  -5  -7   2    3.25    0.63 
   5   7  -3    7.88    0.73 
   5  -7   3    8.63    0.81 
   5   7   3    8.19    0.80 
   5  -7  -3    8.15    0.81 
   5   7   3    8.72    1.21 
  -5  -7   3    7.53    0.58 
   5   7  -4    2.33    0.49 
   5  -7   4    2.61    0.60 
   5  -7  -4    2.05    0.53 
   5   7   4    1.96    0.64 
   5   7   4    3.16    0.58 
   5   7  -5   10.09    0.80 
   5  -7   5    8.64    0.85 
   5   7   5    9.96    0.88 
   5  -7  -5    9.94    0.89 
   5  -7   6    3.03    0.61 
   5   7  -6    2.33    0.51 
   5   7   6    3.06    0.67 
   5  -7  -6    2.04    0.53 
   5  -7   7   10.43    0.99 
   5   7   7   12.00    1.07 
   5  -7  -7   10.42    0.97 
   6  -7   0    1.25    0.31 
   6   7   0    1.61    0.41 
   6  -7   0    1.81    0.36 
   6  -7   1    2.99    0.38 
   6   7  -1    2.17    0.42 
   6  -7   1    2.66    0.47 
   6   7   1    2.82    0.62 
  -6  -7   1    4.36    0.87 
   6  -7  -1    2.07    0.34 
   6  -7  -1    2.96    0.49 
   6   7   1    2.53    0.56 
   6  -7   2    2.05    0.49 
   6  -7   2    3.22    0.34 
   6   7  -2    1.39    0.41 
  -6  -7   2    1.66    0.53 
   6   7   2    2.55    0.71 
   6  -7  -2    1.27    0.40 
   6   7   2    3.62    0.71 
   6  -7   3   -0.16    0.25 
   6   7  -3    0.19    0.26 
   6  -7  -3    0.21    0.33 
   6   7   3    0.33    0.30 
   6   7   3    0.64    0.66 
   6  -7   4    1.76    0.51 
   6   7  -4    1.45    0.40 
   6  -7  -4    2.14    0.53 
   6   7   4    1.27    0.43 
   6  -7   5    0.91    0.47 
   6   7  -5    0.29    0.30 
   6  -7  -5    0.48    0.34 
   6   7   5    0.29    0.30 
   6  -7   6    1.59    0.49 
   6   7  -6    1.34    0.43 
   6  -7  -6    1.64    0.50 
   6   7   6    2.01    0.58 
   6  -7   7    0.56    0.44 
   6   7   7    1.16    0.42 
   6  -7  -7    0.23    0.39 
   7  -7   0   -0.01    0.17 
   7  -7   0    0.26    0.27 
   7   7   0   -0.16    0.24 
   7   7  -1    0.11    0.29 
   7  -7   1    0.28    0.23 
   7  -7   1   -0.02    0.16 
   7  -7  -1   -0.11    0.12 
   7  -7  -1    0.43    0.27 
  -7  -7   1    0.09    0.51 
   7   7   1    0.00    0.29 
   7   7   1    0.21    0.32 
   7  -7   2    4.06    0.65 
   7   7  -2    3.45    0.57 
   7  -7  -2    4.48    0.63 
   7   7   2    2.73    0.53 
  -7  -7   2    4.47    0.81 
   7   7   2    2.48    0.70 
   7  -7   3    2.22    0.54 
   7   7  -3    1.40    0.39 
   7   7   3    1.84    0.72 
   7   7   3    1.83    0.55 
   7  -7  -3    2.01    0.44 
   7   7  -4    2.22    0.50 
   7  -7   4    3.35    0.65 
   7  -7  -4    2.67    0.58 
   7   7   4    3.12    0.60 
   7  -7   5    3.34    0.67 
   7   7  -5    2.92    0.53 
   7  -7  -5    3.83    0.65 
   7   7   5    3.59    0.65 
   7  -7   6    3.88    0.73 
   7   7  -6    3.23    0.55 
   7  -7  -6    2.61    0.59 
   7   7   6    2.97    0.57 
   8   7   0   79.58    2.25 
   8  -7   0   78.68    1.70 
   8  -7   0   77.47    1.89 
   8  -7   1   33.28    1.28 
   8  -7   1   30.64    1.08 
   8   7  -1   29.62    1.37 
   8   7   1   28.92    1.36 
   8   7   1   30.63    1.43 
  -8  -7   1   30.97    1.65 
   8  -7  -1   29.34    1.23 
   8   7  -2   49.59    1.68 
   8  -7   2   48.75    1.65 
   8  -7  -2   48.26    1.65 
   8   7   2   47.94    1.79 
   8   7   2   48.72    2.03 
   8   7  -3   11.61    0.92 
   8  -7   3   11.69    0.92 
   8  -7  -3   11.31    0.98 
   8   7   3   10.43    0.87 
   8  -7   4   30.94    1.48 
   8   7  -4   30.03    1.33 
   8   7   4   32.62    1.58 
   8  -7  -4   30.50    1.44 
   8   7  -5    3.33    0.59 
   8  -7   5    4.66    0.82 
   8   7   5    3.55    0.66 
   8  -7  -5    2.29    0.53 
   8  -7   6   12.50    1.13 
   8   7  -6   12.01    0.90 
   8  -7  -6   11.40    1.04 
   8   7   6   11.61    1.00 
   9  -7   0    0.19    0.19 
   9  -7   0    0.00    0.22 
   9   7   0    0.57    0.33 
   9   7  -1   -0.12    0.22 
   9  -7   1    0.33    0.25 
   9  -7   1   -0.06    0.18 
   9   7   1    0.11    0.23 
   9   7   1    0.02    0.26 
   9  -7  -1    0.14    0.25 
   9  -7   2    1.54    0.41 
   9   7  -2    0.65    0.34 
   9  -7  -2    0.91    0.37 
   9   7   2    0.93    0.38 
   9   7   2    0.89    0.46 
   9  -7   3    7.91    1.06 
   9   7  -3    7.03    0.72 
   9  -7  -3    7.98    0.74 
   9   7   3    7.74    0.86 
   9  -7   4    3.17    0.61 
   9   7  -4    2.71    0.52 
   9   7   4    3.84    0.66 
   9  -7  -4    3.63    0.64 
   9  -7   5    5.53    0.83 
   9   7  -5    7.57    0.75 
   9  -7  -5    8.19    0.85 
   9   7   5    7.80    0.95 
   9  -7   6    5.52    0.85 
   9   7  -6    4.94    0.66 
   9   7   6    4.31    0.74 
   9  -7  -6    5.36    0.73 
  10  -7   0    0.12    0.23 
  10   7   0    0.25    0.27 
  10  -7   1    0.71    0.30 
  10  -7   1    0.79    0.34 
  10   7  -1    0.53    0.34 
  10   7   1    1.25    0.36 
  10  -7  -1    1.41    0.43 
  10   7   1    0.79    0.39 
  10  -7   2    0.56    0.33 
  10   7  -2    0.43    0.29 
  10   7   2    0.69    0.37 
  10   7   2    0.35    0.45 
  10  -7  -2    0.73    0.33 
  10  -7   3    0.98    0.41 
  10   7  -3    0.36    0.26 
  10   7   3    0.43    0.35 
  10  -7  -3    0.45    0.33 
  10   7  -4   -0.01    0.24 
  10  -7   4    0.09    0.26 
  10   7   4    0.25    0.35 
  10  -7  -4    0.27    0.28 
  10   7  -5   -0.08    0.25 
  10  -7   5    0.43    0.35 
  10  -7  -5   -0.08    0.31 
  10   7   5   -0.29    0.25 
  11   7   0    0.23    0.27 
  11  -7   0   -0.36    0.21 
  11  -7   1    0.44    0.28 
  11   7  -1    0.59    0.31 
  11  -7  -1    0.13    0.28 
  11   7   1    0.14    0.29 
  11   7   1    0.01    0.25 
  11  -7   2    0.25    0.29 
  11   7  -2    0.59    0.32 
  11   7   2    0.72    0.39 
  11  -7  -2    0.81    0.37 
  11  -7   3    0.09    0.28 
  11   7  -3    0.61    0.33 
  11   7   3    0.16    0.32 
  11  -7   4    5.07    0.77 
  11   7  -4    4.64    0.69 
  11   7   4    5.23    0.77 
  11  -7  -4    4.81    0.71 
  11  -7   5    0.49    0.34 
  11   7  -5    0.67    0.38 
  11  -7  -5    0.21    0.38 
  11   7   5    1.37    0.49 
  12   7   0   60.15    1.96 
  12  -7   0   56.06    1.69 
  12   7  -1    9.02    0.84 
  12  -7  -1    9.06    0.94 
  12   7   1   10.21    0.86 
  12  -7   2   50.90    1.72 
  12   7  -2   50.42    1.71 
  12   7   2   49.94    1.80 
  12  -7  -2   51.36    1.71 
  12  -7   3    6.91    0.72 
  12   7  -3    5.53    0.73 
  12   7   3    7.88    0.97 
  12  -7  -3    7.04    0.77 
  12   7  -4   24.84    1.33 
  12  -7   4   24.71    1.33 
  12  -7  -4   24.44    1.27 
  12   7   4   24.92    1.30 
  13   7   0   -0.13    0.27 
  13   7  -1    0.89    0.38 
  13  -7  -1    1.54    0.39 
  13   7   1    0.39    0.36 
  13   7  -2    0.92    0.40 
  13   7   2    0.64    0.45 
  13  -7  -2    1.25    0.39 
  13   7  -3    2.57    0.54 
  13  -7   3    3.35    0.65 
  13  -7  -3    2.55    0.58 
  13   7   3    3.17    0.62 
  13   7  -4    2.15    0.50 
  13  -7   4    2.54    0.54 
  13   7   4    2.86    0.58 
  13  -7  -4    1.85    0.44 
  14   7   0    0.93    0.41 
  14   7  -1   -0.26    0.27 
  14  -7  -1    0.04    0.28 
  14   7  -2   -0.15    0.31 
  14  -7  -2   -0.19    0.28 
  14   7  -3    0.32    0.32 
  14   7   3    0.24    0.32 
  14  -7  -3   -0.20    0.27 
  15   7   0   -0.38    0.32 
  15   7  -1   -1.14    0.26 
  15  -7  -1   -0.01    0.34 
   0  -8   0 1000.00    9.22 
   0   8   0  996.67    8.61 
   0   8  -1    1.77    0.46 
   0   8   1    1.54    0.50 
   0  -8  -1    2.10    0.55 
   0  -8   1    3.88    0.80 
   0   8   2  810.90    6.81 
   0   8  -2  812.03    5.27 
   0  -8   2  814.05    7.89 
   0   8   2  813.63    6.68 
   0   8   3    0.84    0.37 
   0  -8   3   -0.08    0.23 
   0   8   3    0.34    0.27 
   0   8  -3    0.43    0.23 
   0   8   4  399.62    4.81 
   0  -8   4  381.38    5.14 
   0   8  -4  390.21    3.39 
   0   8   4  388.63    4.59 
   0   8   5   -0.26    0.24 
   0   8   5    0.32    0.30 
   0  -8   5    0.36    0.28 
   0  -8   6  155.42    3.48 
   0   8   6  154.25    3.21 
   0  -8   7    0.09    0.32 
  -1   8   0   -0.02    0.32 
  -1  -8   0   -0.26    0.48 
   1   8   0   -0.01    0.39 
   1  -8   0   -0.32    0.38 
   1   8  -1    9.89    0.73 
  -1  -8  -1   11.75    1.01 
   1  -8   1    9.32    0.95 
  -1   8   1    8.94    0.84 
   1   8   1   11.06    1.40 
  -1  -8   1   11.23    1.23 
  -1   8  -1    9.88    0.90 
   1  -8  -1   10.25    1.30 
   1   8  -2   53.42    1.38 
   1  -8   2   51.82    1.89 
  -1   8   2   53.86    1.85 
  -1  -8   2   51.45    2.02 
  -1   8  -2   58.73    1.66 
   1   8   2   53.98    2.09 
   1  -8  -2   52.94    1.77 
   1   8   2   54.48    1.79 
   1   8  -3   19.86    0.84 
  -1   8   3   21.51    1.11 
  -1   8   3   21.51    1.24 
   1  -8   3   21.47    1.24 
   1   8   3   20.81    1.22 
  -1  -8   3   19.89    1.14 
  -1   8  -3   20.43    0.84 
   1   8   3   20.72    1.17 
   1   8  -4   77.59    1.64 
  -1   8   4   77.87    2.05 
  -1   8   4   76.77    2.14 
   1  -8   4   77.11    2.33 
  -1   8  -4   78.10    1.57 
   1   8   4   77.54    2.16 
  -1  -8   4   76.88    2.16 
   1   8   4   79.30    2.25 
  -1   8   5   19.53    1.10 
   1  -8   5   17.91    1.10 
   1   8   5   20.35    1.15 
   1   8   5   18.36    1.14 
  -1  -8   5   18.52    1.15 
   1  -8   6   64.82    2.12 
  -1   8   6   62.09    1.96 
   1   8   6   62.76    1.96 
  -1  -8   6   61.81    1.99 
   1  -8  -6   64.77    1.84 
   1  -8   7   11.85    1.07 
   1   8   7   11.50    0.97 
  -2  -8   0    5.09    0.98 
   2  -8   0    3.07    0.65 
  -2   8   0    3.86    0.54 
   2   8   0    1.28    0.39 
  -2   8   1   17.66    1.03 
   2  -8   1   16.70    1.15 
   2   8  -1   18.98    1.04 
  -2   8  -1   18.50    0.93 
  -2  -8   1   16.61    1.71 
   2   8   1   17.96    1.48 
   2  -8  -1   17.43    1.27 
   2  -8   2    2.93    0.58 
  -2   8   2    3.57    0.66 
   2   8  -2    3.16    0.46 
   2  -8  -2    4.35    0.69 
  -2  -8   2    4.36    0.88 
  -2   8  -2    2.89    0.47 
   2   8   2    4.21    0.87 
   2   8   2    3.44    0.57 
   2   8  -3    4.03    0.56 
  -2   8   3    2.92    0.54 
   2  -8   3    3.08    0.58 
   2   8   3    2.67    0.54 
   2   8   3    3.65    0.75 
  -2   8  -3    3.27    0.47 
  -2  -8   3    3.18    0.57 
  -2   8   4    1.39    0.43 
   2   8  -4    1.27    0.33 
  -2   8   4    1.09    0.40 
   2  -8   4    0.98    0.38 
  -2  -8   4    0.54    0.31 
   2   8   4    1.23    0.45 
   2   8   4    0.76    0.34 
   2   8  -5    3.16    0.47 
   2  -8   5    2.50    0.55 
  -2   8   5    3.35    0.56 
   2   8   5    2.81    0.46 
   2  -8  -5    2.32    0.51 
   2   8   5    3.31    0.59 
  -2  -8   5    2.79    0.53 
   2  -8   6   -0.14    0.27 
   2   8   6   -0.23    0.34 
   2  -8  -6    0.16    0.29 
   2  -8   7    9.85    0.96 
   2   8   7    9.99    0.92 
   3  -8   0    0.96    0.34 
   3   8   0   -0.06    0.30 
  -3   8   0    0.71    0.28 
  -3  -8   0    0.58    0.40 
  -3   8   1    1.61    0.39 
   3  -8   1    1.87    0.44 
   3   8  -1    1.74    0.41 
   3   8   1    1.72    0.45 
   3  -8  -1    1.62    0.68 
   3   8   1    1.80    0.61 
  -3  -8   1    1.80    0.75 
  -3   8  -1    1.96    0.34 
   3   8  -2   39.87    1.35 
   3  -8   2   38.13    1.57 
  -3   8   2   38.40    1.53 
   3   8   2   39.87    2.29 
  -3   8  -2   39.86    0.92 
   3   8   2   38.87    1.62 
  -3  -8   2   39.04    1.85 
   3  -8  -2   40.14    2.03 
   3  -8   3   20.17    1.22 
   3   8  -3   22.32    1.03 
  -3   8   3   22.33    1.26 
   3   8   3   20.41    1.30 
  -3  -8   3   21.15    1.11 
   3  -8  -3   21.87    1.16 
   3   8   3   23.05    1.30 
   3   8  -4   84.13    1.95 
   3  -8   4   85.40    2.50 
   3  -8  -4   83.49    1.96 
   3   8   4   78.99    2.35 
   3   8   4   82.43    2.30 
  -3  -8   4   86.09    2.12 
   3  -8   5   17.88    1.22 
   3   8  -5   19.55    0.95 
   3  -8  -5   21.10    1.20 
  -3  -8   5   18.67    0.96 
   3   8   5   18.93    1.06 
   3  -8   6   78.79    2.59 
   3   8   6   78.32    2.39 
   3  -8  -6   83.56    2.40 
   3  -8   7   12.31    1.14 
   3   8   7   12.21    0.94 
  -4  -8   0  849.90    6.83 
  -4   8   0  838.43    5.60 
   4  -8   0  843.81    6.41 
   4   8   0  843.34    6.79 
   4   8  -1    1.33    0.39 
  -4   8   1    1.53    0.38 
   4  -8   1    0.80    0.28 
   4   8   1    1.32    0.42 
   4   8   1    0.76    0.44 
  -4  -8   1    1.17    0.60 
   4  -8  -1    1.81    0.49 
  -4   8  -1    0.92    0.24 
  -4   8   2  622.10    5.63 
   4   8  -2  622.47    5.43 
   4  -8   2  622.37    6.58 
   4   8   2  617.08    6.46 
   4   8   2  618.75    7.56 
  -4   8  -2  619.67    2.83 
  -4  -8   2  620.79    7.24 
   4  -8  -2  621.60    6.53 
  -4   8   3    0.30    0.26 
   4  -8   3    0.02    0.20 
   4   8  -3    0.19    0.29 
  -4  -8   3    0.33    0.25 
   4  -8  -3   -0.24    0.39 
   4   8   3    0.13    0.49 
   4   8   3    0.42    0.33 
   4  -8   4  313.29    5.05 
   4   8  -4  314.27    3.88 
   4   8   4  312.90    4.46 
   4  -8  -4  314.25    4.16 
  -4  -8   4  308.17    3.69 
   4   8   4  311.61    4.81 
   4  -8   5    0.16    0.28 
   4   8  -5    0.37    0.30 
   4  -8  -5    0.19    0.31 
   4   8   5   -1.14    0.30 
   4  -8   6  128.96    3.36 
   4  -8  -6  124.81    2.86 
   4   8   6  126.55    3.11 
   4  -8   7   -0.07    0.28 
   4  -8  -7    0.07    0.31 
   4   8   7   -0.75    0.24 
  -5  -8   0   -0.22    0.28 
   5  -8   0    0.10    0.16 
   5   8   0    0.11    0.24 
  -5   8   0    0.04    0.20 
  -5   8   1    4.22    0.58 
   5  -8   1    5.53    0.62 
   5   8  -1    3.19    0.52 
  -5  -8   1    5.44    1.08 
   5   8   1    6.38    0.89 
   5   8   1    5.22    0.77 
   5  -8  -1    5.74    0.56 
   5  -8   2   19.20    1.12 
   5  -8   2   19.32    0.60 
   5   8  -2   19.66    1.04 
   5  -8  -2   18.08    0.87 
   5   8   2   19.14    1.22 
   5   8   2   17.88    1.75 
  -5  -8   2   19.61    1.57 
   5  -8   3    6.03    0.81 
   5   8  -3    6.64    0.71 
   5  -8  -3    7.54    0.78 
  -5  -8   3    6.15    0.64 
   5   8   3    5.75    0.82 
   5   8   3    7.46    1.22 
   5   8  -4   48.40    1.64 
   5  -8   4   47.73    1.81 
   5   8   4   46.35    1.81 
   5  -8  -4   44.90    1.72 
   5   8   4   44.95    1.67 
   5  -8   5   17.53    1.24 
   5   8  -5   18.84    1.07 
   5   8   5   19.48    1.40 
   5  -8  -5   18.91    1.13 
   5  -8   6   45.80    2.05 
   5   8  -6   46.85    1.59 
   5  -8  -6   48.43    1.86 
   5   8   6   45.95    1.90 
   5  -8   7    9.24    0.97 
   5   8   7    6.88    0.93 
   5  -8  -7    7.00    0.77 
   6  -8   0    9.46    0.67 
   6  -8   0    9.57    0.65 
   6   8   0    9.16    0.83 
  -6  -8   0    9.47    0.94 
   6   8  -1    4.30    0.60 
   6  -8   1    6.70    0.56 
   6  -8   1    7.81    0.66 
   6  -8  -1    7.11    0.66 
  -6  -8   1    6.25    1.10 
   6   8   1    7.60    0.96 
   6  -8  -1    7.51    0.53 
   6   8   1    7.70    0.87 
   6  -8   2   10.03    0.51 
   6  -8   2    9.95    0.83 
   6   8  -2   10.25    0.90 
  -6  -8   2   10.35    1.12 
   6  -8  -2   11.32    0.55 
   6   8   2   10.46    0.92 
   6   8   2   10.29    1.37 
   6  -8  -2   12.30    0.95 
   6   8  -3    1.15    0.38 
   6  -8   3    1.26    0.42 
   6   8   3    1.60    0.50 
   6   8   3    1.25    0.72 
   6  -8  -3    1.33    0.41 
   6   8  -4    7.00    0.72 
   6  -8   4    5.24    0.82 
   6   8   4    4.85    0.72 
   6  -8  -4    5.01    0.72 
   6   8  -5    2.74    0.51 
   6  -8   5    1.61    0.45 
   6  -8  -5    2.28    0.55 
   6   8   5    2.17    0.58 
   6  -8   6    1.21    0.64 
   6   8  -6    2.03    0.47 
   6   8   6    3.45    0.64 
   6  -8  -6    2.77    0.57 
   6  -8   7    8.59    1.10 
   6  -8  -7    8.05    0.88 
   6   8   7   10.24    1.05 
   7  -8   0    0.33    0.21 
  -7  -8   0    0.03    0.35 
   7  -8   0    0.25    0.25 
   7   8   0    0.38    0.28 
   7  -8   1    2.60    0.43 
   7   8  -1    2.04    0.45 
   7  -8   1    1.69    0.37 
  -7  -8   1    0.98    0.49 
   7   8   1    2.89    0.65 
   7  -8  -1    1.98    0.31 
   7  -8  -1    1.76    0.47 
   7   8   1    1.73    0.53 
   7   8  -2   29.80    1.44 
   7  -8   2   34.25    1.36 
   7  -8  -2   33.25    1.36 
   7   8   2   31.63    1.79 
  -7  -8   2   33.34    1.71 
   7   8   2   36.40    1.60 
   7  -8   3   14.38    1.07 
   7   8  -3   13.43    0.97 
   7  -8  -3   14.42    0.99 
   7   8   3   14.37    1.09 
   7   8   3   12.36    1.46 
   7  -8   4   56.30    2.23 
   7   8  -4   56.94    1.84 
   7  -8  -4   55.99    1.85 
   7   8   4   57.66    2.09 
   7   8  -5    9.82    0.85 
   7  -8   5   10.38    0.99 
   7   8   5   10.41    0.97 
   7  -8  -5    8.90    0.86 
   7  -8   6   46.59    1.94 
   7   8  -6   47.68    1.66 
   7  -8  -6   46.48    1.73 
   7   8   6   46.15    1.90 
   8  -8   0  426.65    3.97 
  -8  -8   0  430.24    5.03 
   8  -8   0  426.09    4.40 
   8   8   0  422.92    5.26 
   8   8  -1    0.37    0.29 
   8  -8   1    0.54    0.30 
   8  -8   1    0.23    0.26 
   8   8   1    0.36    0.34 
  -8  -8   1    0.09    0.48 
   8  -8  -1    0.24    0.31 
   8   8   1   -0.27    0.25 
   8  -8   2  320.57    4.30 
   8   8  -2  323.31    4.29 
   8   8   2  326.24    4.62 
   8   8   2  324.57    5.10 
   8  -8  -2  326.47    4.12 
   8  -8   3    0.44    0.31 
   8   8  -3    0.46    0.31 
   8   8   3    0.30    0.31 
   8  -8  -3    0.06    0.30 
   8   8   3   -0.18    0.45 
   8  -8   4  209.11    4.06 
   8   8  -4  200.39    3.38 
   8   8   4  202.32    3.91 
   8  -8  -4  205.84    3.59 
   8   8  -5   -0.14    0.26 
   8  -8   5    0.16    0.36 
   8  -8  -5    0.33    0.31 
   8   8   5   -0.02    0.31 
   8   8  -6   64.42    1.95 
   8  -8   6   63.77    2.29 
   8   8   6   63.74    2.25 
   8  -8  -6   65.54    2.13 
   9  -8   0    0.17    0.20 
  -9  -8   0    0.16    0.24 
   9  -8   0    0.35    0.27 
   9   8   0   -0.20    0.22 
   9  -8   1    0.58    0.28 
   9   8  -1    0.78    0.36 
   9  -8   1    0.22    0.23 
   9   8   1    1.09    0.48 
   9  -8  -1    0.72    0.35 
   9   8   1    0.75    0.41 
   9  -8   2    8.57    0.71 
   9   8  -2    9.18    0.82 
   9   8   2    7.86    1.03 
   9   8   2   10.38    0.91 
   9  -8  -2    9.79    0.83 
   9   8  -3    4.07    0.62 
   9  -8   3    4.15    0.64 
   9   8   3    4.72    0.73 
   9  -8  -3    4.38    0.67 
   9   8  -4   15.35    0.96 
   9  -8   4   15.58    1.15 
   9   8   4   15.43    1.07 
   9  -8  -4   15.59    1.02 
   9  -8   5    4.63    0.74 
   9   8  -5    4.92    0.69 
   9   8   5    4.81    0.74 
   9  -8  -5    5.27    0.78 
   9  -8   6   15.61    1.21 
   9   8  -6   16.03    1.01 
   9   8   6   15.06    1.20 
   9  -8  -6   16.16    1.15 
  10  -8   0   12.36    0.82 
 -10  -8   0   12.73    0.95 
  10   8   0   14.20    0.99 
  10  -8   1    1.22    0.40 
  10  -8   1    1.82    0.42 
  10   8  -1    2.04    0.50 
  10   8   1    1.45    0.50 
  10   8   1    2.54    0.55 
  10  -8  -1    1.84    0.51 
  10  -8   2   13.78    0.92 
  10   8  -2   14.00    0.92 
  10   8   2   13.46    1.13 
  10   8   2   13.33    0.99 
  10  -8  -2   11.04    1.13 
  10   8  -3    0.36    0.31 
  10  -8   3    0.61    0.33 
  10   8   3    0.43    0.32 
  10  -8  -3    0.66    0.37 
  10  -8   4    4.38    0.71 
  10   8  -4    5.21    0.69 
  10  -8  -4    5.17    0.74 
  10   8   4    6.32    0.89 
  10  -8   5    2.20    0.58 
  10   8  -5    1.96    0.48 
  10   8   5    1.93    0.55 
  10  -8  -5    2.55    0.61 
  11  -8   0   -0.08    0.23 
  11   8   0   -0.17    0.24 
  11  -8   1    0.82    0.34 
  11   8  -1    0.75    0.34 
  11   8   1    0.23    0.36 
  11  -8  -1    0.03    0.25 
  11   8   1    0.19    0.33 
  11  -8   2    9.52    0.79 
  11   8  -2   10.02    0.87 
  11  -8  -2   10.08    0.87 
  11   8   2   11.12    0.95 
  11   8   2    9.79    1.30 
  11   8  -3    3.10    0.59 
  11  -8   3    2.28    0.49 
  11   8   3    3.42    0.65 
  11  -8  -3    2.79    0.64 
  11   8  -4   29.16    1.44 
  11  -8   4   29.15    1.39 
  11  -8  -4   25.49    1.32 
  11   8   4   28.18    1.40 
  11   8  -5    5.88    0.74 
  11  -8   5    5.36    0.82 
  11  -8  -5    4.54    0.65 
  11   8   5    5.23    0.76 
  12   8   0  184.22    3.42 
  12  -8   0  182.77    3.08 
  12   8  -1    0.21    0.27 
  12   8   1   -0.07    0.29 
  12  -8  -1    0.36    0.28 
  12  -8   2  140.74    2.83 
  12   8  -2  137.48    3.06 
  12   8   2  136.25    3.08 
  12  -8  -2  134.97    2.91 
  12  -8   3   -0.01    0.26 
  12   8  -3    0.20    0.29 
  12   8   3    0.12    0.32 
  12  -8  -3   -0.13    0.22 
  12  -8   4   71.27    2.13 
  12   8  -4   68.78    2.03 
  12   8   4   71.25    2.20 
  12  -8  -4   67.61    2.04 
  13   8  -1    0.09    0.27 
  13   8   1   -0.05    0.32 
  13  -8  -1   -0.49    0.21 
  13   8  -2    1.55    0.45 
  13  -8  -2    1.01    0.45 
  13   8   2    1.74    0.58 
  13   8  -3    2.54    0.51 
  13  -8   3    1.97    0.47 
  13   8   3    2.16    0.52 
  14   8   0   12.71    0.94 
  14   8  -1   -0.03    0.28 
  14  -8  -1    0.37    0.29 
  14   8  -2    9.31    0.85 
  14  -8  -2    8.84    0.85 
  15   8   0    0.05    0.33 
   0   9   0   -0.32    0.25 
   0  -9   0    0.42    0.46 
   0   9  -1    0.06    0.31 
   0  -9   1    0.35    0.44 
   0   9   1    1.09    0.55 
   0  -9  -1    0.45    0.40 
   0  -9   2    0.24    0.32 
   0   9  -2    0.11    0.17 
   0   9   2    0.24    0.34 
   0  -9   3   13.58    1.07 
   0   9   3   12.83    0.93 
   0   9   3   12.73    1.03 
   0   9  -3   12.65    0.67 
   0  -9   4    0.68    0.36 
   0   9   4   -0.32    0.23 
   0   9  -4    0.21    0.23 
   0   9   4    0.58    0.37 
   0   9   5    4.17    0.65 
   0   9   5    5.76    0.65 
   0  -9   6   -0.43    0.40 
   0  -9  -6   -0.18    0.34 
   0   9   6   -0.20    0.27 
   0  -9   7    0.45    0.42 
  -1  -9   0   -0.27    0.44 
  -1   9   0   -0.08    0.33 
   1   9   0    0.49    0.43 
   1  -9   0   -0.10    0.50 
  -1  -9  -1    0.58    0.42 
  -1   9   1    0.29    0.51 
   1   9  -1    0.48    0.33 
   1  -9   1    0.34    0.40 
  -1   9  -1    0.27    0.39 
   1  -9  -1    0.61    0.52 
  -1  -9   1    0.27    0.53 
   1   9   1    0.42    0.47 
  -1   9   2    2.39    0.51 
   1   9  -2    3.17    0.49 
   1  -9   2    3.62    0.74 
  -1  -9   2    2.89    0.66 
   1   9   2    3.31    0.62 
   1  -9  -2    3.01    0.60 
   1   9   2    2.84    0.61 
  -1   9  -2    3.60    0.60 
  -1   9   3   -0.42    0.26 
  -1   9   3   -0.03    0.31 
   1  -9   3    0.07    0.25 
   1   9  -3    0.08    0.18 
   1   9   3    0.20    0.30 
  -1   9  -3    0.40    0.29 
   1   9   3    0.32    0.35 
  -1  -9   3   -0.01    0.27 
   1   9  -4    4.55    0.54 
  -1   9   4    4.44    0.70 
   1  -9   4    4.63    0.75 
  -1   9   4    4.16    0.69 
  -1  -9   4    4.46    0.62 
   1   9   4    5.78    0.90 
   1   9   4    4.79    0.75 
  -1   9   5    1.01    0.42 
   1  -9   5    0.43    0.33 
  -1   9   5    0.37    0.30 
   1   9   5    0.72    0.36 
  -1  -9   5    0.33    0.25 
   1   9   5    0.67    0.39 
  -1   9   6    6.30    0.86 
  -1  -9   6    7.38    0.82 
   1   9   6    5.55    0.89 
   1  -9  -6    6.38    0.79 
   1  -9   7    1.51    0.53 
   1   9   7    1.08    0.46 
   2  -9   0   56.29    2.28 
   2   9   0   57.53    1.94 
  -2  -9   0   55.01    2.47 
  -2   9   0   55.95    1.76 
   2  -9   1    0.73    0.35 
   2   9  -1    1.28    0.35 
  -2  -9  -1    0.77    0.40 
  -2   9   1    1.34    0.41 
  -2  -9   1    0.26    0.72 
  -2   9  -1    1.49    0.41 
   2  -9  -1    1.09    0.57 
   2   9   1    0.72    0.54 
   2  -9   2   16.47    1.16 
   2   9  -2   15.13    0.91 
  -2   9   2   16.92    1.13 
  -2  -9   2   16.40    1.32 
   2  -9  -2   16.06    1.16 
   2   9   2   16.42    1.54 
  -2   9  -2   15.74    0.95 
   2   9   2   15.75    1.15 
  -2   9   3    0.02    0.28 
   2   9  -3    0.21    0.23 
   2  -9   3   -0.06    0.25 
   2  -9  -3   -0.07    0.30 
  -2  -9   3   -0.02    0.26 
   2   9   3    0.25    0.39 
   2   9   3   -0.08    0.25 
  -2   9  -3    0.07    0.24 
   2  -9   4    6.01    0.85 
   2   9  -4    7.47    0.64 
  -2   9   4   11.33    0.97 
  -2   9   4    8.14    0.89 
   2   9   4    7.60    0.77 
  -2  -9   4    7.26    0.73 
   2   9   4    7.89    0.82 
   2  -9   5    0.02    0.31 
   2   9  -5    0.03    0.24 
  -2   9   5    0.39    0.35 
   2   9   5    0.39    0.33 
   2   9   5    0.24    0.24 
  -2  -9   5    1.25    0.41 
   2  -9   6    1.39    0.48 
   2   9   6    1.19    0.42 
   2  -9  -6    1.36    0.45 
   2  -9   7   -0.28    0.34 
   2   9   7    0.16    0.27 
   3  -9   0    0.35    0.33 
   3   9   0   -0.05    0.21 
  -3  -9   0    0.16    0.35 
  -3   9   0   -0.08    0.19 
  -3   9   1   -0.21    0.18 
   3   9  -1    0.04    0.22 
   3  -9   1    0.15    0.27 
   3   9   1    0.35    0.45 
  -3  -9   1   -0.05    0.41 
   3  -9  -1   -0.13    0.36 
  -3   9  -1    0.14    0.20 
  -3   9   2    0.19    0.24 
   3  -9   2    0.27    0.34 
   3   9  -2    0.02    0.20 
  -3  -9   2   -0.31    0.36 
   3   9   2    0.36    0.50 
   3  -9  -2    0.28    0.46 
  -3   9  -2    0.20    0.18 
   3   9   2   -0.05    0.23 
  -3   9   3    0.70    0.35 
   3   9  -3    0.37    0.27 
   3  -9   3    0.80    0.36 
   3  -9  -3    0.69    0.46 
   3   9   3    0.75    0.39 
   3   9   3    0.43    0.51 
  -3  -9   3    0.27    0.31 
  -3   9   4    0.73    0.35 
   3  -9   4    0.81    0.37 
   3   9  -4    1.27    0.35 
   3   9   4    1.36    0.41 
   3   9   4    0.74    0.35 
  -3  -9   4    1.37    0.40 
   3  -9  -4    1.21    0.41 
   3   9  -5   -0.03    0.22 
   3  -9   5   -0.02    0.23 
   3   9   5    0.37    0.34 
   3  -9  -5    0.30    0.37 
  -3  -9   5    0.35    0.26 
   3  -9   6    0.98    0.42 
   3   9   6    1.11    0.40 
   3  -9  -6    1.80    0.48 
   3   9   7   -0.17    0.25 
  -4  -9   0   46.95    1.97 
   4   9   0   47.81    1.68 
  -4   9   0   47.44    1.46 
   4  -9   0   46.62    1.62 
  -4   9   1   10.53    0.79 
   4   9  -1   11.81    0.80 
   4  -9   1   13.17    0.95 
   4   9   1   13.12    1.05 
   4  -9  -1   12.47    0.92 
   4   9   1   14.42    1.19 
  -4   9  -1   13.89    0.73 
  -4  -9   1    9.88    1.10 
   4   9  -2   31.78    1.21 
   4  -9   2   32.49    1.44 
  -4   9   2   34.47    1.42 
   4   9   2   30.99    1.46 
   4   9   2   31.44    1.82 
  -4  -9   2   30.88    1.81 
   4  -9  -2   31.78    1.44 
  -4   9  -2   30.99    0.76 
   4   9  -3    1.35    0.38 
  -4   9   3    0.93    0.37 
   4  -9   3    1.39    0.45 
   4   9   3    1.79    0.48 
  -4  -9   3    1.79    0.51 
   4  -9  -3    1.32    0.59 
   4   9   3    1.33    0.59 
   4   9  -4   14.21    0.92 
   4  -9   4   14.09    1.12 
   4   9   4   12.04    1.04 
   4   9   4   12.54    1.01 
   4  -9  -4   13.22    0.93 
  -4  -9   4   13.00    0.85 
   4   9  -5    2.63    0.48 
   4  -9   5    2.41    0.61 
   4  -9  -5    2.47    0.57 
   4   9   5    0.50    0.50 
   4  -9   6    5.79    0.87 
   4   9   6    5.24    0.77 
   4  -9  -6    4.33    0.66 
   4  -9   7    1.22    0.49 
   4  -9  -7    1.40    0.46 
   4   9   7    0.95    0.47 
  -5   9   0    0.01    0.17 
  -5  -9   0   -0.33    0.24 
   5   9   0    0.11    0.27 
   5  -9   0    0.21    0.21 
   5  -9   1   -0.28    0.13 
  -5   9   1    0.20    0.21 
   5   9  -1   -0.04    0.22 
   5   9   1    0.06    0.33 
  -5  -9   1    0.11    0.39 
  -5   9  -1   -0.10    0.12 
   5  -9  -1    0.06    0.21 
   5   9   1   -0.14    0.25 
   5  -9   2    3.50    0.64 
  -5   9   2    3.64    0.59 
   5  -9   2    3.50    0.32 
   5   9  -2    3.05    0.54 
   5   9   2    3.45    0.62 
  -5  -9   2    3.61    0.85 
   5  -9  -2    3.78    0.54 
   5   9   2    2.82    0.88 
   5   9  -3    3.19    0.50 
   5  -9   3    3.27    0.58 
  -5  -9   3    3.78    0.61 
   5   9   3    3.63    0.70 
   5   9   3    3.26    0.95 
   5  -9   4   13.17    1.05 
   5   9  -4   13.57    0.94 
   5   9   4   12.21    1.07 
   5  -9  -4   12.72    1.00 
   5   9   4   13.90    1.11 
   5   9  -5    1.04    0.36 
   5  -9   5    0.74    0.38 
   5  -9  -5    1.04    0.41 
   5   9  -6   11.55    0.86 
   5  -9   6   13.56    1.12 
   5   9   6   13.20    1.11 
   5  -9  -6   12.34    1.00 
   5  -9   7    0.57    0.47 
   5   9   7    1.48    0.59 
   5  -9  -7    1.73    0.48 
   6  -9   0    9.04    0.71 
  -6  -9   0    9.65    1.09 
   6   9   0    9.92    0.87 
   6  -9   1    3.21    0.51 
   6  -9   1    4.57    0.52 
   6   9  -1    2.62    0.50 
  -6  -9   1    3.01    0.81 
   6   9   1    4.01    0.68 
   6  -9  -1    3.88    0.48 
   6   9   1    3.86    0.69 
   6   9  -2   10.60    0.87 
   6  -9   2   14.14    1.00 
   6  -9   2   11.64    0.54 
  -6  -9   2   11.46    1.24 
   6  -9  -2   13.33    0.93 
   6   9   2   12.64    1.08 
   6   9   2   13.11    1.42 
   6  -9  -2   12.50    0.62 
   6   9  -3    2.75    0.54 
   6  -9   3    2.69    0.55 
   6   9   3    3.68    0.93 
   6  -9  -3    3.76    0.67 
   6   9   3    3.38    0.67 
   6   9  -4    5.10    0.71 
   6  -9   4    4.85    0.81 
   6   9   4    4.35    0.73 
   6  -9  -4    4.44    0.66 
   6  -9   5    0.25    0.28 
   6   9  -5    0.48    0.34 
   6   9   5    0.95    0.40 
   6  -9  -5    0.48    0.33 
   6  -9   6    2.50    0.64 
   6   9  -6    1.83    0.49 
   6   9   6    1.65    0.57 
   6  -9  -6    1.76    0.47 
   7  -9   0   -0.04    0.22 
  -7  -9   0   -0.27    0.28 
   7  -9   0    0.12    0.18 
   7   9   0   -0.27    0.18 
   7  -9   1   -0.08    0.15 
   7   9  -1    0.19    0.27 
   7  -9   1    0.11    0.23 
  -7  -9   1   -0.08    0.46 
   7   9   1    0.17    0.36 
   7   9   1    0.62    0.40 
   7  -9  -1   -0.04    0.15 
   7  -9  -1    0.18    0.27 
   7  -9   2    0.34    0.29 
   7   9  -2    0.37    0.31 
  -7  -9   2    1.16    0.66 
   7   9   2    0.25    0.30 
   7  -9  -2    0.32    0.31 
   7   9   2    1.19    0.60 
   7   9  -3    2.28    0.52 
   7  -9   3    2.60    0.57 
   7  -9  -3    1.95    0.49 
   7   9   3    2.36    0.56 
   7   9   3    0.90    0.60 
   7  -9   4    0.42    0.37 
   7   9  -4    0.91    0.38 
   7  -9  -4    0.54    0.40 
   7   9   4    0.21    0.32 
   7   9  -5    1.15    0.44 
   7  -9   5   -0.16    0.30 
   7   9   5    0.25    0.29 
   7  -9  -5   -0.22    0.26 
   7  -9   6    0.33    0.39 
   7   9  -6    0.25    0.33 
   7   9   6    0.18    0.31 
   7  -9  -6    0.15    0.33 
   8   9   0   77.94    2.34 
   8  -9   0   77.55    1.75 
   8  -9   0   77.85    1.95 
  -8  -9   0   77.55    2.42 
   8   9  -1    3.48    0.65 
   8  -9   1    3.15    0.53 
   8  -9   1    3.90    0.49 
   8   9   1    2.78    0.57 
   8  -9  -1    3.36    0.53 
   8   9   1    3.34    0.67 
  -8  -9   1    3.64    0.85 
   8  -9  -1    3.05    0.54 
   8   9  -2   59.21    1.93 
   8  -9   2   56.83    1.80 
   8  -9  -2   59.01    1.86 
   8   9   2   57.40    2.00 
   8   9   2   51.69    2.21 
   8  -9   3    4.52    0.76 
   8   9  -3    4.32    0.65 
   8   9   3    3.30    0.82 
   8  -9  -3    3.45    0.55 
   8   9   3    3.27    0.61 
   8   9  -4   34.76    1.53 
   8  -9   4   35.73    1.67 
   8   9   4   34.19    1.69 
   8  -9  -4   35.47    1.55 
   8  -9   5    0.17    0.36 
   8   9  -5    0.48    0.35 
   8   9   5   -0.19    0.30 
   8  -9  -5    0.58    0.38 
   8  -9   6   11.73    1.10 
   8   9  -6   10.04    0.84 
   8   9   6   11.93    0.95 
   8  -9  -6   10.56    0.93 
   9  -9   0    0.16    0.27 
   9  -9   0    0.19    0.21 
   9   9   0    0.12    0.28 
  -9  -9   0    0.39    0.36 
   9  -9   1    0.80    0.31 
   9  -9   1    0.44    0.24 
   9   9  -1    0.80    0.37 
  -9  -9   1   -0.03    0.62 
   9  -9  -1    0.54    0.34 
   9   9   1    0.69    0.40 
   9   9   1    1.51    0.52 
   9   9  -2    7.27    0.76 
   9  -9   2    7.39    0.72 
   9   9   2    7.13    1.00 
   9   9   2    6.51    0.85 
   9  -9  -2    8.62    0.82 
   9   9  -3    1.02    0.37 
   9  -9   3    1.12    0.42 
   9  -9  -3    1.54    0.46 
   9   9   3    0.32    0.35 
   9  -9   4   13.03    1.10 
   9   9  -4   13.89    1.02 
   9  -9  -4   12.76    0.99 
   9   9   4   11.26    0.94 
   9   9  -5    1.91    0.47 
   9  -9   5    1.90    0.54 
   9   9   5    0.90    0.44 
   9  -9  -5    2.47    0.55 
   9   9  -6   11.60    0.90 
   9  -9   6   11.18    1.09 
   9   9   6    9.24    0.92 
   9  -9  -6   10.07    0.95 
 -10  -9   0    2.45    0.59 
  10  -9   0    2.71    0.48 
  10   9   0    3.12    0.62 
  10  -9   1    5.62    0.61 
  10   9  -1    7.00    0.84 
  10  -9  -1    6.12    0.63 
  10   9   1    6.29    0.83 
  10   9   1    6.34    0.82 
  10   9  -2    5.04    0.69 
  10  -9   2    4.19    0.63 
  10  -9  -2    5.20    0.68 
  10   9   2    4.89    0.70 
  10   9   2    5.05    0.82 
  10   9  -3    1.89    0.44 
  10  -9   3    1.64    0.47 
  10   9   3    1.70    0.52 
  10  -9  -3    1.75    0.44 
  10   9  -4    1.18    0.40 
  10  -9   4    1.43    0.53 
  10   9   4    2.19    0.56 
  10  -9  -4    1.08    0.45 
  10  -9   5    0.79    0.42 
  10   9  -5    0.42    0.32 
  10   9   5    0.39    0.36 
  10  -9  -5    0.92    0.43 
  11   9   0    0.36    0.26 
  11  -9   0   -0.19    0.19 
  11  -9   1   -0.07    0.21 
  11   9  -1    0.39    0.32 
  11   9   1   -0.74    0.33 
  11  -9  -1    0.46    0.32 
  11   9   1    0.36    0.43 
  11   9  -2    0.61    0.31 
  11  -9   2    1.30    0.41 
  11   9   2    1.60    0.61 
  11  -9  -2    0.69    0.36 
  11   9   2    0.87    0.43 
  11   9  -3    0.38    0.29 
  11  -9   3    0.25    0.28 
  11  -9  -3    0.24    0.30 
  11   9   3    0.00    0.25 
  11  -9   4    0.45    0.32 
  11   9  -4    0.46    0.36 
  11  -9  -4    0.35    0.35 
  11   9   4    1.01    0.44 
  11   9  -5    2.17    0.53 
  11  -9   5    3.22    0.67 
  11   9   5    1.59    0.51 
  11  -9  -5    2.65    0.60 
  12   9   0   65.32    2.03 
  12  -9   0   65.88    1.80 
  12   9  -1    2.09    0.51 
  12  -9  -1    2.74    0.51 
  12   9   1    2.00    0.56 
  12   9  -2   48.95    1.74 
  12  -9   2   48.90    1.66 
  12   9   2   47.24    1.88 
  12  -9  -2   46.82    1.66 
  12   9  -3    0.57    0.31 
  12  -9   3    0.61    0.35 
  12  -9  -3    0.23    0.28 
  12   9   3    0.66    0.38 
  12  -9   4   30.46    1.51 
  12   9  -4   30.80    1.44 
  12   9   4   30.06    1.48 
  12  -9  -4   30.62    1.39 
  13   9   0   -0.85    0.30 
  13   9  -1    0.09    0.23 
  13  -9  -1    0.31    0.27 
  13   9   1   -0.13    0.30 
  13   9  -2    3.09    0.57 
  13  -9  -2    3.40    0.56 
  13   9   2    3.55    0.65 
  13  -9   3    1.04    0.40 
  13   9  -3    1.09    0.42 
  13  -9  -3    0.52    0.40 
  13   9   3    0.37    0.40 
  14   9   0    1.81    0.45 
  14   9  -1    2.61    0.62 
  14  -9  -1    2.00    0.45 
  14   9  -2    1.92    0.50 
  14  -9  -2   -0.55    0.31 
   0 -10   0    0.38    0.48 
   0  10   0    0.14    0.33 
   0  10  -1    0.17    0.40 
   0 -10   1    0.51    0.60 
   0 -10  -1    0.30    0.49 
   0  10   1   -0.16    0.35 
   0  10  -2    2.38    0.51 
   0  10   2    2.18    0.61 
   0 -10   2    2.00    0.58 
   0 -10  -2    2.71    0.63 
   0 -10   3    0.05    0.26 
   0  10   3    0.02    0.28 
   0  10  -3    0.06    0.23 
   0  10   3    0.07    0.28 
   0  10   4    0.93    0.40 
   0  10   4    1.25    0.42 
   0 -10   4    1.07    0.43 
   0  10  -4    1.31    0.33 
   0 -10   5    0.05    0.27 
   0  10   5   -0.14    0.29 
   0  10   5   -0.09    0.27 
   0 -10   6    2.21    0.69 
   0 -10  -6    1.83    0.52 
   0  10   6    2.77    0.59 
   0 -10   7    0.44    0.46 
   1  10   0    0.18    0.42 
  -1 -10   0   -0.47    0.41 
  -1  10   0    0.14    0.36 
   1 -10   0    0.10    0.48 
   1 -10   1    0.69    0.47 
  -1 -10  -1    0.41    0.48 
   1  10  -1    0.57    0.36 
  -1  10   1    0.52    0.38 
  -1 -10   1    1.29    0.79 
  -1  10  -1    0.66    0.37 
   1 -10  -1    0.39    0.59 
   1  10   1    0.82    0.50 
  -1  10   2    1.47    0.45 
   1 -10   2    1.68    0.56 
   1  10  -2    1.14    0.34 
   1  10   2    1.57    0.58 
   1 -10  -2    1.19    0.54 
  -1  10  -2    1.99    0.53 
  -1 -10   2    0.95    0.50 
   1  10  -3    0.46    0.28 
  -1  10   3    0.76    0.39 
   1 -10   3    0.73    0.43 
  -1 -10   3    0.64    0.39 
   1  10   3    0.74    0.41 
   1  10   3    0.40    0.33 
  -1  10  -3    0.28    0.28 
  -1  10   4    0.64    0.37 
   1 -10   4    0.27    0.30 
   1  10  -4    0.95    0.29 
  -1  10   4    0.41    0.34 
  -1 -10   4    0.83    0.38 
   1  10   4    1.39    0.45 
   1  10   4    0.76    0.40 
  -1  10   5    0.17    0.28 
   1 -10   5    0.35    0.29 
  -1  10   5    0.27    0.26 
   1  10   5    0.60    0.36 
   1  10   5    0.32    0.32 
  -1 -10   5    0.35    0.32 
  -1  10   6    0.79    0.61 
   1 -10   6    1.08    0.42 
   1 -10  -6    0.86    0.43 
  -1 -10   6    2.03    0.57 
   1 -10   7    0.47    0.44 
   1  10   7    0.09    0.39 
  -2  10   0    3.50    0.72 
   2 -10   0    2.89    0.70 
   2  10   0    2.17    0.59 
  -2 -10   0    2.79    0.93 
   2  10  -1    0.38    0.31 
  -2  10   1    0.74    0.39 
   2 -10   1    0.56    0.37 
  -2 -10  -1    0.27    0.40 
   2  10   1    0.35    0.43 
   2 -10  -1    1.06    0.45 
  -2  10  -1    0.45    0.33 
  -2 -10   1    0.91    0.66 
   2  10  -2    3.19    0.53 
  -2  10   2    2.75    0.56 
   2 -10   2    2.97    0.64 
   2  10   2    2.61    0.61 
  -2 -10   2    4.87    1.04 
   2  10   2    1.97    0.79 
   2 -10  -2    2.76    0.62 
  -2  10  -2    3.05    0.54 
   2 -10   3    3.86    0.73 
  -2  10   3    3.04    0.61 
   2  10  -3    3.76    0.52 
  -2 -10   3    4.77    0.76 
   2  10   3    3.89    0.64 
   2  10   3    4.44    0.90 
  -2  10  -3    3.98    0.54 
   2 -10  -3    4.22    0.73 
  -2  10   4    0.15    0.30 
   2 -10   4   -0.21    0.26 
   2  10  -4    0.34    0.24 
  -2 -10   4    0.11    0.30 
   2  10   4    0.18    0.33 
   2  10   4    0.59    0.33 
   2 -10  -4    0.11    0.31 
   2  10  -5    4.60    0.56 
   2 -10   5    4.84    0.84 
   2  10   5    5.11    0.75 
   2  10   5    4.56    0.72 
  -2 -10   5    4.71    0.73 
   2 -10   6   -0.16    0.21 
   2 -10  -6   -0.02    0.30 
   2  10   6   -0.13    0.26 
   2 -10   7    3.82    0.74 
   2  10   7    3.89    0.68 
   3 -10   0    0.13    0.33 
  -3  10   0    0.01    0.22 
  -3 -10   0    0.23    0.51 
   3  10   0   -0.20    0.31 
   3  10  -1    0.42    0.31 
   3 -10   1    1.21    0.41 
  -3  10   1    0.39    0.36 
  -3 -10  -1    0.03    0.32 
  -3 -10   1    1.07    0.62 
   3 -10  -1    0.49    0.42 
   3  10   1    0.98    0.53 
  -3  10  -1    0.51    0.27 
  -3  10   2    1.65    0.39 
   3 -10   2    2.07    0.51 
   3  10  -2    2.12    0.46 
   3  10   2    1.79    0.53 
  -3  10  -2    1.94    0.33 
   3  10   2    3.10    0.79 
  -3 -10   2    3.95    0.88 
   3 -10  -2    3.40    0.78 
  -3  10   3    0.17    0.26 
   3  10  -3    0.25    0.27 
   3 -10   3   -0.01    0.25 
   3  10   3    0.01    0.21 
   3 -10  -3    0.07    0.38 
  -3 -10   3    0.23    0.30 
   3  10   3   -0.09    0.28 
  -3  10   4    4.79    0.72 
   3 -10   4    4.86    0.76 
   3  10  -4    3.53    0.53 
  -3 -10   4    4.91    0.70 
   3  10   4    4.83    0.73 
   3 -10  -4    4.37    0.72 
   3  10   4    3.13    0.65 
   3 -10   5    0.14    0.29 
   3  10  -5    0.12    0.22 
   3  10   5    0.22    0.31 
  -3 -10   5    0.06    0.29 
   3  10   5   -0.07    0.31 
   3 -10  -5   -0.17    0.27 
   3 -10   6    0.88    0.45 
   3  10   6   -0.10    0.30 
   3 -10  -6    1.30    0.43 
   3 -10   7   -0.09    0.24 
   3  10   7    0.04    0.30 
   4  10   0    0.12    0.31 
   4 -10   0    0.09    0.32 
  -4  10   0    0.43    0.26 
  -4 -10   0    0.12    0.44 
   4  10  -1    0.18    0.28 
  -4  10   1    0.22    0.25 
   4 -10   1    0.05    0.26 
   4  10   1    0.28    0.45 
   4 -10  -1    0.69    0.35 
  -4 -10   1    0.11    0.36 
  -4  10  -1    0.16    0.19 
  -4  10   2   -0.05    0.21 
   4  10  -2   -0.24    0.21 
   4 -10   2    0.19    0.30 
   4 -10  -2   -0.13    0.31 
   4  10   2   -0.07    0.39 
  -4  10  -2    0.14    0.17 
   4  10   2   -0.17    0.27 
  -4 -10   2    0.01    0.34 
   4 -10   3   -0.10    0.19 
  -4  10   3   -0.14    0.21 
   4  10  -3    0.59    0.30 
  -4 -10   3    0.68    0.38 
   4  10   3    0.47    0.53 
   4  10   3   -0.34    0.26 
   4 -10  -3    0.36    0.51 
   4  10  -4    0.00    0.22 
   4 -10   4    0.67    0.38 
   4  10   4    0.15    0.30 
   4  10   4    0.73    0.38 
  -4 -10   4    0.06    0.29 
   4  10  -5    0.06    0.28 
   4 -10   5   -0.01    0.27 
   4  10   5    0.11    0.26 
   4 -10  -5    0.10    0.31 
   4 -10   6    1.53    0.49 
   4 -10  -6    1.20    0.46 
   4  10   6    1.64    0.50 
   4 -10   7   -0.28    0.33 
   4 -10  -7    0.31    0.34 
   4  10   7   -0.25    0.23 
   5 -10   0   -0.10    0.19 
   5  10   0    0.17    0.29 
  -5 -10   0   -0.34    0.37 
  -5  10   0   -0.01    0.16 
  -5  10   1    0.18    0.25 
   5  10  -1    0.31    0.33 
   5 -10   1    0.27    0.25 
   5  10   1    0.98    0.45 
   5  10   1    0.11    0.35 
  -5  10  -1    0.17    0.21 
   5 -10  -1    0.50    0.30 
  -5 -10   1   -0.41    0.32 
   5 -10   2    0.23    0.29 
  -5  10   2    0.08    0.23 
   5  10  -2    0.07    0.25 
  -5 -10   2    0.33    0.58 
   5 -10  -2    1.14    0.41 
  -5  10  -2    0.31    0.14 
   5  10   2    0.70    0.40 
   5  10   2    0.16    0.41 
   5 -10   3    1.21    0.46 
   5  10  -3    1.15    0.38 
   5  10   3    1.87    0.85 
   5  10   3    0.59    0.41 
   5 -10  -3    0.33    0.49 
  -5 -10   3    0.92    0.43 
   5 -10   4    0.11    0.23 
   5  10  -4    0.27    0.29 
   5 -10  -4    0.14    0.31 
   5  10   4    0.35    0.29 
   5  10   4    0.62    0.51 
   5 -10   5    0.70    0.38 
   5  10  -5    0.87    0.37 
   5  10   5    0.96    0.36 
   5 -10  -5    0.54    0.38 
   5 -10   6   -0.22    0.26 
   5  10  -6    0.08    0.27 
   5  10   6    0.06    0.34 
   5 -10  -6   -0.04    0.28 
   5 -10   7    0.13    0.38 
   5  10   7   -0.35    0.31 
   5 -10  -7    0.75    0.41 
  -6  10   0   12.30    0.82 
   6 -10   0   11.69    0.77 
  -6 -10   0   11.35    0.99 
   6  10   0   11.93    0.99 
  -6  10   1    0.12    0.21 
   6 -10   1    0.01    0.20 
   6  10  -1    0.19    0.28 
   6 -10  -1    0.64    0.28 
   6  10   1   -0.17    0.28 
  -6 -10   1    0.44    0.58 
   6  10   1    0.48    0.40 
   6  10  -2    1.35    0.40 
   6 -10   2    0.93    0.25 
   6 -10   2    1.73    0.46 
   6  10   2    0.95    0.45 
   6  10   2    0.71    0.56 
   6 -10  -2    1.32    0.34 
  -6 -10   2    1.41    0.71 
   6  10  -3    0.28    0.29 
   6 -10   3   -0.18    0.22 
  -6 -10   3   -0.43    0.30 
   6 -10  -3    0.65    0.33 
   6  10   3   -1.00    0.40 
   6  10   3   -0.33    0.41 
   6 -10   4    1.44    0.51 
   6  10  -4    0.55    0.34 
   6 -10  -4    1.54    0.46 
   6  10   4    0.61    0.36 
   6 -10   5    0.98    0.40 
   6  10  -5    1.70    0.43 
   6 -10  -5    1.05    0.42 
   6  10   5    1.61    0.48 
   6 -10   6   -0.53    0.26 
   6  10  -6    0.36    0.36 
   6 -10  -6   -0.59    0.22 
   6  10   6    0.17    0.38 
  -7 -10   0    0.16    0.35 
   7 -10   0    0.22    0.20 
   7  10   0    0.03    0.29 
   7 -10   0    0.22    0.26 
   7 -10   1   -0.11    0.16 
   7  10  -1    0.22    0.29 
   7 -10   1   -0.04    0.18 
   7 -10  -1   -0.03    0.27 
   7  10   1   -0.26    0.28 
   7  10   1    0.27    0.32 
   7 -10  -1    0.23    0.21 
  -7 -10   1    0.35    0.53 
   7  10  -2    1.37    0.43 
   7 -10   2    1.35    0.38 
   7  10   2    1.79    0.67 
   7  10   2    0.80    0.43 
   7 -10  -2    1.18    0.42 
  -7 -10   2    0.56    0.67 
   7 -10   3   -0.15    0.22 
   7  10  -3    0.28    0.29 
   7  10   3    0.32    0.45 
   7 -10  -3    0.21    0.27 
   7  10   3   -0.17    0.30 
   7 -10   4    3.84    0.67 
   7  10  -4    4.56    0.70 
   7  10   4    3.17    0.66 
   7 -10  -4    2.91    0.59 
   7 -10   5    0.00    0.29 
   7  10  -5   -0.27    0.27 
   7 -10  -5   -0.22    0.31 
   7  10   5    0.15    0.26 
   7  10  -6    5.07    0.72 
   7 -10   6    5.22    0.86 
   7 -10  -6    6.36    0.85 
   7  10   6    5.06    0.80 
   8 -10   0    4.70    0.50 
   8 -10   0    3.39    0.51 
   8  10   0    4.05    0.73 
  -8 -10   0    3.32    0.67 
   8 -10   1    0.62    0.31 
   8  10  -1    0.31    0.31 
   8 -10   1    0.56    0.30 
   8  10   1    0.81    0.44 
   8  10   1    0.26    0.34 
   8 -10  -1   -0.53    0.18 
   8 -10  -1    0.26    0.25 
  -8 -10   1    0.14    0.53 
   8  10  -2    1.23    0.40 
   8 -10   2    1.00    0.35 
   8  10   2    1.42    0.59 
   8 -10  -2    0.82    0.35 
   8  10   2    1.44    0.53 
   8 -10   3   -0.02    0.20 
   8  10  -3    0.10    0.25 
   8  10   3   -0.47    0.39 
   8  10   3   -0.35    0.27 
   8 -10  -3    0.13    0.26 
   8 -10   4    0.27    0.30 
   8  10  -4    0.19    0.27 
   8  10   4   -0.06    0.29 
   8 -10  -4    0.37    0.35 
   8  10  -5    0.18    0.27 
   8 -10   5    0.02    0.30 
   8  10   5   -0.17    0.27 
   8 -10  -5    0.00    0.31 
   8 -10   6    0.73    0.44 
   8  10  -6    0.01    0.30 
   8 -10  -6    0.69    0.39 
   8  10   6    0.28    0.35 
   9 -10   0   -0.15    0.18 
  -9 -10   0    0.39    0.29 
   9  10   0    0.08    0.26 
   9 -10   0    0.17    0.18 
   9 -10   1    0.46    0.31 
   9  10  -1    0.55    0.37 
   9 -10   1    0.70    0.32 
   9 -10  -1    1.23    0.38 
   9  10   1    0.29    0.40 
   9  10   1    0.62    0.44 
  -9 -10   1    0.18    0.64 
   9 -10   2    0.04    0.25 
   9  10  -2    0.00    0.26 
   9 -10  -2    0.26    0.35 
   9  10   2    0.36    0.35 
   9  10   2   -0.48    0.34 
   9  10  -3    2.94    0.54 
   9 -10   3    2.51    0.51 
   9  10   3    3.59    0.68 
   9 -10  -3    2.53    0.52 
   9 -10   4    0.17    0.26 
   9  10  -4   -0.26    0.17 
   9 -10  -4   -0.07    0.27 
   9  10   4   -0.06    0.30 
   9 -10   5    2.59    0.62 
   9  10  -5    2.17    0.50 
   9  10   5    2.27    0.56 
   9 -10  -5    1.10    0.46 
   9 -10   6   -0.11    0.29 
   9  10  -6    0.07    0.31 
   9  10   6    0.07    0.32 
   9 -10  -6   -0.05    0.32 
  10 -10   0    3.37    0.51 
 -10 -10   0    3.32    0.60 
  10  10   0    3.45    0.62 
  10 -10   1    0.62    0.30 
  10  10   1    1.66    0.54 
  10 -10  -1    1.28    0.41 
  10  10  -2    4.69    0.67 
  10 -10   2    4.43    0.60 
  10  10   2    4.45    0.81 
  10 -10  -2    4.97    0.69 
  10  10   2    6.20    1.00 
  10  10  -3    0.68    0.36 
  10 -10   3    0.23    0.29 
  10 -10  -3    0.07    0.31 
  10  10   3    0.52    0.37 
  10  10  -4    1.45    0.42 
  10 -10   4    1.25    0.51 
  10  10   4    0.39    0.35 
  10 -10  -4    0.66    0.35 
  10  10  -5   -0.02    0.28 
  10 -10   5   -0.02    0.26 
  10 -10  -5   -0.15    0.32 
  10  10   5    0.16    0.38 
  11 -10   0   -0.15    0.24 
  11  10   0    0.13    0.25 
  11  10  -1    0.13    0.23 
  11 -10   1    0.06    0.24 
  11 -10  -1   -0.30    0.21 
  11  10   1   -0.33    0.41 
  11  10  -2    1.59    0.47 
  11 -10   2    2.49    0.56 
  11 -10  -2    2.01    0.46 
  11  10   2    1.37    0.48 
  11  10  -3   -0.30    0.18 
  11 -10   3    0.16    0.26 
  11 -10  -3   -0.10    0.24 
  11  10   3    0.08    0.30 
  11 -10   4    4.14    0.70 
  11  10  -4    4.57    0.69 
  11 -10  -4    4.22    0.66 
  11  10   4    5.22    0.74 
  11 -10   5   -0.12    0.28 
  11  10  -5   -0.02    0.25 
  11 -10  -5    0.27    0.34 
  11  10   5    0.34    0.37 
  12 -10   0    5.36    0.69 
  12  10   0    4.80    0.73 
  12  10  -1    0.23    0.27 
 -12 -10  -1    0.66    0.65 
  12 -10  -1    0.30    0.32 
  12  10   1    0.09    0.37 
  12 -10   2    2.96    0.55 
  12  10  -2    3.75    0.63 
  12  10   2    3.07    0.61 
  12 -10  -2    3.83    0.61 
  12  10  -3    0.33    0.32 
  12 -10   3    0.25    0.28 
  12  10   3    0.36    0.37 
  12 -10  -3    0.15    0.28 
  12 -10   4    0.87    0.42 
  12  10  -4    0.75    0.39 
  12  10   4    0.81    0.42 
  12 -10  -4    0.40    0.37 
  13  10   0   -0.13    0.21 
  13  10  -1    0.45    0.35 
  13  10   1    0.34    0.40 
  13 -10  -1    0.38    0.30 
  13  10  -2    0.39    0.29 
  13  10   2    0.26    0.34 
  13 -10  -2   -0.02    0.26 
  13  10  -3    0.92    0.39 
  13 -10   3    1.64    0.43 
  13 -10  -3    1.46    0.46 
  13  10   3    2.61    0.64 
  14  10   0    6.36    0.69 
  14  10  -1    4.06    0.67 
  14 -10  -1    4.42    0.64 
  14  10  -2    2.95    0.60 
  14 -10  -2    3.41    0.59 
   0 -11   0    0.76    0.52 
   0  11   0    0.29    0.38 
   0 -11   1    2.04    0.76 
   0 -11  -1    3.04    0.89 
   0  11   1    2.40    0.73 
   0  11  -1    2.53    0.68 
   0  11   2    0.15    0.36 
   0 -11   2    0.21    0.40 
   0  11  -2    0.29    0.27 
   0 -11  -2    0.23    0.40 
   0  11   3    1.34    0.50 
   0  11  -3    1.19    0.33 
   0 -11   3    1.23    0.45 
   0  11   4    0.18    0.30 
   0  11   4    0.24    0.32 
   0  11  -4   -0.13    0.21 
   0 -11   4    0.14    0.31 
   0 -11   5    5.28    0.91 
   0  11   5    5.49    0.77 
   0  11   5    4.50    0.80 
   0 -11   6   -0.98    0.33 
   0  11   6    0.31    0.25 
   0 -11   7    4.18    0.79 
   1 -11   0   -0.13    0.40 
  -1 -11   0   -0.12    0.37 
   1  11   0   -0.38    0.33 
  -1  11   0    0.20    0.42 
  -1  11   1    0.78    0.45 
   1 -11   1    0.01    0.38 
   1  11  -1    0.35    0.32 
  -1 -11  -1    0.76    0.52 
  -1  11  -1    0.95    0.42 
   1  11   1    0.27    0.41 
   1 -11  -1   -0.07    0.48 
  -1 -11   1    0.09    0.53 
  -1 -11  -2    8.17    0.90 
  -1  11   2    8.37    1.12 
   1 -11   2    7.98    1.11 
   1  11  -2    7.81    0.74 
   1 -11  -2    6.90    0.96 
   1  11   2    7.13    1.11 
  -1 -11   2    6.51    1.14 
  -1  11  -2    7.59    1.02 
   1  11  -3    0.20    0.27 
   1 -11   3    0.11    0.35 
  -1  11   3    0.27    0.40 
   1  11   3   -0.23    0.27 
  -1 -11   3   -0.22    0.27 
   1  11   3    0.16    0.36 
   1 -11  -3   -0.33    0.32 
  -1  11  -3   -0.12    0.22 
   1  11  -4   15.33    0.85 
   1 -11   4   17.00    1.25 
  -1  11   4   13.89    1.13 
  -1 -11   4   16.03    1.17 
   1  11   4   16.09    1.30 
   1  11   4   14.24    1.15 
  -1  11   5    1.34    0.46 
  -1  11   5    1.39    0.40 
   1 -11   5    2.25    0.56 
   1  11   5    1.30    0.47 
  -1 -11   5    1.98    0.52 
   1  11   5    1.12    0.47 
   1 -11   6    9.79    1.05 
  -1 -11   6   14.88    1.17 
   1  11   6    9.58    1.14 
   1 -11  -6    8.82    0.89 
   1 -11   7   -0.55    0.29 
   1  11   7    0.29    0.41 
   2  11   0  122.65    3.29 
   2 -11   0  120.50    3.85 
  -2 -11   0  120.60    4.22 
  -2  11   0  125.08    2.98 
  -2 -11  -1   14.96    1.17 
   2 -11   1   17.63    1.32 
   2  11  -1   17.98    1.00 
  -2  11   1   18.83    1.25 
  -2  11  -1   16.68    1.17 
  -2 -11   1   18.11    1.69 
   2  11   1   19.11    1.42 
   2 -11  -1   20.75    1.37 
   2  11  -2   66.82    1.90 
  -2  11   2   66.60    2.25 
   2 -11   2   67.63    2.51 
   2 -11  -2   66.39    2.64 
  -2 -11   2   68.20    2.90 
   2  11   2   67.18    3.04 
  -2  11  -2   61.65    1.82 
  -2  11   3    1.23    0.48 
   2  11  -3    1.84    0.42 
   2 -11   3    1.64    0.52 
   2  11   3    0.85    0.48 
  -2 -11   3    2.06    0.66 
   2  11   3    0.93    0.40 
   2 -11  -3    1.11    0.52 
  -2  11  -3    0.58    0.25 
  -2  11   4   27.68    1.47 
   2 -11   4   32.34    1.76 
   2  11  -4   27.13    1.17 
   2  11   4   29.14    1.67 
   2  11   4   27.93    1.39 
   2 -11  -4   27.98    1.39 
  -2 -11   4   24.57    1.35 
  -2  11   5    1.43    0.45 
   2  11  -5    2.16    0.44 
   2 -11   5    2.14    0.57 
  -2 -11   5    2.77    0.61 
   2  11   5    2.35    0.57 
   2  11   5    2.83    0.64 
   2 -11  -5    2.11    0.50 
   2 -11   6    2.99    0.68 
   2 -11  -6    3.73    0.75 
   2  11   6    4.57    0.72 
   2 -11   7    0.59    0.47 
   2  11   7    0.58    0.42 
   3  11   0    0.13    0.32 
  -3 -11   0   -0.19    0.39 
  -3  11   0   -0.16    0.17 
   3 -11   0    0.56    0.41 
  -3  11   1    0.10    0.25 
   3  11  -1   -0.08    0.27 
  -3 -11  -1    0.29    0.41 
   3 -11   1   -0.02    0.29 
   3 -11  -1   -0.48    0.29 
   3  11   1   -0.11    0.51 
  -3 -11   1   -0.08    0.35 
  -3  11  -1    0.09    0.22 
   3  11  -2    9.88    0.76 
  -3  11   2    8.25    0.83 
   3 -11   2    9.07    0.84 
   3  11   2    8.66    1.24 
   3  11   2    8.81    0.86 
   3 -11  -2    9.54    0.99 
  -3  11  -2    8.29    0.63 
  -3 -11   2    8.86    1.25 
  -3  11   3    0.04    0.28 
   3 -11   3   -0.11    0.23 
   3  11  -3    0.05    0.22 
  -3 -11   3   -0.01    0.36 
   3 -11  -3   -0.23    0.37 
   3  11   3    0.08    0.29 
   3  11   3    0.04    0.47 
   3 -11   4   14.01    1.15 
  -3  11   4   15.91    1.21 
   3  11  -4   15.10    0.92 
  -3 -11   4   14.95    1.09 
   3  11   4   13.42    1.20 
   3 -11  -4   14.10    1.04 
   3  11   4   14.97    1.08 
   3  11  -5    1.40    0.40 
   3 -11   5    0.13    0.35 
   3  11   5    0.83    0.41 
  -3 -11   5    0.56    0.37 
   3  11   5    0.96    0.44 
   3 -11   6   14.47    1.17 
   3 -11  -6   15.92    1.14 
   3  11   6   13.58    1.05 
   3 -11   7    0.48    0.42 
   3 -11  -7    0.68    0.64 
   3  11   7    0.77    0.43 
   4 -11   0    0.23    0.30 
  -4 -11   0    0.31    0.43 
   4  11   0    0.81    0.42 
  -4  11   0    0.61    0.29 
  -4 -11  -1    0.33    0.38 
   4 -11   1    0.58    0.38 
  -4  11   1    0.76    0.38 
   4  11  -1    0.24    0.29 
   4 -11  -1    0.18    0.29 
  -4 -11   1   -0.04    0.38 
  -4  11  -1    0.21    0.21 
   4  11   1    0.29    0.49 
   4  11  -2    0.24    0.26 
   4 -11   2    0.09    0.26 
  -4  11   2    0.10    0.24 
  -4 -11   2    0.52    0.71 
  -4  11  -2    0.13    0.16 
   4  11   2    0.10    0.32 
   4 -11  -2    0.11    0.33 
   4  11   2   -0.15    0.34 
   4 -11   3    3.44    0.70 
  -4  11   3    2.79    0.58 
   4  11  -3    3.09    0.52 
   4 -11  -3    4.21    0.88 
   4  11   3    2.80    0.93 
   4  11   3    3.01    0.65 
  -4 -11   3    2.88    0.65 
   4  11  -4    0.80    0.31 
   4 -11   4    1.31    0.43 
  -4  11   4    1.11    0.41 
  -4 -11   4    0.78    0.46 
   4  11   4    0.55    0.34 
   4  11   4    1.36    0.58 
   4  11  -5    2.69    0.47 
   4  11   5    1.13    0.43 
   4 -11  -5    1.58    0.57 
   4 -11   6   -0.14    0.23 
   4  11   6    0.20    0.27 
   4 -11  -6    0.05    0.31 
   4 -11   7    2.82    0.71 
   4  11   7    2.92    0.64 
   4 -11  -7    1.76    0.55 
  -5 -11   0   -0.14    0.40 
   5 -11   0    0.11    0.24 
   5  11   0   -0.06    0.38 
  -5  11   0    0.23    0.22 
  -5  11   1    0.58    0.30 
  -5 -11  -1    0.85    0.48 
   5 -11   1    1.06    0.40 
   5  11  -1    0.40    0.33 
  -5  11  -1    0.28    0.21 
  -5 -11   1    0.10    0.40 
   5 -11  -1    0.37    0.31 
   5  11   1    1.28    0.58 
  -5  11   2    1.98    0.50 
   5  11  -2    1.67    0.45 
   5 -11   2    1.43    0.45 
   5  11   2    2.81    0.69 
   5  11   2    1.63    0.71 
  -5 -11   2    1.28    0.66 
  -5  11  -2    2.32    0.33 
   5 -11  -2    2.13    0.48 
  -5  11   3    1.80    0.48 
   5  11  -3    1.19    0.38 
   5 -11   3    1.44    0.46 
   5  11   3    1.60    0.54 
  -5 -11   3    1.38    0.57 
   5  11   3    2.44    0.84 
   5 -11  -3    1.58    0.51 
   5  11  -4    6.32    0.79 
   5 -11   4    6.36    0.94 
   5  11   4    7.65    1.11 
   5  11   4    7.00    0.93 
   5 -11  -4    8.01    0.89 
   5  11  -5    3.17    0.52 
   5 -11   5    2.98    0.71 
   5 -11  -5    2.56    0.58 
   5  11   5    3.72    0.73 
   5 -11   6    9.46    1.02 
   5  11  -6    8.80    1.06 
   5  11   6    9.57    0.94 
   5 -11  -6    8.71    0.96 
   5 -11   7    1.93    0.63 
   5  11   7    2.59    0.63 
   5 -11  -7    2.43    0.57 
   6 -11   0   48.15    1.55 
  -6  11   0   47.54    1.48 
   6  11   0   51.65    1.85 
  -6 -11   0   44.31    1.91 
   6  11  -1   45.22    1.74 
   6 -11   1   44.51    1.63 
  -6  11   1   42.25    1.57 
   6 -11  -1   43.11    1.40 
  -6 -11   1   42.89    2.24 
   6  11   1   42.54    1.91 
  -6  11  -1   44.02    1.28 
   6  11  -2   45.27    1.61 
   6 -11   2   43.67    1.72 
  -6  11   2   45.79    1.70 
   6  11   2   44.89    1.87 
   6 -11  -2   45.23    1.32 
  -6 -11   2   43.95    2.39 
   6  11   2   44.91    2.44 
   6  11  -3   33.22    1.40 
   6 -11   3   35.55    1.67 
   6  11   3   32.48    1.99 
   6  11   3   34.30    1.82 
  -6 -11   3   33.44    1.69 
   6 -11  -3   33.95    1.59 
   6 -11   4   17.59    1.35 
   6  11  -4   16.44    1.03 
   6  11   4   17.31    1.30 
   6  11   4   13.85    1.38 
   6 -11  -4   15.73    1.11 
   6 -11   5   10.87    1.04 
   6  11  -5   10.67    0.90 
   6 -11  -5   11.69    0.97 
   6  11   5   10.20    0.96 
   6  11  -6    3.99    0.61 
   6 -11   6    3.72    0.73 
   6 -11  -6    3.99    0.69 
   6  11   6    3.88    0.74 
   7 -11   0    0.08    0.18 
   7 -11   0    0.23    0.28 
  -7 -11   0   -0.03    0.41 
   7  11   0   -0.34    0.22 
   7 -11   1    0.27    0.25 
   7  11  -1    0.47    0.37 
   7 -11   1    0.54    0.30 
   7  11   1    0.55    0.36 
  -7 -11   1    1.15    0.65 
   7 -11  -1    0.28    0.29 
   7 -11  -1    0.59    0.28 
   7  11  -2    6.23    0.77 
   7 -11   2    7.11    0.90 
   7  11   2    5.88    1.01 
   7 -11  -2    6.67    0.72 
   7  11   2    6.51    0.92 
  -7 -11   2    8.78    1.51 
   7  11  -3    0.24    0.28 
   7 -11   3    0.70    0.36 
   7 -11  -3    0.79    0.37 
   7  11   3    0.36    0.45 
   7  11   3    1.54    0.52 
   7 -11   4   11.78    0.99 
   7  11  -4   12.61    0.95 
   7 -11  -4   13.18    1.09 
   7  11   4   12.26    1.09 
   7  11  -5    2.21    0.50 
   7 -11   5    2.55    0.64 
   7  11   5    1.46    0.49 
   7 -11  -5    1.86    0.49 
   7  11  -6   10.08    0.87 
   7 -11   6    7.98    1.10 
   7 -11  -6    8.69    0.87 
   7  11   6    8.66    0.91 
   8  11   0    0.68    0.38 
   8 -11   0    0.55    0.28 
   8 -11   0    0.66    0.31 
  -8 -11   0    0.64    0.50 
   8  11  -1    0.15    0.28 
   8 -11   1    0.09    0.20 
   8 -11   1    0.37    0.31 
  -8 -11   1    0.98    0.56 
   8 -11  -1    0.20    0.27 
   8 -11  -1    0.20    0.24 
   8  11   1   -1.03    0.31 
   8  11  -2    0.03    0.29 
   8 -11   2    0.73    0.33 
   8  11   2    0.74    0.53 
   8  11   2    0.72    0.40 
   8 -11  -2    0.17    0.26 
   8  11  -3   -0.01    0.27 
   8 -11   3    0.15    0.27 
   8 -11  -3    0.21    0.30 
   8  11   3    0.68    0.42 
   8  11   3    0.11    0.32 
   8 -11   4    0.00    0.24 
   8  11  -4    0.04    0.24 
   8 -11  -4    0.00    0.27 
   8  11   4    0.11    0.30 
   8 -11   5    1.42    0.48 
   8  11  -5    1.18    0.41 
   8  11   5    1.98    0.56 
   8 -11  -5    0.81    0.44 
   8  11  -6   -0.03    0.27 
   8 -11   6   -0.42    0.26 
   8  11   6   -0.37    0.20 
   8 -11  -6   -0.16    0.28 
   9  11   0   -0.18    0.22 
   9 -11   0   -0.06    0.25 
  -9 -11   0   -0.32    0.38 
   9 -11   0   -0.18    0.15 
   9 -11   1    0.20    0.22 
   9 -11   1   -0.13    0.21 
   9  11  -1    0.44    0.31 
   9 -11  -1    0.09    0.22 
   9  11   1    0.70    0.47 
  -9 -11   1    0.46    0.52 
   9 -11   2    1.82    0.44 
   9  11  -2    2.61    0.53 
   9  11   2    3.68    0.82 
   9  11   2    1.50    0.54 
   9 -11  -2    2.02    0.46 
   9 -11   3    4.50    0.79 
   9  11  -3    2.59    0.51 
   9  11   3    2.67    0.57 
   9 -11  -3    3.50    0.61 
   9  11  -4    3.25    0.58 
   9 -11   4    2.74    0.58 
   9 -11  -4    3.96    0.66 
   9  11   4    2.56    0.56 
   9  11  -5    4.74    0.76 
   9 -11   5    4.58    0.82 
   9 -11  -5    4.40    0.69 
   9  11   5    3.90    0.67 
  10  11   0   26.81    1.36 
  10 -11   0   24.67    1.06 
 -10 -11   0   24.05    1.33 
  10 -11   1   51.87    1.63 
  10  11  -1   52.43    1.97 
  10  11   1   54.64    2.05 
  10 -11  -1   52.55    1.69 
  10  11  -2   20.97    1.22 
  10 -11   2   19.49    1.09 
  10  11   2   21.92    1.49 
  10  11   2   20.32    1.31 
  10 -11  -2   21.22    1.20 
  10 -11   3   32.07    1.54 
  10  11  -3   32.27    1.48 
  10 -11  -3   30.89    1.43 
  10  11   3   33.16    1.62 
  10  11  -4    7.93    0.81 
  10 -11   4    7.98    1.00 
  10  11   4    8.97    0.90 
  10 -11  -4    6.53    0.83 
  10  11  -5   19.57    1.19 
  10 -11   5   17.39    1.24 
  10 -11  -5   18.13    1.22 
  10  11   5   18.42    1.25 
  11  11   0   -0.30    0.20 
  11 -11   0    0.22    0.29 
  11  11  -1    0.57    0.36 
 -11 -11  -1   -0.23    0.23 
  11 -11   1    0.39    0.30 
  11  11   1    0.10    0.40 
  11 -11  -1    0.31    0.29 
  11 -11   2    2.01    0.47 
  11  11  -2    2.29    0.54 
  11  11   2    1.36    0.58 
  11  11   2    2.72    0.66 
  11 -11  -2    1.58    0.43 
  11 -11   3    1.75    0.59 
  11  11  -3    1.81    0.45 
  11 -11  -3    2.28    0.49 
  11  11   3    1.68    0.54 
  11 -11   4    3.89    0.69 
  11  11  -4    4.81    0.67 
  11 -11  -4    4.62    0.69 
  11  11   4    4.98    0.75 
  12  11   0    0.40    0.31 
  12 -11   0    0.23    0.40 
  12  11  -1    0.11    0.28 
 -12 -11  -1    0.20    0.41 
  12  11   1   -0.17    0.27 
  12 -11  -1    0.07    0.26 
  12  11  -2    0.72    0.33 
  12 -11   2   -0.22    0.20 
  12  11   2   -0.77    0.35 
  12 -11  -2    0.33    0.35 
  12 -11   3    0.33    0.32 
  12  11  -3   -0.14    0.22 
  12  11   3    0.06    0.36 
  12 -11  -3   -0.79    0.22 
  12 -11   4    0.01    0.27 
  12  11  -4    0.31    0.31 
  12 -11  -4    0.08    0.26 
  12  11   4    0.45    0.38 
  13  11   0    0.18    0.25 
  13  11  -1    0.82    0.38 
  13 -11  -1    1.01    0.38 
  13  11   1    0.88    0.33 
  13  11  -2    0.21    0.29 
  13 -11  -2    0.22    0.27 
  13 -11   3    2.84    0.58 
  13  11  -3    4.47    0.69 
  13 -11  -3    3.97    0.62 
  13  11   3    4.76    0.79 
  14  11   0    7.88    0.87 
  14  11  -1   37.17    1.60 
  14 -11  -1   35.65    1.56 
  14  11  -2    8.93    0.96 
  14 -11  -2    7.79    0.76 
   0 -12   0   45.36    2.08 
   0  12   0   43.45    1.98 
   0 -12  -1    2.03    0.72 
   0 -12   1    1.61    0.70 
   0  12   1    1.63    0.69 
   0  12  -1    1.29    0.54 
   0 -12  -2    2.03    0.66 
   0  12   2    3.03    0.99 
   0  12  -2    2.88    0.60 
   0 -12   2    3.43    0.88 
   0 -12  -3    0.28    0.38 
   0  12  -3    0.63    0.37 
   0 -12   3    0.39    0.46 
   0  12   3    0.38    0.37 
   0  12  -4    1.12    0.39 
   0  12   4    0.97    0.45 
   0  12   4    1.14    0.41 
   0 -12   4    0.34    0.32 
   0  12   5   -0.15    0.29 
   0 -12   5    0.13    0.28 
   0  12   5   -0.29    0.21 
   0 -12   6    6.46    0.90 
   0  12   6    5.95    0.78 
   0  12   6    4.37    0.66 
   0 -12   7    0.32    0.49 
   1 -12   0    0.07    0.35 
  -1  12   0    0.08    0.41 
   1  12   0    0.56    0.47 
  -1 -12   0   -0.23    0.34 
   1 -12   1    8.71    1.24 
  -1 -12  -1   10.21    1.02 
  -1  12   1   11.93    1.12 
   1  12  -1   11.14    1.02 
   1 -12  -1    8.66    1.16 
  -1 -12   1   10.36    1.62 
   1  12   1    8.88    1.19 
   1  12  -2   11.47    0.91 
  -1 -12  -2   12.94    1.18 
   1 -12   2   11.32    1.17 
  -1  12   2   13.09    1.15 
   1  12   2   12.16    1.49 
   1 -12  -2   10.26    1.12 
  -1 -12   2   12.29    1.33 
  -1  12  -2   12.14    1.06 
  -1  12   3   49.46    2.07 
   1  12  -3   51.31    1.60 
   1 -12   3   52.42    2.28 
  -1 -12   3   53.01    2.43 
   1  12   3   47.32    2.17 
   1 -12  -3   51.29    2.05 
  -1  12  -3   50.76    1.75 
   1  12  -4   15.57    0.81 
  -1  12   4   15.98    1.21 
   1 -12   4   16.83    1.33 
   1 -12  -4   11.31    0.93 
   1  12   4   14.31    1.09 
  -1 -12   4   13.84    1.19 
   1  12   4   15.65    1.27 
   1 -12   5   80.61    2.70 
  -1  12   5   78.94    2.53 
  -1 -12   5   77.61    2.55 
   1  12   5   81.97    2.56 
   1  12   5   81.51    2.46 
   1 -12   6   16.62    1.27 
  -1 -12   6   16.44    1.30 
   1  12   6   15.28    1.09 
   1 -12   7   56.75    2.30 
   1  12   7   51.73    2.18 
  -2  12   0    0.55    0.41 
   2  12   0    1.87    0.59 
   2 -12   0    0.71    0.46 
  -2 -12   0    1.47    0.73 
  -2 -12  -1  832.73    8.36 
   2  12  -1  826.27    7.72 
  -2  12   1  830.28    7.78 
   2 -12   1  811.34    9.43 
  -2  12  -1  829.61    7.68 
   2 -12  -1  827.43    8.32 
  -2 -12   1  827.35    9.84 
   2  12   1  827.24    9.03 
   2 -12   2    0.67    0.52 
  -2  12   2    0.80    0.36 
  -2 -12  -2    0.49    0.45 
   2  12  -2    0.42    0.30 
   2  12   2    0.04    0.52 
  -2  12  -2    0.94    0.40 
  -2 -12   2    1.35    0.76 
   2 -12  -2   -0.15    0.46 
  -2  12   3  492.09    5.98 
   2  12  -3  495.45    4.98 
   2 -12   3  488.37    7.00 
  -2  12  -3  490.49    4.62 
   2  12   3  491.08    6.34 
   2  12   3  493.84    6.79 
   2 -12  -3  494.32    6.18 
  -2 -12   3  486.56    7.53 
   2 -12   4    0.24    0.24 
  -2  12   4   -0.10    0.22 
   2  12  -4    0.06    0.24 
   2  12   4    0.45    0.34 
   2 -12  -4    0.04    0.33 
   2  12   4    0.11    0.34 
  -2 -12   4    0.17    0.28 
  -2  12   5  217.19    4.02 
   2 -12   5  207.29    4.41 
  -2 -12   5  206.86    3.97 
   2  12   5  207.15    4.02 
   2  12   5  207.11    3.99 
   2 -12  -5  209.59    3.64 
   2 -12   6    0.66    0.39 
   2  12   6    0.33    0.34 
   2 -12  -6   -0.07    0.31 
   2 -12   7   59.16    2.29 
   2  12   7   59.12    2.16 
  -3  12   0   -0.13    0.20 
   3  12   0   -0.20    0.35 
  -3 -12   0   -0.31    0.36 
   3 -12   0    0.34    0.49 
   3 -12   1   14.97    1.29 
   3  12  -1   14.33    1.08 
  -3  12   1   13.69    1.05 
  -3 -12  -1   12.98    1.24 
  -3  12  -1   13.79    0.96 
  -3 -12   1   13.66    1.27 
   3  12   1   17.00    1.50 
   3 -12  -1   14.19    1.15 
   3  12  -2    7.80    0.68 
   3 -12   2    9.69    1.05 
  -3  12   2    9.44    0.93 
   3 -12  -2    9.92    1.17 
  -3 -12   2    7.02    1.21 
  -3  12  -2    8.42    0.68 
   3  12   2    7.41    1.16 
  -3  12   3   46.45    1.97 
   3 -12   3   51.23    2.19 
   3  12  -3   51.33    1.66 
   3  12   3   48.23    2.45 
   3  12   3   46.67    1.91 
   3 -12  -3   41.28    1.97 
  -3 -12   3   49.49    2.34 
   3 -12   4   17.82    1.30 
   3  12  -4   20.93    1.09 
  -3  12   4   18.07    1.28 
   3  12   4   20.00    1.35 
   3 -12  -4   19.87    1.30 
   3  12   4   18.02    1.43 
  -3 -12   4   19.29    1.37 
   3 -12   5   57.54    2.31 
   3  12  -5   54.89    1.69 
  -3 -12   5   54.38    2.04 
   3  12   5   57.84    2.15 
   3  12   5   58.23    2.12 
   3 -12   6    8.55    1.09 
   3  12   6    9.71    0.94 
   3 -12  -6    8.41    0.91 
   3 -12   7   34.98    1.81 
   3 -12  -7   33.77    1.62 
   3  12   7   37.08    1.84 
  -4  12   0    7.98    0.97 
   4  12   0    4.63    0.80 
  -4 -12   0    3.60    0.85 
   4 -12   0    5.07    0.79 
  -4  12   1    9.56    0.84 
  -4 -12  -1   10.32    1.12 
   4  12  -1    9.46    0.86 
   4 -12   1    7.92    0.80 
   4 -12  -1    8.01    1.04 
  -4 -12   1    9.88    1.10 
   4  12   1    8.36    1.16 
  -4  12  -1    8.75    0.70 
  -4  12   2    6.49    0.89 
   4 -12   2    6.19    0.92 
   4  12  -2    7.61    0.75 
   4 -12  -2    7.56    0.81 
  -4  12  -2    7.62    0.59 
   4  12   2    7.74    1.16 
   4  12   2    7.82    1.02 
  -4 -12   2    7.15    1.30 
   4 -12   3    3.25    0.67 
  -4  12   3    3.43    0.68 
   4  12  -3    3.41    0.56 
   4 -12  -3    2.44    0.59 
   4  12   3    3.05    0.67 
  -4 -12   3    3.45    0.83 
   4  12   3    5.00    1.13 
   4  12  -4    0.68    0.35 
  -4  12   4    0.47    0.34 
   4 -12   4    0.46    0.32 
   4  12   4    0.84    0.52 
  -4 -12   4    0.96    0.44 
   4  12   4    1.03    0.41 
   4  12  -5    0.93    0.38 
   4 -12   5    0.05    0.55 
   4  12   5    0.95    0.42 
   4 -12  -5    0.86    0.40 
   4 -12   6    6.65    1.01 
   4  12   6    5.07    0.81 
   4 -12  -6    5.38    0.78 
   4 -12   7    0.11    0.40 
   4  12   7    0.05    0.44 
   4 -12  -7    0.35    0.43 
   5 -12   0    0.14    0.26 
   5  12   0   -0.06    0.31 
  -5 -12   0    0.06    0.43 
  -5  12   0   -0.10    0.19 
   5  12  -1    3.70    0.69 
  -5 -12  -1    3.15    0.74 
  -5  12   1    4.27    0.63 
   5 -12   1    3.75    0.64 
  -5  12  -1    2.10    0.40 
   5  12   1    4.13    0.80 
  -5 -12   1    2.82    0.71 
   5 -12  -1    3.91    0.70 
   5 -12   2    3.73    0.65 
  -5  12   2    2.10    0.49 
   5  12  -2    4.66    0.72 
  -5  12  -2    2.68    0.34 
   5  12   2    2.58    0.65 
   5  12   2    2.99    0.78 
  -5 -12   2    2.79    0.99 
   5 -12  -2    2.71    0.58 
   5  12  -3   58.08    1.85 
   5 -12   3   57.04    2.20 
  -5  12   3   56.33    2.03 
   5  12   3   58.73    2.28 
   5  12   3   54.85    2.71 
  -5 -12   3   56.59    2.38 
   5 -12  -3   56.84    2.01 
   5  12  -4   13.26    0.92 
   5 -12   4   13.84    1.20 
   5  12   4   13.98    1.15 
   5  12   4   12.62    1.28 
   5  12  -5   55.51    1.74 
   5 -12   5   53.85    2.27 
   5  12   5   54.77    2.09 
   5 -12  -5   51.77    1.92 
   5 -12   6   13.02    1.22 
   5  12   6   11.37    1.07 
   5 -12  -6   11.10    0.99 
   6 -12   0    1.89    0.47 
   6  12   0    1.04    0.49 
  -6  12   0    1.34    0.38 
  -6 -12   0    1.55    0.61 
  -6 -12  -1  502.27    6.03 
   6  12  -1  496.80    5.89 
   6 -12   1  496.60    5.77 
  -6  12   1  501.08    5.46 
   6  12   1  499.97    6.65 
  -6  12  -1  502.03    4.39 
  -6 -12   1  502.32    6.35 
   6 -12  -1  501.38    5.08 
  -6  12   2    0.46    0.31 
   6  12  -2    0.29    0.31 
   6 -12   2    0.25    0.26 
   6  12   2    0.41    0.54 
  -6 -12   2   -0.20    0.59 
   6  12   2   -0.11    0.33 
   6 -12  -2    0.34    0.23 
   6 -12   3  328.08    5.14 
   6  12  -3  332.07    4.42 
  -6 -12   3  335.07    5.50 
   6  12   3  342.72    6.05 
   6  12   3  328.88    5.46 
   6 -12   4    0.39    0.36 
   6  12  -4    0.18    0.27 
   6  12   4    0.18    0.60 
   6 -12  -4   -0.08    0.29 
   6  12   4   -0.17    0.27 
   6 -12   5  131.99    3.39 
   6  12  -5  132.66    2.67 
   6 -12  -5  137.16    3.03 
   6  12   5  136.60    3.31 
   6 -12   6    0.03    0.29 
   6  12  -6   -0.07    0.29 
   6  12   6    0.46    0.38 
   6 -12  -6   -0.18    0.30 
  -7 -12   0   -0.04    0.42 
   7  12   0    0.04    0.31 
   7 -12   0    0.28    0.29 
   7  12  -1    4.90    0.73 
   7 -12   1    4.56    0.67 
  -7 -12  -1    4.36    0.79 
   7 -12   1    4.40    0.52 
  -7 -12   1    4.56    0.91 
   7 -12  -1    4.61    0.51 
   7  12   1    3.57    0.71 
   7  12  -2    3.48    0.65 
   7 -12   2    2.93    0.57 
  -7 -12   2    5.65    1.26 
   7 -12  -2    3.67    0.61 
   7  12   2    1.98    0.64 
   7  12   2    4.78    0.83 
   7 -12   3   19.72    1.24 
   7  12  -3   17.16    1.07 
   7  12   3   17.14    1.41 
   7 -12  -3   17.07    1.10 
   7  12   3   19.26    1.42 
   7  12  -4    9.84    0.86 
   7 -12   4    5.65    0.83 
   7  12   4    6.65    0.94 
   7 -12  -4    4.32    0.65 
   7  12  -5   26.34    1.27 
   7 -12   5   25.52    1.54 
   7  12   5   26.70    1.51 
   7 -12  -5   25.88    1.37 
   7 -12   6    9.22    1.32 
   7  12  -6    7.14    0.77 
   7 -12  -6    6.35    0.84 
   7  12   6    5.49    0.90 
   8 -12   0    4.99    0.64 
  -8 -12   0    5.29    0.88 
   8  12   0    4.27    0.69 
   8 -12   0    4.26    0.55 
   8  12  -1   10.93    0.88 
   8 -12   1   12.76    0.74 
   8 -12   1   10.85    0.83 
  -8 -12  -1   12.31    1.02 
  -8 -12   1   13.02    1.31 
   8  12   1   15.18    1.24 
   8 -12  -1   12.47    0.93 
   8 -12  -1   13.24    0.94 
   8 -12   2    1.34    0.45 
   8  12  -2    1.25    0.44 
   8 -12  -2    1.40    0.42 
   8  12   2    0.93    0.49 
   8  12   2    1.01    0.56 
   8  12  -3    5.39    0.74 
   8 -12   3    6.55    0.88 
   8  12   3    6.51    1.04 
   8 -12  -3    5.54    0.74 
   8  12   3    4.50    0.80 
   8  12  -4    0.88    0.39 
   8 -12   4    0.80    0.40 
   8  12   4    1.24    0.47 
   8 -12  -4    0.89    0.40 
   8  12  -5    2.77    0.55 
   8 -12   5    3.34    0.72 
   8 -12  -5    2.68    0.59 
   8  12   5    4.00    0.75 
   8 -12   6    3.34    0.78 
   8  12  -6    2.64    0.56 
   8 -12  -6    2.51    0.61 
   8  12   6    2.81    0.65 
   9 -12   0   -0.26    0.19 
   9 -12   0    0.27    0.21 
  -9 -12   0   -0.27    0.31 
   9  12   0   -0.25    0.28 
  -9 -12  -1    5.09    0.77 
   9 -12   1    5.58    0.62 
   9 -12   1    5.15    0.58 
   9  12  -1    4.58    0.75 
   9  12   1    5.50    0.76 
   9 -12  -1    5.00    0.65 
  -9 -12   1    6.74    1.17 
   9  12  -2    2.73    0.54 
   9 -12   2    3.14    0.57 
   9  12   2    2.88    0.70 
   9  12   2    4.54    0.87 
   9 -12  -2    2.22    0.59 
   9  12  -3   22.19    1.20 
   9 -12   3   23.36    1.29 
   9  12   3   24.40    1.76 
   9 -12  -3   25.40    1.35 
   9  12   3   22.69    1.42 
   9 -12   4    5.63    0.82 
   9  12  -4    5.25    0.70 
   9  12   4    4.63    0.73 
   9 -12  -4    5.35    0.74 
   9 -12   5   32.90    1.60 
   9  12  -5   35.57    1.46 
   9  12   5   34.95    1.71 
   9 -12  -5   34.56    1.59 
  10  12   0    0.60    0.42 
  10 -12   0    0.50    0.32 
 -10 -12   0    1.06    0.45 
  10  12  -1  215.55    3.79 
 -10 -12  -1  218.05    3.97 
  10 -12   1  213.64    3.32 
  10  12   1  213.58    4.09 
  10 -12  -1  213.98    3.35 
  10 -12   2    0.19    0.30 
  10  12  -2   -0.05    0.22 
  10 -12  -2    0.09    0.28 
  10  12   2    0.27    0.33 
  10  12   2   -0.01    0.13 
  10  12  -3  136.04    2.85 
  10 -12   3  134.20    2.92 
  10 -12  -3  136.21    2.80 
  10  12   3  135.51    3.21 
  10 -12   4    0.03    0.28 
  10  12  -4   -0.53    0.21 
  10 -12  -4   -0.31    0.23 
  10  12   4    0.14    0.36 
  10 -12   5   66.81    2.36 
  10  12  -5   69.42    2.09 
  10  12   5   66.57    2.31 
  10 -12  -5   67.57    2.14 
  11  12   0    0.32    0.36 
  11  12  -1    0.47    0.29 
 -11 -12  -1    0.29    0.37 
  11 -12  -1    0.27    0.30 
  11  12   1    0.64    0.53 
  11  12  -2    0.88    0.36 
  11 -12   2    1.12    0.40 
  11  12   2    0.60    0.46 
  11 -12  -2    0.38    0.31 
  11  12   2    1.47    0.72 
  11 -12   3    4.40    0.69 
  11  12  -3    5.12    0.70 
  11  12   3    5.67    0.78 
  11 -12  -3    4.55    0.68 
  11  12  -4    2.14    0.50 
  11 -12   4    2.22    0.57 
  11  12   4    3.29    0.69 
  11 -12  -4    2.00    0.49 
  12  12   0    0.38    0.39 
 -12 -12  -1    7.62    1.05 
  12  12  -1    9.08    0.85 
  12  12   1    8.90    1.09 
  12 -12  -1    9.28    0.82 
  12  12  -2    0.51    0.30 
  12 -12   2    0.10    0.27 
  12 -12  -2    0.22    0.31 
  12  12  -3    7.88    0.80 
  12 -12   3    7.98    0.76 
  12  12   3    8.83    1.09 
  12 -12  -3    5.67    0.84 
  12 -12   4    0.81    0.39 
  12  12  -4    0.51    0.33 
  12  12   4    0.66    0.51 
  12 -12  -4    0.59    0.36 
  13  12   0    0.31    0.33 
  13  12  -1    1.35    0.43 
  13 -12  -1    2.40    0.50 
  13  12   1    3.04    0.56 
 -13 -12  -2    1.06    0.59 
  13  12  -2    1.23    0.43 
  13 -12  -2    1.31    0.38 
  13 -12   3    9.10    0.78 
  13  12  -3   10.61    0.90 
  13 -12  -3   10.63    0.91 
  13  12   3    8.79    1.00 
  14  12   0   -0.05    0.33 
  14  12  -1   69.38    2.12 
  14 -12  -1   67.22    2.54 
  14  12   1   71.01    2.66 
   0  13   0    0.49    0.40 
   0 -13   0   -0.02    0.32 
   0 -13   1   27.67    2.16 
   0  13  -1   26.38    1.54 
   0 -13  -1   26.83    2.02 
   0  13   1   23.03    1.71 
   0  13  -2    0.07    0.32 
   0 -13  -2    0.13    0.45 
   0  13   2    0.65    0.52 
   0 -13   2   -0.47    0.30 
   0 -13  -3   10.37    0.99 
   0  13  -3   11.24    0.86 
   0  13   3   12.95    1.29 
   0 -13   3   11.71    1.50 
   0 -13   4   -0.03    0.31 
   0  13  -4   -0.05    0.29 
   0  13   4    0.20    0.34 
   0  13   5    5.73    0.87 
   0 -13   5    5.75    0.94 
   0  13   6   -0.15    0.28 
   0 -13   6   -0.28    0.26 
   0 -13   7    0.99    0.54 
  -1  13   0    0.59    0.43 
   1  13   0    0.33    0.38 
  -1 -13   0    0.11    0.41 
   1 -13   0    0.08    0.39 
  -1 -13  -1    3.16    0.84 
   1 -13   1    2.24    0.89 
   1  13  -1    3.01    0.69 
  -1  13   1    2.58    0.70 
  -1  13  -1    2.76    0.63 
   1 -13  -1    2.49    0.69 
  -1 -13   1    2.05    0.85 
   1  13   1    3.17    0.75 
  -1  13   2    0.36    0.37 
  -1 -13  -2    0.48    0.51 
   1  13  -2    0.54    0.34 
   1 -13   2    0.01    0.37 
   1 -13  -2    0.16    0.44 
   1  13   2    0.11    0.40 
  -1  13  -2    0.76    0.40 
  -1 -13   2    0.12    0.54 
  -1 -13  -3    2.42    0.62 
  -1  13   3    2.29    0.64 
   1 -13   3    2.26    0.60 
   1  13  -3    2.10    0.48 
  -1  13  -3    1.85    0.50 
  -1 -13   3    1.44    0.72 
   1  13   3    1.61    0.70 
   1 -13  -3    1.70    0.54 
   1  13  -4    0.18    0.26 
   1 -13   4    0.27    0.31 
  -1  13   4    0.02    0.24 
  -1 -13   4   -0.52    0.29 
   1 -13  -4    0.02    0.32 
   1  13   4    0.12    0.33 
   1  13   4    0.32    0.33 
   1 -13   5    5.74    0.90 
  -1  13   5    4.06    0.78 
   1  13   5    6.05    0.87 
  -1 -13   5    6.19    0.95 
   1 -13  -5    4.94    0.75 
   1  13   5    5.43    0.80 
   1 -13   6    1.07    0.46 
   1  13   6    0.35    0.36 
  -1 -13   6    0.84    0.44 
   1 -13   7    3.28    0.75 
  -2 -13   0   24.97    1.84 
   2  13   0   19.88    1.45 
   2 -13   0   21.86    1.68 
  -2  13   0   21.22    1.34 
   2 -13   1    9.93    1.33 
  -2  13   1    6.25    0.86 
   2  13  -1    7.14    0.91 
  -2 -13  -1    6.37    0.95 
  -2 -13   1    6.54    1.01 
   2 -13  -1    5.19    0.88 
  -2  13  -1    8.74    1.05 
   2  13   1    6.44    0.98 
  -2  13   2   20.26    1.34 
  -2 -13  -2   19.89    1.37 
   2 -13   2   20.70    1.60 
   2  13  -2   21.91    1.20 
   2 -13  -2   20.27    1.75 
  -2 -13   2   22.57    1.98 
  -2  13  -2   21.24    1.17 
   2  13   2   22.71    1.73 
   2 -13   3    6.66    1.08 
  -2  13   3    6.97    0.98 
   2  13  -3    6.96    0.67 
   2  13   3    6.29    1.09 
  -2  13  -3    7.82    0.71 
   2 -13  -3    7.88    1.14 
  -2 -13   3    7.76    1.23 
   2 -13   4    4.88    0.84 
   2  13  -4    5.74    0.56 
  -2  13   4    4.77    0.77 
   2 -13  -4    5.40    0.81 
  -2 -13   4    6.82    1.05 
   2  13   4    6.86    1.06 
   2  13   4    5.60    0.82 
   2 -13   5    2.41    0.66 
  -2  13   5    2.56    0.59 
  -2 -13   5    3.98    0.71 
   2 -13  -5    1.46    0.53 
   2  13   5    1.12    0.40 
   2  13   5    2.48    0.58 
   2 -13   6    2.95    0.67 
   2  13   6    2.23    0.56 
   2 -13  -6    3.89    0.75 
   2 -13   7    0.34    0.45 
   2  13   7    0.42    0.47 
  -3  13   0   -0.02    0.25 
   3  13   0   -0.11    0.36 
  -3 -13   0   -0.21    0.48 
   3 -13   0   -0.10    0.40 
   3 -13   1    1.83    0.45 
  -3 -13  -1    2.36    0.70 
   3  13  -1    2.05    0.60 
  -3  13   1    1.28    0.46 
   3  13   1    1.19    0.68 
  -3 -13   1    1.17    0.57 
  -3  13  -1    1.79    0.49 
   3 -13  -1    0.49    0.64 
  -3  13   2    0.42    0.34 
   3 -13   2   -0.07    0.30 
   3  13  -2    0.25    0.35 
  -3 -13  -2    0.57    0.43 
  -3 -13   2    0.81    0.65 
   3 -13  -2    0.43    0.45 
  -3  13  -2    0.14    0.27 
   3  13   2    0.02    0.40 
   3 -13   3    8.39    0.89 
  -3  13   3    8.03    0.89 
   3  13  -3    8.35    0.81 
  -3 -13   3    8.97    1.24 
   3  13   3    9.22    1.36 
   3  13   3    6.40    0.99 
   3 -13  -3   11.58    1.44 
  -3  13   4    0.45    0.39 
   3 -13   4    0.04    0.29 
   3  13  -4   -0.35    0.16 
   3  13   4   -0.21    0.20 
   3  13   4    0.32    0.38 
  -3 -13   4   -0.19    0.30 
   3 -13  -4    0.17    0.40 
   3  13  -5   12.07    0.85 
   3 -13   5   13.31    1.22 
  -3  13   5   12.31    1.07 
  -3 -13   5   12.07    1.08 
   3  13   5   11.47    1.02 
   3  13   5   11.90    1.13 
   3 -13   6    0.07    0.30 
   3 -13  -6    0.50    0.39 
   3  13   6    0.12    0.31 
   3 -13   7    6.83    1.05 
   3  13   7    6.73    0.89 
   3 -13  -7    7.61    0.91 
   4 -13   0    1.99    0.63 
  -4  13   0    1.41    0.39 
   4  13   0    1.68    0.55 
  -4 -13   0    1.61    0.74 
   4 -13   1   17.35    1.26 
  -4 -13  -1   17.51    1.36 
   4  13  -1   17.12    1.25 
  -4  13   1   17.82    1.21 
  -4  13  -1   17.18    0.98 
   4  13   1   16.67    1.38 
   4 -13  -1   16.81    1.29 
  -4 -13   1   15.20    1.36 
   4  13  -2    3.87    0.62 
   4 -13   2    2.93    0.67 
  -4  13   2    3.45    0.66 
   4 -13  -2    4.93    0.76 
   4  13   2    4.49    0.87 
  -4  13  -2    3.95    0.49 
  -4 -13   2    3.43    1.14 
  -4  13   3   15.82    1.16 
   4 -13   3   13.95    1.15 
   4  13  -3   14.07    1.01 
   4 -13  -3   15.16    1.08 
   4  13   3   14.26    1.54 
   4  13   3   14.08    1.14 
  -4 -13   3   13.26    1.38 
  -4  13   4    0.28    0.31 
   4 -13   4    0.10    0.28 
   4  13  -4    0.70    0.31 
   4  13   4    0.52    0.38 
  -4 -13   4    0.63    0.38 
   4  13   4    0.50    0.55 
   4 -13   5    0.79    0.40 
   4  13  -5    1.06    0.34 
   4  13   5    2.01    0.58 
   4 -13   6   -0.16    0.30 
   4  13   6    0.37    0.29 
   4 -13  -6    0.34    0.37 
   4 -13   7    0.55    0.64 
   4  13   7   -0.04    0.40 
   4 -13  -7    0.82    0.46 
  -5  13   0   -0.11    0.21 
   5 -13   0   -0.02    0.31 
   5  13   0   -0.14    0.27 
  -5 -13   0   -0.27    0.31 
   5 -13   1    0.49    0.32 
   5  13  -1    0.21    0.33 
  -5  13   1    0.03    0.23 
  -5 -13  -1   -0.16    0.29 
  -5  13  -1    0.09    0.23 
  -5 -13   1    0.04    0.43 
   5  13   1    0.35    0.50 
   5 -13  -1   -0.29    0.23 
  -5  13   2   -0.02    0.25 
   5  13  -2    0.63    0.37 
   5 -13   2    0.52    0.34 
  -5 -13   2    0.38    0.59 
  -5  13  -2    0.70    0.24 
   5  13   2    0.65    0.51 
   5 -13  -2    1.05    0.49 
   5 -13   3    0.69    0.36 
  -5  13   3    0.78    0.34 
   5  13  -3    0.65    0.32 
   5  13   3    1.32    0.45 
  -5 -13   3    1.15    0.65 
   5  13   3    0.75    0.49 
   5 -13  -3    0.79    0.39 
   5  13  -4    2.66    0.52 
   5 -13   4    3.40    0.73 
   5  13   4    2.83    0.64 
   5  13   4    0.63    0.55 
   5 -13   5   -0.35    0.21 
   5  13  -5    0.13    0.24 
   5  13   5    0.17    0.33 
   5 -13  -5   -0.10    0.30 
   5 -13   6    1.50    0.57 
   5 -13  -6    1.23    0.50 
   5  13   6    0.28    0.47 
   6  13   0   10.62    0.86 
  -6 -13   0    9.54    1.02 
  -6  13   0   11.46    0.78 
   6 -13   0   10.74    0.80 
   6 -13   1   52.21    1.93 
   6  13  -1   49.26    1.88 
  -6  13   1   54.93    1.83 
  -6 -13  -1   55.29    2.18 
  -6 -13   1   54.32    2.21 
   6  13   1   53.48    2.45 
  -6  13  -1   54.60    1.53 
   6 -13  -1   55.67    1.82 
  -6  13   2   11.74    0.95 
   6  13  -2   10.24    0.95 
   6 -13   2   10.99    0.95 
   6 -13  -2   10.60    0.81 
   6  13   2   10.52    1.13 
   6  13   2   11.38    1.25 
  -6 -13   2    9.57    1.51 
   6 -13   3   31.07    1.64 
   6  13  -3   28.32    1.34 
  -6 -13   3   28.48    1.84 
   6  13   3   27.26    1.66 
   6  13   3   27.95    1.75 
   6  13  -4    5.87    0.75 
   6 -13   4    6.40    0.96 
   6  13   4    7.10    0.98 
   6 -13  -4    5.74    0.80 
   6  13   4    5.81    1.07 
   6 -13   5   12.79    1.08 
   6  13  -5   12.91    0.96 
   6  13   5   11.75    1.14 
   6 -13  -5   11.28    1.00 
   6  13  -6    3.16    0.59 
   6 -13   6    1.90    0.59 
   6  13   6    1.53    0.55 
   6 -13  -6    1.21    0.56 
   7 -13   0    0.22    0.28 
  -7 -13   0   -0.19    0.34 
   7  13   0   -0.03    0.30 
   7  13  -1    2.55    0.54 
  -7 -13  -1    2.63    0.65 
   7 -13   1    2.99    0.55 
  -7 -13   1    3.22    0.69 
   7 -13  -1    2.18    0.45 
   7  13   1    2.07    0.60 
   7 -13   2    0.13    0.27 
   7  13  -2    0.11    0.24 
   7  13   2    0.00    0.39 
   7  13   2   -0.03    0.43 
  -7 -13   2   -0.30    0.51 
   7 -13   3    8.58    0.89 
   7  13  -3    5.02    0.72 
   7  13   3    7.52    1.05 
   7  13   3    7.70    1.15 
   7 -13  -3    8.63    0.83 
   7  13  -4    0.27    0.29 
   7 -13   4    0.07    0.33 
   7  13   4    0.15    0.39 
   7 -13  -4    0.37    0.38 
   7 -13   5   13.93    1.19 
   7  13  -5   13.71    0.97 
   7 -13  -5   14.76    1.12 
   7  13   5   14.09    1.25 
   7 -13   6    0.55    0.47 
   7  13  -6    0.61    0.38 
   7  13   6    0.51    0.45 
   7 -13  -6    0.55    0.41 
   8 -13   0    6.96    0.67 
   8  13   0    7.11    1.02 
   8 -13   0    5.86    0.62 
  -8 -13   0    4.68    0.87 
   8 -13   1   11.64    0.88 
  -8 -13  -1   13.53    1.17 
   8 -13   1   10.49    0.68 
   8  13  -1   12.54    1.03 
   8  13   1   12.74    1.10 
  -8 -13   1   13.01    1.21 
   8 -13  -1    8.63    0.91 
   8 -13  -1   11.56    0.85 
   8  13  -2    5.39    0.83 
   8 -13   2    5.89    0.82 
   8  13   2    3.96    0.75 
   8  13   2    5.04    1.00 
   8 -13  -2    4.78    0.68 
   8 -13   3    3.02    0.60 
   8  13  -3    3.70    0.65 
   8  13   3    5.43    0.99 
   8  13   3    3.82    0.74 
   8 -13  -3    2.57    0.56 
   8 -13   4    1.80    0.49 
   8  13  -4    1.78    0.49 
   8 -13  -4    1.60    0.46 
   8  13   4    2.23    0.60 
   8 -13   5    1.48    0.52 
   8  13  -5    1.42    0.45 
   8  13   5    1.82    0.57 
   8 -13  -5    2.26    0.55 
   8 -13   6    0.13    0.43 
   8  13  -6    0.47    0.38 
   8 -13  -6   -0.32    0.32 
   8  13   6   -0.07    0.34 
  -9 -13   0    0.16    0.37 
   9 -13   0    0.01    0.24 
   9  13   0   -0.28    0.30 
   9 -13   0   -0.06    0.21 
   9  13  -1    0.42    0.33 
   9 -13   1    0.32    0.30 
  -9 -13  -1   -0.01    0.31 
   9 -13  -1    0.26    0.29 
  -9 -13   1    0.27    0.52 
   9  13   1   -0.22    0.23 
   9 -13   2    1.82    0.45 
   9  13  -2    3.13    0.63 
   9  13   2    1.38    0.63 
   9 -13  -2    1.19    0.47 
   9  13   2    2.67    0.65 
   9  13  -3    0.30    0.33 
   9 -13   3    0.15    0.29 
   9  13   3    0.42    0.36 
   9  13   3   -0.24    0.45 
   9 -13  -3    0.51    0.32 
   9  13  -4    1.99    0.49 
   9 -13   4    2.65    0.59 
   9  13   4    2.65    0.64 
   9 -13  -4    1.99    0.48 
   9  13  -5    0.58    0.34 
   9 -13   5    0.23    0.34 
   9  13   5    0.50    0.42 
   9 -13  -5    0.65    0.43 
  10  13   0    8.82    0.89 
  10 -13   0    9.35    0.77 
 -10 -13   0    8.13    0.88 
  10  13  -1   61.15    2.22 
 -10 -13  -1   53.63    2.05 
  10 -13   1   59.10    1.83 
  10 -13  -1   58.26    1.85 
  10  13   1   55.20    2.20 
  10  13  -2    3.66    0.67 
  10 -13   2    4.69    0.71 
  10 -13  -2    4.63    0.71 
  10  13   2    5.57    0.94 
  10 -13   3   37.90    1.61 
  10  13  -3   40.03    1.65 
  10  13   3   38.62    1.76 
  10 -13  -3   40.85    1.65 
  10  13  -4    3.89    0.64 
  10 -13   4    3.48    0.70 
  10 -13  -4    2.93    0.59 
  10  13   4    2.84    0.64 
  10 -13   5   21.25    1.49 
  10  13  -5   19.30    1.19 
  10  13   5   19.38    1.35 
  10 -13  -5   18.28    1.23 
  11  13   0   -0.09    0.29 
  11  13  -1    0.50    0.35 
 -11 -13  -1   -0.31    0.24 
  11  13   1    0.67    0.56 
  11 -13  -1    0.13    0.32 
  11 -13   2    0.27    0.29 
  11  13  -2   -0.01    0.23 
  11 -13  -2    0.07    0.31 
  11  13   2   -0.53    0.45 
  11 -13   3    9.47    0.88 
  11  13  -3    7.94    0.82 
  11  13   3    8.16    0.88 
  11 -13  -3    8.21    0.81 
  11  13  -4    0.46    0.34 
  11 -13   4    0.97    0.46 
  11 -13  -4    0.86    0.34 
  11  13   4    0.66    0.40 
  12  13   0    4.59    0.76 
 -12 -13  -1    2.19    0.55 
  12  13  -1    2.85    0.60 
  12  13   1    4.54    0.83 
  12 -13  -1    7.16    0.73 
  12 -13   2    3.68    0.61 
 -12 -13  -2    4.28    0.63 
  12  13  -2    3.31    0.62 
  12 -13  -2    5.26    0.68 
  12 -13   3    1.89    0.55 
  12  13  -3    2.61    0.53 
  12 -13  -3    1.78    0.53 
  12  13   3    2.23    0.65 
  13  13   0   -0.05    0.29 
  13  13  -1   -0.15    0.28 
  13  13   1    0.52    0.47 
  13 -13  -1    0.28    0.32 
  13  13  -2    0.84    0.38 
 -13 -13  -2    0.50    0.45 
  13 -13  -2    0.79    0.39 
  13 -13   3    0.42    0.33 
  13  13  -3    0.67    0.40 
  13 -13  -3    0.46    0.36 
  14  13   0    3.08    0.65 
  14  13  -1   40.72    1.58 
  14  13   1   42.78    1.79 
   0 -14   0   12.78    1.22 
   0  14   0   15.33    1.27 
   0  14  -1    0.14    0.40 
   0  14   1    0.43    0.41 
   0 -14  -1    0.53    0.61 
   0 -14   1    0.10    0.61 
   0 -14   2    5.29    1.17 
   0 -14  -2    3.85    0.85 
   0  14  -2    6.09    0.95 
   0  14   2    5.18    1.03 
   0 -14  -3   -0.13    0.37 
   0  14  -3    0.02    0.31 
   0  14   3    0.25    0.41 
   0 -14   3    0.02    0.38 
   0  14  -4    4.03    0.58 
   0 -14  -4    4.63    0.87 
   0  14   4    3.90    0.78 
   0 -14   4    4.60    0.96 
   0 -14  -5   -0.22    0.25 
   0  14   5    0.05    0.35 
   0 -14   5    0.32    0.37 
   0  14   6    3.38    0.65 
   0 -14   6    4.81    0.90 
   0 -14  -6    3.90    0.85 
   0 -14   7    0.77    0.54 
   1  14   0   -0.13    0.33 
  -1  14   0    0.01    0.31 
  -1 -14   0   -0.26    0.29 
   1 -14   0    0.01    0.41 
   1 -14   1    0.01    0.40 
  -1 -14  -1    0.25    0.55 
   1  14  -1    0.59    0.41 
  -1  14   1   -0.17    0.34 
   1  14   1    0.14    0.30 
   1 -14  -1    0.41    0.41 
  -1  14  -1   -0.08    0.30 
  -1 -14   1    0.83    0.62 
   1  14  -2    0.37    0.41 
   1 -14   2    0.46    0.55 
  -1  14   2    0.87    0.45 
  -1 -14  -2    1.03    0.57 
   1 -14  -2    1.07    0.68 
  -1  14  -2    0.37    0.39 
   1  14   2    0.43    0.51 
  -1 -14   2    0.73    0.71 
  -1 -14  -3    0.15    0.42 
   1  14  -3    0.52    0.30 
  -1  14   3    0.21    0.35 
   1 -14   3   -0.10    0.39 
   1  14   3    0.08    0.42 
  -1 -14   3    0.33    0.51 
   1 -14  -3   -0.16    0.36 
  -1  14  -3    0.22    0.35 
  -1  14   4    0.08    0.31 
   1  14  -4   -0.08    0.17 
   1 -14   4    0.22    0.40 
   1  14   4   -0.36    0.26 
  -1 -14   4   -0.22    0.33 
   1 -14  -4    0.37    0.36 
  -1  14   5    2.35    0.61 
   1 -14   5    1.50    0.57 
  -1 -14   5    2.40    0.73 
   1  14   5    2.44    0.56 
   1 -14  -5    2.63    0.61 
   1 -14   6   -0.16    0.30 
  -1  14   6    0.09    0.42 
   1  14   6   -0.10    0.38 
  -1 -14   6    0.44    0.36 
   1 -14   7    1.03    0.59 
  -2 -14   0    0.22    0.46 
   2  14   0    0.07    0.42 
   2 -14   0    0.58    0.43 
  -2  14   0    0.55    0.38 
  -2 -14  -1   -0.01    0.39 
  -2  14   1   -0.36    0.25 
   2  14  -1    0.02    0.33 
   2 -14   1    0.36    0.48 
  -2 -14   1    0.23    0.52 
   2 -14  -1    0.21    0.37 
  -2  14  -1   -0.20    0.31 
   2  14   1   -0.01    0.31 
  -2 -14  -2    0.13    0.44 
   2  14  -2   -0.14    0.21 
   2 -14   2   -0.03    0.40 
  -2  14   2    0.01    0.25 
  -2 -14   2    0.40    0.57 
   2 -14  -2   -0.69    0.43 
  -2  14  -2    0.44    0.31 
   2  14   2    0.55    0.51 
  -2  14   3    1.16    0.48 
   2 -14   3    1.40    0.60 
  -2 -14  -3    0.36    0.47 
   2  14  -3    1.44    0.51 
   2  14   3    0.79    0.61 
  -2  14  -3    1.15    0.42 
  -2 -14   3    0.81    0.57 
   2 -14  -3    0.53    0.51 
   2  14  -4    1.32    0.39 
   2 -14   4    0.44    0.39 
  -2  14   4    0.97    0.48 
  -2 -14   4    1.42    0.62 
   2  14   4    0.57    0.40 
   2  14   4    0.30    0.35 
   2 -14  -4    1.17    0.54 
   2 -14   5    3.04    0.72 
  -2  14   5    4.21    0.75 
   2  14   5    2.68    0.64 
   2 -14  -5    3.26    0.65 
  -2 -14   5    4.43    0.86 
   2  14   5    3.95    0.85 
   2 -14   6   -0.03    0.30 
  -2 -14   6    0.02    0.62 
   2  14   6    0.18    0.36 
   2 -14   7    1.74    0.66 
   2  14   7    2.45    0.61 
  -3  14   0    0.26    0.30 
   3  14   0   -0.14    0.38 
   3 -14   0   -0.04    0.35 
  -3 -14   0    0.12    0.55 
  -3  14   1    0.93    0.46 
   3  14  -1    0.84    0.42 
  -3 -14  -1    0.97    0.54 
   3 -14   1    1.18    0.48 
  -3  14  -1    0.84    0.42 
   3  14   1    0.74    0.52 
   3 -14  -1    2.05    0.68 
  -3 -14   1    1.18    0.56 
   3 -14   2    0.72    0.43 
   3  14  -2    0.45    0.40 
  -3  14   2    0.39    0.33 
  -3 -14  -2    0.48    0.46 
   3 -14  -2    0.05    0.32 
  -3 -14   2    0.63    0.69 
   3  14   2   -0.22    0.39 
  -3  14  -2    0.50    0.34 
   3 -14   3    0.07    0.33 
  -3  14   3   -0.39    0.20 
   3  14  -3    0.01    0.23 
   3 -14  -3    0.29    0.48 
   3  14   3   -0.34    0.50 
  -3 -14   3   -0.26    0.41 
   3  14  -4    0.25    0.27 
   3 -14   4    0.32    0.35 
  -3  14   4   -0.11    0.26 
   3 -14  -4   -0.22    0.41 
   3  14   4    0.04    0.24 
  -3 -14   4    0.58    0.40 
   3  14   4    0.68    0.50 
  -3  14   5    1.11    0.42 
   3 -14   5    0.21    0.41 
   3  14  -5   -0.18    0.29 
   3  14   5   -0.06    0.41 
   3  14   5    0.33    0.36 
  -3 -14   5    0.35    0.29 
   3 -14   6   -0.22    0.30 
   3 -14  -6    0.58    0.42 
   3  14   6   -0.14    0.26 
   3 -14   7   -0.32    0.42 
   3  14   7   -0.13    0.35 
   3 -14  -7    0.04    0.34 
  -4 -14   0    3.36    0.91 
   4 -14   0    3.42    0.74 
   4  14   0    3.01    0.80 
  -4  14   0    3.26    0.60 
   4  14  -1    1.87    0.49 
   4 -14   1    2.17    0.67 
  -4  14   1    3.09    0.67 
  -4 -14  -1    1.04    0.62 
   4  14   1    2.34    0.78 
   4 -14  -1    2.66    0.70 
  -4  14  -1    3.26    0.55 
  -4 -14   1    2.43    0.70 
   4  14  -2    1.87    0.50 
   4 -14   2    1.58    0.50 
  -4 -14  -2    1.61    0.55 
  -4  14   2    2.48    0.52 
  -4 -14   2    1.62    0.82 
   4  14   2    2.16    0.68 
   4 -14  -2    2.50    0.54 
  -4  14  -2    2.85    0.46 
   4 -14   3    0.98    0.49 
  -4  14   3    1.98    0.55 
   4  14  -3    1.57    0.47 
   4 -14  -3    0.97    0.50 
  -4 -14   3    1.25    0.34 
   4  14   3    2.15    0.79 
   4  14   3    1.07    0.51 
  -4  14   4    1.87    0.54 
   4  14  -4    3.60    0.61 
   4 -14   4    2.91    0.70 
  -4 -14   4    3.38    0.71 
   4  14   4    2.98    0.90 
   4  14   4    2.56    0.65 
   4 -14   5    0.64    0.37 
   4  14  -5    0.30    0.27 
   4  14   5    0.43    0.33 
   4  14   5    0.19    0.46 
   4 -14   6    2.63    0.68 
   4  14   6    2.14    0.55 
   4 -14  -6    2.57    0.63 
   5  14   0    0.33    0.38 
   5 -14   0   -0.03    0.31 
  -5 -14   0   -0.25    0.47 
  -5  14   0   -0.07    0.24 
   5 -14   1    0.99    0.41 
  -5 -14  -1    0.79    0.51 
   5  14  -1    1.31    0.53 
  -5  14   1    1.04    0.40 
  -5 -14   1    1.01    0.44 
  -5  14  -1    0.84    0.33 
   5  14   1    1.55    0.67 
   5 -14  -1    0.98    0.42 
   5  14  -2    0.33    0.35 
   5 -14   2    0.87    0.42 
  -5  14   2    0.59    0.36 
  -5 -14  -2    0.68    0.50 
   5 -14  -2    0.40    0.37 
  -5  14  -2    0.39    0.24 
  -5 -14   2    0.68    0.57 
   5  14   2    0.52    0.48 
   5 -14   3    2.28    0.63 
   5  14  -3    1.92    0.44 
  -5  14   3    1.87    0.53 
   5  14   3    2.18    0.79 
   5  14   3    2.84    0.73 
   5 -14  -3    2.21    0.53 
  -5 -14   3    2.88    0.88 
   5  14  -4    0.06    0.23 
   5 -14   4   -0.46    0.22 
  -5  14   4   -0.02    0.24 
   5  14   4    0.24    0.52 
  -5 -14   4   -0.04    0.47 
   5  14   4   -0.04    0.25 
   5  14  -5    1.36    0.41 
   5 -14   5    2.11    0.62 
   5 -14  -5    1.26    0.48 
   5  14   5    1.18    0.50 
   5 -14   6    0.48    0.45 
   5 -14  -6    0.05    0.30 
   6 -14   0    2.17    0.50 
  -6  14   0    1.78    0.43 
   6  14   0    1.34    0.44 
  -6 -14   0    1.77    0.66 
  -6  14   1    0.32    0.28 
   6 -14   1    0.38    0.33 
  -6 -14  -1    0.34    0.36 
   6  14  -1    0.07    0.32 
  -6 -14   1   -0.10    0.38 
  -6  14  -1    0.10    0.19 
   6 -14  -1    0.54    0.44 
   6  14   1   -0.21    0.39 
   6 -14   2    0.66    0.40 
  -6  14   2    0.79    0.38 
   6  14  -2    0.37    0.33 
   6 -14  -2    0.35    0.34 
  -6 -14   2    0.16    0.43 
   6  14   2   -0.68    0.42 
   6  14  -3    0.00    0.26 
   6 -14   3    0.18    0.30 
  -6  14   3   -0.03    0.22 
  -6 -14   3    0.17    0.50 
   6  14   3    0.13    0.29 
   6  14   3    0.47    0.45 
   6 -14   4    0.20    0.38 
   6  14  -4    0.07    0.26 
   6  14   4    0.19    0.34 
   6  14   4    0.12    0.54 
   6 -14  -4    0.29    0.39 
   6  14  -5    0.66    0.35 
   6 -14   5    0.60    0.39 
   6 -14  -5    0.63    0.42 
   6  14   5    0.41    0.29 
   6  14  -6   -0.13    0.30 
   6 -14   6    0.50    0.38 
   6  14   6    0.45    0.40 
   6 -14  -6    0.32    0.35 
   7  14   0   -0.14    0.22 
   7 -14   0   -0.12    0.24 
  -7  14   0    0.05    0.19 
  -7 -14   0    0.50    0.56 
  -7 -14  -1    0.29    0.43 
  -7  14   1    0.57    0.28 
   7  14  -1    0.14    0.29 
   7 -14   1    0.35    0.31 
  -7 -14   1    0.38    0.35 
   7 -14  -1   -0.13    0.22 
   7  14   1    0.34    0.41 
   7  14  -2    0.22    0.30 
   7 -14   2   -0.08    0.23 
   7  14   2   -0.22    0.42 
  -7 -14   2    0.57    0.63 
   7 -14   3    0.08    0.30 
   7  14  -3    0.59    0.35 
   7 -14  -3    0.92    0.42 
   7  14   3    1.28    0.57 
   7  14   3    0.31    0.55 
   7  14  -4    0.44    0.32 
   7 -14   4    0.69    0.39 
   7  14   4    0.75    0.52 
   7 -14  -4    0.87    0.43 
   7 -14   5   -0.22    0.33 
   7  14  -5    0.24    0.29 
   7  14   5    0.35    0.33 
   7 -14  -5    0.60    0.39 
   7 -14   6    0.71    0.43 
   7  14  -6    0.90    0.38 
   7 -14  -6   -0.49    0.25 
   7  14   6   -0.31    0.29 
   8  14   0    0.32    0.36 
  -8 -14   0   -0.10    0.26 
   8 -14   0    0.22    0.22 
   8 -14   0    0.44    0.27 
   8  14  -1    5.01    0.75 
   8 -14   1    5.27    0.73 
   8 -14   1    5.37    0.63 
  -8 -14  -1    4.06    0.80 
   8 -14  -1    4.31    0.78 
   8 -14  -1    4.86    0.67 
  -8 -14   1    5.68    0.85 
   8  14   1    4.16    0.75 
   8  14  -2    0.12    0.27 
   8 -14   2    0.22    0.29 
   8  14   2    0.56    0.54 
   8 -14  -2    0.24    0.33 
   8 -14   3    2.15    0.55 
   8  14  -3    2.26    0.50 
   8  14   3    3.81    0.79 
   8 -14  -3    2.25    0.54 
   8  14   3    4.10    0.76 
   8  14  -4    0.72    0.37 
   8 -14   4    1.61    0.53 
   8 -14  -4    1.18    0.46 
   8  14   4    1.68    0.55 
   8  14  -5    1.03    0.43 
   8 -14   5    0.17    0.32 
   8 -14  -5    0.75    0.45 
   8  14   5    0.40    0.38 
   9 -14   0    0.27    0.27 
   9  14   0    0.05    0.31 
   9 -14   0   -0.05    0.23 
  -9 -14   0   -0.36    0.27 
   9  14  -1    0.41    0.35 
   9 -14   1    0.32    0.30 
  -9 -14  -1    0.13    0.39 
   9  14   1    0.17    0.31 
   9 -14  -1    0.42    0.31 
  -9 -14   1   -0.10    0.36 
   9 -14   2   -0.74    0.25 
   9  14  -2    0.06    0.26 
   9 -14  -2   -0.17    0.21 
   9  14   2   -0.67    0.45 
   9 -14   3    4.19    0.71 
   9  14  -3    4.43    0.67 
   9 -14  -3    4.00    0.65 
   9  14   3    3.40    0.67 
   9  14  -4   -0.28    0.25 
   9 -14   4    0.09    0.30 
   9 -14  -4   -0.24    0.26 
   9  14   4   -0.19    0.26 
   9 -14   5    2.81    0.65 
   9  14  -5    4.16    0.68 
   9  14   5    4.93    0.86 
   9 -14  -5    4.37    0.73 
  10 -14   0    0.86    0.37 
 -10 -14   0    0.46    0.47 
  10  14   0    1.07    0.50 
  10 -14   1    1.59    0.39 
 -10 -14  -1    1.07    0.51 
  10  14  -1    2.35    0.60 
  10 -14  -1    1.09    0.35 
  10  14   1    1.48    0.53 
  10  14  -2    0.06    0.24 
 -10 -14  -2    0.19    0.38 
  10 -14   2    0.19    0.26 
  10  14   2   -1.31    0.41 
  10 -14  -2    0.04    0.21 
  10 -14   3    1.26    0.45 
  10  14  -3    1.19    0.41 
  10 -14  -3    0.87    0.37 
  10  14   3    1.17    0.44 
  10 -14   4    0.12    0.33 
  10  14  -4    0.40    0.33 
  10  14   4    0.14    0.35 
  10 -14  -4    0.41    0.33 
  10 -14   5   -0.13    0.39 
  10  14  -5    0.33    0.30 
  10  14   5   -0.01    0.27 
  10 -14  -5   -0.01    0.33 
  11  14   0    0.07    0.29 
  11 -14   0   -0.17    0.23 
 -11 -14  -1    0.27    0.34 
  11  14  -1   -0.22    0.22 
  11 -14  -1    0.42    0.31 
  11  14   1    0.09    0.36 
  11  14  -2   -0.01    0.23 
  11 -14   2    0.31    0.28 
 -11 -14  -2   -0.60    0.33 
  11 -14  -2    0.10    0.29 
  11  14   2    0.58    0.52 
  11  14  -3    0.25    0.37 
  11 -14   3    1.19    0.46 
  11 -14  -3    0.13    0.28 
  11  14   3    0.18    0.38 
  11 -14   4    1.03    0.46 
  11  14  -4    0.95    0.41 
  11 -14  -4    1.55    0.47 
  11  14   4    0.79    0.51 
  12  14   0    3.59    0.68 
  12  14  -1    3.95    0.62 
 -12 -14  -1    4.90    0.79 
  12  14   1    3.00    0.82 
  12 -14  -1    4.29    0.61 
  12  14  -2    0.43    0.31 
  12 -14   2   -0.02    0.29 
 -12 -14  -2    0.17    0.36 
  12 -14  -2    1.33    0.41 
  12  14   2    1.10    0.72 
  12  14  -3    3.53    0.64 
  12 -14   3    2.90    0.63 
  12 -14  -3    3.06    0.59 
  13  14   0   -0.03    0.34 
  13  14  -1    0.34    0.39 
  13  14   1    0.07    0.38 
  13 -14  -1    0.93    0.41 
 -13 -14  -2    0.44    0.39 
  13  14  -2    0.11    0.30 
  13 -14  -2   -0.61    0.26 
  14  14   0   -0.38    0.35 
   0 -15   0    0.17    0.36 
   0  15   0    1.19    0.50 
   0 -15   1  116.27    4.31 
   0  15   1  125.57    3.83 
   0 -15  -1  121.46    4.03 
   0  15  -1  122.92    3.29 
   0  15   2   -0.22    0.44 
   0 -15   2    0.61    0.61 
   0  15  -2   -0.49    0.34 
   0 -15  -2    0.07    0.54 
   0 -15   3   55.85    2.75 
   0  15  -3   57.11    2.07 
   0  15   3   50.75    2.46 
   0 -15  -3   57.97    2.42 
   0  15   4   -0.28    0.38 
   0 -15  -4    0.61    0.56 
   0 -15   4    0.30    0.41 
   0 -15  -5   18.94    1.31 
   0 -15   5   17.79    1.35 
   0  15   5   19.12    1.38 
   0 -15   6   -0.12    0.38 
   0  15   6   -0.18    0.29 
   0 -15  -6    0.10    0.44 
   0 -15   7    1.39    0.64 
  -1 -15   0   -0.24    0.29 
   1 -15   0    0.27    0.40 
  -1  15   0   -0.06    0.35 
   1  15   0   -0.12    0.31 
  -1  15   1    1.44    0.63 
  -1 -15  -1    2.10    0.78 
   1  15  -1    2.95    0.79 
   1 -15   1    2.31    0.83 
  -1  15  -1    1.35    0.47 
  -1 -15   1    2.55    0.78 
   1 -15  -1    2.33    0.77 
   1  15   1    1.77    0.66 
   1 -15   2   -0.16    0.38 
  -1  15   2    0.30    0.36 
   1  15  -2    0.09    0.34 
  -1 -15  -2    0.18    0.45 
   1 -15  -2   -0.09    0.49 
   1  15   2   -0.01    0.39 
  -1  15  -2    0.71    0.38 
  -1 -15   2    0.11    0.49 
  -1 -15  -3   16.53    1.34 
   1  15  -3   18.41    1.10 
   1 -15   3   20.82    1.73 
  -1  15   3   16.70    1.36 
   1 -15  -3   18.13    1.39 
   1  15   3   16.28    1.47 
  -1 -15   3   16.08    1.64 
  -1  15  -3   15.36    1.11 
  -1 -15  -4    0.78    0.47 
   1  15  -4    0.29    0.32 
  -1  15   4    0.13    0.34 
   1 -15   4    0.33    0.40 
   1 -15  -4    0.78    0.53 
  -1 -15   4    0.02    0.39 
   1  15   4    0.16    0.39 
  -1  15   5   13.45    1.15 
   1 -15   5   12.05    1.21 
  -1 -15  -5   13.36    1.07 
  -1 -15   5   12.90    1.07 
   1 -15  -5   14.58    1.12 
   1  15   5   14.03    1.34 
   1 -15   6    0.05    0.34 
  -1  15   6    0.27    0.37 
  -1 -15   6    0.02    0.32 
   1  15   6   -0.22    0.45 
   1 -15   7   13.52    1.36 
   2 -15   0    0.12    0.43 
   2  15   0    1.60    0.64 
  -2  15   0    0.25    0.40 
  -2 -15   0    0.22    0.44 
  -2 -15  -1   -0.11    0.49 
   2 -15   1    0.29    0.46 
   2  15  -1    0.45    0.45 
  -2  15   1    0.18    0.40 
  -2 -15   1    0.03    0.51 
   2  15   1   -0.09    0.33 
  -2  15  -1   -0.14    0.27 
   2 -15  -1    0.29    0.39 
  -2 -15  -2    0.02    0.45 
   2 -15   2    1.00    0.48 
   2  15  -2    1.24    0.45 
  -2  15   2    0.33    0.36 
   2  15   2    1.02    0.57 
   2 -15  -2    1.27    0.70 
  -2  15  -2    0.55    0.34 
  -2 -15   2    0.73    0.68 
   2 -15   3    0.78    0.50 
   2  15  -3    1.27    0.46 
  -2  15   3    0.43    0.42 
  -2 -15  -3    0.39    0.50 
  -2 -15   3   -0.06    0.41 
   2  15   3   -0.45    0.42 
   2 -15  -3    0.07    0.51 
  -2  15  -3    0.56    0.32 
   2  15  -4    2.27    0.48 
   2 -15   4    1.63    0.55 
  -2  15   4    1.54    0.52 
  -2 -15   4    1.78    0.74 
   2 -15  -4    1.08    0.50 
   2 -15   5    0.43    0.41 
  -2  15   5    0.23    0.38 
   2 -15  -5    0.10    0.42 
  -2 -15   5    0.11    0.33 
   2  15   5   -0.34    0.32 
   2 -15   6    3.01    0.76 
  -2 -15   6    4.84    1.54 
   3 -15   0    0.03    0.43 
  -3  15   0    0.10    0.31 
  -3 -15   0    0.18    0.58 
   3  15   0    0.00    0.43 
  -3  15   1    0.39    0.34 
   3  15  -1   -0.14    0.33 
  -3 -15  -1   -0.18    0.36 
   3 -15   1    0.07    0.36 
  -3 -15   1    0.23    0.36 
   3  15   1    0.18    0.51 
  -3  15  -1    1.02    0.78 
   3 -15  -1    0.07    0.24 
   3 -15   2    2.12    0.64 
  -3 -15  -2    0.81    0.56 
   3  15  -2    1.72    0.48 
  -3  15   2    1.42    0.46 
  -3  15  -2    1.88    0.50 
   3 -15  -2    2.41    0.69 
   3  15   2    2.41    0.76 
  -3 -15   2    2.86    1.07 
  -3 -15  -3   12.70    1.29 
   3 -15   3   12.34    1.16 
  -3  15   3   11.87    1.10 
   3  15  -3   11.99    0.95 
   3 -15  -3   10.56    1.46 
  -3 -15   3   10.24    1.55 
   3  15   3    9.84    1.39 
  -3  15   4    2.61    0.61 
   3 -15   4    2.93    0.72 
   3  15  -4    2.86    0.56 
  -3 -15   4    4.48    1.02 
   3  15   4    4.57    0.89 
   3 -15  -4    4.04    0.82 
   3  15  -5   12.50    0.92 
   3 -15   5   12.87    1.27 
  -3  15   5   12.57    1.08 
   3  15   5   13.82    1.18 
  -3 -15   5   11.09    1.64 
   3  15   5   12.94    1.03 
   3 -15   6    1.34    0.59 
   3  15   6    0.69    0.40 
   3 -15  -6    1.09    0.53 
   4  15   0   14.45    1.31 
  -4  15   0   15.51    1.13 
  -4 -15   0   12.47    1.60 
   4 -15   0   14.36    1.30 
   4  15  -1   86.10    2.63 
  -4  15   1   85.67    2.54 
   4 -15   1   84.83    2.87 
  -4 -15  -1   84.29    3.02 
   4 -15  -1   83.83    2.86 
   4  15   1   90.48    3.32 
  -4 -15   1   88.04    2.83 
  -4  15  -1   86.31    2.21 
   4 -15   2   21.21    1.61 
   4  15  -2   22.55    1.31 
  -4  15   2   22.44    1.47 
  -4 -15  -2   25.05    1.60 
   4  15   2   22.87    1.72 
  -4  15  -2   23.65    1.10 
   4 -15  -2   21.95    1.24 
  -4 -15   2   24.17    2.12 
  -4  15   3   43.24    1.84 
   4  15  -3   42.79    1.52 
   4 -15   3   45.45    2.15 
   4 -15  -3   46.03    1.73 
   4  15   3   47.50    2.34 
  -4 -15   3   39.94    2.24 
   4 -15   4    7.20    1.13 
   4  15  -4    5.63    0.69 
  -4  15   4    5.13    0.80 
  -4 -15   4   10.40    1.15 
   4  15   4    9.78    1.49 
   4  15   4    6.68    0.88 
   4  15  -5   10.77    0.86 
   4 -15   5   12.29    1.21 
  -4  15   5   11.24    1.04 
   4  15   5   12.40    1.14 
   4  15   5   11.97    1.39 
   4 -15   6    6.99    1.07 
   4 -15  -6    5.99    0.94 
   4  15   6    4.83    0.84 
   5  15   0    0.16    0.37 
   5 -15   0    0.39    0.41 
  -5  15   0   -0.31    0.24 
  -5 -15   0   -0.51    0.42 
  -5  15   1    0.68    0.38 
  -5 -15  -1    0.61    0.57 
   5  15  -1    0.44    0.37 
   5 -15   1    1.03    0.48 
  -5 -15   1    1.07    0.52 
  -5  15  -1    0.84    0.32 
   5 -15  -1    0.93    0.51 
   5  15   1    0.91    0.59 
   5 -15   2    0.16    0.35 
  -5 -15  -2   -0.25    0.33 
  -5  15   2    0.48    0.36 
   5  15  -2    0.17    0.31 
  -5 -15   2    0.05    0.45 
   5 -15  -2   -0.26    0.24 
   5  15   2    0.23    0.33 
  -5  15  -2    0.02    0.25 
   5  15  -3   10.17    0.90 
   5 -15   3    7.97    1.05 
  -5  15   3    8.96    0.98 
   5 -15  -3    9.22    0.89 
   5  15   3    8.68    1.17 
  -5 -15   3    8.84    1.44 
   5  15  -4   -0.30    0.32 
   5 -15   4    0.27    0.33 
  -5  15   4    0.17    0.32 
  -5 -15   4   -0.39    0.40 
   5  15   4    0.06    0.60 
   5  15   4    0.18    0.31 
   5  15  -5   17.61    1.08 
   5 -15   5   16.73    1.40 
   5 -15  -5   17.76    1.31 
   5  15   5   19.44    1.32 
   5 -15   6    0.75    0.50 
   5  15   6    0.64    0.48 
   5 -15  -6    0.96    0.48 
   6 -15   0    0.67    0.42 
  -6 -15   0    0.16    0.50 
   6  15   0   -0.25    0.27 
  -6  15   0    0.23    0.26 
   6  15  -1    1.73    0.57 
  -6 -15  -1    1.79    0.68 
   6 -15   1    1.35    0.49 
  -6  15   1    0.78    0.38 
  -6 -15   1    0.41    0.33 
  -6  15  -1    0.46    0.24 
   6 -15  -1    0.63    0.35 
   6  15   1    1.28    0.62 
   6 -15   2    0.06    0.27 
   6  15  -2    0.66    0.40 
  -6  15   2    0.00    0.28 
  -6 -15  -2    0.04    0.39 
   6  15   2    0.30    0.43 
   6 -15  -2    0.53    0.34 
  -6 -15   2    0.54    0.43 
  -6  15   3   -0.16    0.21 
   6 -15   3    0.03    0.21 
   6  15  -3   -0.23    0.21 
   6  15   3    0.29    0.59 
   6  15   3    0.10    0.32 
  -6 -15   3   -1.05    0.40 
   6 -15   4    1.46    0.55 
   6  15  -4    0.62    0.36 
   6  15   4    1.43    0.73 
   6  15   4    0.73    0.46 
   6  15  -5   -0.15    0.30 
   6 -15   5    0.26    0.35 
   6 -15  -5    0.44    0.41 
   6 -15   6    2.40    0.67 
   6  15   6    1.76    0.60 
   6 -15  -6    2.33    0.59 
   7 -15   0    0.08    0.26 
  -7 -15   0    0.22    0.53 
   7  15   0   -0.07    0.22 
  -7  15   0   -0.09    0.16 
   7 -15   1    3.29    0.62 
  -7 -15  -1    3.41    0.83 
  -7  15   1    2.13    0.49 
   7  15  -1    3.09    0.69 
  -7 -15   1    3.41    0.75 
   7  15   1    2.97    0.66 
  -7  15  -1    2.71    0.46 
   7 -15  -1    2.82    0.54 
   7 -15   2    1.72    0.54 
   7  15  -2    2.41    0.56 
  -7 -15  -2    2.73    0.62 
  -7  15   2    2.31    0.55 
  -7 -15   2    2.53    0.75 
   7  15   2    2.16    0.67 
   7 -15   3    5.45    0.82 
   7  15  -3    3.92    0.61 
   7  15   3    4.78    0.92 
   7  15   3    4.49    0.84 
   7  15  -4    3.17    0.62 
   7 -15   4    3.66    0.77 
   7  15   4    4.77    1.11 
   7 -15  -4    3.21    0.59 
   7  15   4    3.66    0.80 
   7  15  -5    7.46    0.80 
   7 -15   5    5.16    0.87 
   7 -15  -5    6.00    0.81 
   7  15   5    7.53    1.07 
   7 -15   6    4.23    0.81 
   7  15  -6    5.10    0.73 
   7 -15  -6    4.48    0.72 
   7  15   6    5.88    0.93 
   8  15   0   37.06    1.81 
   8 -15   0   34.04    1.40 
   8 -15   0   35.48    1.38 
  -8 -15   0   39.21    2.12 
   8 -15   1   40.80    1.59 
   8  15  -1   40.76    1.72 
  -8 -15  -1   43.47    1.97 
   8 -15   1   41.31    1.28 
  -8 -15   1   42.05    1.80 
   8 -15  -1   41.17    1.50 
   8  15   1   43.23    1.98 
   8 -15   2   37.15    1.65 
   8  15  -2   37.83    1.73 
  -8 -15  -2   34.62    1.87 
   8 -15  -2   37.19    1.58 
   8  15   2   37.37    2.00 
   8  15  -3   27.08    1.47 
   8 -15   3   24.48    1.46 
   8  15   3   26.23    1.62 
   8  15   3   26.36    1.72 
   8 -15  -3   25.68    1.40 
   8 -15   4   19.43    1.38 
   8  15  -4   19.79    1.18 
   8 -15  -4   19.09    1.18 
   8  15   4   21.42    1.54 
   8 -15   5    9.32    1.04 
   8  15  -5   10.48    0.97 
   8 -15  -5    9.48    0.91 
   8  15   5   10.92    1.15 
   9  15   0    0.62    0.38 
  -9 -15   0   -0.02    0.42 
   9 -15   0   -0.02    0.21 
   9 -15   0   -0.18    0.20 
   9  15  -1    2.75    0.64 
   9 -15   1    4.59    0.68 
  -9 -15  -1    3.17    0.70 
   9  15   1    3.35    0.69 
  -9 -15   1    3.97    0.69 
   9 -15  -1    3.69    0.60 
   9  15  -2    0.75    0.40 
   9 -15   2   -0.02    0.22 
  -9 -15  -2    0.47    0.36 
   9 -15  -2    0.47    0.34 
   9  15   2   -0.47    0.44 
   9  15  -3    5.32    0.82 
   9 -15   3    4.39    0.71 
   9 -15  -3    5.89    0.84 
   9  15   3    7.18    1.07 
   9 -15   4    0.73    0.42 
   9  15  -4    1.59    0.50 
   9  15   4    0.82    0.46 
   9 -15  -4    0.75    0.36 
   9 -15   5    8.07    1.11 
   9  15  -5    9.06    0.97 
   9 -15  -5    9.86    1.00 
   9  15   5    9.47    1.01 
  10  15   0    0.08    0.29 
  10 -15   0    0.46    0.27 
 -10 -15   0    0.47    0.45 
  10 -15   1    0.35    0.28 
  10  15  -1    0.16    0.35 
 -10 -15  -1   -0.12    0.32 
  10  15   1   -0.10    0.29 
  10 -15  -1   -0.25    0.28 
 -10 -15  -2    0.42    0.40 
  10 -15   2    0.20    0.28 
  10  15  -2    0.37    0.29 
  10 -15  -2   -0.04    0.24 
  10  15   2   -1.12    0.44 
  10 -15   3   -0.11    0.23 
  10  15  -3    0.03    0.30 
  10 -15  -3    0.14    0.23 
  10  15  -4   -0.26    0.24 
  10 -15   4    0.62    0.40 
  10  15   4    0.29    0.40 
  10 -15  -4    0.02    0.29 
  11 -15   0   -0.24    0.31 
  11  15   0   -0.78    0.24 
 -11 -15  -1    0.19    0.39 
  11  15  -1    0.32    0.34 
  11  15   1    0.30    0.38 
  11 -15  -1    0.60    0.32 
  11 -15   2    1.68    0.47 
 -11 -15  -2    1.07    0.61 
  11  15  -2    1.31    0.44 
  11 -15  -2    2.22    0.51 
  11  15   2    1.23    0.72 
  11 -15   3    1.68    0.46 
  11  15  -3    1.77    0.45 
  11 -15  -3    2.17    0.51 
  11 -15   4    2.88    0.64 
  11  15  -4    4.14    0.68 
  11  15   4    3.54    0.73 
  11 -15  -4    3.33    0.63 
  12  15   0   30.24    1.33 
 -12 -15  -1   16.45    1.33 
  12  15  -1   16.96    1.15 
  12 -15  -1   18.72    1.03 
  12  15   1   19.05    1.31 
 -12 -15  -2   28.03    1.56 
  12  15  -2   28.79    1.40 
  12  15   2   30.34    2.01 
  12 -15  -2   29.41    1.36 
 -12 -15  -3    7.18    0.92 
  12 -15   3   11.69    0.93 
  12  15  -3   10.49    0.93 
  12 -15  -3   11.47    0.89 
  13  15   0   -0.15    0.31 
  13  15  -1   -0.09    0.36 
  13  15   1    0.11    0.35 
  13 -15  -1    0.20    0.34 
  13  15  -2    0.38    0.35 
 -13 -15  -2    0.94    0.51 
  13 -15  -2    0.01    0.35 
   0 -16   0  708.24    8.15 
   0  16   0  708.31    7.78 
   0 -16   1   -0.16    0.42 
   0  16  -1    0.93    0.49 
   0  16   1    0.61    0.45 
   0 -16  -1   -0.51    0.34 
   0  16  -2  518.24    6.75 
   0  16   2  523.14    7.63 
   0 -16  -2  521.93    7.38 
   0 -16   2  517.08    9.09 
   0  16  -3    0.43    0.40 
   0 -16   3    0.61    0.50 
   0  16   3    0.34    0.44 
   0 -16  -3    0.50    0.52 
   0  16   4  266.18    4.96 
   0 -16  -4  266.45    4.57 
   0 -16   4  263.44    5.71 
   0 -16  -5   -0.20    0.34 
   0 -16   5   -0.49    0.29 
   0  16   5   -0.27    0.38 
   0 -16   6  107.48    3.48 
   0  16   6  107.64    3.04 
   0 -16  -6  108.37    3.01 
   1 -16   0    0.39    0.40 
   1  16   0   -0.03    0.30 
  -1  16   0    0.04    0.32 
  -1 -16   0   -0.09    0.29 
   1  16  -1    0.26    0.45 
   1 -16   1   -0.39    0.45 
  -1 -16  -1    0.13    0.62 
  -1  16   1   -0.06    0.38 
  -1 -16   1    0.08    0.45 
   1  16   1    0.02    0.32 
   1 -16  -1   -0.44    0.27 
  -1  16  -1    0.44    0.38 
  -1 -16  -2   14.82    1.49 
  -1  16   2   17.09    1.54 
   1  16  -2   17.58    1.34 
   1 -16   2   18.08    1.73 
   1 -16  -2   17.86    1.70 
  -1 -16   2   15.81    2.15 
   1  16   2   16.34    1.48 
  -1  16  -2   17.86    1.20 
   1 -16   3   13.37    1.48 
  -1  16   3   11.25    1.15 
   1  16  -3   11.79    1.05 
  -1 -16  -3   13.57    1.36 
   1 -16  -3   12.11    1.60 
  -1 -16   3   11.46    1.59 
   1  16   3   13.20    1.39 
  -1  16  -3   12.47    1.15 
   1 -16   4   53.08    2.55 
  -1 -16  -4   53.42    2.19 
  -1  16   4   56.60    2.37 
   1  16  -4   53.52    1.77 
  -1 -16   4   54.78    2.58 
   1 -16  -4   52.82    2.21 
   1  16   4   48.64    2.30 
   1 -16   5   11.98    1.23 
  -1 -16  -5   12.13    1.19 
  -1  16   5   14.01    1.23 
   1 -16  -5   11.87    1.04 
  -1 -16   5    8.83    1.39 
   1  16   5   10.19    1.04 
   1 -16   6   43.93    2.16 
  -1  16   6   45.43    1.97 
  -1 -16  -6   48.14    2.06 
   1  16   6   47.24    2.20 
  -1 -16   6   55.32    2.51 
  -2  16   0    0.69    0.49 
  -2 -16   0    0.43    0.50 
   2  16   0    0.81    0.54 
   2 -16   0    0.91    0.53 
  -2 -16  -1    6.56    1.20 
   2  16  -1    6.53    1.01 
  -2  16   1    7.15    1.07 
   2 -16   1    5.86    1.09 
   2  16   1    5.82    0.99 
  -2 -16   1    8.12    1.21 
   2 -16  -1    6.08    0.92 
  -2  16  -1    7.08    0.95 
  -2  16   2    0.49    0.41 
   2 -16   2    0.83    0.61 
   2  16  -2    0.16    0.33 
  -2 -16  -2    1.50    0.63 
   2  16   2    0.05    0.43 
  -2  16  -2    0.86    0.39 
  -2 -16   2   -0.20    0.52 
   2 -16  -2    0.43    0.43 
  -2 -16  -3    1.14    0.47 
   2 -16   3    1.50    0.66 
   2  16  -3    0.79    0.40 
  -2  16   3    0.91    0.55 
  -2  16  -3    0.95    0.36 
   2  16   3    0.81    0.62 
   2 -16  -3    0.74    0.58 
  -2 -16   3    1.33    0.77 
   2  16  -4    0.79    0.32 
  -2  16   4    0.68    0.45 
   2 -16   4    1.34    0.58 
  -2 -16  -4    1.47    0.55 
   2 -16  -4    2.99    0.90 
  -2 -16   4    1.27    0.71 
   2  16   4    0.88    0.59 
  -2  16   5    1.32    0.56 
  -2 -16  -5    2.79    0.67 
   2 -16   5    3.22    0.81 
   2  16   5    1.71    0.79 
   2 -16  -5    1.47    0.55 
  -2 -16   5    2.62    0.82 
   2 -16   6    0.61    0.43 
  -2  16   6    0.59    0.43 
  -2 -16   6    0.35    0.64 
   3 -16   0   -0.13    0.43 
  -3  16   0    0.27    0.38 
  -3 -16   0    0.49    0.51 
   3  16   0   -0.17    0.31 
  -3 -16  -1    6.84    1.17 
  -3  16   1    3.82    0.75 
   3  16  -1    4.55    0.82 
   3 -16   1    4.14    0.89 
  -3 -16   1    4.12    0.75 
  -3  16  -1    8.02    1.43 
   3  16   1    3.40    0.82 
   3 -16  -1    3.68    0.73 
  -3 -16  -2   34.91    1.89 
   3 -16   2   33.45    2.02 
   3  16  -2   33.49    1.53 
  -3  16   2   34.86    1.83 
  -3  16  -2   31.89    1.48 
  -3 -16   2   29.26    2.40 
   3  16   2   32.75    1.84 
   3 -16  -2   33.08    1.56 
   3  16  -3    9.17    0.88 
   3 -16   3   10.07    1.11 
  -3 -16  -3    8.12    1.10 
  -3  16   3    9.52    0.93 
  -3 -16   3    9.73    1.45 
   3  16   3   10.84    1.46 
   3 -16  -3    9.40    1.26 
  -3  16   4   46.17    2.07 
   3  16  -4   49.64    1.78 
   3 -16   4   49.07    2.35 
  -3 -16  -4   49.71    2.21 
   3 -16  -4   48.25    2.39 
  -3 -16   4   51.82    2.51 
   3  16   4   54.89    2.68 
  -3  16   5   11.78    1.07 
   3 -16   5   10.15    1.31 
   3  16   5    9.80    1.22 
  -3 -16   5   12.34    1.18 
   3 -16   6   48.71    2.43 
  -4  16   0  524.68    5.86 
  -4 -16   0  518.74    8.06 
   4  16   0  510.81    7.06 
   4 -16   0  515.00    7.53 
   4  16  -1    0.30    0.35 
  -4  16   1   -0.06    0.26 
   4 -16   1    0.15    0.42 
  -4 -16  -1    0.39    0.53 
   4 -16  -1    0.52    0.44 
  -4  16  -1    0.53    0.30 
   4  16   1    0.38    0.51 
  -4 -16   1    0.57    0.44 
   4  16  -2  406.30    5.52 
   4 -16   2  408.26    6.53 
  -4 -16   2  407.86    7.59 
   4 -16  -2  412.55    5.23 
  -4  16  -2  411.01    4.48 
   4  16   2  403.96    6.71 
  -4 -16  -3    0.11    0.40 
  -4  16   3    0.16    0.32 
   4  16  -3   -0.06    0.26 
   4 -16   3    0.28    0.36 
   4  16   3    0.23    0.46 
  -4 -16   3   -0.42    0.43 
   4 -16  -3    0.18    0.34 
   4  16  -4  264.32    4.15 
   4 -16   4  262.85    5.51 
  -4  16   4  265.79    4.76 
  -4 -16   4  262.82    5.55 
   4  16   4  262.37    5.96 
  -4  16   5    0.08    0.31 
   4 -16   5   -0.30    0.29 
   4  16  -5    0.35    0.31 
   4  16   5   -0.38    0.40 
   4  16   5   -0.10    0.32 
   4 -16   6   88.78    3.19 
   4 -16  -6   84.13    2.65 
   4  16   6   85.16    2.88 
   5  16   0   -0.44    0.28 
  -5  16   0   -0.05    0.24 
   5 -16   0    0.06    0.40 
  -5 -16   0    0.52    0.66 
   5  16  -1    1.55    0.49 
   5 -16   1    1.52    0.59 
  -5 -16  -1    0.97    0.63 
  -5  16   1    1.21    0.50 
  -5 -16   1    1.12    0.47 
   5 -16  -1    1.36    0.56 
  -5  16  -1    0.80    0.35 
   5  16   1    1.46    0.69 
  -5 -16  -2   12.79    1.18 
   5  16  -2   11.87    1.05 
   5 -16   2   12.74    1.20 
  -5  16   2   13.90    1.14 
  -5 -16   2   13.28    1.43 
   5  16   2   13.21    1.27 
  -5  16  -2   12.75    0.77 
   5 -16  -2   13.70    1.13 
  -5  16   3    4.84    0.82 
  -5 -16  -3    3.76    0.77 
   5 -16   3    4.80    0.91 
   5  16  -3    3.14    0.53 
  -5 -16   3    7.87    1.64 
   5 -16  -3    9.92    1.51 
   5  16   3    3.06    1.00 
  -5  16   4   22.83    1.40 
   5  16  -4   23.13    1.23 
   5 -16   4   26.24    1.68 
  -5 -16   4   28.70    1.93 
   5  16   4   24.69    1.98 
   5  16  -5    6.33    0.67 
   5 -16   5    6.55    1.06 
   5  16   5    5.45    0.84 
   5 -16   6   30.34    1.98 
   5  16   6   32.31    1.62 
   5 -16  -6   30.30    1.68 
  -6  16   0    7.84    0.74 
  -6 -16   0    3.86    0.88 
   6 -16   0    8.23    0.92 
   6  16   0    6.18    0.90 
   6 -16   1    1.30    0.55 
  -6  16   1    1.61    0.53 
   6  16  -1    2.40    0.55 
  -6 -16  -1    1.32    0.59 
   6  16   1    3.32    0.78 
  -6 -16   1    1.62    0.52 
  -6  16  -1    2.20    0.43 
   6 -16  -1    2.34    0.60 
  -6  16   2    3.59    0.65 
   6 -16   2    4.12    0.77 
  -6 -16  -2    4.15    0.80 
   6  16  -2    4.34    0.73 
   6 -16  -2    4.88    0.77 
   6  16   2    5.39    0.95 
  -6 -16   2    5.22    1.00 
   6  16  -3    0.16    0.32 
   6 -16   3    0.32    0.35 
  -6  16   3    0.53    0.38 
   6  16   3    0.97    0.52 
  -6 -16   3    1.72    0.81 
   6  16  -4    2.95    0.60 
   6 -16   4    3.32    0.78 
   6  16   4    3.69    0.76 
   6  16   4    3.66    0.90 
   6 -16   5    1.12    0.51 
   6  16  -5    1.99    0.53 
   6 -16  -5    2.07    0.54 
   6  16   5   -0.16    0.53 
   6 -16   6    2.11    0.68 
   6  16   6    1.83    0.67 
   6 -16  -6    2.04    0.63 
  -7  16   0    0.26    0.23 
   7  16   0   -0.15    0.28 
  -7 -16   0    0.13    0.44 
   7 -16   0    0.16    0.37 
  -7 -16  -1    0.97    0.53 
   7 -16   1    0.73    0.44 
  -7  16   1    1.81    0.50 
   7  16  -1    1.47    0.51 
   7 -16  -1    1.62    0.47 
  -7 -16   1    1.16    0.43 
   7  16   1    1.71    0.60 
  -7  16  -1    0.75    0.29 
   7  16  -2   12.59    1.03 
  -7 -16  -2   11.51    1.12 
   7 -16   2   11.76    1.04 
  -7  16   2   11.75    1.08 
   7  16   2   11.64    1.27 
  -7 -16   2   11.21    1.17 
   7  16  -3    5.14    0.78 
   7 -16   3    6.83    0.93 
   7  16   3    6.71    1.02 
   7  16  -4   35.49    1.51 
   7 -16   4   35.57    1.89 
   7  16   4   34.92    2.10 
   7  16   4   36.45    1.97 
   7 -16  -4   34.71    1.61 
   7  16  -5    8.23    0.83 
   7 -16   5    9.72    1.09 
   7 -16  -5    9.17    0.98 
   7  16   5    7.08    1.04 
   8  16   0  298.65    5.09 
  -8 -16   0  309.74    5.74 
   8 -16   0  304.52    4.38 
  -8 -16  -1   -0.07    0.38 
   8 -16   1   -0.18    0.24 
   8  16  -1    0.60    0.44 
   8 -16   1    0.19    0.26 
   8  16   1    0.75    0.47 
  -8 -16   1    0.40    0.36 
   8  16  -2  235.96    4.02 
   8 -16   2  232.54    4.03 
  -8 -16  -2  233.82    4.39 
   8 -16  -2  234.46    3.81 
   8  16   2  229.80    4.82 
  -8 -16   2  226.86    7.02 
   8 -16   3    0.31    0.31 
   8  16  -3    0.00    0.31 
   8 -16  -3    0.11    0.29 
   8  16   3    0.65    0.46 
   8  16  -4  114.76    2.82 
   8 -16   4  115.85    3.14 
   8  16   4  115.76    3.23 
   8 -16  -4  117.24    2.90 
   8  16  -5   -0.05    0.25 
   8 -16   5   -0.11    0.33 
   8 -16  -5   -0.12    0.31 
   8  16   5    0.04    0.37 
   9  16   0   -0.21    0.21 
   9 -16   0    0.09    0.28 
   9 -16   0    0.07    0.28 
  -9 -16   0    0.06    0.42 
   9 -16   1   -0.26    0.22 
  -9 -16  -1    0.58    0.50 
   9  16  -1   -0.05    0.36 
   9  16   1   -0.30    0.28 
  -9 -16   1    0.19    0.32 
   9 -16  -1   -0.15    0.25 
  -9 -16  -2    3.63    0.70 
   9  16  -2    2.43    0.57 
   9 -16   2    3.75    0.65 
   9  16   2    2.02    0.88 
   9 -16  -2    3.64    0.64 
   9 -16   3    2.47    0.56 
   9  16  -3    3.25    0.67 
   9 -16  -3    2.18    0.50 
   9  16  -4   11.15    0.94 
   9 -16   4   10.59    1.06 
   9  16   4   10.37    1.27 
   9 -16  -4   11.39    0.98 
   9  16  -5    3.06    0.54 
   9 -16   5    2.95    0.66 
   9  16   5    2.14    0.58 
   9 -16  -5    2.83    0.58 
  10  16   0   10.13    1.03 
 -10 -16   0    7.25    0.94 
  10 -16   0    6.41    0.88 
 -10 -16  -1   -1.21    0.34 
  10 -16   1    0.37    0.32 
  10  16  -1    0.59    0.41 
  10  16   1    0.92    0.52 
  10 -16  -1    0.56    0.35 
  10  16  -2    9.03    0.92 
 -10 -16  -2    6.27    0.89 
  10 -16   2    7.11    0.76 
  10 -16  -2    8.39    0.81 
  10  16   2    8.68    1.22 
  10 -16   3    0.12    0.31 
 -10 -16  -3    0.22    0.40 
  10  16  -3    0.12    0.33 
  10 -16  -3    0.25    0.31 
  10  16  -4    3.77    0.67 
  10 -16   4    3.76    0.71 
  10 -16  -4    4.27    0.70 
  11  16   0    0.48    0.45 
  11  16  -1    0.50    0.42 
 -11 -16  -1    2.18    0.55 
  11  16   1    0.11    0.47 
  11 -16  -1   -0.20    0.25 
  11  16  -2    7.64    0.85 
  11 -16   2    7.50    0.80 
 -11 -16  -2    8.20    0.85 
  11 -16  -2    8.82    0.86 
  11  16   2    8.39    1.16 
  11 -16   3    0.84    0.40 
  11  16  -3    1.96    0.57 
  11 -16  -3    1.05    0.54 
  11 -16   4   13.77    1.11 
  11  16  -4   14.81    1.07 
  11 -16  -4   13.98    1.06 
  12  16   0  105.42    2.79 
 -12 -16  -1   -0.15    0.38 
  12  16  -1    0.48    0.40 
  12 -16  -1   -0.18    0.24 
  12  16   1   -0.20    0.36 
  12  16  -2   81.16    2.27 
 -12 -16  -2   76.30    2.29 
  12  16   2   82.24    2.76 
  12 -16  -2   79.25    2.14 
  12  16  -3    0.04    0.34 
  12 -16   3    0.16    0.30 
 -12 -16  -3   -0.06    0.38 
  12 -16  -3   -0.10    0.32 
  13  16   0    0.96    0.39 
  13  16  -1    0.69    0.52 
  13  16   1    0.52    0.46 
  13 -16  -1    0.77    0.44 
 -13 -16  -2    1.88    0.55 
  13  16  -2    1.15    0.49 
  13 -16  -2    1.98    0.57 
   0 -17   1   41.78    2.32 
   0  17  -1   36.56    1.86 
   0 -17  -1   37.64    2.11 
   0  17   1   37.96    1.95 
   0  17  -2   -0.07    0.27 
   0 -17  -2   -0.06    0.74 
   0  17   2    0.03    0.46 
   0 -17   2   -0.14    0.50 
   0  17  -3   19.54    1.39 
   0  17   3   21.17    1.69 
   0 -17   3   27.34    2.26 
   0 -17  -4    0.13    0.46 
   0 -17   4    0.20    0.48 
   0  17   4   -0.47    0.28 
   0 -17   5    5.75    1.08 
   0  17   5    4.54    0.85 
   0 -17  -5    4.65    0.81 
   0  17   6    0.06    0.45 
   0 -17   6    0.21    0.41 
   0 -17  -6    0.50    0.42 
   1  17   0   -0.48    0.24 
   1 -17   0    0.00    0.38 
  -1 -17   0   -0.28    0.33 
  -1  17   0    0.29    0.41 
   1  17  -1   -0.06    0.35 
  -1 -17  -1    1.19    0.67 
   1 -17   1    0.51    0.59 
  -1  17   1    0.30    0.42 
  -1 -17   1    0.13    0.38 
   1 -17  -1    0.07    0.41 
   1  17   1    0.79    0.53 
  -1  17  -1    0.26    0.39 
   1  17  -2    1.77    0.59 
  -1 -17  -2    1.48    0.67 
  -1  17   2    1.80    0.70 
   1 -17   2    1.48    0.72 
   1 -17  -2    1.84    0.79 
  -1 -17   2    1.26    0.83 
  -1  17  -2    1.40    0.51 
   1  17   2    1.14    0.60 
  -1 -17  -3    1.62    0.61 
   1 -17   3    1.04    0.60 
   1  17  -3    0.56    0.37 
  -1  17   3    1.43    0.55 
  -1 -17   3    1.95    0.78 
   1  17   3    0.34    0.53 
  -1  17  -3    1.02    0.48 
   1 -17  -3    0.58    0.59 
  -1 -17  -4    7.03    0.92 
   1 -17   4   10.37    1.60 
  -1  17   4   10.58    1.16 
   1  17  -4   10.04    0.94 
   1 -17  -4   10.06    1.12 
   1  17   4   12.95    1.35 
  -1 -17   4   13.26    1.69 
  -1  17   5    0.45    0.36 
   1 -17   5    0.42    0.35 
  -1 -17  -5    0.38    0.48 
   1  17   5    0.71    0.51 
   1 -17  -5    0.56    0.49 
  -1 -17   5   -0.11    0.62 
  -1 -17  -6    6.50    0.91 
   1 -17   6    6.91    1.12 
  -1  17   6    7.41    1.06 
  -1 -17   6    8.01    1.19 
   1  17   6    6.70    0.97 
  -2  17   0   17.86    1.34 
   2 -17   0   17.02    1.32 
   2  17   0   20.26    1.56 
  -2 -17   0   16.92    1.44 
   2  17  -1    0.85    0.57 
  -2  17   1    1.08    0.56 
   2 -17   1    0.76    0.59 
  -2 -17  -1    0.68    0.63 
  -2 -17   1    1.75    0.55 
   2  17   1    1.23    0.59 
   2 -17  -1    1.37    0.52 
  -2  17  -1    1.72    0.59 
   2 -17   2   17.98    1.64 
   2  17  -2   19.01    1.30 
  -2 -17  -2   20.15    1.72 
  -2  17   2   18.21    1.43 
   2  17   2   18.77    1.41 
  -2  17  -2   18.65    1.14 
  -2 -17   2   19.32    1.92 
   2 -17  -2   19.13    1.37 
   2  17  -3    0.46    0.31 
   2 -17   3    1.63    0.67 
  -2 -17  -3    0.38    0.43 
  -2  17   3    0.60    0.43 
  -2 -17   3    0.58    0.63 
   2  17   3    1.05    0.65 
   2 -17  -3    0.44    0.52 
  -2  17  -3    0.03    0.28 
   2 -17   4    4.96    0.95 
   2  17  -4    3.56    0.67 
  -2 -17  -4    4.18    0.81 
  -2  17   4    1.52    0.70 
   2 -17  -4    6.98    1.25 
   2  17   4    5.10    1.06 
  -2 -17   4    4.07    1.00 
   2 -17   5    0.17    0.38 
  -2  17   5   -0.04    0.35 
  -2 -17  -5   -0.43    0.36 
  -2 -17   5    0.16    0.43 
   2  17   5   -1.50    0.55 
   2 -17  -5    0.15    0.47 
   2 -17   6    1.06    0.58 
  -2  17   6    0.53    0.36 
  -2 -17  -6    1.01    0.56 
  -2 -17   6    0.44    0.83 
   3 -17   0    0.12    0.46 
  -3  17   0    0.06    0.38 
  -3 -17   0    0.04    0.43 
   3  17   0   -0.03    0.45 
  -3 -17  -1    2.95    0.96 
  -3  17   1    1.52    0.57 
   3  17  -1    1.62    0.59 
   3 -17   1    3.16    0.98 
   3  17   1    1.75    0.56 
  -3 -17   1    1.25    0.46 
   3 -17  -1    1.05    0.50 
  -3  17  -1    2.94    0.83 
  -3 -17  -2    0.59    0.55 
   3  17  -2    1.38    0.49 
   3 -17   2    0.72    0.59 
  -3  17   2    1.10    0.46 
   3  17   2    0.93    0.47 
  -3  17  -2    1.05    0.43 
   3 -17  -2    1.30    0.51 
  -3 -17   2    1.11    0.76 
   3 -17   3    0.63    0.50 
   3  17  -3    1.62    0.47 
  -3 -17  -3    1.24    0.51 
  -3  17   3    0.71    0.45 
   3 -17  -3    0.59    0.49 
   3  17   3    1.68    0.69 
  -3 -17   3    2.01    0.87 
   3  17  -4    1.05    0.44 
  -3  17   4    0.50    0.42 
  -3 -17  -4    0.86    0.56 
   3 -17   4    1.34    0.59 
   3 -17  -4    0.44    0.54 
  -3 -17   4    0.77    0.67 
   3  17   4    1.34    0.71 
  -3 -17  -5    3.07    0.72 
   3 -17   5    4.13    0.92 
  -3  17   5    2.55    0.64 
  -3 -17   5    2.92    0.84 
   3  17   5    2.36    0.67 
  -3 -17  -6    2.05    0.75 
   3 -17   6    1.45    0.71 
   4 -17   0   19.49    1.41 
  -4  17   0   20.05    1.17 
  -4 -17   0   20.56    1.84 
   4  17   0   20.18    1.57 
  -4 -17  -1   21.63    1.75 
   4 -17   1   26.70    1.72 
  -4  17   1   26.07    1.54 
   4  17  -1   23.56    1.49 
   4  17   1   24.31    1.67 
  -4  17  -1   23.40    1.31 
   4 -17  -1   23.06    1.46 
  -4 -17   1   25.34    1.60 
   4  17  -2   17.26    1.25 
  -4  17   2   15.14    1.79 
  -4 -17  -2   20.05    1.64 
   4 -17   2   18.50    1.52 
  -4 -17   2   16.65    1.94 
   4  17   2   15.97    1.41 
   4 -17  -2   17.31    1.23 
  -4  17  -2   15.94    0.99 
  -4  17   3   17.85    1.30 
   4  17  -3   16.99    1.16 
   4 -17   3   21.94    1.72 
  -4 -17  -3   16.60    1.37 
   4 -17  -3   16.79    1.16 
  -4 -17   3   12.92    1.65 
   4  17   3   17.60    1.56 
   4  17  -4   14.21    1.07 
   4 -17   4   14.63    1.40 
  -4  17   4   12.70    1.21 
  -4 -17  -4   11.91    1.28 
  -4 -17   4   15.26    1.46 
   4  17   4   18.39    1.84 
   4  17  -5    9.31    0.88 
  -4  17   5   10.22    1.12 
   4 -17   5    8.63    1.21 
   4  17   5    7.64    1.12 
   4 -17   6    5.84    1.08 
   4 -17  -6    2.82    0.67 
   5 -17   0    0.34    0.39 
  -5  17   0   -0.10    0.21 
  -5 -17   0   -0.26    0.42 
   5  17   0    0.17    0.40 
  -5  17   1   -0.10    0.26 
   5 -17   1    0.19    0.38 
   5  17  -1   -1.22    0.31 
  -5 -17  -1    0.33    0.46 
  -5 -17   1   -0.99    0.24 
   5  17   1   -0.03    0.43 
   5 -17  -1    0.08    0.37 
  -5  17  -1   -0.10    0.22 
  -5 -17  -2    7.13    1.04 
  -5  17   2    7.24    0.96 
   5 -17   2    7.51    1.09 
   5  17  -2    9.31    1.03 
  -5  17  -2    7.47    0.81 
   5 -17  -2    7.34    0.77 
   5  17   2   10.60    1.16 
  -5 -17   2    7.88    1.11 
  -5 -17  -3    0.75    0.51 
   5 -17   3    0.03    0.35 
  -5  17   3   -0.08    0.30 
   5  17  -3    0.31    0.36 
  -5 -17   3   -0.09    0.45 
   5  17   3    0.70    0.51 
   5  17  -4   10.34    0.86 
   5 -17   4    9.53    1.07 
  -5  17   4   11.21    1.09 
   5  17   4    7.80    1.30 
  -5 -17   4   13.05    1.66 
   5  17  -5    0.14    0.31 
   5 -17   5   -0.03    0.33 
   5 -17   6   11.44    1.21 
   5 -17  -6   12.26    1.12 
  -6  17   0   19.56    1.18 
  -6 -17   0   19.72    1.64 
   6  17   0   19.63    1.48 
   6 -17   0   19.47    1.44 
   6  17  -1    5.14    0.80 
  -6  17   1    6.96    0.90 
  -6 -17  -1    4.67    0.91 
   6 -17   1    7.50    1.05 
   6  17   1    6.18    1.03 
  -6 -17   1    5.87    0.85 
  -6  17  -1    4.63    0.62 
   6 -17  -1    6.55    0.83 
   6  17  -2    9.03    1.11 
  -6 -17  -2    7.82    1.03 
   6 -17   2   10.13    1.13 
  -6  17   2    8.30    1.07 
   6 -17  -2    9.73    1.09 
  -6 -17   2    8.00    1.07 
   6  17   2    8.57    1.16 
   6  17  -3    2.47    0.54 
  -6  17   3    1.31    0.42 
  -6 -17  -3    1.68    0.55 
   6 -17   3    1.50    0.57 
  -6 -17   3    2.65    1.07 
   6  17   3    2.08    0.62 
   6 -17   4    4.03    0.83 
  -6  17   4    3.74    0.71 
   6  17  -4    4.20    0.68 
   6  17   4    5.46    1.01 
   6 -17   5    0.19    0.36 
   6  17  -5    0.26    0.33 
   6 -17  -5    0.50    0.42 
   6 -17   6   -0.32    0.47 
   6 -17  -6    0.45    0.45 
   7  17   0   -0.27    0.27 
  -7  17   0    0.37    0.30 
  -7 -17   0    0.48    0.53 
   7 -17   0   -0.29    0.26 
   7 -17   1    0.14    0.34 
   7  17  -1    0.18    0.35 
  -7 -17  -1    0.12    0.48 
  -7  17   1    0.62    0.34 
  -7 -17   1    0.41    0.38 
   7 -17  -1    0.17    0.31 
   7  17   1   -0.02    0.38 
  -7  17  -1    0.05    0.25 
   7 -17   2    0.10    0.31 
   7  17  -2    0.38    0.37 
  -7  17   2    0.24    0.28 
   7  17   2    0.21    0.36 
  -7 -17   2    0.20    0.31 
  -7 -17  -3    1.97    0.55 
   7  17  -3    1.76    0.45 
  -7  17   3    1.60    0.46 
   7 -17   3    1.43    0.50 
   7  17   3    1.38    0.67 
   7 -17   4   -0.01    0.37 
   7  17  -4    0.06    0.24 
   7  17   4   -1.16    0.45 
   7 -17  -4    0.03    0.35 
   7 -17   5    6.12    0.99 
   7  17  -5    5.30    0.70 
   7 -17  -5    5.08    0.83 
   8  17   0   44.33    1.97 
   8 -17   0   44.33    1.58 
  -8 -17   0   42.48    2.18 
   8  17  -1   17.83    1.26 
  -8 -17  -1   17.47    1.41 
   8 -17   1   20.55    1.33 
  -8 -17   1   16.46    1.13 
   8  17   1   18.13    1.41 
  -8 -17  -2   44.51    2.09 
   8 -17   2   43.53    1.85 
   8  17  -2   38.70    1.69 
   8  17   2   44.99    2.31 
  -8 -17   2   42.09    2.01 
  -8 -17  -3    7.96    1.05 
   8  17  -3    9.01    0.89 
   8 -17   3    7.51    0.98 
   8 -17  -3    7.93    0.84 
   8  17   3    7.47    1.06 
   8 -17   4   23.09    1.51 
   8  17  -4   21.53    1.33 
   8 -17  -4   22.86    1.37 
   8 -17   5    2.58    0.69 
   8  17  -5    3.85    0.69 
   8 -17  -5    2.98    0.65 
  -9 -17   0   -0.08    0.41 
   9 -17   0    0.07    0.25 
   9 -17   0   -0.27    0.27 
   9  17   0    0.01    0.27 
   9  17  -1    0.21    0.33 
  -9 -17  -1   -0.20    0.33 
   9 -17   1    0.14    0.25 
  -9 -17   1   -0.39    0.26 
   9  17   1   -0.25    0.33 
   9 -17  -1   -0.06    0.27 
   9 -17   2    2.98    0.62 
   9  17  -2    2.58    0.59 
  -9 -17  -2    3.87    0.78 
   9  17   2    2.56    0.82 
   9 -17  -2    4.14    0.63 
  -9 -17  -3    0.13    0.28 
   9 -17   3    0.77    0.37 
   9  17  -3    0.46    0.34 
   9 -17  -3    0.15    0.27 
   9  17   3   -0.06    0.37 
   9 -17   4   16.02    1.24 
   9  17  -4   13.68    1.07 
   9 -17  -4   15.96    1.12 
   9  17  -5    0.32    0.35 
   9 -17   5    0.54    0.45 
   9 -17  -5   -0.03    0.29 
  10  17   0    6.85    0.97 
  10 -17   0    6.28    0.73 
 -10 -17   0    6.54    0.99 
 -10 -17  -1    5.29    0.87 
  10 -17   1    5.30    0.77 
  10  17  -1    5.99    0.91 
  10  17   1    5.89    0.90 
  10 -17  -1    5.45    0.70 
 -10 -17  -2    3.94    0.73 
  10  17  -2    4.05    0.71 
  10 -17   2    3.99    0.71 
  10 -17  -2    4.36    0.66 
  10  17   2    1.83    0.52 
  10  17  -3    4.23    0.70 
  10 -17   3    3.56    0.69 
 -10 -17  -3    3.62    0.73 
  10 -17  -3    4.11    0.69 
  10  17   3    3.69    0.95 
  10 -17   4    2.44    0.64 
  10  17  -4    1.90    0.56 
  10 -17  -4    2.30    0.51 
  11  17   0   -0.31    0.33 
 -11 -17  -1    1.12    0.50 
  11  17  -1    0.80    0.46 
  11  17   1    0.12    0.37 
  11 -17  -1   -0.17    0.34 
 -11 -17  -2    0.07    0.40 
  11  17  -2   -0.08    0.27 
  11 -17   2    0.17    0.31 
  11  17   2    0.86    0.57 
  11 -17  -2    0.32    0.32 
  11  17  -3    3.30    0.67 
  11 -17   3    2.92    0.57 
 -11 -17  -3    3.39    0.75 
  11 -17  -3    4.06    0.66 
  12  17   0   45.20    1.96 
  12  17  -1    7.25    0.98 
 -12 -17  -1    6.59    1.03 
  12 -17  -1    5.90    0.72 
  12  17   1    6.42    0.96 
 -12 -17  -2   41.31    1.82 
  12  17  -2   41.59    1.71 
  12  17   2   39.52    2.13 
  12 -17  -2   38.27    1.59 
 -12 -17  -3    3.28    0.65 
  12  17  -3    3.47    0.64 
  12 -17   3    5.07    0.77 
  12 -17  -3    3.01    0.61 
  13  17   0    0.09    0.39 
  13  17  -1    0.68    0.44 
  13  17   1   -0.12    0.41 
   0  18   0    5.82    0.92 
   0 -18   0    6.62    0.96 
   0  18  -1   -0.20    0.29 
   0  18   1   -0.13    0.39 
   0 -18   1    0.31    0.42 
   0 -18  -1   -0.16    0.38 
   0  18   2    1.31    0.58 
   0 -18   2    0.61    0.69 
   0 -18  -2    0.94    0.79 
   0  18  -2    1.15    0.55 
   0 -18  -3    0.63    0.58 
   0 -18   3   -0.42    0.40 
   0  18   3   -0.15    0.35 
   0  18  -3    0.19    0.38 
   0 -18  -4    2.02    0.68 
   0  18   4    0.57    0.45 
   0 -18   4    1.08    0.64 
   0 -18   5   -0.13    0.36 
   0  18   5   -0.11    0.27 
   0 -18  -5    0.50    0.49 
   0 -18  -6    1.52    0.68 
   0  18   6    1.65    0.59 
   0 -18   6    2.73    0.81 
   1 -18   0    0.31    0.38 
  -1  18   0    0.30    0.33 
  -1 -18   0    0.06    0.37 
   1  18   0    0.03    0.33 
   1  18  -1    0.32    0.39 
  -1  18   1   -0.16    0.29 
  -1 -18  -1    0.41    0.54 
   1 -18   1   -0.05    0.39 
  -1  18  -1   -0.09    0.31 
  -1 -18   1    0.28    0.41 
   1 -18  -1    0.05    0.33 
   1  18   1    0.30    0.39 
   1 -18   2    0.20    0.51 
   1  18  -2    1.47    0.55 
  -1 -18  -2    0.69    0.67 
  -1  18   2    0.24    0.47 
   1 -18  -2    0.01    0.44 
  -1 -18   2    0.17    0.55 
   1  18   2    0.17    0.39 
  -1  18  -2    0.67    0.42 
   1  18  -3    0.17    0.34 
  -1  18   3   -0.01    0.33 
   1 -18   3    0.51    0.65 
  -1 -18  -3    0.37    0.45 
   1  18   3   -0.54    0.32 
  -1 -18   3    0.54    0.54 
  -1  18  -3   -0.01    0.33 
   1 -18  -3    0.82    0.71 
  -1 -18  -4    0.84    0.55 
   1  18  -4    0.52    0.41 
   1 -18  -4    0.24    0.55 
   1  18   4   -0.35    0.34 
  -1 -18   4    1.94    0.79 
   1 -18   5    0.44    0.48 
  -1  18   5    0.18    0.39 
  -1 -18  -5    0.34    0.44 
   1 -18  -5   -0.34    0.34 
   1  18   5    0.12    0.42 
  -1 -18   5    0.68    0.56 
   1 -18   6   -0.02    0.42 
  -1  18   6    0.34    0.41 
  -1 -18  -6    0.28    0.47 
  -1 -18   6    0.12    0.41 
   1  18   6    0.06    0.51 
   2 -18   0    2.27    0.62 
   2  18   0    2.64    0.72 
  -2  18   0    2.94    0.69 
  -2 -18   0    3.39    0.76 
  -2 -18  -1    4.86    1.11 
   2 -18   1    5.08    1.14 
   2  18  -1    6.01    1.03 
  -2  18   1    5.79    1.01 
   2  18   1    5.00    0.87 
  -2  18  -1    5.21    0.79 
  -2 -18   1    5.76    0.90 
   2 -18  -1    5.72    0.81 
   2  18  -2   -0.24    0.30 
  -2 -18  -2   -0.13    0.43 
  -2  18   2   -0.05    0.33 
   2 -18   2    0.02    0.41 
   2 -18  -2    0.00    0.29 
  -2  18  -2   -0.13    0.28 
  -2 -18   2   -0.26    0.42 
   2  18   2    0.15    0.49 
  -2 -18  -3    8.57    1.20 
   2 -18   3    7.92    1.32 
  -2  18   3    6.44    0.98 
   2  18  -3    7.52    1.05 
   2  18   3    7.15    1.12 
  -2 -18   3    7.24    1.44 
  -2  18  -3    7.72    0.95 
   2 -18  -3    6.92    1.14 
   2  18  -4    0.66    0.41 
  -2 -18  -4    0.86    0.56 
  -2  18   4    0.51    0.43 
   2  18   4   -0.06    0.44 
  -2 -18   4    1.23    0.62 
   2 -18  -4    0.78    0.49 
  -2  18   5    5.20    0.88 
  -2 -18  -5    5.46    0.95 
   2 -18   5    5.33    1.03 
   2  18   5    7.19    1.13 
  -2 -18   5    4.56    0.94 
  -2  18   6    0.05    0.35 
  -2 -18  -6    0.20    0.44 
   2 -18   6   -0.94    0.36 
  -3  18   0   -0.03    0.36 
   3 -18   0    0.04    0.34 
   3  18   0    0.44    0.50 
  -3 -18   0    0.08    0.37 
  -3  18   1    0.97    0.52 
   3  18  -1    1.06    0.55 
  -3 -18  -1    1.49    0.81 
   3 -18   1    1.87    0.70 
   3  18   1    2.26    0.67 
   3 -18  -1    0.85    0.53 
  -3 -18   1    2.26    0.58 
  -3  18  -1    1.91    1.03 
  -3 -18  -2    0.45    0.45 
   3  18  -2    0.18    0.34 
  -3  18   2    0.48    0.41 
   3 -18   2    0.51    0.52 
   3 -18  -2    0.66    0.48 
   3  18   2    0.24    0.39 
  -3  18  -2    0.09    0.28 
  -3 -18   2    0.66    0.54 
   3  18  -3    0.00    0.29 
  -3 -18  -3   -0.14    0.38 
   3 -18   3    0.35    0.43 
  -3  18   3    0.21    0.36 
   3 -18  -3    0.21    0.40 
   3  18   3    0.61    0.56 
  -3 -18   3   -0.89    0.38 
   3  18  -4    0.80    0.38 
   3 -18   4    0.91    0.52 
  -3 -18  -4    0.39    0.43 
   3  18   4    1.76    0.76 
  -3 -18   4    0.38    0.69 
   3 -18  -4    0.71    0.60 
  -3 -18  -5    0.92    0.56 
   3 -18   5    0.49    0.48 
  -3  18   5    0.19    0.41 
   3  18   5    0.12    0.50 
  -3 -18   5   -0.05    0.36 
  -3 -18  -6    1.28    0.63 
   3 -18   6    0.14    0.45 
  -4 -18   0    0.01    0.39 
   4 -18   0    0.58    0.44 
  -4  18   0    0.22    0.34 
   4  18   0    0.53    0.50 
  -4  18   1    0.25    0.37 
   4  18  -1   -0.11    0.40 
  -4 -18  -1    0.18    0.51 
   4 -18   1   -0.57    0.32 
   4 -18  -1   -0.13    0.31 
   4  18   1   -0.05    0.33 
  -4  18  -1    0.07    0.28 
  -4 -18   1   -0.12    0.24 
   4 -18   2    0.34    0.47 
  -4 -18  -2    0.63    0.52 
  -4  18   2    0.39    0.44 
   4  18  -2    0.30    0.37 
  -4  18  -2    0.29    0.33 
   4 -18  -2    0.58    0.29 
  -4 -18   2    0.73    0.47 
   4  18   2    0.55    0.47 
  -4  18   3   -0.10    0.30 
  -4 -18  -3   -0.31    0.41 
   4  18  -3    0.10    0.29 
   4 -18   3   -0.05    0.33 
   4 -18  -3    0.05    0.29 
   4  18   3    0.55    0.53 
  -4 -18   3   -0.67    0.57 
  -4 -18  -4    1.90    0.66 
   4  18  -4    2.19    0.52 
   4 -18   4    2.44    0.75 
  -4  18   4    0.92    0.45 
  -4 -18   4    1.23    0.71 
   4  18   4    1.78    0.83 
  -4 -18  -5    0.07    0.42 
   4  18  -5    0.43    0.38 
  -4  18   5   -0.78    0.17 
   4  18   5    1.04    0.76 
  -4 -18  -6    2.25    0.69 
   4 -18   6    1.65    0.64 
   4 -18  -6    1.56    0.62 
   5 -18   0   -0.11    0.39 
  -5  18   0   -0.28    0.21 
   5  18   0   -0.03    0.39 
  -5 -18   0   -0.02    0.35 
   5 -18   1    0.09    0.38 
  -5 -18  -1   -0.39    0.33 
   5  18  -1   -1.31    0.31 
  -5  18   1   -0.19    0.27 
  -5 -18   1   -0.43    0.26 
   5 -18  -1    0.32    0.46 
  -5  18  -1    0.11    0.24 
   5  18   1   -0.28    0.36 
   5 -18   2   -0.16    0.30 
  -5 -18  -2   -0.04    0.36 
  -5  18   2   -0.04    0.31 
   5  18  -2   -0.37    0.23 
   5  18   2    0.14    0.36 
  -5 -18   2    0.02    0.32 
   5 -18  -2   -0.11    0.28 
   5 -18   3    0.06    0.34 
  -5  18   3    0.27    0.38 
  -5 -18  -3   -0.30    0.37 
   5  18  -3    0.10    0.32 
  -5 -18   3    0.20    0.53 
   5  18   3   -0.22    0.31 
  -5 -18  -4   -0.04    0.36 
  -5  18   4    0.16    0.31 
   5  18  -4   -0.18    0.29 
   5 -18   4    0.30    0.32 
   5  18   4   -0.43    0.48 
  -5 -18  -5    0.34    0.43 
   5 -18   5   -0.28    0.41 
   5  18  -5    0.32    0.37 
   5 -18   6    0.73    0.57 
  -5 -18  -6   -0.12    0.41 
   5 -18  -6   -0.08    0.43 
   6 -18   0    2.42    0.62 
  -6  18   0    1.71    0.47 
   6  18   0    2.93    0.73 
  -6 -18   0    2.18    0.72 
  -6 -18  -1    1.17    0.58 
  -6  18   1    2.37    0.55 
   6  18  -1    1.62    0.56 
   6 -18   1    2.27    0.64 
  -6  18  -1    2.61    0.48 
  -6 -18   1    3.04    0.65 
   6 -18  -1    2.86    0.61 
   6  18   1    2.61    0.76 
   6 -18   2    3.48    0.74 
   6  18  -2    3.03    0.66 
  -6  18   2    3.00    0.63 
  -6 -18  -2    2.35    0.64 
   6 -18  -2    2.08    0.60 
   6  18   2    2.37    0.63 
  -6 -18   2    4.08    0.83 
  -6  18   3    2.69    0.62 
   6  18  -3    2.23    0.60 
   6 -18   3    1.61    0.59 
  -6 -18  -3    2.02    0.60 
  -6 -18   3    1.32    0.87 
   6  18   3    2.00    0.69 
  -6  18   4    0.48    0.34 
   6  18  -4    0.64    0.40 
   6 -18   4    0.31    0.42 
  -6 -18  -4    1.01    0.54 
   6  18   4    3.23    0.88 
   6  18  -5    0.74    0.40 
   6 -18   5    0.82    0.48 
   6 -18  -5    2.10    0.61 
  -7  18   0    0.06    0.24 
   7  18   0    0.21    0.43 
   7 -18   0    0.05    0.29 
  -7 -18   0   -0.11    0.39 
  -7  18   1    0.12    0.30 
   7 -18   1    0.34    0.36 
  -7 -18  -1   -0.35    0.32 
   7  18  -1    0.66    0.43 
  -7 -18   1    0.16    0.31 
   7  18   1    0.89    0.45 
   7 -18  -1    0.32    0.35 
  -7  18  -1   -0.01    0.26 
   7 -18   2    1.38    0.51 
  -7 -18  -2    0.36    0.45 
   7  18  -2    0.79    0.46 
  -7  18   2    0.57    0.37 
   7  18   2    0.86    0.55 
  -7 -18   2    2.03    0.56 
  -7 -18  -3    0.00    0.32 
   7  18  -3   -0.13    0.27 
  -7  18   3    0.18    0.31 
   7 -18   3    0.43    0.38 
   7  18   3   -0.37    0.21 
   7  18  -4    1.67    0.50 
  -7 -18  -4    2.23    0.70 
   7 -18   4    1.89    0.61 
   7  18   4    1.49    0.63 
   7 -18  -4    1.81    0.50 
   7  18  -5    0.12    0.29 
   7 -18   5    0.28    0.45 
   7 -18  -5    0.31    0.42 
   8 -18   0    0.50    0.37 
  -8 -18   0    0.36    0.46 
   8  18   0    0.06    0.35 
  -8  18   0    0.50    0.32 
  -8  18   1    0.21    0.22 
   8 -18   1    0.28    0.32 
  -8 -18  -1   -0.08    0.33 
   8  18  -1    0.30    0.39 
  -8 -18   1    0.60    0.39 
   8  18   1   -0.49    0.23 
   8  18  -2   -0.02    0.41 
   8 -18   2   -0.08    0.27 
  -8 -18  -2    0.36    0.42 
   8  18   2   -0.39    0.39 
  -8 -18   2   -0.29    0.30 
   8  18  -3   -0.04    0.27 
   8 -18   3    0.31    0.38 
   8 -18  -3   -0.69    0.27 
   8  18   3    0.03    0.34 
  -8 -18  -4    0.21    0.35 
   8 -18   4    0.13    0.35 
   8  18  -4    0.02    0.29 
   8 -18  -4   -0.17    0.31 
   8 -18   5   -0.12    0.35 
   8  18  -5    0.03    0.32 
   8 -18  -5   -0.06    0.34 
   9 -18   0   -0.06    0.29 
   9 -18   0    0.09    0.30 
   9  18   0   -0.10    0.32 
   9  18  -1    0.39    0.28 
   9 -18   1    0.74    0.41 
  -9 -18  -1    0.77    0.49 
   9  18   1    0.25    0.39 
  -9 -18  -2    0.53    0.39 
   9  18  -2   -0.13    0.35 
   9 -18   2   -0.13    0.28 
   9  18   2   -0.28    0.35 
   9 -18  -2    0.14    0.27 
  -9 -18  -3    0.91    0.46 
   9 -18   3    0.25    0.36 
   9  18  -3   -0.01    0.30 
   9 -18  -3    0.47    0.36 
   9  18   3    0.30    0.46 
   9  18  -4   -0.07    0.32 
  -9 -18  -4    0.17    0.37 
   9 -18   4   -0.11    0.30 
   9 -18  -4    0.20    0.33 
 -10 -18   0    6.52    1.04 
  10 -18   0    7.23    0.72 
  10  18   0    6.51    0.92 
  10 -18   1   -0.09    0.29 
  10  18  -1    0.01    0.33 
 -10 -18  -1    0.05    0.33 
  10 -18  -1    0.27    0.27 
  10  18   1   -0.05    0.30 
 -10 -18  -2    3.21    0.70 
  10 -18   2    5.26    0.82 
  10  18  -2    3.00    0.65 
  10 -18  -2    3.60    0.61 
  10 -18   3    0.16    0.34 
 -10 -18  -3   -0.21    0.33 
  10  18  -3    0.09    0.35 
  10 -18  -3    0.20    0.28 
  10  18   3    0.37    0.46 
  10 -18   4    1.48    0.52 
  10  18  -4    0.96    0.45 
 -10 -18  -4    1.15    0.48 
  10 -18  -4    0.97    0.50 
  11  18   0   -0.27    0.30 
  11  18  -1    0.33    0.37 
 -11 -18  -1   -0.12    0.31 
  11  18   1    0.21    0.24 
  11 -18  -1    0.06    0.25 
  11 -18   2    0.49    0.33 
 -11 -18  -2    0.31    0.48 
  11  18  -2    0.45    0.43 
  11 -18  -2    0.37    0.27 
  11  18   2    0.54    0.47 
  11  18  -3   -0.06    0.29 
 -11 -18  -3    0.41    0.44 
  11 -18   3   -0.08    0.31 
  11 -18  -3    0.01    0.34 
  12  18   0    2.13    0.59 
  12  18  -1    0.19    0.36 
 -12 -18  -1    0.77    0.63 
  12 -18  -1    0.25    0.28 
  12  18   1    0.27    0.36 
 -12 -18  -2    1.23    0.54 
  12  18  -2    0.80    0.46 
  12  18   2    1.02    0.66 
  12 -18  -2    0.31    0.42 
  13  18   0    0.09    0.40 
   0  19   0    0.49    0.37 
   0 -19   0    0.21    0.32 
   0 -19  -1    0.21    0.37 
   0 -19   1    0.24    0.46 
   0  19   1    0.26    0.38 
   0  19  -1   -0.04    0.32 
   0  19  -2   -0.17    0.30 
   0 -19  -2    0.08    0.53 
   0  19   2    0.27    0.44 
   0 -19   2   -0.26    0.57 
   0 -19  -3    0.05    0.54 
   0 -19   3    0.56    0.57 
   0  19   3    0.33    0.48 
   0  19  -3    0.70    0.36 
   0 -19   4   -0.14    0.40 
   0  19   4   -0.38    0.30 
   0 -19  -4   -0.35    0.41 
   0 -19  -5    4.42    0.91 
   0  19   5    3.62    0.87 
   0 -19   5    4.18    0.98 
   0 -19  -6   -0.19    0.39 
   0 -19   6   -0.35    0.48 
   0  19   6   -0.31    0.50 
  -1  19   0   -0.06    0.30 
   1  19   0    0.47    0.41 
   1 -19   0   -0.55    0.25 
  -1 -19   0   -0.01    0.31 
  -1 -19  -1    0.41    0.49 
   1  19  -1    0.29    0.39 
  -1  19   1   -0.10    0.30 
   1 -19   1   -0.51    0.31 
   1 -19  -1    0.01    0.36 
  -1  19  -1   -0.36    0.28 
   1  19   1    0.15    0.39 
  -1 -19   1    0.16    0.30 
   1  19  -2    8.31    1.15 
  -1  19   2    8.70    1.32 
  -1 -19  -2    7.95    1.38 
   1 -19   2   10.97    1.64 
   1  19   2    8.17    1.14 
   1 -19  -2    4.61    0.98 
  -1 -19   2    9.84    1.63 
  -1  19  -2    8.45    0.89 
   1 -19   3    1.49    0.78 
  -1 -19  -3    1.63    0.62 
   1  19  -3    2.11    0.64 
  -1  19   3    1.55    0.69 
   1 -19  -3    3.05    0.94 
   1  19   3    1.28    0.67 
  -1 -19   3   -0.04    0.47 
  -1  19  -3    1.46    0.48 
   1 -19   4   16.24    1.60 
  -1 -19  -4   16.27    1.39 
   1  19  -4   17.33    1.39 
  -1  19   4   16.39    1.51 
   1  19   4   17.19    1.61 
  -1 -19   4   17.04    1.69 
   1 -19  -4   17.73    1.52 
  -1 -19  -5    1.90    0.72 
  -1  19   5    1.18    0.55 
   1 -19   5    0.76    0.60 
   1 -19  -5    0.83    0.53 
  -1 -19   5    0.70    0.60 
   1  19   5    1.03    0.56 
   1 -19   6   23.18    1.87 
  -1 -19  -6   15.03    1.27 
  -1  19   6   15.64    1.41 
  -1 -19   6   16.07    1.63 
   1  19   6   15.04    1.32 
   2 -19   0   96.97    3.18 
  -2  19   0   94.51    2.87 
   2  19   0  100.02    3.13 
  -2 -19   0   97.95    3.09 
  -2  19   1    1.50    0.67 
   2  19  -1    3.32    0.87 
   2 -19   1    0.80    0.69 
  -2 -19  -1    2.58    0.98 
  -2  19  -1    2.64    0.66 
   2 -19  -1    2.71    0.70 
   2  19   1    3.08    0.77 
  -2 -19   1    3.01    0.82 
  -2  19   2   82.30    2.93 
   2 -19   2   83.52    3.50 
  -2 -19  -2   78.94    3.24 
   2  19  -2   79.60    2.70 
  -2 -19   2   79.88    3.31 
   2 -19  -2   77.90    2.55 
  -2  19  -2   81.88    2.31 
   2  19   2   77.76    2.67 
  -2  19   3    5.02    0.93 
  -2 -19  -3    5.23    0.94 
   2  19  -3    5.95    0.84 
   2 -19   3    6.13    1.26 
   2 -19  -3    4.73    0.90 
  -2 -19   3    4.29    1.15 
   2  19   3    4.29    0.93 
  -2 -19  -4   33.92    1.83 
  -2  19   4   35.15    2.04 
   2 -19   4   31.79    2.33 
   2  19  -4   36.32    1.71 
  -2 -19   4   34.92    2.29 
   2  19   4   39.87    2.52 
   2 -19  -4   35.56    2.27 
  -2 -19  -5    1.00    0.50 
  -2  19   5    1.29    0.53 
   2 -19   5    0.46    0.41 
  -2 -19   5   -0.33    0.59 
   2  19   5    0.95    0.85 
  -2  19   6    7.45    1.00 
  -2 -19  -6    7.71    1.15 
   2 -19   6    9.57    1.46 
  -3  19   0    0.14    0.40 
   3 -19   0    0.19    0.37 
   3  19   0    0.41    0.42 
  -3 -19   0    0.14    0.36 
   3  19  -1    0.44    0.46 
  -3 -19  -1    0.43    0.62 
   3 -19   1   -0.06    0.50 
  -3  19   1    0.01    0.32 
  -3  19  -1    0.62    0.70 
  -3 -19   1    1.14    0.67 
   3  19   1    0.33    0.38 
   3 -19  -1    0.01    0.34 
   3  19  -2    6.11    0.91 
  -3 -19  -2    7.81    1.29 
  -3  19   2    5.54    0.92 
   3 -19   2    7.21    1.19 
  -3 -19   2    6.93    1.19 
   3 -19  -2    7.29    0.95 
   3  19   2    6.48    1.03 
  -3  19  -2    8.31    0.78 
  -3 -19  -3   -0.45    0.35 
  -3  19   3   -0.11    0.25 
   3 -19   3   -0.39    0.23 
   3  19  -3    0.50    0.37 
   3 -19  -3    0.19    0.33 
  -3 -19   3    0.01    0.49 
   3  19   3   -0.76    0.34 
   3  19  -4   15.23    1.08 
  -3 -19  -4   15.07    1.22 
  -3  19   4   16.40    1.36 
   3 -19   4   19.00    1.69 
  -3 -19   4   12.51    1.95 
   3 -19  -4   14.87    1.24 
   3  19   4   14.81    1.84 
  -3  19   5   -0.12    0.34 
   3 -19   5   -0.09    0.36 
  -3 -19  -5   -0.26    0.47 
  -3 -19   5    0.44    0.57 
   3  19   5   -0.06    0.55 
  -3  19   6   12.58    1.22 
   3 -19   6   13.88    1.50 
  -3 -19  -6   14.80    1.41 
   4  19   0    0.68    0.54 
   4 -19   0    0.21    0.37 
  -4  19   0   -0.01    0.29 
  -4 -19   0    1.32    0.60 
  -4  19   1    0.45    0.39 
   4  19  -1    0.07    0.24 
   4 -19   1    0.07    0.47 
  -4 -19  -1   -0.50    0.43 
  -4 -19   1   -0.02    0.25 
   4  19   1    0.32    0.46 
   4 -19  -1    0.17    0.30 
  -4  19  -1   -0.38    0.27 
  -4 -19  -2    0.01    0.44 
  -4  19   2    0.15    0.38 
   4  19  -2   -0.05    0.33 
   4 -19   2    0.19    0.37 
   4  19   2    0.09    0.33 
  -4 -19   2   -0.27    0.36 
   4 -19  -2   -0.15    0.25 
  -4  19  -2   -0.11    0.26 
  -4 -19  -3    0.10    0.48 
  -4  19   3    0.15    0.34 
   4  19  -3    0.65    0.44 
   4 -19   3    0.79    0.56 
   4 -19  -3    0.87    0.46 
  -4 -19   3   -0.39    0.56 
   4  19   3    0.16    0.42 
   4 -19   4    0.31    0.41 
  -4  19   4    0.14    0.31 
   4  19  -4   -0.07    0.30 
  -4 -19  -4   -0.03    0.38 
   4  19   4    0.73    0.54 
  -4 -19   4   -0.24    0.42 
  -4 -19  -5    1.26    0.61 
   4 -19   5    0.49    0.73 
  -4  19   5    2.23    0.56 
   4  19   5    1.32    0.61 
  -4 -19  -6    0.08    0.48 
   4 -19   6   -0.44    0.42 
   5 -19   0   -0.18    0.34 
  -5 -19   0    0.23    0.38 
  -5  19   0    0.15    0.33 
   5  19   0    0.17    0.41 
   5 -19   1    0.80    0.50 
  -5  19   1    0.93    0.55 
   5  19  -1    0.46    0.45 
  -5 -19  -1    0.08    0.46 
  -5 -19   1    1.10    0.47 
   5  19   1    0.13    0.40 
  -5  19  -1    0.30    0.33 
   5 -19  -1    0.31    0.43 
  -5  19   2    4.73    0.79 
  -5 -19  -2    4.51    0.91 
   5 -19   2    5.43    1.02 
   5  19  -2    4.34    0.75 
  -5 -19   2    6.11    0.94 
   5  19   2    5.39    0.89 
   5 -19  -2    5.11    0.73 
   5  19  -3    2.35    0.50 
  -5 -19  -3    3.45    0.84 
   5 -19   3    3.08    0.81 
  -5  19   3    1.87    0.51 
  -5 -19   3    2.53    0.95 
   5  19   3    2.38    0.71 
   5 -19   4    9.08    1.28 
  -5 -19  -4   10.56    1.17 
  -5  19   4    8.86    1.16 
   5  19  -4    8.10    0.85 
  -5 -19   4   10.62    1.62 
   5  19   4    5.86    1.15 
   5 -19   5    6.59    1.13 
  -5  19   5    4.92    0.86 
   5  19  -5    5.06    0.81 
  -5 -19  -5    3.78    0.89 
  -6 -19   0   74.30    2.88 
   6 -19   0   76.69    2.56 
   6  19   0   81.74    2.86 
  -6  19   0   73.71    2.20 
  -6 -19  -1   26.00    1.86 
   6  19  -1   26.37    1.54 
  -6  19   1   25.29    1.47 
   6 -19   1   24.13    1.56 
  -6 -19   1   26.55    1.44 
  -6  19  -1   24.94    1.26 
   6 -19  -1   28.19    1.82 
   6  19   1   27.69    1.90 
  -6  19   2   51.86    2.07 
  -6 -19  -2   53.81    2.49 
   6  19  -2   50.53    2.05 
   6 -19   2   53.58    2.35 
  -6 -19   2   49.58    2.01 
   6 -19  -2   50.37    1.93 
   6  19   2   53.50    2.33 
  -6 -19  -3   14.39    1.32 
   6  19  -3   12.53    1.08 
  -6  19   3   12.55    1.12 
   6 -19   3   11.20    1.21 
  -6 -19   3   15.14    2.47 
   6  19   3   17.06    1.41 
   6 -19   4   24.65    1.70 
   6  19  -4   22.29    1.43 
  -6 -19  -4   22.08    1.64 
  -6  19   4   22.20    1.45 
   6  19   4   22.46    1.72 
  -6 -19  -5    8.22    1.10 
   6  19  -5    9.48    0.87 
   6 -19   5   11.65    1.30 
   6 -19  -5    8.78    1.10 
  -7  19   0    0.17    0.30 
   7 -19   0   -0.13    0.28 
   7  19   0    0.15    0.35 
  -7 -19   0    0.28    0.41 
   7  19  -1    0.11    0.32 
  -7 -19  -1   -0.14    0.39 
  -7  19   1   -0.05    0.27 
   7 -19   1   -0.17    0.31 
   7 -19  -1    0.16    0.32 
  -7  19  -1   -0.14    0.26 
   7  19   1   -0.28    0.39 
  -7 -19   1   -0.07    0.27 
   7  19  -2    3.22    0.68 
  -7 -19  -2    5.23    0.93 
  -7  19   2    3.50    0.66 
   7 -19   2    2.52    0.59 
   7  19   2    2.41    0.67 
  -7 -19   2    4.55    0.74 
  -7 -19  -3   -0.17    0.32 
   7 -19   3    0.04    0.33 
  -7  19   3    0.22    0.32 
   7  19  -3    0.13    0.35 
   7  19   3    0.32    0.41 
   7 -19   4   10.77    1.16 
   7  19  -4    9.26    0.92 
  -7 -19  -4    7.69    1.09 
   7  19   4   10.52    1.31 
   7  19  -5    0.20    0.35 
   7 -19   5    0.21    0.39 
  -7 -19  -5   -0.13    0.39 
   7 -19  -5    0.70    0.48 
   8  19   0   -1.66    0.37 
   8 -19   0    0.12    0.33 
  -8  19   0    0.06    0.26 
  -8 -19   0   -0.46    0.34 
  -8 -19  -1    0.30    0.53 
   8 -19   1   -0.35    0.35 
  -8  19   1    0.01    0.26 
   8  19  -1   -0.11    0.33 
  -8 -19   1    0.24    0.36 
   8  19   1   -0.13    0.35 
  -8 -19  -2    0.01    0.45 
   8  19  -2    0.07    0.35 
   8 -19   2    0.15    0.38 
  -8 -19   2   -0.25    0.39 
   8  19   2    0.00    0.37 
   8  19  -3    0.30    0.33 
   8 -19   3   -0.19    0.29 
  -8 -19  -3   -0.13    0.25 
   8  19   3    0.17    0.40 
   8 -19  -3    0.33    0.35 
  -8 -19  -4    0.18    0.40 
   8  19  -4    0.03    0.30 
   8 -19   4    0.15    0.38 
   8 -19  -4    0.16    0.30 
   8  19  -5    0.60    0.39 
   8 -19   5    0.65    0.52 
  -8 -19  -5    0.19    0.43 
   8 -19  -5    0.80    0.46 
   9 -19   0   -0.30    0.29 
   9  19   0   -0.02    0.27 
   9 -19   0   -0.19    0.24 
  -9 -19   0   -1.01    0.38 
  -9 -19  -1    0.81    0.64 
   9  19  -1    0.43    0.36 
   9 -19   1    0.81    0.44 
  -9 -19   1    0.32    0.35 
   9 -19  -1    0.33    0.29 
   9  19   1    1.67    0.64 
   9  19  -2    0.98    0.47 
   9 -19   2    1.31    0.49 
  -9 -19  -2    1.00    0.52 
   9 -19  -2    1.15    0.38 
   9  19   2    1.20    0.53 
   9  19  -3    4.73    0.82 
   9 -19   3    4.22    0.75 
  -9 -19  -3    4.26    0.80 
   9  19   3    5.04    0.84 
   9 -19  -3    5.17    0.74 
   9 -19   4    5.62    0.98 
  -9 -19  -4    3.58    0.73 
   9  19  -4    5.40    0.82 
   9 -19  -4    5.50    0.84 
 -10 -19   0   33.55    1.76 
  10 -19   0   34.03    1.35 
  10  19   0   32.72    1.67 
  10  19  -1   27.56    1.56 
  10 -19   1   29.82    1.44 
  10  19   1   28.91    1.75 
  10 -19  -1   28.80    1.32 
 -10 -19  -2   25.89    1.55 
  10  19  -2   26.38    1.56 
  10 -19   2   26.33    1.38 
  10  19   2   27.34    1.59 
  10 -19  -2   26.68    1.28 
  10 -19   3   24.30    1.44 
 -10 -19  -3   24.43    1.57 
  10  19  -3   24.46    1.34 
  10  19   3   26.04    1.60 
  10 -19  -3   25.50    1.36 
 -10 -19  -4   10.99    1.05 
  10  19  -4   11.03    1.02 
  10 -19   4    9.98    0.96 
  10 -19  -4    9.99    0.91 
  11  19   0   -0.52    0.27 
  11  19  -1    0.31    0.34 
 -11 -19  -1    0.28    0.35 
  11 -19  -1    0.19    0.33 
  11  19   1    0.14    0.40 
 -11 -19  -2    2.68    0.66 
  11 -19   2    2.37    0.54 
  11  19  -2    2.38    0.67 
  11  19   2    0.59    0.42 
  11 -19   3    0.49    0.40 
  11  19  -3    0.10    0.33 
 -11 -19  -3    0.22    0.40 
  11 -19  -3   -0.52    0.25 
  12  19   0    0.32    0.38 
 -12 -19  -1    0.49    0.87 
  12  19  -1    0.72    0.40 
  12 -19  -1   -0.19    0.32 
  12  19   1    0.90    0.56 
 -12 -19  -2    0.23    0.44 
  12  19  -2    0.01    0.28 
  12 -19  -2   -0.31    0.28 
  12  19   2   -0.45    0.43 
   0  20   0    1.81    0.53 
   0 -20   0    1.66    0.56 
   0 -20  -1    0.67    0.48 
   0  20   1   -0.19    0.32 
   0  20  -1    0.50    0.38 
   0 -20   1   -0.08    0.34 
   0  20   2    1.16    0.62 
   0 -20  -2    3.00    0.83 
   0  20  -2    2.17    0.54 
   0 -20   2    4.06    1.24 
   0  20  -3    0.04    0.44 
   0  20   3    0.01    0.45 
   0 -20   3   -1.50    0.59 
   0 -20  -3    0.22    0.54 
   0 -20   4    1.76    0.78 
   0  20   4    0.74    0.50 
   0 -20  -4    0.55    0.59 
   0 -20   5   -0.45    0.39 
   0  20   5    0.17    0.45 
   0 -20  -5    0.17    0.43 
   0 -20  -6    2.66    0.85 
   0 -20   6    2.42    0.82 
   0  20   6    2.62    0.78 
  -1  20   0    0.27    0.33 
   1 -20   0    0.31    0.43 
  -1 -20   0   -0.28    0.27 
   1  20   0    0.21    0.37 
  -1 -20  -1    5.98    1.04 
  -1  20   1    7.87    1.12 
   1  20  -1    5.20    0.86 
   1 -20   1    5.89    1.04 
   1 -20  -1    5.20    0.86 
  -1  20  -1    6.30    0.87 
  -1 -20   1    8.37    1.21 
   1  20   1    6.33    0.99 
  -1 -20  -2    3.07    1.08 
  -1  20   2    3.00    0.80 
   1 -20   2    3.66    0.96 
   1  20  -2    3.10    0.77 
  -1 -20   2    3.67    0.94 
   1  20   2    3.32    0.75 
   1 -20  -2    2.88    0.72 
  -1  20  -2    3.22    0.64 
  -1 -20  -3   27.56    1.90 
   1 -20   3   32.45    2.73 
  -1  20   3   24.40    1.76 
   1  20  -3   27.08    1.62 
  -1  20  -3   26.04    1.36 
  -1 -20   3   27.09    2.23 
   1  20   3   28.97    1.94 
   1 -20  -3   23.04    1.88 
  -1 -20  -4    6.74    1.11 
  -1  20   4    5.43    0.96 
   1 -20   4    5.12    1.23 
   1 -20  -4    6.39    1.13 
   1  20   4    6.03    1.10 
  -1 -20   4    6.87    1.30 
  -1  20   5   36.33    1.97 
   1 -20   5   39.35    2.57 
  -1 -20  -5   37.33    1.97 
   1  20   5   37.48    2.12 
   1 -20  -5   37.31    2.06 
  -1 -20   5   34.73    2.26 
  -1  20   6    8.52    1.22 
  -1 -20  -6    7.45    1.08 
   1 -20   6    7.36    1.29 
  -1 -20   6    7.90    1.40 
   1  20   6   12.39    1.36 
  -2 -20   0    1.54    0.57 
  -2  20   0    0.73    0.48 
   2  20   0    0.43    0.43 
   2 -20   0    1.92    0.63 
   2  20  -1  446.27    6.92 
  -2  20   1  449.51    6.65 
   2 -20   1  453.47    7.69 
  -2 -20  -1  452.26    7.59 
   2 -20  -1  448.90    5.95 
  -2 -20   1  451.48    6.31 
  -2  20  -1  455.92    5.78 
  -2  20   2    0.54    0.40 
   2 -20   2    0.03    0.51 
   2  20  -2    0.83    0.47 
  -2 -20  -2    0.41    0.54 
   2 -20  -2    0.14    0.39 
  -2  20  -2   -0.12    0.26 
   2  20   2   -0.04    0.40 
  -2 -20   2   -0.35    0.35 
   2 -20   3  269.36    6.21 
  -2 -20  -3  271.83    5.29 
  -2  20   3  277.10    5.29 
   2  20  -3  263.91    4.71 
   2 -20  -3  269.55    4.90 
  -2 -20   3  262.46    7.05 
   2  20  -4    0.07    0.38 
  -2 -20  -4    0.49    0.47 
  -2  20   4    0.24    0.32 
   2 -20   4    0.43    0.58 
   2  20   4   -0.55    0.37 
  -2 -20   4    0.11    0.58 
   2 -20  -4    0.04    0.52 
   2 -20   5  125.74    4.17 
  -2  20   5  127.58    3.54 
  -2 -20  -5  126.78    3.40 
   2  20   5  134.58    3.91 
  -2 -20   5  121.96    4.22 
  -2  20   6   -0.46    0.40 
  -2 -20  -6    0.07    0.50 
   2 -20   6   -0.33    0.57 
   3  20   0   -1.84    0.41 
  -3 -20   0   -0.20    0.25 
   3 -20   0   -0.19    0.33 
  -3  20   0   -0.69    0.38 
  -3 -20  -1    2.21    0.76 
   3 -20   1    2.54    0.80 
  -3  20   1    3.01    0.81 
   3  20  -1    2.66    0.79 
   3 -20  -1    2.59    0.70 
   3  20   1    2.96    0.77 
  -3 -20   1    2.33    0.66 
  -3  20  -1    1.82    0.53 
  -3  20   2    1.98    0.60 
   3 -20   2    2.45    0.94 
   3  20  -2    2.99    0.73 
  -3 -20  -2    2.14    0.86 
  -3  20  -2    2.38    0.53 
   3  20   2    4.35    0.89 
  -3 -20   2    3.20    0.76 
   3 -20  -2    2.54    0.73 
  -3  20   3   22.90    1.61 
  -3 -20  -3   24.29    1.74 
   3  20  -3   21.41    1.37 
   3 -20   3   26.70    2.00 
   3  20   3   25.96    1.72 
   3 -20  -3   22.49    1.48 
  -3 -20   3   22.67    2.11 
  -3 -20  -4    6.92    1.06 
   3  20  -4    5.82    0.80 
   3 -20   4    7.55    1.24 
  -3  20   4    5.25    0.92 
   3  20   4    6.96    1.14 
  -3 -20   4    3.38    1.41 
   3 -20  -4    8.91    1.14 
   3 -20   5   29.90    2.05 
  -3 -20  -5   29.38    1.80 
  -3  20   5   27.93    1.67 
  -3 -20   5   29.55    2.08 
   3  20   5   29.48    2.01 
  -3 -20  -6    4.29    0.82 
  -3  20   6    5.54    0.92 
   3 -20   6    4.69    1.18 
   4 -20   0    2.59    0.66 
  -4 -20   0    2.86    0.77 
  -4  20   0    1.63    0.53 
   4  20   0    1.95    0.74 
   4 -20   1    3.34    0.87 
   4  20  -1    3.67    0.85 
  -4  20   1    2.91    0.67 
  -4 -20  -1    2.91    0.93 
  -4  20  -1    4.02    0.78 
   4  20   1    3.53    0.81 
   4 -20  -1    3.66    0.76 
  -4 -20   1    3.29    0.66 
   4 -20   2    0.72    0.57 
   4  20  -2    0.61    0.45 
  -4 -20  -2    0.83    0.54 
  -4  20   2    0.45    0.42 
   4 -20  -2    1.29    0.47 
  -4 -20   2    1.06    0.52 
   4  20   2    0.65    0.59 
  -4  20   3    1.23    0.52 
   4  20  -3    1.01    0.43 
   4 -20   3    1.14    0.64 
  -4 -20  -3    2.63    0.73 
   4  20   3    1.16    0.51 
  -4 -20   3    1.52    0.94 
   4 -20  -3    1.97    0.54 
   4  20  -4    0.85    0.44 
   4 -20   4    1.35    0.62 
  -4 -20  -4    1.13    0.62 
  -4  20   4    1.99    0.65 
  -4 -20   4    0.70    0.58 
   4  20   4    0.87    0.77 
   4 -20   5    0.02    0.44 
  -4  20   5    0.76    0.47 
  -4 -20  -5    0.05    0.40 
   4  20   5    0.71    0.71 
   4 -20   6    1.88    0.85 
  -4 -20  -6    4.87    1.11 
   5  20   0   -0.02    0.36 
  -5  20   0    0.11    0.34 
   5 -20   0    0.57    0.41 
  -5 -20   0    0.14    0.34 
   5  20  -1    3.62    0.72 
  -5 -20  -1    5.30    1.35 
  -5  20   1    5.13    0.91 
   5 -20   1    5.16    0.98 
   5 -20  -1    3.97    0.82 
  -5 -20   1    3.99    0.70 
  -5  20  -1    3.96    0.63 
   5  20   1    3.47    0.89 
   5 -20   2    3.25    0.85 
  -5  20   2    1.38    0.52 
   5  20  -2    1.49    0.54 
  -5 -20  -2    1.21    0.59 
   5 -20  -2    2.23    0.51 
   5  20   2   -1.04    0.52 
  -5 -20   2    1.61    0.53 
  -5  20   3   16.72    1.30 
   5 -20   3   21.22    1.62 
  -5 -20  -3   18.98    1.65 
   5  20  -3   18.62    1.31 
   5  20   3   17.36    1.39 
  -5 -20   3   18.71    1.95 
  -5  20   4    6.54    0.97 
   5 -20   4    7.96    1.31 
   5  20  -4    6.82    0.94 
  -5 -20  -4    5.65    1.01 
   5  20   4    4.98    0.94 
  -5 -20   4    5.52    1.31 
   5 -20   5   44.44    2.36 
  -5 -20  -5   44.96    2.33 
  -5  20   5   39.59    2.03 
   5  20  -5   42.06    1.82 
   5  20   5   35.92    2.91 
  -6  20   0   -0.09    0.26 
   6 -20   0   -0.30    0.31 
   6  20   0    0.33    0.42 
  -6 -20   0    0.25    0.37 
   6 -20   1  300.64    5.75 
  -6  20   1  302.82    4.82 
  -6 -20  -1  298.21    6.11 
   6 -20  -1  292.57    5.56 
  -6  20  -1  299.51    4.38 
  -6 -20   1  299.11    4.74 
   6  20   1  302.66    5.98 
  -6  20   2    0.06    0.27 
   6 -20   2    0.20    0.41 
  -6 -20  -2   -0.08    0.35 
   6  20  -2   -0.01    0.26 
   6 -20  -2    0.67    0.44 
  -6 -20   2   -0.18    0.26 
   6  20   2    0.78    0.47 
  -6 -20  -3  204.29    4.71 
   6  20  -3  204.95    4.08 
   6 -20   3  205.04    4.71 
  -6  20   3  206.23    4.35 
  -6 -20   3  222.71    6.92 
   6  20   3  206.74    4.55 
  -6  20   4    0.15    0.29 
   6  20  -4    0.08    0.37 
  -6 -20  -4    0.18    0.41 
   6 -20   4    0.09    0.47 
   6  20   4    0.43    0.48 
   6  20  -5   94.64    2.62 
   6 -20   5   94.17    3.35 
  -6 -20  -5   95.05    3.06 
  -7  20   0    0.12    0.26 
   7 -20   0   -0.04    0.32 
  -7 -20   0    0.27    0.39 
   7  20   0    0.20    0.35 
  -7 -20  -1    2.31    0.76 
   7 -20   1    2.27    0.64 
  -7  20   1    1.14    0.45 
   7  20  -1    1.38    0.51 
  -7 -20   1    2.52    0.55 
  -7  20  -1    1.65    0.40 
   7 -20  -1    1.46    0.47 
   7  20   1    0.80    0.42 
  -7  20   2    1.81    0.55 
  -7 -20  -2    3.43    0.78 
   7  20  -2    2.01    0.56 
   7 -20   2    3.64    0.82 
  -7 -20   2    2.78    0.55 
   7  20   2    1.97    0.56 
   7 -20   3   11.27    1.19 
  -7  20   3   12.05    1.10 
   7  20  -3    9.95    0.95 
  -7 -20  -3   12.58    1.18 
   7  20   3    9.80    1.00 
   7  20  -4    2.48    0.58 
   7 -20   4    2.42    0.82 
  -7 -20  -4    2.33    0.78 
   7  20   4    2.97    0.87 
   7 -20   5   13.59    1.40 
   7  20  -5   10.87    0.95 
  -7 -20  -5   13.18    1.32 
   7 -20  -5   12.28    1.10 
   8 -20   0    1.26    0.46 
   8  20   0    0.23    0.35 
  -8 -20   0    0.14    0.53 
  -8  20   0    1.07    0.36 
   8 -20   1    6.23    0.88 
   8  20  -1    4.14    0.76 
  -8  20   1    5.42    0.76 
  -8 -20  -1    6.54    1.20 
   8  20   1    6.13    1.08 
  -8 -20   1    7.45    0.83 
  -8  20   2    0.18    0.31 
   8  20  -2    0.46    0.40 
   8 -20   2    0.38    0.40 
  -8 -20  -2    0.30    0.47 
   8  20   2    0.28    0.46 
  -8 -20   2    0.25    0.35 
  -8 -20  -3    2.92    0.71 
   8 -20   3    4.16    0.87 
   8  20  -3    4.61    0.79 
   8  20   3    2.21    0.54 
   8 -20   4   -0.28    0.34 
   8  20  -4   -0.36    0.35 
  -8 -20  -4   -0.02    0.38 
   8 -20  -4    0.18    0.32 
  -9 -20   0    0.44    0.43 
   9 -20   0    0.18    0.35 
   9 -20   0    0.20    0.36 
   9 -20   1    3.76    0.72 
   9  20  -1    2.17    0.56 
  -9 -20  -1    2.51    0.84 
   9  20   1    2.62    0.69 
  -9 -20   1    2.24    0.61 
   9 -20  -1    3.81    0.64 
   9 -20   2    0.77    0.41 
  -9 -20  -2    1.02    0.57 
   9  20  -2    1.04    0.39 
   9  20   2    1.06    0.63 
   9 -20  -2    1.32    0.44 
   9 -20   3   13.17    1.17 
   9  20  -3   14.58    1.12 
  -9 -20  -3   14.29    1.19 
   9 -20  -3   12.00    1.02 
   9  20   3   14.99    1.20 
  -9 -20  -4    4.73    0.87 
   9 -20   4    2.63    0.64 
   9  20  -4    3.17    0.69 
   9 -20  -4    2.43    0.59 
 -10 -20   0    0.39    0.44 
  10  20   0   -0.31    0.32 
  10  20  -1  131.41    3.30 
  10 -20   1  129.11    2.97 
 -10 -20  -1  130.08    3.65 
  10  20   1  126.37    3.63 
  10 -20  -1  129.41    2.80 
  10 -20   2    0.31    0.34 
 -10 -20  -2    0.65    0.45 
  10  20  -2   -0.31    0.33 
  10  20   2   -0.78    0.25 
  10 -20  -2   -0.04    0.23 
  10  20  -3   78.92    2.42 
  10 -20   3   81.10    2.51 
 -10 -20  -3   79.26    2.56 
  10  20   3   78.47    2.53 
  10 -20  -3   77.96    2.21 
  11  20   0   -1.42    0.36 
  11  20  -1    0.31    0.54 
 -11 -20  -1    1.06    0.60 
  11  20   1   -0.40    0.40 
  11 -20  -1    0.43    0.31 
  11 -20   2    0.64    0.39 
  11  20  -2   -0.02    0.33 
 -11 -20  -2    0.49    0.40 
  11  20   2   -0.03    0.40 
  11 -20  -2    0.01    0.32 
  12  20   0    0.48    0.47 
  12  20  -1    5.47    0.94 
  12 -20  -1    5.12    0.79 
  12  20   1    5.39    1.18 
   0  21   0    0.56    0.37 
   0 -21   0    0.04    0.38 
   0  21   1   15.55    1.39 
   0  21  -1   15.81    1.26 
   0 -21  -1   15.66    1.24 
   0 -21   1   17.47    1.30 
   0  21  -2    0.35    0.35 
   0 -21   2    0.22    0.50 
   0  21   2   -0.39    0.49 
   0 -21  -2   -0.11    0.37 
   0  21  -3    8.88    0.96 
   0 -21   3    7.24    1.45 
   0 -21  -3    9.43    1.44 
   0  21   3    8.23    1.25 
   0 -21   4   -0.42    0.46 
   0 -21  -4    1.03    0.66 
   0  21   4   -0.51    0.31 
   0 -21   5    2.02    0.78 
   0  21   5    2.71    0.78 
   0 -21  -5    2.75    0.90 
   0  21   6   -0.17    0.46 
   0 -21   6   -0.18    0.69 
  -1  21   0   -0.11    0.32 
   1  21   0    0.49    0.42 
   1 -21   0   -0.01    0.34 
  -1 -21   0   -0.06    0.27 
  -1 -21  -1    0.27    0.43 
   1 -21   1    0.68    0.63 
   1  21  -1    0.40    0.41 
  -1  21   1    1.48    0.62 
  -1 -21   1    1.27    0.47 
   1  21   1    0.75    0.43 
   1 -21  -1    0.20    0.37 
  -1  21  -1    0.46    0.41 
  -1 -21  -2    2.63    0.93 
   1 -21   2    2.49    0.76 
  -1  21   2    1.36    0.67 
   1  21  -2    1.60    0.56 
  -1  21  -2    1.81    0.50 
  -1 -21   2    1.60    0.69 
   1 -21  -2    1.30    0.62 
   1  21   2    1.08    0.54 
  -1  21   3    3.68    0.85 
   1 -21   3    2.51    0.82 
  -1 -21  -3    3.08    0.81 
   1  21  -3    3.12    0.77 
  -1  21  -3    4.17    0.71 
   1 -21  -3    3.93    0.99 
  -1 -21   3    0.21    1.33 
   1  21   3    2.81    0.77 
   1 -21   4    2.26    0.82 
  -1  21   4    2.15    0.73 
  -1 -21  -4    1.65    0.65 
   1 -21  -4    2.50    0.76 
  -1 -21   4    2.93    1.07 
   1  21   4    2.96    0.82 
  -1 -21  -5    6.36    1.03 
   1 -21   5    4.53    1.10 
  -1  21   5    4.67    0.93 
   1 -21  -5    5.13    0.97 
  -1 -21   5    3.78    0.94 
   1  21   5    2.99    0.83 
   1 -21   6    1.63    0.88 
  -1  21   6    1.00    0.72 
  -1 -21  -6    1.14    0.63 
  -1 -21   6    2.15    0.90 
   1  21   6    3.13    0.91 
   2 -21   0   41.41    1.88 
  -2  21   0   43.39    2.02 
   2  21   0   39.12    1.94 
  -2 -21   0   41.71    1.85 
   2 -21   1    7.87    1.28 
   2  21  -1    5.15    0.91 
  -2  21   1    4.61    0.86 
  -2 -21  -1    8.37    1.22 
   2 -21  -1    7.24    0.96 
  -2  21  -1    3.99    0.73 
   2  21   1    5.85    0.91 
  -2 -21   1    6.20    0.92 
  -2  21   2   24.96    1.68 
  -2 -21  -2   26.50    2.14 
   2  21  -2   26.38    1.80 
   2 -21   2   27.32    2.19 
  -2 -21   2   26.76    1.84 
   2 -21  -2   25.70    1.50 
  -2  21  -2   25.87    1.32 
   2  21   2   24.81    1.66 
  -2  21   3    3.31    0.79 
   2 -21   3    2.76    0.94 
   2  21  -3    2.85    0.73 
  -2 -21  -3    2.16    0.85 
   2  21   3    1.94    0.69 
   2 -21  -3    1.45    0.54 
  -2 -21   3    4.77    1.35 
  -2  21   4   17.17    1.40 
   2  21  -4   17.64    1.26 
  -2 -21  -4   16.33    1.34 
   2 -21   4   19.46    1.94 
  -2 -21   4   19.59    1.93 
   2  21   4   21.84    1.89 
   2 -21  -4   17.14    1.47 
  -2  21   5    0.58    0.46 
   2 -21   5    2.47    0.89 
  -2 -21  -5    0.90    0.57 
  -2 -21   5    1.02    0.62 
   2  21   5    0.62    0.54 
   2 -21   6    7.85    1.38 
  -2 -21  -6    5.14    0.96 
  -2  21   6    4.52    0.96 
   2  21   6    3.95    1.15 
   3 -21   0   -0.17    0.31 
   3  21   0   -0.15    0.31 
  -3 -21   0    0.46    0.37 
  -3  21   0   -0.11    0.40 
  -3  21   1    0.29    0.41 
  -3 -21  -1    0.21    0.47 
   3  21  -1   -0.05    0.32 
   3 -21   1    0.66    0.54 
   3  21   1    0.57    0.43 
  -3  21  -1    0.37    0.39 
  -3 -21   1    0.28    0.34 
   3 -21  -1   -0.36    0.29 
   3  21  -2    0.60    0.50 
  -3  21   2    0.08    0.36 
  -3 -21  -2   -0.31    0.47 
   3 -21   2   -0.40    0.29 
  -3 -21   2    0.22    0.36 
   3  21   2   -0.23    0.30 
   3 -21  -2   -0.18    0.27 
  -3  21  -2    0.05    0.30 
  -3  21   3    6.65    1.00 
  -3 -21  -3    5.33    0.98 
   3  21  -3    5.10    0.99 
   3 -21   3    6.60    1.18 
   3 -21  -3    5.48    0.83 
  -3 -21   3    8.96    1.61 
   3  21   3    5.94    0.99 
   3 -21   4    0.16    0.45 
   3  21  -4    0.02    0.34 
  -3  21   4    0.53    0.46 
  -3 -21  -4    0.06    0.45 
  -3 -21   4    0.70    0.64 
   3 -21  -4    0.38    0.47 
   3  21   4    0.32    0.49 
  -3 -21  -5    9.63    1.30 
  -3  21   5    9.84    1.30 
   3 -21   5    8.94    1.40 
  -3 -21   5    8.85    1.33 
   3  21   5    7.47    1.25 
   4  21   0    0.82    0.54 
  -4 -21   0    1.05    0.48 
   4 -21   0    1.01    0.52 
  -4  21   0    1.81    0.58 
  -4  21   1   13.05    1.20 
   4  21  -1   17.24    1.54 
  -4 -21  -1   15.43    1.58 
   4 -21   1   14.58    1.45 
   4 -21  -1   14.50    1.12 
   4  21   1   15.01    1.34 
  -4  21  -1   12.39    1.16 
  -4 -21   1   14.81    1.05 
  -4 -21  -2    1.02    0.64 
   4 -21   2    1.15    0.63 
  -4  21   2    0.93    0.51 
   4  21  -2    1.81    0.60 
  -4  21  -2    1.74    0.48 
  -4 -21   2    1.97    0.54 
   4  21   2    0.69    0.56 
   4 -21  -2    2.68    0.66 
  -4 -21  -3    5.68    1.08 
   4  21  -3    8.00    1.02 
  -4  21   3    5.79    0.86 
   4 -21   3    5.27    1.06 
  -4 -21   3    7.55    1.66 
   4  21   3    5.56    0.93 
   4 -21  -3    7.37    0.88 
  -4  21   4    0.43    0.39 
   4 -21   4    0.73    0.52 
  -4 -21  -4    1.22    0.72 
   4  21  -4    1.06    0.46 
  -4 -21   4    0.27    0.76 
   4  21   4    2.17    0.79 
  -4  21   5    1.87    0.63 
   4 -21   5    0.99    0.63 
  -4 -21  -5    1.44    0.61 
   4  21   5    1.85    0.94 
   5 -21   0   -0.08    0.33 
   5  21   0    0.39    0.50 
  -5  21   0   -0.09    0.37 
  -5 -21   0    0.33    0.42 
   5  21  -1    0.51    0.46 
  -5  21   1    0.63    0.45 
   5 -21   1    0.31    0.44 
  -5 -21  -1    0.30    0.63 
   5  21   1   -0.26    0.30 
   5 -21  -1    0.19    0.34 
  -5  21  -1    0.04    0.27 
  -5 -21   1    0.58    0.35 
  -5 -21  -2    1.67    0.81 
  -5  21   2    0.74    0.40 
   5  21  -2    1.09    0.57 
   5 -21   2    1.62    0.70 
  -5 -21   2    0.88    0.46 
   5  21   2    2.17    0.62 
   5 -21  -2    1.82    0.61 
   5 -21   3    0.74    0.53 
  -5  21   3    0.37    0.40 
   5  21  -3    0.34    0.36 
  -5 -21  -3    0.24    0.46 
   5  21   3    0.72    0.43 
  -5 -21   3   -2.37    0.56 
   5  21  -4    7.50    1.01 
   5 -21   4    4.84    0.98 
  -5  21   4    4.22    0.84 
  -5 -21  -4    5.57    0.98 
  -5 -21   4    2.61    1.11 
  -5 -21  -5    1.23    0.62 
   5 -21   5    0.33    0.50 
  -5  21   5    0.42    0.39 
   5  21  -5    1.25    0.50 
   5  21   5    1.49    1.03 
  -6  21   0   22.96    1.25 
   6 -21   0   23.29    1.56 
  -6 -21   0   24.73    1.56 
   6  21   0   28.59    1.84 
  -6 -21  -1   27.12    1.88 
   6 -21   1   30.46    1.75 
   6  21  -1   31.36    1.82 
  -6  21   1   30.62    1.58 
  -6 -21   1   30.94    1.50 
  -6  21  -1   29.78    1.41 
   6  21   1   31.60    1.86 
   6 -21  -1   33.57    2.00 
  -6 -21  -2   22.56    1.58 
   6 -21   2   21.08    1.53 
  -6  21   2   21.34    1.39 
   6  21  -2   21.13    1.42 
  -6 -21   2   21.16    1.26 
   6  21   2   21.85    1.56 
   6 -21  -2   19.60    1.24 
   6  21  -3   18.77    1.32 
  -6  21   3   15.23    1.20 
  -6 -21  -3   20.54    1.57 
   6 -21   3   18.82    1.57 
  -6 -21   3   20.71    1.94 
   6  21   3   18.25    1.38 
  -6 -21  -4    8.26    1.16 
   6 -21   4    7.37    1.14 
  -6  21   4    8.53    0.94 
   6  21  -4    9.64    0.92 
   6  21   4    9.02    1.13 
   6 -21   5    7.41    1.29 
   6  21  -5    7.79    0.94 
  -6 -21  -5    7.28    1.13 
   7 -21   0   -0.05    0.34 
  -7 -21   0   -0.02    0.32 
  -7  21   0    0.12    0.26 
   7  21   0   -0.15    0.29 
  -7  21   1    0.69    0.37 
  -7 -21  -1    1.39    0.62 
   7 -21   1    0.50    0.44 
   7  21  -1    0.60    0.46 
   7  21   1    0.46    0.48 
  -7  21  -1    1.01    0.48 
  -7 -21   1    1.00    0.44 
   7 -21  -1    1.01    0.54 
  -7  21   2   -0.15    0.28 
  -7 -21  -2   -0.03    0.33 
   7 -21   2   -0.29    0.26 
   7  21  -2    0.06    0.31 
  -7 -21   2   -0.10    0.26 
   7  21   2    0.10    0.34 
  -7 -21  -3   10.66    1.19 
  -7  21   3    9.45    0.96 
   7 -21   3   10.17    1.11 
   7  21  -3   10.82    1.01 
   7  21   3   10.78    1.09 
  -7 -21  -4   -0.19    0.36 
   7  21  -4    0.08    0.29 
   7 -21   4    0.11    0.43 
   7  21   4    0.09    0.15 
   7  21  -5   11.06    0.94 
   7 -21   5   11.34    1.25 
  -7 -21  -5   11.31    1.17 
   7 -21  -5   10.78    1.11 
  -8  21   0    5.41    0.70 
   8  21   0    5.62    0.91 
   8 -21   0    5.25    0.80 
  -8 -21   0    5.32    0.87 
   8 -21   1    7.30    1.04 
  -8  21   1    5.30    0.72 
  -8 -21  -1    6.56    1.13 
   8  21  -1    7.22    0.97 
   8  21   1    4.97    0.83 
  -8 -21   1    6.69    0.82 
  -8 -21  -2    3.20    0.76 
   8  21  -2    3.77    0.73 
  -8  21   2    3.37    0.59 
   8 -21   2    4.41    0.80 
  -8 -21   2    4.24    0.70 
   8  21   2    4.08    0.71 
  -8 -21  -3    5.72    1.00 
   8 -21   3    3.43    0.75 
   8  21  -3    2.62    0.52 
   8  21   3    4.68    0.80 
   8  21  -4    2.37    0.61 
   8 -21   4    2.63    0.74 
  -8 -21  -4    2.00    0.55 
   8 -21  -4    2.26    0.56 
   9  21   0    0.02    0.41 
   9 -21   0    0.05    0.35 
  -9 -21   0   -0.47    0.26 
  -9 -21  -1   -0.23    0.32 
   9  21  -1    0.11    0.30 
   9 -21   1   -0.31    0.27 
   9  21   1    0.47    0.42 
  -9 -21   1    0.57    0.29 
   9 -21   2    2.17    0.62 
   9  21  -2    2.01    0.60 
  -9 -21  -2    1.81    0.60 
   9  21   2    1.51    0.55 
   9 -21  -2    2.05    0.51 
   9 -21   3    0.14    0.37 
  -9 -21  -3    0.20    0.41 
   9  21  -3    0.28    0.36 
   9  21   3   -0.37    0.37 
   9 -21  -3   -0.09    0.32 
  -9 -21  -4    3.01    0.62 
   9  21  -4    3.16    0.68 
   9 -21   4    2.95    0.74 
   9 -21  -4    3.63    0.69 
 -10 -21   0   12.80    1.03 
  10  21   0   12.38    1.10 
  10  21  -1   34.26    1.66 
  10 -21   1   36.73    1.52 
 -10 -21  -1   36.84    1.81 
  10  21   1   33.77    1.79 
  10 -21  -1   35.46    1.48 
  10 -21   2   12.34    0.98 
  10  21  -2   11.85    1.06 
 -10 -21  -2   12.60    1.22 
  10  21   2   14.78    1.20 
  10 -21  -2   12.19    1.01 
 -10 -21  -3   25.41    1.56 
  10 -21   3   24.24    1.52 
  10  21  -3   24.24    1.45 
  10 -21  -3   25.40    1.37 
  10  21   3   24.25    1.49 
  11  21   0   -0.65    0.36 
 -11 -21  -1    1.77    0.66 
  11  21  -1    2.00    0.61 
  11  21   1    2.06    0.62 
  11 -21  -1    1.71    0.45 
  11  21  -2    0.31    0.41 
  11 -21   2    0.33    0.37 
  11  21   2   -0.05    0.42 
  12  21   0    7.60    1.06 
   0  22   0   11.17    1.09 
   0 -22   0   10.17    1.13 
   0 -22   1    0.36    0.30 
   0 -22  -1    0.02    0.34 
   0  22  -1    0.32    0.29 
   0  22   1   -0.06    0.30 
   0  22  -2   13.58    1.14 
   0 -22   2   11.70    1.58 
   0 -22  -2   12.83    1.33 
   0  22   2   13.06    1.26 
   0  22   3   -0.47    0.36 
   0  22  -3   -0.26    0.30 
   0 -22   3   -0.12    0.42 
   0 -22  -3    0.01    0.51 
   0 -22  -4    6.27    1.11 
   0  22   4    6.86    1.17 
   0 -22   4    6.87    1.30 
   0 -22  -5   -0.10    0.55 
   0  22   5   -0.12    0.27 
   0 -22   5   -0.57    0.33 
   1  22   0   -0.09    0.23 
  -1 -22   0    0.10    0.30 
  -1  22   0   -0.02    0.31 
   1 -22   0    0.05    0.32 
   1  22  -1    0.00    0.31 
  -1  22   1    0.03    0.34 
  -1 -22  -1   -0.01    0.33 
   1 -22   1    0.01    0.43 
  -1  22  -1   -0.13    0.28 
   1 -22  -1    0.47    0.44 
   1  22   1    0.09    0.36 
  -1 -22   1   -0.39    0.25 
  -1 -22  -2    0.06    0.56 
   1  22  -2    0.36    0.35 
   1 -22   2    0.31    0.46 
  -1  22   2    0.48    0.45 
   1  22   2    0.08    0.36 
  -1  22  -2    0.06    0.29 
   1 -22  -2    0.13    0.38 
  -1 -22   2    0.28    0.50 
   1  22  -3    0.86    0.50 
  -1  22   3    0.32    0.42 
  -1 -22  -3    0.36    0.53 
   1 -22   3    0.16    0.52 
   1  22   3   -2.05    0.46 
  -1  22  -3    0.15    0.32 
   1 -22  -3    0.89    0.54 
  -1 -22   3   -0.32    0.51 
  -1 -22  -4    0.55    0.58 
  -1  22   4    1.02    0.58 
   1 -22   4    1.27    0.73 
   1  22   4    0.00    0.45 
   1 -22  -4    1.31    0.66 
  -1 -22   4   -1.08    0.45 
  -1 -22  -5   -0.33    0.38 
   1 -22   5   -0.73    0.43 
  -1  22   5   -0.11    0.38 
   1  22   5    0.76    0.55 
  -1 -22   5   -0.44    0.45 
   1 -22  -5   -0.07    0.41 
   2 -22   0    0.87    0.51 
   2  22   0    0.70    0.43 
  -2  22   0    0.80    0.46 
  -2 -22   0    1.61    0.59 
   2  22  -1    2.27    0.61 
  -2  22   1    1.81    0.59 
   2 -22   1    2.50    0.73 
  -2 -22  -1    1.02    0.51 
  -2  22  -1    1.59    0.53 
   2 -22  -1    2.45    0.60 
   2  22   1    0.96    0.47 
  -2 -22   1    1.12    0.44 
   2 -22   2    0.93    0.65 
  -2  22   2    0.05    0.34 
  -2 -22  -2    0.71    0.60 
   2  22  -2   -0.06    0.29 
   2 -22  -2    0.28    0.49 
   2  22   2   -0.35    0.23 
  -2 -22   2    0.12    0.33 
  -2  22  -2   -0.30    0.25 
  -2  22   3    2.99    0.80 
   2 -22   3    2.46    0.87 
  -2 -22  -3    2.45    0.87 
   2  22  -3    3.64    0.84 
  -2 -22   3    2.78    1.23 
   2 -22  -3    2.64    0.73 
   2  22   3    3.46    1.07 
   2  22  -4   -0.31    0.35 
   2 -22   4    0.68    0.51 
  -2 -22  -4    0.04    0.44 
  -2  22   4   -0.42    0.30 
  -2 -22   4    0.00    0.57 
   2 -22  -4   -0.20    0.36 
   2  22   4   -0.41    0.37 
  -2 -22  -5    2.42    0.66 
  -2  22   5    2.02    0.61 
   2 -22   5    2.44    0.84 
   2  22   5    2.15    0.76 
  -2 -22   5    2.05    0.95 
  -3 -22   0   -0.06    0.29 
  -3  22   0   -0.05    0.34 
   3 -22   0   -0.17    0.34 
   3  22   0    0.00    0.26 
   3  22  -1    0.08    0.39 
  -3  22   1    0.57    0.43 
   3 -22   1   -0.46    0.33 
  -3 -22  -1   -0.60    0.27 
   3  22   1   -0.37    0.23 
  -3  22  -1   -0.14    0.32 
   3 -22  -1    0.17    0.35 
  -3 -22   1   -0.20    0.24 
   3  22  -2    0.09    0.32 
   3 -22   2    0.17    0.51 
  -3  22   2   -0.14    0.31 
  -3 -22  -2   -0.12    0.46 
   3  22   2    0.09    0.34 
  -3  22  -2    0.25    0.31 
   3 -22  -2    0.49    0.37 
  -3 -22   2   -0.55    0.23 
  -3 -22  -3    0.76    0.64 
   3 -22   3   -0.01    0.38 
  -3  22   3    0.08    0.36 
   3  22  -3   -0.14    0.32 
  -3 -22   3   -0.28    0.49 
   3  22   3    0.26    0.39 
   3 -22  -3    0.22    0.35 
   3 -22   4   -0.08    0.43 
  -3 -22  -4   -0.20    0.36 
  -3  22   4    0.44    0.45 
   3  22  -4    0.11    0.28 
  -3 -22   4    0.31    0.66 
   3  22   4    0.42    0.50 
   3 -22  -4   -0.14    0.34 
  -3 -22  -5    0.22    0.48 
   3 -22   5    0.25    0.45 
  -3  22   5   -0.29    0.38 
   3  22   5    0.10    0.56 
  -3 -22   5    0.36    0.62 
  -4 -22   0    6.53    1.00 
   4  22   0    5.82    1.04 
  -4  22   0    7.08    0.99 
   4 -22   0    9.05    1.17 
   4 -22   1    1.23    0.69 
  -4  22   1    2.42    0.69 
   4  22  -1    1.64    0.71 
  -4 -22  -1    1.50    0.69 
   4  22   1    1.56    0.59 
  -4  22  -1    0.89    0.43 
  -4 -22   1    0.93    0.40 
   4 -22  -1    1.22    0.44 
  -4  22   2    7.03    1.16 
   4 -22   2    6.55    1.23 
   4  22  -2    7.44    1.07 
  -4 -22  -2    7.59    1.33 
   4  22   2    9.20    1.23 
   4 -22  -2    7.16    0.93 
  -4 -22   2    9.29    0.95 
   4  22  -3    0.95    0.48 
  -4  22   3    0.49    0.43 
   4 -22   3    0.10    0.49 
  -4 -22  -3    0.66    0.53 
   4  22   3    1.11    0.49 
   4 -22  -3    0.82    0.41 
  -4  22   4    4.51    0.87 
   4  22  -4    5.78    0.90 
   4 -22   4    3.35    0.89 
  -4 -22  -4    2.95    0.79 
  -4 -22   4    2.21    0.97 
   4  22   4    3.65    0.97 
  -4  22   5    0.18    0.40 
   4 -22   5    1.15    0.58 
  -4 -22  -5   -0.10    0.49 
   4  22   5    0.50    0.76 
  -5  22   0   -0.05    0.35 
   5  22   0   -0.45    0.30 
   5 -22   0    0.44    0.35 
  -5 -22   0    0.20    0.25 
  -5  22   1    0.26    0.35 
   5  22  -1   -0.08    0.41 
   5 -22   1    0.42    0.45 
  -5 -22  -1   -0.36    0.40 
  -5 -22   1    0.13    0.25 
  -5  22  -1    0.14    0.33 
   5 -22  -1    0.30    0.40 
   5  22   1    0.18    0.34 
  -5 -22  -2    0.41    0.46 
  -5  22   2   -0.08    0.29 
   5 -22   2   -0.32    0.43 
   5  22  -2   -0.08    0.34 
  -5 -22   2    0.22    0.29 
   5 -22  -2   -0.06    0.27 
   5  22   2    0.15    0.33 
  -5  22   3    0.44    0.39 
   5 -22   3    1.02    0.60 
   5  22  -3    0.97    0.52 
  -5 -22  -3    0.58    0.52 
  -5 -22   3   -1.04    0.48 
   5  22   3   -0.30    0.36 
  -5 -22  -4    0.60    0.55 
   5  22  -4    0.47    0.38 
  -5  22   4    0.18    0.36 
   5 -22   4    0.68    0.62 
   5  22   4    1.25    0.88 
  -5 -22   4   -0.63    0.82 
  -5  22   5    0.55    0.50 
   5 -22   5    0.82    0.72 
  -5 -22  -5    0.31    0.55 
   5  22   5    0.46    0.81 
  -6 -22   0    0.83    0.47 
   6  22   0    0.84    0.51 
  -6  22   0    0.94    0.47 
  -6 -22  -1    0.51    0.49 
  -6  22   1    0.22    0.33 
   6  22  -1    0.22    0.42 
   6 -22   1    0.12    0.44 
   6  22   1    0.67    0.44 
  -6  22  -1    0.31    0.35 
  -6 -22   1    0.65    0.34 
   6 -22  -1    0.73    0.59 
  -6  22   2    0.79    0.47 
   6  22  -2    1.36    0.60 
  -6 -22  -2    0.83    0.52 
   6 -22   2    0.96    0.59 
  -6 -22   2    0.08    0.45 
   6 -22  -2    0.73    0.41 
   6  22   2    1.46    0.55 
   6 -22   3    0.28    0.46 
  -6 -22  -3   -0.39    0.26 
  -6  22   3    0.34    0.39 
   6  22  -3   -0.34    0.28 
   6  22   3    0.49    0.43 
  -6 -22   3    0.00    0.56 
  -6 -22  -4    0.28    0.54 
   6  22  -4   -0.11    0.26 
   6 -22   4    0.32    0.39 
  -6  22   4    0.20    0.33 
   6  22   4   -0.04    0.44 
   6 -22   5    0.68    0.58 
   6  22  -5    0.81    0.50 
  -6 -22  -5    0.62    0.52 
  -7  22   0    0.13    0.26 
  -7 -22   0    0.23    0.31 
   7  22   0    0.02    0.37 
   7 -22   0   -0.16    0.30 
  -7  22   1   -0.05    0.28 
  -7 -22  -1    0.75    0.56 
   7  22  -1   -0.30    0.31 
   7 -22   1   -0.11    0.25 
   7  22   1    0.00    0.29 
   7 -22  -1   -0.25    0.31 
  -7 -22   1   -0.23    0.28 
  -7 -22  -2   -1.31    0.41 
   7 -22   2   -0.11    0.30 
   7  22  -2    0.23    0.30 
  -7  22   2    0.11    0.33 
   7  22   2   -0.08    0.33 
  -7 -22   2    0.13    0.25 
   7 -22   3   -0.06    0.38 
  -7  22   3    0.22    0.33 
  -7 -22  -3    0.51    0.48 
   7  22  -3   -0.12    0.26 
   7  22   3    0.27    0.35 
   7  22  -4    0.11    0.30 
  -7 -22  -4   -0.08    0.34 
   7 -22   4    0.38    0.44 
   7  22   4    0.03    0.35 
   8 -22   0    1.70    0.49 
  -8 -22   0    1.38    0.51 
   8  22   0    1.34    0.55 
  -8  22   0    1.48    0.47 
  -8 -22  -1    4.06    1.03 
   8 -22   1    4.12    0.85 
   8  22  -1    2.95    0.73 
  -8  22   1    2.85    0.56 
  -8 -22   1    2.55    0.58 
   8  22   1    3.22    0.64 
   8  22  -2    1.36    0.49 
   8 -22   2    1.88    0.57 
  -8  22   2    1.31    0.46 
  -8 -22  -2    0.88    0.59 
   8  22   2    0.86    0.46 
  -8 -22   2    1.98    0.57 
   8 -22   3    1.90    0.59 
   8  22  -3    2.02    0.50 
  -8 -22  -3    2.01    0.71 
   8  22   3    2.13    0.54 
   8 -22   4    1.92    0.62 
   8  22  -4    2.84    0.67 
  -8 -22  -4    1.36    0.55 
   8 -22  -4    1.46    0.49 
   8  22   4    2.65    0.87 
  -9 -22   0   -1.02    0.23 
   9  22   0    0.17    0.38 
   9 -22   1    0.39    0.36 
  -9 -22  -1    0.88    0.55 
   9  22  -1   -0.16    0.38 
   9  22   1    0.04    0.43 
  -9 -22   1    0.50    0.35 
   9  22  -2   -0.18    0.28 
  -9 -22  -2   -0.34    0.35 
   9 -22   2   -0.35    0.25 
   9 -22  -2    0.38    0.27 
   9  22   2   -0.15    0.21 
  -9 -22  -3    0.84    0.57 
   9  22  -3    0.49    0.36 
   9 -22   3    1.58    0.67 
   9  22   3    3.13    0.79 
   9 -22  -3    0.87    0.37 
 -10 -22   0    1.39    0.48 
  10  22   0    1.85    0.58 
  10 -22   1    0.52    0.40 
 -10 -22  -1    0.85    0.54 
  10  22  -1    0.35    0.41 
  10  22   1    0.34    0.45 
  10 -22  -1    0.38    0.33 
  10  22  -2   -0.07    0.33 
  10 -22   2    0.23    0.38 
 -10 -22  -2   -0.56    0.38 
  10  22   2    0.16    0.39 
  10 -22  -2   -0.20    0.28 
  10 -22   3    0.08    0.39 
 -10 -22  -3   -0.12    0.43 
  10  22  -3    0.28    0.38 
  10 -22  -3    0.17    0.37 
  10  22   3   -0.76    0.49 
  11  22   0   -0.01    0.25 
 -11 -22  -1    0.50    0.54 
  11  22  -1    0.19    0.39 
  11 -22  -1    0.25    0.33 
  11  22   1    0.11    0.43 
  11 -22   2    0.24    0.36 
  11  22  -2    0.15    0.39 
 -11 -22  -2   -1.01    0.29 
  11 -22  -2    0.08    0.33 
  11  22   2   -0.35    0.39 
   0 -23   0    2.45    0.58 
   0  23   0    2.47    0.57 
   0  23  -1   99.19    2.73 
   0 -23  -1  100.95    3.03 
   0 -23   1   99.89    2.97 
   0  23   1   98.38    2.94 
   0  23   2   -0.61    0.39 
   0 -23   2    0.40    0.47 
   0  23  -2    0.09    0.37 
   0 -23  -2   -0.13    0.42 
   0  23  -3   58.17    2.14 
   0 -23  -3   58.15    2.80 
   0 -23   3   57.97    3.31 
   0  23   3   58.73    2.65 
   0 -23   4   -0.50    0.41 
   0 -23  -4    0.15    0.60 
   0  23   4    0.44    0.54 
   0 -23  -5   12.53    1.39 
   0 -23   5   19.34    1.91 
   0  23   5   17.91    1.56 
  -1 -23   0    0.49    0.35 
  -1  23   0   -0.12    0.28 
   1  23   0    0.01    0.28 
   1 -23   0    0.14    0.34 
  -1 -23  -1    2.93    0.76 
  -1  23   1    1.92    0.60 
   1 -23   1    2.78    0.73 
   1  23  -1    2.41    0.63 
  -1  23  -1    2.24    0.58 
   1 -23  -1    3.52    0.71 
  -1 -23   1    2.77    0.65 
   1  23   1    1.29    0.49 
   1 -23   2    2.41    0.72 
  -1 -23  -2    0.35    0.48 
   1  23  -2    0.54    0.37 
  -1  23   2    1.36    0.49 
   1  23   2    1.41    0.56 
  -1  23  -2    2.76    0.60 
   1 -23  -2    2.35    0.62 
  -1 -23   2    0.20    0.38 
  -1  23   3    6.46    1.03 
   1  23  -3    5.78    0.93 
  -1 -23  -3    4.86    1.09 
   1 -23   3    4.83    1.20 
   1  23   3    5.47    0.93 
  -1 -23   3    6.43    1.44 
   1 -23  -3    6.39    1.01 
  -1  23   4    1.36    0.63 
   1 -23   4   -0.31    0.53 
  -1 -23  -4    1.31    0.72 
   1 -23  -4    1.18    0.74 
  -1 -23   4    2.52    0.91 
   1  23   4    1.41    0.61 
  -1  23   5   20.01    1.62 
   1 -23   5   17.65    1.84 
  -1 -23  -5   18.82    1.58 
   1 -23  -5   17.78    1.61 
   1  23   5   21.41    1.79 
  -1 -23   5   16.21    1.78 
   2  23   0    0.21    0.39 
  -2 -23   0   -0.28    0.29 
  -2  23   0    0.24    0.43 
   2 -23   0    0.03    0.32 
   2  23  -1    0.43    0.33 
   2 -23   1    0.47    0.43 
  -2 -23  -1    0.30    0.42 
  -2  23   1    0.38    0.42 
  -2  23  -1   -0.02    0.23 
  -2 -23   1    0.61    0.42 
   2 -23  -1    0.02    0.33 
   2  23   1    0.39    0.41 
   2  23  -2    0.12    0.39 
   2 -23   2   -0.30    0.41 
  -2 -23  -2   -0.21    0.45 
  -2  23   2   -0.16    0.30 
  -2  23  -2   -0.11    0.29 
   2 -23  -2    0.33    0.35 
   2  23   2   -0.10    0.28 
  -2 -23   2   -0.15    0.32 
   2  23  -3    0.46    0.49 
   2 -23   3    1.22    0.71 
  -2 -23  -3   -0.21    0.44 
  -2  23   3    0.65    0.46 
  -2 -23   3    0.97    0.78 
   2  23   3   -0.04    0.35 
   2 -23  -3    0.25    0.38 
  -2  23   4    0.79    0.54 
  -2 -23  -4    0.23    0.47 
   2 -23   4    0.51    0.60 
  -2 -23   4    1.26    0.81 
   2  23   4    0.39    0.49 
   2 -23  -4    0.45    0.48 
   2 -23   5   -0.77    0.57 
  -2 -23  -5   -0.02    0.43 
  -2  23   5   -0.05    0.49 
  -2 -23   5    0.04    0.57 
   2  23   5    0.47    0.55 
   3 -23   0   -0.10    0.33 
  -3 -23   0   -0.76    0.19 
  -3  23   0    0.10    0.30 
   3  23   0   -0.26    0.27 
  -3  23   1    1.38    0.51 
  -3 -23  -1    1.17    0.56 
   3 -23   1    0.90    0.54 
   3  23  -1    0.23    0.37 
  -3  23  -1    1.67    0.55 
   3 -23  -1    1.46    0.49 
   3  23   1    2.11    0.69 
   3 -23   2    1.04    0.67 
  -3  23   2    2.08    0.65 
  -3 -23  -2    0.81    0.64 
   3  23  -2    1.12    0.61 
  -3  23  -2    1.70    0.47 
  -3 -23   2    1.22    0.49 
   3  23   2    1.00    0.49 
  -3  23   3    6.86    1.06 
   3  23  -3    8.50    1.18 
   3 -23   3    8.94    1.48 
  -3 -23  -3    8.19    1.42 
  -3 -23   3    8.42    1.38 
   3 -23  -3   10.96    1.01 
   3  23   3    7.75    1.03 
   3  23  -4    2.42    0.64 
  -3 -23  -4    1.72    0.64 
  -3  23   4   -1.20    0.55 
   3 -23   4    1.92    0.79 
   3  23   4    2.06    0.65 
   3 -23  -4    1.78    0.58 
   3 -23   5   12.58    1.77 
  -3 -23  -5    9.06    1.19 
  -3  23   5   15.66    1.38 
  -3 -23   5   12.34    1.72 
   3  23   5   14.23    1.57 
   4 -23   0   14.13    1.33 
  -4 -23   0   16.12    1.21 
   4  23   0   12.34    1.26 
  -4  23   0   13.86    1.19 
  -4 -23  -1   80.28    3.14 
   4 -23   1   82.85    3.18 
  -4  23   1   80.83    2.89 
   4  23  -1   80.01    2.92 
  -4 -23   1   80.30    2.74 
   4 -23  -1   77.50    2.38 
   4  23   1   78.83    2.72 
  -4  23  -1   81.36    2.49 
   4 -23   2    6.59    1.26 
  -4 -23  -2    6.56    1.17 
   4  23  -2    7.43    1.05 
  -4  23   2    4.82    0.90 
  -4 -23   2    7.88    1.03 
   4 -23  -2    6.51    0.85 
   4  23   2    5.58    0.97 
  -4 -23  -3   47.61    2.48 
   4  23  -3   44.14    1.94 
   4 -23   3   41.24    2.45 
  -4  23   3   45.04    2.35 
  -4 -23   3   47.10    2.49 
   4 -23  -3   43.52    1.73 
   4  23   3   45.48    2.07 
  -4  23   4    6.45    1.05 
   4  23  -4    5.69    0.81 
   4 -23   4    8.47    1.38 
  -4 -23  -4    4.77    0.98 
   4  23   4    6.45    1.16 
  -4 -23   4    6.94    1.41 
  -4 -23  -5   18.17    1.62 
  -4  23   5   15.82    1.42 
   4 -23   5   18.91    1.90 
   4  23   5   16.19    1.79 
  -5  23   0   -1.22    0.31 
   5 -23   0    0.01    0.35 
   5  23   0   -0.14    0.29 
  -5 -23   0    0.33    0.38 
   5 -23   1    1.04    0.57 
   5  23  -1    1.21    0.53 
  -5  23   1    1.37    0.55 
  -5 -23  -1   -1.04    0.63 
   5  23   1    1.71    0.56 
   5 -23  -1    0.94    0.43 
  -5  23  -1    1.69    0.52 
  -5 -23   1    1.60    0.61 
   5 -23   2   -0.03    0.39 
  -5 -23  -2   -0.19    0.35 
   5  23  -2    0.39    0.42 
  -5  23   2    0.42    0.44 
   5  23   2    0.00    0.27 
   5 -23  -2    0.01    0.27 
  -5 -23   2   -0.19    0.23 
   5 -23   3   14.51    1.50 
  -5  23   3   11.25    1.15 
   5  23  -3   11.00    1.06 
  -5 -23  -3    6.81    1.13 
   5  23   3   11.68    1.11 
  -5 -23   3   10.57    1.18 
   5 -23   4    0.09    0.43 
   5  23  -4    0.02    0.39 
  -5 -23  -4    0.18    0.48 
  -5  23   4   -0.09    0.31 
  -5 -23   4    0.47    0.81 
   5  23   4   -0.58    0.31 
  -5 -23  -5   10.30    1.30 
   5 -23   5   13.85    1.53 
  -5  23   5   11.86    1.17 
   5  23   5   13.56    1.76 
  -6 -23   0    0.41    0.31 
  -6  23   0    0.59    0.40 
   6  23   0    0.20    0.36 
   6 -23   0    0.05    0.37 
   6  23  -1    0.26    0.42 
  -6  23   1   -0.08    0.30 
  -6 -23  -1    0.66    0.50 
   6 -23   1    0.59    0.47 
   6  23   1    0.04    0.34 
  -6  23  -1    0.03    0.27 
  -6 -23   1    0.04    0.20 
   6 -23  -1    0.13    0.40 
  -6  23   2    0.40    0.39 
   6  23  -2   -0.02    0.34 
   6 -23   2   -0.11    0.37 
  -6 -23  -2    0.15    0.40 
   6  23   2    0.16    0.35 
  -6 -23   2    0.08    0.27 
   6 -23  -2    0.25    0.33 
  -6  23   3    0.45    0.43 
   6 -23   3    0.57    0.49 
   6  23  -3    0.36    0.38 
  -6 -23  -3    0.18    0.41 
  -6 -23   3    1.53    0.67 
   6  23   3   -0.14    0.34 
  -6  23   4    2.09    0.60 
   6  23  -4    0.35    0.41 
  -6 -23  -4    0.82    0.57 
   6 -23   4    0.45    0.52 
   6  23   4    0.49    0.43 
   7  23   0    0.10    0.39 
   7 -23   0   -0.04    0.38 
  -7  23   0   -0.22    0.23 
  -7 -23   0    0.05    0.27 
   7  23  -1    0.72    0.45 
   7 -23   1    0.53    0.47 
  -7  23   1    0.28    0.33 
  -7 -23  -1    1.62    0.65 
  -7 -23   1    0.36    0.33 
   7 -23  -1    0.81    0.46 
   7  23   1    0.72    0.47 
   7  23  -2    1.29    0.55 
   7 -23   2    1.78    0.67 
  -7 -23  -2    1.21    0.67 
  -7  23   2    0.93    0.48 
  -7 -23   2    1.44    0.41 
   7  23   2    1.11    0.54 
   7  23  -3    5.76    0.84 
  -7  23   3    4.43    0.80 
   7 -23   3    5.12    0.96 
  -7 -23  -3    4.35    0.86 
   7  23   3    6.35    0.93 
   7 -23   4    3.74    0.86 
  -7  23   4    4.20    0.78 
  -7 -23  -4    3.53    0.82 
   7  23  -4    4.67    0.74 
   7  23   4    4.01    0.86 
  -8  23   0   23.33    1.33 
   8  23   0   28.58    1.79 
  -8 -23   0   26.01    1.59 
   8 -23   0   24.20    1.46 
   8  23  -1   43.30    2.05 
  -8  23   1   41.88    1.86 
   8 -23   1   45.18    1.99 
  -8 -23  -1   42.48    2.38 
   8  23   1   43.53    2.06 
  -8 -23   1   43.30    1.56 
  -8  23   2   17.07    1.22 
   8 -23   2   20.67    1.47 
   8  23  -2   19.97    1.36 
  -8 -23  -2   17.77    1.58 
  -8 -23   2   19.66    1.29 
   8  23   2   19.25    1.38 
   8  23  -3   29.19    1.56 
   8 -23   3   29.55    1.66 
  -8 -23  -3   30.00    1.89 
   8  23   3   27.70    1.47 
  -8 -23  -4   12.98    1.26 
   8 -23   4   11.27    1.20 
   8  23  -4   13.09    1.10 
   8 -23  -4   12.46    1.07 
   8  23   4   11.78    1.44 
  -9 -23   0    0.19    0.37 
   9  23   0   -0.35    0.33 
  -9 -23  -1    1.13    0.65 
   9 -23   1    1.07    0.46 
   9  23  -1    0.37    0.38 
  -9 -23   1    0.50    0.27 
   9  23   1    0.03    0.38 
   9  23  -2    0.08    0.35 
   9 -23   2   -0.24    0.26 
  -9 -23  -2    0.97    0.57 
   9  23   2    0.18    0.38 
   9 -23   3    6.32    0.98 
   9  23  -3    4.57    0.74 
  -9 -23  -3    5.63    0.97 
   9  23   3    5.31    0.84 
   9 -23  -3    5.63    0.80 
 -10 -23   0    1.15    0.47 
  10  23   0    1.27    0.57 
  10  23  -1    0.72    0.46 
 -10 -23  -1   -0.30    0.40 
  10 -23   1    0.08    0.37 
  10  23   1    0.48    0.45 
  10 -23  -1    0.89    0.40 
  10 -23   2    0.25    0.37 
  10  23  -2    0.23    0.37 
 -10 -23  -2    0.33    0.51 
  10 -23  -2    0.20    0.32 
  11  23   0   -0.04    0.40 
 -11 -23  -1    0.24    0.53 
  11  23  -1    0.09    0.46 
  11  23   1    0.65    0.52 
  11 -23  -1    0.96    0.45 
   0  24   0  378.89    5.85 
   0 -24   0  384.76    5.91 
   0  24   1   -0.09    0.21 
   0 -24  -1    0.29    0.37 
   0  24  -1   -0.05    0.33 
   0 -24   1   -0.19    0.26 
   0  24   2  279.27    5.20 
   0 -24  -2  281.74    5.21 
   0  24  -2  278.02    4.61 
   0 -24   2  281.54    5.84 
   0 -24  -3    0.27    0.40 
   0  24  -3   -0.06    0.34 
   0  24   3    0.27    0.41 
   0 -24   3    0.21    0.48 
   0  24   4  147.65    4.09 
   0 -24   4  136.97    4.93 
   0 -24  -4  146.32    4.29 
   0 -24   5   -0.64    0.47 
   0  24   5    0.37    0.51 
   0 -24  -5    0.36    0.56 
  -1  24   0    0.02    0.34 
  -1 -24   0    0.12    0.33 
   1 -24   0    0.13    0.27 
   1  24   0    0.61    0.41 
  -1  24   1    2.10    0.58 
   1  24  -1    1.03    0.47 
  -1 -24  -1    0.91    0.49 
   1 -24   1    1.24    0.46 
   1 -24  -1    1.13    0.38 
   1  24   1    1.02    0.49 
  -1 -24   1    1.98    0.56 
  -1  24  -1    1.40    0.48 
   1 -24   2    9.23    1.35 
  -1  24   2   10.06    1.08 
  -1 -24  -2    7.91    1.14 
  -1  24  -2   10.27    0.97 
   1  24   2   10.10    1.02 
   1 -24  -2    7.63    1.00 
   1 -24   3    2.71    1.02 
  -1  24   3    2.95    0.73 
  -1 -24  -3    2.83    0.87 
   1  24  -3    3.06    0.68 
   1  24   3    2.40    0.67 
  -1 -24   3    3.72    1.04 
   1 -24  -3    2.35    0.74 
  -1  24   4   19.92    1.60 
  -1 -24  -4   21.97    1.75 
   1 -24   4   20.21    1.96 
   1  24   4   22.61    1.70 
   1 -24  -4   19.80    1.57 
  -1 -24   4   20.85    2.04 
   1 -24   5    6.79    1.31 
  -1  24   5    4.44    0.92 
  -1 -24  -5    4.92    1.08 
  -1 -24   5    4.41    1.22 
   1  24   5    6.19    1.23 
   1 -24  -5    5.49    1.05 
  -2  24   0    1.33    0.72 
   2  24   0    0.97    0.48 
   2 -24   0    0.80    0.39 
  -2 -24   0    0.65    0.38 
   2 -24   1    0.68    0.53 
   2  24  -1    0.42    0.39 
  -2  24   1    1.50    0.61 
  -2 -24  -1    0.62    0.43 
   2 -24  -1    1.17    0.48 
  -2  24  -1    1.17    0.47 
   2  24   1    1.00    0.51 
  -2 -24   1    0.01    0.25 
   2 -24   2    0.42    0.57 
  -2 -24  -2    1.39    0.59 
  -2  24   2    0.73    0.50 
   2  24  -2    0.84    0.48 
  -2  24  -2    0.45    0.34 
   2 -24  -2    0.37    0.37 
   2  24   2    0.39    0.40 
  -2 -24   2    0.95    0.49 
  -2  24   3    0.60    0.47 
   2  24  -3    0.27    0.43 
   2 -24   3    0.10    0.43 
  -2 -24  -3   -0.12    0.49 
  -2 -24   3    0.46    0.60 
   2  24   3    0.28    0.39 
   2 -24  -3    0.37    0.35 
  -2 -24  -4    0.32    0.59 
   2 -24   4    0.39    0.55 
  -2  24   4   -0.10    0.56 
   2 -24  -4    0.10    0.41 
   2  24   4    0.29    0.40 
  -2 -24   4    0.54    0.70 
  -2 -24  -5    1.44    0.64 
  -2  24   5    0.93    0.63 
   2 -24   5    1.05    0.67 
   2  24   5    1.69    0.78 
  -2 -24   5    0.27    0.63 
   3 -24   0   -0.05    0.32 
  -3  24   0    0.00    0.27 
  -3 -24   0    0.33    0.31 
   3  24   0    0.64    0.41 
   3 -24   1    0.98    0.68 
  -3 -24  -1    0.25    0.37 
   3  24  -1    0.40    0.41 
  -3  24   1    0.58    0.45 
   3 -24  -1    0.14    0.29 
  -3  24  -1    0.29    0.36 
  -3 -24   1    1.31    0.47 
   3  24   1    0.46    0.37 
   3 -24   2    5.13    1.18 
  -3  24   2    7.09    1.04 
  -3 -24  -2    4.02    0.99 
   3  24  -2    4.46    0.71 
  -3 -24   2    6.98    1.01 
  -3  24  -2    6.76    0.79 
   3 -24  -2    7.92    1.03 
   3  24   2    5.98    0.87 
   3  24  -3    4.56    0.88 
   3 -24   3    4.49    1.08 
  -3 -24  -3    2.44    0.78 
  -3  24   3    3.47    0.88 
   3 -24  -3    3.45    0.57 
  -3 -24   3    2.79    0.74 
   3  24   3    3.85    0.81 
   3  24  -4   21.46    1.39 
  -3  24   4   24.63    1.70 
   3 -24   4   21.64    1.87 
  -3 -24  -4   20.53    1.65 
   3  24   4   21.75    1.58 
  -3 -24   4   23.41    2.22 
   3 -24   5    3.17    0.95 
  -3  24   5    3.18    0.82 
  -3 -24  -5    4.61    0.87 
  -3 -24   5    4.74    1.39 
   3  24   5    2.80    0.84 
   4 -24   0  272.34    4.83 
   4  24   0  272.51    5.17 
  -4  24   0  272.58    4.71 
  -4 -24   0  271.38    4.74 
  -4 -24  -1    0.38    0.39 
  -4  24   1   -0.25    0.34 
   4  24  -1    0.07    0.33 
   4 -24   1   -0.11    0.38 
   4 -24  -1    0.05    0.31 
  -4  24  -1    0.10    0.30 
  -4 -24   1   -0.33    0.30 
   4  24   1    0.03    0.30 
   4 -24   2  221.53    5.99 
  -4 -24  -2  226.81    5.43 
   4  24  -2  226.46    4.94 
  -4  24   2  226.20    4.80 
   4  24   2  222.03    4.49 
  -4 -24   2  225.72    4.28 
   4 -24  -2  226.78    3.83 
   4  24  -3   -0.01    0.38 
  -4 -24  -3   -0.39    0.40 
  -4  24   3    0.01    0.37 
   4 -24   3   -0.24    0.47 
  -4 -24   3    0.09    0.38 
   4  24   3   -0.08    0.20 
   4 -24  -3   -0.27    0.29 
  -4 -24  -4  121.37    3.77 
   4  24  -4  123.32    3.25 
   4 -24   4  119.09    4.14 
  -4  24   4  121.18    3.58 
  -4 -24   4  120.41    5.03 
   4  24   4  116.31    3.39 
  -4  24   5   -0.07    0.42 
   4 -24   5   -0.66    0.37 
  -4 -24  -5    0.37    0.47 
   4  24   5   -0.39    0.51 
   5 -24   0   -0.19    0.30 
  -5 -24   0    0.30    0.28 
  -5  24   0    0.16    0.34 
   5  24   0    0.12    0.40 
   5  24  -1    0.22    0.50 
  -5  24   1   -0.04    0.37 
  -5 -24  -1    0.43    0.40 
   5 -24   1   -0.17    0.34 
  -5  24  -1    0.01    0.30 
   5  24   1   -0.03    0.31 
  -5 -24   1    0.24    0.27 
   5 -24  -1    0.45    0.38 
   5  24  -2    4.57    0.93 
  -5 -24  -2    4.21    0.94 
   5 -24   2    5.20    1.01 
  -5  24   2    3.89    0.80 
   5 -24  -2    4.60    0.70 
   5  24   2    4.57    0.75 
  -5 -24   2    4.55    0.69 
   5 -24   3    2.50    0.80 
   5  24  -3    2.27    0.49 
  -5  24   3    1.21    0.55 
  -5 -24  -3    1.64    0.71 
  -5 -24   3    1.78    0.71 
   5  24   3    2.03    0.57 
   5 -24   4   12.78    1.73 
   5  24  -4   12.33    1.13 
  -5 -24  -4   15.24    1.46 
  -5  24   4   14.91    1.41 
   5  24   4   13.03    1.26 
  -5 -24   4   11.20    1.89 
   6  24   0    0.65    0.44 
  -6 -24   0    1.36    0.46 
   6 -24   0    1.51    0.53 
  -6  24   0    1.02    0.49 
  -6  24   1    0.51    0.41 
   6  24  -1    0.74    0.49 
  -6 -24  -1    0.31    0.43 
   6 -24   1    0.21    0.46 
  -6 -24   1    0.03    0.29 
   6 -24  -1    0.30    0.35 
  -6  24  -1    0.66    0.39 
   6  24   1   -0.13    0.34 
  -6 -24  -2    4.94    1.05 
   6  24  -2    3.98    0.80 
  -6  24   2    3.16    0.67 
   6 -24   2    2.47    0.75 
  -6 -24   2    5.70    0.92 
   6  24   2    3.14    0.71 
   6 -24  -2    5.11    1.03 
   6 -24   3    0.66    0.52 
  -6 -24  -3    0.38    0.50 
  -6  24   3    0.09    0.38 
   6  24  -3    0.20    0.37 
  -6 -24   3    0.58    0.57 
   6  24   3    0.69    0.43 
   6 -24   4    1.19    0.68 
   6  24  -4    1.91    0.66 
  -6  24   4    1.25    0.60 
  -6 -24  -4    0.54    0.50 
   6  24   4    0.77    0.42 
   7 -24   0    0.11    0.42 
  -7 -24   0   -0.04    0.23 
  -7  24   0    0.41    0.36 
   7  24   0    0.02    0.35 
   7 -24   1    0.34    0.43 
  -7  24   1    0.34    0.36 
   7  24  -1    0.39    0.42 
  -7 -24  -1    0.28    0.42 
   7 -24  -1    0.20    0.34 
   7  24   1    0.23    0.34 
  -7 -24   1    0.02    0.24 
   7 -24   2    9.46    1.27 
  -7  24   2    7.95    0.99 
  -7 -24  -2    8.75    1.25 
   7  24  -2    7.48    1.02 
  -7 -24   2    8.72    0.79 
   7  24   2    9.95    1.01 
  -7  24   3    1.76    0.55 
   7 -24   3    2.02    0.68 
  -7 -24  -3    2.69    0.93 
   7  24  -3    1.47    0.59 
   7  24   3    1.95    0.55 
   7 -24   4   15.99    1.47 
  -7 -24  -4   15.60    1.52 
   7  24  -4   14.15    1.13 
  -7  24   4   15.06    1.23 
   7  24   4   16.03    1.25 
   8  24   0  132.30    3.76 
   8 -24   0  129.85    3.11 
  -8 -24   0  132.26    3.12 
  -8  24   0  130.93    2.82 
   8 -24   1    0.27    0.37 
   8  24  -1   -0.12    0.36 
  -8 -24  -1   -0.42    0.33 
  -8  24   1   -0.28    0.26 
  -8 -24   1    0.05    0.26 
   8  24   1   -0.10    0.33 
   8  24  -2  117.77    3.41 
   8 -24   2  120.09    3.42 
  -8 -24  -2  124.25    3.82 
  -8  24   2  122.33    3.12 
  -8 -24   2  122.79    2.98 
   8  24   2  120.19    3.34 
   8  24  -3   -0.05    0.30 
  -8  24   3   -0.09    0.28 
  -8 -24  -3    0.56    0.46 
   8 -24   3    0.17    0.32 
   8  24   3    0.46    0.39 
  -9 -24   0    0.12    0.29 
   9  24   0   -0.74    0.32 
   9 -24   1    0.04    0.32 
   9  24  -1   -0.02    0.28 
  -9 -24  -1   -0.07    0.42 
  -9 -24   1    0.06    0.27 
   9  24   1   -0.18    0.34 
   9 -24   2    3.00    0.74 
  -9 -24  -2    2.86    0.83 
   9  24  -2    2.17    0.72 
   9  24   2    2.98    0.63 
   9  24  -3    0.45    0.37 
   9 -24   3    0.54    0.46 
  -9 -24  -3    0.40    0.45 
   9  24   3   -0.18    0.41 
   9 -24  -3    0.26    0.35 
 -10 -24   0    4.63    0.74 
  10  24   0    7.85    1.13 
 -10 -24  -1    0.07    0.41 
  10  24  -1    0.12    0.36 
  10  24   1    0.40    0.46 
  10 -24  -1    0.46    0.35 
  10  24  -2    2.57    0.63 
 -10 -24  -2    3.40    0.75 
  10 -24   2    3.73    0.72 
  10 -24  -2    3.63    0.65 
  10  24   2    3.44    0.73 
   0  25   0    2.22    0.56 
   0 -25   0    4.19    0.81 
   0 -25  -1   29.81    1.51 
   0 -25   1   31.59    1.64 
   0  25  -1   31.19    1.51 
   0  25   1   31.09    1.62 
   0  25  -2   -0.06    0.44 
   0 -25  -2    0.03    0.41 
   0  25   2    0.21    0.44 
   0 -25   2   -0.05    0.31 
   0 -25   3   25.66    2.09 
   0  25  -3   23.85    1.35 
   0 -25  -3   23.12    1.64 
   0  25   3   22.37    1.62 
   0 -25  -4    0.42    0.51 
   0 -25   4   -0.15    0.46 
   0  25   4    0.04    0.36 
   0 -25   5   11.38    1.82 
   0  25   5    8.25    1.29 
   0 -25  -5   12.21    1.35 
  -1  25   0   -0.15    0.25 
   1 -25   0    0.21    0.33 
   1  25   0   -0.26    0.26 
  -1 -25   0   -0.10    0.28 
   1 -25   1    1.22    0.57 
  -1  25   1    1.10    0.72 
  -1 -25  -1    1.98    0.61 
   1  25  -1    0.85    0.43 
  -1  25  -1    0.40    0.44 
   1  25   1    0.47    0.39 
  -1 -25   1    2.01    0.56 
   1 -25  -1    0.78    0.45 
  -1  25   2    3.91    0.77 
   1  25  -2    4.08    0.71 
   1 -25   2    6.15    1.11 
  -1 -25  -2    3.25    0.82 
  -1  25  -2    4.98    0.79 
   1 -25  -2    2.99    0.74 
   1  25   2    3.58    0.74 
  -1 -25   2    3.29    0.81 
  -1  25   3    0.73    0.51 
   1 -25   3    1.32    0.83 
  -1 -25  -3    1.78    0.75 
   1  25  -3    1.21    0.50 
   1  25   3    1.57    0.63 
   1 -25  -3    0.70    0.45 
  -1 -25   3    0.82    0.65 
  -1  25   4    4.69    0.92 
  -1 -25  -4    6.58    1.15 
   1 -25   4    8.12    1.56 
  -1 -25   4    4.52    1.15 
   1 -25  -4    5.65    0.97 
   1  25   4    5.11    1.02 
  -1 -25  -5    2.19    0.74 
  -1  25   5    1.96    0.75 
   1 -25   5    1.71    0.92 
   1 -25  -5    0.98    0.67 
   1  25   5    0.97    0.72 
   2  25   0   14.49    1.19 
  -2 -25   0   13.51    1.07 
  -2  25   0   14.51    1.22 
   2 -25   0   13.58    1.11 
  -2 -25  -1    0.62    0.44 
   2 -25   1    1.03    0.57 
   2  25  -1    0.67    0.47 
  -2  25   1    0.77    0.45 
   2  25   1    0.58    0.40 
   2 -25  -1    0.94    0.49 
  -2 -25   1    1.41    0.53 
  -2  25  -1    0.71    0.40 
   2 -25   2    8.42    1.26 
  -2 -25  -2    7.88    1.12 
  -2  25   2    8.74    1.14 
   2  25  -2    8.40    1.06 
   2  25   2    7.35    1.00 
   2 -25  -2    9.27    0.94 
  -2 -25   2   10.84    1.10 
  -2  25  -2    8.95    0.89 
  -2  25   3    0.36    0.37 
  -2 -25  -3    0.11    0.51 
   2 -25   3    0.11    0.44 
   2  25  -3    0.42    0.38 
   2 -25  -3    0.49    0.43 
   2  25   3    0.51    0.45 
  -2 -25   3    1.18    0.57 
  -2 -25  -4    3.22    1.02 
  -2  25   4    2.82    0.92 
   2 -25   4    3.33    1.16 
   2 -25  -4    2.51    0.63 
  -2 -25   4    1.92    1.00 
   2  25   4    4.40    0.93 
   2 -25   5    0.18    0.61 
  -2 -25  -5    0.05    0.54 
  -2  25   5   -0.02    0.53 
  -2 -25   5    0.12    0.80 
   2  25   5   -0.79    0.51 
  -3 -25   0    0.46    0.30 
  -3  25   0   -0.44    0.23 
   3 -25   0   -0.23    0.26 
   3  25   0    0.40    0.41 
  -3  25   1   -0.12    0.32 
   3 -25   1   -0.07    0.35 
   3  25  -1    0.15    0.32 
  -3 -25  -1    0.04    0.29 
  -3  25  -1   -0.41    0.29 
  -3 -25   1   -0.06    0.24 
   3  25   1    0.11    0.33 
   3 -25  -1    0.03    0.29 
   3 -25   2    0.46    0.50 
  -3  25   2    0.03    0.36 
   3  25  -2    0.16    0.39 
  -3 -25  -2   -0.20    0.36 
   3 -25  -2    0.45    0.41 
  -3  25  -2    0.14    0.34 
  -3 -25   2    0.85    0.44 
   3  25   2    0.24    0.42 
  -3 -25  -3    2.83    0.92 
  -3  25   3    0.79    0.54 
   3 -25   3    1.47    0.75 
   3  25  -3    1.61    0.63 
   3 -25  -3    2.75    0.57 
  -3 -25   3    1.99    0.61 
   3  25   3    1.07    0.50 
  -3 -25  -4    3.07    0.93 
   3  25  -4    2.09    0.70 
   3 -25   4    1.59    0.74 
  -3  25   4    1.34    0.61 
  -3 -25   4    2.25    1.03 
   3  25   4    1.89    0.69 
   3 -25   5    2.50    0.98 
  -3 -25  -5    4.80    0.93 
  -3  25   5    3.31    0.80 
   3  25   5    5.47    1.08 
  -3 -25   5    6.18    1.61 
   4  25   0   11.77    1.20 
   4 -25   0    9.33    0.99 
  -4  25   0   11.25    1.09 
  -4 -25   0    9.13    0.89 
   4  25  -1   32.36    1.82 
  -4  25   1   31.10    1.71 
   4 -25   1   35.12    2.00 
  -4 -25  -1   34.46    1.87 
  -4 -25   1   31.77    1.62 
   4  25   1   33.82    1.80 
  -4  25  -1   33.03    1.58 
   4 -25  -1   33.81    1.60 
  -4  25   2    9.47    1.22 
  -4 -25  -2   10.43    1.49 
   4 -25   2    9.38    1.57 
   4  25  -2    9.43    0.96 
   4 -25  -2    9.86    0.93 
   4  25   2    9.01    0.99 
  -4 -25   2    8.67    0.98 
  -4 -25  -3   16.92    1.60 
  -4  25   3   19.24    1.58 
   4  25  -3   16.16    1.23 
   4 -25   3   18.74    1.69 
   4  25   3   17.78    1.34 
   4 -25  -3   17.73    1.19 
  -4 -25   3   18.59    1.45 
  -4 -25  -4    6.24    1.10 
  -4  25   4    3.53    0.79 
   4 -25   4    7.14    1.31 
   4  25  -4    6.43    0.97 
   4  25   4    5.13    0.99 
  -4 -25   4    3.53    1.38 
   5  25   0    0.39    0.41 
  -5  25   0    0.07    0.34 
   5 -25   0   -0.02    0.35 
  -5 -25   0    0.10    0.30 
   5 -25   1    0.15    0.37 
  -5  25   1   -0.40    0.28 
  -5 -25  -1    0.25    0.35 
   5  25  -1    0.16    0.34 
  -5 -25   1    0.08    0.24 
   5 -25  -1    0.12    0.29 
   5  25   1   -0.19    0.28 
  -5  25  -1    0.00    0.28 
  -5  25   2    3.98    0.84 
   5 -25   2    2.40    0.78 
   5  25  -2    3.88    0.75 
  -5 -25  -2    2.38    0.83 
   5  25   2    3.99    0.76 
  -5 -25   2    4.37    0.71 
   5 -25  -2    2.67    0.54 
  -5 -25  -3    0.34    0.58 
   5 -25   3    0.72    0.51 
   5  25  -3    0.26    0.42 
  -5  25   3    0.86    0.51 
   5  25   3    0.41    0.35 
  -5 -25   3    0.54    0.45 
  -5  25   4    8.23    1.20 
  -5 -25  -4   17.11    1.85 
   5  25  -4    8.23    1.04 
   5 -25   4   10.28    1.44 
  -5 -25   4    9.14    1.82 
   5  25   4   10.40    1.14 
  -6 -25   0    8.67    0.90 
   6  25   0    5.02    0.88 
   6 -25   0    9.18    1.12 
  -6  25   0   10.27    1.06 
   6  25  -1    3.54    0.82 
  -6  25   1    5.11    0.87 
  -6 -25  -1    4.53    0.81 
   6 -25   1    4.92    0.99 
   6 -25  -1    4.23    0.77 
   6  25   1    4.91    0.89 
  -6 -25   1    5.48    0.78 
  -6 -25  -2    5.15    1.46 
  -6  25   2    5.15    0.87 
   6  25  -2    5.59    0.93 
   6 -25   2    7.25    1.15 
   6  25   2   11.24    1.18 
   6  25  -3    1.11    0.37 
  -6  25   3    1.70    0.57 
   6 -25   3    1.90    0.72 
  -6 -25  -3    1.09    0.63 
   6  25   3    1.64    0.73 
  -6 -25   3    1.53    0.56 
  -6 -25  -4    2.59    0.71 
  -6  25   4    0.79    0.49 
   6  25  -4    2.00    0.60 
   6 -25   4    1.50    0.68 
   6  25   4    3.80    0.90 
   7 -25   0    0.06    0.47 
  -7 -25   0    0.34    0.38 
  -7  25   0   -0.16    0.27 
   7  25   0   -0.32    0.22 
  -7  25   1    1.39    0.52 
  -7 -25  -1    0.98    0.61 
   7  25  -1    0.70    0.47 
   7 -25   1    1.20    0.54 
  -7 -25   1    1.14    0.51 
   7  25   1    0.02    0.27 
   7 -25  -1    0.72    0.40 
  -7 -25  -2    0.17    0.48 
  -7  25   2    0.43    0.36 
   7  25  -2   -0.02    0.36 
   7 -25   2    0.72    0.50 
  -7 -25   2    0.13    0.28 
   7  25   2    0.07    0.36 
   7  25  -3    2.73    0.65 
  -7  25   3    2.71    0.65 
  -7 -25  -3    5.19    1.01 
   7 -25   3    3.18    0.82 
   7  25   3    2.95    0.80 
   8 -25   0   28.17    1.50 
  -8  25   0   28.69    1.43 
  -8 -25   0   28.78    1.58 
   8  25   0   27.01    1.72 
  -8 -25  -1   18.58    1.42 
  -8  25   1   16.40    1.18 
   8  25  -1   15.99    1.51 
   8 -25   1   16.01    1.24 
   8  25   1   16.21    1.25 
  -8 -25   1   17.29    1.05 
   8  25  -2   23.19    1.57 
  -8  25   2   21.24    1.34 
  -8 -25  -2   25.29    1.77 
   8 -25   2   24.52    1.59 
   8  25   2   22.56    1.46 
  -8 -25   2   25.81    1.56 
  -8  25   3   12.81    1.14 
   8 -25   3   12.02    1.28 
  -8 -25  -3   12.17    1.33 
   8  25  -3   11.12    1.09 
  -9 -25   0    0.17    0.35 
   9  25   0    0.20    0.41 
   9  25  -1    0.09    0.41 
  -9 -25  -1   -1.37    0.32 
   9 -25   1   -0.02    0.33 
   9  25   1    0.60    0.51 
  -9 -25   1   -0.29    0.20 
   9  25  -2    3.49    0.76 
   9 -25   2    2.64    0.68 
  -9 -25  -2    4.34    0.94 
   9  25   2    3.44    0.76 
  10  25   0    7.03    1.09 
 -10 -25   0    6.31    0.86 
 -10 -25  -1    4.79    0.86 
  10  25  -1    5.69    0.95 
  10 -25  -1    5.86    0.78 
  10  25   1    3.63    0.77 
   0  26   0    1.65    0.50 
   0 -26   0    2.47    0.61 
   0 -26  -1    0.09    0.28 
   0 -26   1    0.17    0.32 
   0  26   1    0.00    0.30 
   0  26  -1    0.07    0.32 
   0 -26  -2    4.20    0.88 
   0  26   2    2.07    0.58 
   0 -26   2    2.21    0.58 
   0  26  -2    2.38    0.54 
   0 -26  -3   -0.01    0.44 
   0  26   3   -0.13    0.33 
   0 -26   3   -0.35    0.34 
   0  26  -3   -0.04    0.31 
   0 -26  -4    3.76    0.77 
   0  26   4    3.39    0.77 
   1  26   0    0.20    0.31 
   1 -26   0    0.23    0.29 
  -1  26   0    0.12    0.29 
  -1 -26   0   -0.07    0.30 
   1 -26   1    0.07    0.35 
  -1 -26  -1   -0.19    0.27 
  -1  26   1    0.00    0.32 
   1  26  -1    0.27    0.41 
   1  26   1    0.37    0.35 
   1 -26  -1    0.30    0.34 
  -1 -26   1   -0.07    0.20 
  -1  26  -1   -0.14    0.27 
   1  26  -2    0.42    0.36 
  -1 -26  -2   -0.10    0.31 
   1 -26   2   -0.04    0.31 
  -1  26   2   -0.19    0.31 
  -1 -26   2   -0.29    0.32 
   1  26   2   -0.30    0.27 
  -1  26  -2    0.29    0.38 
   1 -26  -2   -0.01    0.30 
   1  26  -3    1.15    0.50 
  -1  26   3    0.54    0.43 
  -1 -26   3    1.32    0.61 
   1  26   3    1.34    0.41 
   1 -26  -3    0.53    0.48 
  -1 -26  -4    0.50    0.50 
  -1  26   4   -0.99    0.45 
   1 -26   4    0.11    0.54 
   1  26   4   -0.22    0.34 
  -1 -26   4   -0.22    0.51 
   1 -26  -4    0.16    0.43 
   2 -26   0    0.80    0.44 
  -2 -26   0    0.88    0.53 
  -2  26   0    0.94    0.47 
   2  26   0    0.37    0.37 
   2  26  -1   11.33    1.07 
   2 -26   1   12.67    1.16 
  -2  26   1   10.81    1.01 
  -2 -26  -1   13.42    1.20 
  -2 -26   1   13.58    1.11 
   2  26   1   12.63    1.13 
  -2  26  -1   12.69    1.09 
   2 -26  -1   13.88    1.14 
  -2 -26  -2    0.16    0.41 
   2  26  -2    0.48    0.39 
  -2  26   2    0.09    0.35 
   2 -26   2    0.31    0.47 
  -2 -26   2   -0.09    0.28 
  -2  26  -2   -0.08    0.26 
   2  26   2    0.24    0.31 
   2 -26  -2    0.22    0.42 
   2  26  -3    7.67    0.96 
   2 -26   3    9.83    1.54 
  -2 -26  -3    6.73    1.21 
  -2  26   3    6.39    1.01 
   2 -26  -3    7.91    0.89 
   2  26   3    9.38    1.22 
  -2 -26   3    6.73    1.13 
  -2 -26  -4    0.04    0.56 
   2 -26   4   -1.49    0.51 
  -2  26   4   -0.24    0.41 
  -2 -26   4   -0.93    0.51 
   2 -26  -4   -0.03    0.35 
   2  26   4   -0.28    0.27 
   3 -26   0    0.05    0.33 
   3  26   0   -0.03    0.30 
  -3 -26   0   -0.13    0.24 
  -3  26   0    0.13    0.35 
  -3 -26  -1   -0.12    0.27 
   3  26  -1    0.28    0.39 
   3 -26   1   -0.14    0.34 
  -3  26   1   -0.16    0.27 
   3 -26  -1    0.13    0.30 
   3  26   1   -0.10    0.29 
  -3 -26   1    0.04    0.26 
  -3  26  -1   -0.02    0.28 
  -3  26   2    0.47    0.41 
   3  26  -2    0.28    0.41 
  -3 -26  -2    0.37    0.43 
   3 -26   2    0.13    0.38 
  -3 -26   2   -0.27    0.21 
   3 -26  -2    0.14    0.35 
   3  26   2    0.31    0.32 
   3 -26   3    1.05    0.59 
  -3  26   3    0.55    0.43 
   3  26  -3    1.49    0.61 
  -3 -26  -3    0.58    0.65 
   3  26   3    0.48    0.38 
   3 -26  -3    1.64    0.47 
  -3 -26   3    1.46    0.53 
  -3  26   4   -0.08    0.42 
  -3 -26  -4    0.33    0.68 
   3 -26   4   -0.83    0.36 
  -3 -26   4    0.06    0.64 
   3  26   4    0.67    0.49 
   4  26   0    2.58    0.63 
  -4  26   0    3.05    0.66 
   4 -26   0    2.75    0.56 
  -4 -26   0    2.32    0.58 
  -4  26   1    0.49    0.42 
   4 -26   1    0.35    0.45 
  -4 -26  -1    0.04    0.28 
   4  26  -1   -0.06    0.31 
   4 -26  -1    0.59    0.48 
   4  26   1    0.19    0.25 
  -4  26  -1    1.28    0.48 
  -4 -26   1    0.03    0.26 
  -4 -26  -2    2.78    0.82 
   4 -26   2    2.54    0.88 
   4  26  -2    2.02    0.60 
  -4  26   2    2.85    0.71 
   4  26   2    1.92    0.58 
   4 -26  -2    1.89    0.51 
  -4 -26   2    2.63    0.65 
  -4  26   3    0.72    0.52 
  -4 -26  -3   -0.46    0.46 
   4  26  -3    0.08    0.44 
   4 -26   3   -0.52    0.43 
   4  26   3   -0.13    0.35 
   4 -26  -3    0.03    0.32 
  -4 -26   3    0.14    0.33 
  -4  26   4    1.19    0.57 
   4 -26   4    0.25    0.48 
  -4 -26  -4    0.86    0.69 
   4  26  -4    1.12    0.57 
  -4 -26   4    1.37    0.83 
   4  26   4    1.12    0.54 
   5 -26   0    0.35    0.35 
  -5  26   0    0.19    0.36 
  -5 -26   0    0.29    0.32 
   5  26   0   -0.21    0.24 
  -5 -26  -1   -0.42    0.25 
   5 -26   1   -0.29    0.30 
  -5  26   1    0.27    0.38 
   5  26  -1    0.61    0.39 
  -5  26  -1    0.05    0.28 
  -5 -26   1    0.22    0.28 
   5 -26  -1    0.05    0.36 
   5  26   1    0.08    0.29 
   5 -26   2    0.02    0.43 
   5  26  -2    0.37    0.54 
  -5  26   2   -0.39    0.34 
  -5 -26  -2    0.13    0.44 
   5  26   2   -0.45    0.25 
  -5 -26   2   -0.13    0.22 
   5 -26  -2    0.14    0.24 
  -5  26   3   -0.42    0.30 
   5  26  -3   -0.32    0.33 
   5 -26   3    0.13    0.39 
  -5 -26  -3    0.08    0.51 
  -5 -26   3    0.53    0.45 
   5  26   3    0.25    0.32 
   5  26  -4    0.42    0.49 
   5 -26   4    0.14    0.54 
  -5  26   4   -0.04    0.47 
  -5 -26  -4    0.15    0.57 
  -5 -26   4    0.13    0.86 
   5  26   4   -0.85    0.52 
  -6 -26   0    1.93    0.55 
  -6  26   0    1.78    0.58 
   6 -26   0    2.83    0.71 
   6  26   0    0.67    0.45 
   6  26  -1    3.45    0.81 
  -6 -26  -1    3.10    0.68 
   6 -26   1    5.55    1.01 
  -6  26   1    4.40    0.81 
   6 -26  -1    5.10    0.71 
  -6 -26   1    4.18    0.61 
   6  26   1    4.41    0.82 
  -6 -26  -2    2.95    0.85 
   6  26  -2    3.02    0.72 
   6 -26   2    2.82    0.83 
  -6  26   2    2.97    0.69 
  -6 -26   2    3.03    0.60 
   6  26   2    3.65    0.64 
  -6 -26  -3    5.07    1.03 
   6  26  -3    4.86    0.87 
  -6  26   3    3.43    0.73 
   6 -26   3    3.81    1.01 
  -6 -26   3    4.73    0.76 
   6  26   3    4.97    0.88 
   7 -26   0    0.07    0.38 
  -7  26   0   -0.35    0.25 
  -7 -26   0   -0.13    0.30 
   7  26   0   -0.04    0.34 
  -7 -26  -1    0.07    0.35 
   7 -26   1    0.18    0.40 
  -7  26   1   -0.10    0.40 
   7  26  -1    0.62    0.49 
   7  26   1    0.04    0.32 
  -7 -26   1    0.27    0.25 
   7 -26  -1    0.38    0.41 
  -7 -26  -2    0.13    0.43 
   7  26  -2    0.37    0.50 
  -7  26   2    0.31    0.38 
   7 -26   2   -0.24    0.37 
  -7 -26   2    0.05    0.20 
   7 -26   3    0.31    0.50 
  -7  26   3    0.61    0.47 
   7  26  -3    0.76    0.50 
  -7 -26  -3    0.49    0.49 
   7  26   3    0.69    0.46 
   8  26   0   -0.14    0.31 
  -8  26   0    0.28    0.40 
  -8 -26   0    0.24    0.30 
   8 -26   0    0.33    0.38 
  -8  26   1    0.30    0.32 
   8 -26   1    0.70    0.50 
  -8 -26  -1    0.12    0.32 
   8  26  -1    0.30    0.40 
  -8 -26   1    0.82    0.44 
   8  26   1    0.31    0.33 
  -8  26   2    0.12    0.33 
   8  26  -2    0.34    0.44 
  -8 -26  -2    1.37    0.56 
   8 -26   2    0.20    0.41 
  -8 -26   2   -0.06    0.51 
   8  26   2    0.21    0.32 
  -9 -26   0   -0.12    0.26 
   9  26   0    0.62    0.45 
   9 -26   1    0.20    0.40 
   9  26  -1    0.30    0.44 
  -9 -26  -1   -0.19    0.32 
   9  26   1   -0.43    0.34 
  -9 -26   1    0.25    0.34 
   0  27   0    0.23    0.31 
   0 -27   0    0.05    0.28 
   0 -27  -1    0.14    0.48 
   0  27  -1    0.20    0.29 
   0  27   1    0.36    0.35 
   0 -27   1   -0.05    0.29 
   0  27   2    0.41    0.40 
   0 -27   2    0.08    0.31 
   0  27  -2    0.24    0.35 
   0 -27  -2    0.21    0.37 
   0  27   3    0.19    0.39 
   0 -27   3    0.46    0.45 
   0 -27  -3    0.71    0.47 
   0 -27  -4    0.83    0.52 
   0  27   4    0.22    0.43 
   0 -27   4    1.25    0.63 
   1 -27   0   -0.13    0.22 
  -1 -27   0    0.16    0.34 
   1  27   0    0.00    0.28 
  -1  27   0   -0.33    0.22 
   1 -27   1   -0.17    0.26 
  -1  27   1    0.26    0.34 
  -1 -27  -1    0.12    0.35 
   1  27  -1   -0.25    0.27 
   1  27   1   -0.03    0.28 
  -1 -27   1   -0.08    0.25 
   1 -27  -1   -0.19    0.29 
  -1  27  -1   -0.09    0.27 
   1 -27   2    5.45    0.87 
  -1 -27  -2    4.67    0.87 
  -1  27   2    4.12    0.79 
   1  27  -2    4.51    0.75 
   1 -27  -2    5.64    0.80 
  -1 -27   2    3.94    0.69 
  -1  27  -2    6.65    0.94 
   1  27   2    4.80    0.93 
  -1 -27  -3    0.35    0.45 
   1  27  -3    1.03    0.49 
   1 -27   3    1.76    0.66 
  -1  27   3    0.49    0.41 
   1 -27  -3    1.46    0.57 
   1  27   3    0.83    0.44 
  -1 -27   3    1.88    0.62 
  -1 -27  -4   10.23    1.11 
   1 -27   4   12.09    1.85 
  -1  27   4   10.50    1.38 
  -1 -27   4    7.77    1.49 
   1 -27  -4   10.45    1.05 
   1  27   4    9.48    1.30 
   2  27   0   82.43    2.65 
   2 -27   0   82.98    2.58 
  -2 -27   0   83.28    2.69 
  -2  27   0   83.88    2.64 
  -2 -27  -1    2.93    0.69 
   2  27  -1    1.22    0.49 
  -2  27   1    1.42    0.50 
   2 -27   1    1.37    0.47 
  -2  27  -1    2.53    0.58 
   2 -27  -1    1.63    0.48 
   2  27   1    1.47    0.49 
  -2 -27   1    2.27    0.53 
   2 -27   2   60.57    2.53 
   2  27  -2   63.24    2.28 
  -2 -27  -2   64.37    2.62 
  -2  27   2   64.19    2.44 
   2  27   2   62.98    2.36 
  -2 -27   2   62.37    2.28 
   2 -27  -2   62.52    2.14 
  -2  27  -2   63.64    2.02 
   2 -27   3    0.95    0.59 
  -2 -27  -3    1.15    0.57 
  -2  27   3    0.89    0.49 
   2  27  -3    1.06    0.43 
   2 -27  -3    1.83    0.53 
   2  27   3    1.00    0.59 
  -2 -27   3    0.80    0.49 
  -2 -27  -4   33.18    2.18 
   2 -27   4   33.29    2.62 
  -2  27   4   30.45    1.97 
   2 -27  -4   33.32    1.63 
  -2 -27   4   29.11    2.28 
   2  27   4   30.44    1.86 
  -3 -27   0    0.18    0.28 
  -3  27   0   -0.58    0.30 
   3 -27   0   -0.11    0.29 
   3  27   0    0.00    0.30 
   3  27  -1   -0.29    0.28 
   3 -27   1   -0.52    0.31 
  -3  27   1    0.02    0.31 
  -3 -27  -1    0.11    0.32 
   3  27   1   -0.27    0.29 
   3 -27  -1   -0.15    0.25 
  -3  27  -1   -0.19    0.34 
  -3 -27   1    0.20    0.23 
   3  27  -2    4.47    0.81 
   3 -27   2    5.42    0.98 
  -3  27   2    3.60    0.74 
  -3 -27  -2    3.78    0.81 
  -3 -27   2    4.84    0.79 
   3  27   2    3.92    0.78 
   3 -27  -2    3.76    0.64 
  -3  27   3    0.79    0.48 
   3 -27   3   -0.10    0.43 
  -3 -27  -3    0.13    0.54 
   3  27  -3    0.71    0.45 
  -3 -27   3    0.31    0.40 
   3 -27  -3    0.78    0.43 
   3  27   3   -0.11    0.51 
  -3  27   4   11.87    1.28 
  -3 -27  -4   13.34    1.78 
   3 -27   4   13.60    1.86 
  -3 -27   4   12.00    1.70 
   3  27   4   11.70    1.22 
   4  27   0    0.18    0.36 
   4 -27   0    0.13    0.37 
  -4 -27   0   -0.10    0.31 
  -4  27   0    0.16    0.37 
   4  27  -1   -0.03    0.34 
  -4 -27  -1   -0.25    0.28 
  -4  27   1   -0.09    0.31 
   4 -27   1   -0.19    0.29 
   4 -27  -1    0.22    0.32 
  -4 -27   1    0.24    0.28 
   4  27   1    0.21    0.30 
  -4  27  -1    0.35    0.33 
  -4  27   2    0.13    0.45 
   4  27  -2    0.41    0.40 
   4 -27   2   -0.08    0.44 
  -4 -27  -2   -0.14    0.38 
   4  27   2   -0.85    0.35 
  -4 -27   2    0.28    0.27 
   4 -27  -2    0.10    0.28 
  -4 -27  -3   -0.37    0.45 
   4 -27   3    0.24    0.56 
   4  27  -3    0.06    0.33 
  -4  27   3    0.07    0.40 
   4  27   3    0.24    0.34 
   4 -27  -3    0.28    0.31 
  -4 -27   3    0.36    0.37 
  -4 -27  -4    0.22    0.54 
   4  27  -4    0.17    0.45 
   4 -27   4    0.26    0.46 
  -4  27   4    0.20    0.42 
   4  27   4    0.06    0.44 
  -4 -27   4    0.85    0.71 
   5 -27   0    0.15    0.31 
  -5 -27   0   -0.22    0.23 
   5  27   0    0.51    0.40 
  -5  27   0   -0.06    0.34 
  -5  27   1    0.45    0.39 
   5 -27   1    0.21    0.38 
  -5 -27  -1   -0.10    0.25 
   5  27  -1    0.23    0.41 
   5  27   1    0.15    0.36 
   5 -27  -1    0.51    0.38 
  -5  27  -1    0.38    0.37 
  -5 -27   1    0.81    0.38 
  -5  27   2    3.23    0.74 
   5 -27   2    2.19    0.72 
  -5 -27  -2    2.33    0.73 
   5  27  -2    2.91    0.65 
   5  27   2    4.17    0.73 
   5 -27  -2    3.35    0.59 
  -5 -27   2    3.22    0.58 
  -5  27   3    3.01    0.79 
   5  27  -3    2.62    0.69 
  -5 -27  -3    3.08    0.99 
   5 -27   3    1.74    0.71 
  -5 -27   3    2.97    0.71 
   5  27   3    3.86    0.82 
   6 -27   0   59.72    2.14 
   6  27   0   58.14    2.39 
  -6  27   0   57.64    2.14 
  -6 -27   0   58.35    2.09 
   6  27  -1   12.60    1.30 
  -6  27   1    9.65    1.01 
   6 -27   1   13.04    1.27 
  -6 -27  -1   10.97    1.10 
  -6 -27   1   11.39    0.99 
   6  27   1   14.42    1.28 
   6 -27  -1   11.60    1.04 
   6  27  -2   42.81    2.12 
   6 -27   2   42.39    2.33 
  -6  27   2   41.94    2.04 
  -6 -27  -2   41.00    2.35 
  -6 -27   2   43.22    1.67 
   6  27   2   43.46    1.93 
   6 -27   3    6.72    1.19 
   6  27  -3    7.76    1.12 
  -6 -27  -3    7.42    1.31 
  -6  27   3    7.91    1.12 
   6  27   3    8.60    1.11 
  -6 -27   3   10.71    1.35 
   7  27   0    0.48    0.45 
   7 -27   0   -0.21    0.36 
  -7 -27   0   -0.15    0.25 
  -7  27   0   -0.49    0.27 
  -7  27   1    0.18    0.37 
   7  27  -1   -0.04    0.42 
  -7 -27  -1   -0.72    0.33 
   7 -27   1    0.12    0.36 
  -7 -27   1    0.35    0.28 
   7 -27  -1    0.18    0.35 
   7  27   1   -0.28    0.34 
   7  27  -2    2.10    0.64 
   7 -27   2    1.45    0.63 
  -7 -27  -2    2.38    0.74 
  -7  27   2    2.48    0.71 
  -7 -27   2    3.83    0.63 
   7  27   2    3.66    0.79 
   8 -27   0    0.03    0.32 
  -8 -27   0   -0.91    0.25 
   8  27   0    0.06    0.36 
  -8 -27  -1    0.27    0.38 
   8 -27   1    0.49    0.49 
   8  27  -1    0.12    0.43 
  -8  27   1    0.08    0.32 
   8  27   1   -0.33    0.29 
  -8 -27   1    0.30    0.29 
  -8  27   2    0.12    0.30 
   8 -27   2   -0.13    0.37 
  -8 -27  -2    0.51    0.52 
   8  27  -2    0.27    0.44 
   8  27   2   -0.14    0.33 
  -9 -27   0   -0.03    0.36 
   9  27   0   -0.21    0.41 
   0 -28   0    0.90    0.41 
   0  28   0    1.29    0.46 
   0  28  -1    0.22    0.31 
   0  28   1    0.12    0.32 
   0 -28  -1   -0.45    0.19 
   0 -28   1   -0.10    0.30 
   0 -28  -2    0.02    0.34 
   0  28   2    0.18    0.34 
   0  28  -2    0.37    0.33 
   0 -28   2    0.27    0.37 
   0  28   3    0.22    0.36 
   0 -28  -3   -0.23    0.38 
   0 -28   3   -0.14    0.34 
   0 -28  -4    1.20    0.62 
   0 -28   4    2.04    0.81 
   0  28   4    0.47    0.46 
   1  28   0    0.30    0.34 
  -1 -28   0    0.19    0.28 
  -1  28   0   -0.04    0.29 
   1 -28   0   -0.17    0.25 
   1  28  -1    1.14    0.51 
  -1 -28  -1    0.83    0.46 
   1 -28   1    1.13    0.50 
  -1  28   1    1.14    0.48 
  -1  28  -1    0.71    0.45 
   1  28   1    1.18    0.49 
  -1 -28   1    0.98    0.41 
   1 -28  -1    1.52    0.46 
   1 -28   2    0.21    0.37 
  -1  28   2    0.92    0.48 
   1  28  -2    0.46    0.42 
  -1 -28  -2    0.20    0.37 
   1  28   2    0.83    0.61 
  -1  28  -2    0.99    0.44 
   1 -28  -2    0.52    0.31 
  -1 -28   2    0.92    0.52 
   1  28  -3   12.41    1.03 
  -1 -28  -3   13.65    1.27 
   1 -28   3   14.41    1.33 
  -1  28   3   12.15    1.11 
   1  28   3   13.39    1.23 
  -1 -28   3   13.48    1.26 
   1 -28  -3   13.07    1.18 
  -1  28   4    3.02    0.76 
  -1 -28  -4    2.39    0.66 
   1 -28   4    3.85    1.03 
  -1 -28   4    3.69    1.02 
   1  28   4    2.14    0.64 
   1 -28  -4    4.04    0.82 
   2 -28   0    0.33    0.41 
   2  28   0   -0.01    0.31 
  -2 -28   0    0.20    0.32 
  -2  28   0    0.15    0.38 
  -2 -28  -1  206.79    4.24 
   2 -28   1  208.42    4.26 
   2  28  -1  203.25    4.26 
  -2  28   1  202.61    4.21 
   2  28   1  203.85    4.38 
  -2  28  -1  202.91    3.84 
   2 -28  -1  204.13    3.99 
  -2 -28   1  201.02    4.00 
  -2 -28  -2   -0.09    0.38 
  -2  28   2   -0.14    0.27 
   2 -28   2    0.25    0.38 
   2  28  -2   -0.61    0.24 
  -2 -28   2   -0.22    0.27 
   2 -28  -2   -0.39    0.28 
   2  28   2   -0.15    0.31 
  -2  28  -2   -0.38    0.29 
   2 -28   3  131.92    4.14 
  -2  28   3  133.51    3.55 
  -2 -28  -3  135.13    3.80 
   2  28  -3  135.95    3.19 
   2  28   3  138.92    3.43 
   2 -28  -3  138.34    3.08 
  -2 -28   3  136.97    3.64 
  -2 -28  -4   -0.39    0.49 
  -2  28   4   -0.09    0.34 
   2 -28   4    0.13    0.69 
   2  28   4   -0.11    0.36 
  -2 -28   4    0.91    0.67 
   2 -28  -4   -0.20    0.27 
   3  28   0   -0.02    0.40 
  -3  28   0    0.21    0.33 
   3 -28   0   -0.13    0.31 
  -3 -28   0    0.43    0.32 
  -3 -28  -1    1.38    0.53 
   3  28  -1    2.97    0.64 
  -3  28   1    2.96    0.66 
   3 -28   1    2.65    0.66 
   3 -28  -1    2.10    0.52 
   3  28   1    1.55    0.51 
  -3 -28   1    3.31    0.67 
  -3  28  -1    2.88    0.62 
  -3 -28  -2    0.11    0.45 
   3  28  -2    1.17    0.51 
   3 -28   2    0.63    0.54 
  -3  28   2    1.00    0.53 
  -3 -28   2    0.18    0.30 
   3 -28  -2    0.95    0.44 
   3  28   2    0.56    0.36 
  -3 -28  -3    7.97    1.35 
  -3  28   3    5.23    0.85 
   3  28  -3    6.95    0.97 
   3 -28   3    6.84    1.16 
   3  28   3    8.26    1.03 
  -3 -28   3   11.73    0.96 
   3 -28  -3    7.22    0.77 
  -3  28   4    1.64    0.62 
   3 -28   4    0.97    0.76 
  -3 -28  -4    0.91    0.63 
  -3 -28   4    1.47    0.73 
   3  28   4    1.13    0.58 
  -4 -28   0    0.20    0.25 
   4  28   0    0.49    0.38 
   4 -28   0    0.91    0.44 
  -4  28   0    0.86    0.42 
   4 -28   1    0.35    0.39 
  -4 -28  -1    0.57    0.41 
   4  28  -1    1.04    0.48 
  -4  28   1    0.00    0.33 
   4  28   1    1.08    0.47 
  -4  28  -1    0.80    0.38 
  -4 -28   1    1.06    0.37 
   4 -28  -1    0.41    0.35 
   4  28  -2    0.57    0.44 
   4 -28   2    0.83    0.53 
  -4  28   2    0.31    0.38 
  -4 -28  -2   -0.08    0.37 
  -4 -28   2    0.18    0.26 
   4 -28  -2    0.52    0.31 
   4  28   2    0.53    0.46 
   4 -28   3    1.20    0.71 
   4  28  -3    0.45    0.42 
  -4 -28  -3    0.57    0.64 
  -4  28   3    0.69    0.54 
   4 -28  -3   -0.14    0.40 
   4  28   3    0.02    0.34 
  -4 -28   3    1.16    0.46 
   5 -28   0   -0.37    0.27 
  -5 -28   0    0.33    0.27 
   5  28   0   -0.12    0.31 
  -5  28   0   -0.16    0.23 
  -5  28   1    2.50    0.66 
  -5 -28  -1    2.62    0.65 
   5 -28   1    1.78    0.57 
   5  28  -1    1.04    0.50 
   5  28   1    1.56    0.54 
  -5 -28   1    2.61    0.53 
   5 -28  -1    1.38    0.39 
  -5  28   2    0.67    0.49 
  -5 -28  -2    1.49    0.58 
   5 -28   2    0.71    0.53 
   5  28  -2    0.93    0.44 
  -5 -28   2    0.64    0.41 
   5 -28  -2    0.57    0.31 
   5  28   2   -0.11    0.41 
  -5  28   3    9.47    1.26 
  -5 -28  -3    9.67    1.46 
   5  28  -3   10.46    1.29 
   5 -28   3    8.60    1.31 
   5  28   3    9.30    1.00 
  -5 -28   3    8.64    0.82 
   6 -28   0    0.41    0.36 
   6  28   0   -0.01    0.32 
  -6  28   0   -0.07    0.32 
  -6 -28   0   -0.22    0.31 
   6 -28   1  120.08    3.30 
   6  28  -1  124.37    3.44 
  -6 -28  -1  124.78    3.21 
  -6  28   1  127.41    3.18 
  -6 -28   1  126.16    2.88 
   6 -28  -1  126.52    2.70 
   6  28   1  128.51    3.30 
  -6 -28  -2    0.77    0.50 
   6  28  -2    0.69    0.52 
   6 -28   2   -0.21    0.38 
  -6  28   2    0.04    0.32 
  -6 -28   2    0.52    0.34 
   6  28   2    0.01    0.40 
   6  28  -3   84.12    2.84 
  -6  28   3   83.62    2.88 
   6 -28   3   86.42    3.23 
  -6 -28  -3   87.06    3.40 
  -6 -28   3   82.37    2.46 
   6  28   3   84.65    2.63 
   7 -28   0   -0.08    0.27 
  -7  28   0   -0.12    0.30 
  -7 -28   0    0.33    0.30 
   7  28   0    0.05    0.36 
  -7 -28  -1    0.09    0.35 
  -7  28   1    0.16    0.33 
   7 -28   1    0.34    0.42 
   7  28  -1    0.04    0.39 
  -7 -28   1   -0.10    0.27 
   7  28   1    0.56    0.43 
  -7  28   2   -0.05    0.37 
   7  28  -2    0.60    0.49 
   7 -28   2    0.13    0.45 
  -7 -28  -2    0.34    0.42 
   7  28   2    0.22    0.42 
  -7 -28   2    0.41    0.31 
   8  28   0    1.44    0.60 
   8 -28   0    0.57    0.41 
  -8 -28   0    0.84    0.45 
  -8 -28  -1    2.11    0.61 
   8  28  -1    2.53    0.69 
  -8  28   1    2.29    0.62 
   8 -28   1    4.26    0.83 
  -8 -28   1    2.58    0.53 
   8  28   1    3.13    0.73 
   0 -29   0    0.14    0.30 
   0  29   0    0.78    0.41 
   0  29   1    9.27    1.03 
   0 -29   1    7.64    1.00 
   0  29  -1    9.74    0.98 
   0 -29  -1    9.08    1.16 
   0  29  -2   -0.10    0.26 
   0 -29   2    0.20    0.27 
   0  29   2    0.18    0.35 
   0 -29  -2    0.05    0.38 
   0 -29  -3    4.77    0.82 
   0 -29   3    3.88    0.82 
   0  29   3    4.80    0.85 
   1 -29   0   -0.19    0.23 
  -1 -29   0    0.06    0.29 
  -1  29   0   -0.04    0.30 
   1  29   0    0.17    0.35 
   1 -29   1    0.00    0.28 
  -1 -29  -1    0.21    0.41 
   1  29  -1   -0.09    0.28 
  -1  29   1    0.49    0.39 
  -1 -29   1    0.26    0.29 
   1  29   1   -0.05    0.23 
  -1  29  -1    0.33    0.31 
   1 -29  -1    0.14    0.31 
   1 -29   2    0.07    0.25 
  -1 -29  -2    0.61    0.45 
   1  29  -2    0.64    0.36 
  -1  29   2    0.37    0.40 
   1 -29  -2    0.32    0.50 
  -1 -29   2    0.74    0.43 
  -1  29  -2   -0.30    0.27 
   1  29   2    0.30    0.39 
   1 -29   3    2.36    0.77 
  -1  29   3    2.82    0.71 
  -1 -29  -3    2.06    0.62 
  -1 -29   3    1.98    0.62 
   1 -29  -3    2.53    0.63 
   1  29   3    1.99    0.63 
  -2  29   0   31.24    1.54 
   2  29   0   29.99    1.57 
  -2 -29   0   30.95    1.63 
   2 -29   0   30.91    1.58 
  -2  29   1    2.44    0.64 
   2 -29   1    3.59    0.71 
   2  29  -1    2.26    0.58 
  -2 -29  -1    2.80    0.56 
  -2  29  -1    2.10    0.57 
   2  29   1    2.27    0.55 
   2 -29  -1    3.00    0.58 
  -2 -29   1    1.81    0.54 
   2  29  -2   29.44    1.53 
  -2  29   2   28.22    1.65 
  -2 -29  -2   29.33    1.60 
   2 -29   2   29.79    1.79 
   2  29   2   29.33    1.62 
   2 -29  -2   32.08    1.61 
  -2 -29   2   30.35    1.59 
  -2  29   3    0.63    0.45 
  -2 -29  -3    1.55    0.64 
   2 -29   3    2.15    0.62 
   2  29  -3    1.52    0.49 
   2 -29  -3    1.64    0.49 
  -2 -29   3    0.86    0.48 
   2  29   3    0.71    0.50 
   3 -29   0   -0.09    0.24 
  -3 -29   0   -0.10    0.20 
   3  29   0    0.13    0.31 
  -3  29   0    0.10    0.32 
  -3 -29  -1    1.28    0.55 
   3 -29   1    1.02    0.49 
   3  29  -1    1.40    0.50 
  -3  29   1    2.49    0.66 
   3  29   1    2.40    0.60 
  -3 -29   1    1.76    0.47 
   3 -29  -1    1.93    0.51 
  -3  29  -1    1.16    0.42 
  -3  29   2    0.14    0.36 
   3 -29   2    0.34    0.41 
   3  29  -2    0.46    0.39 
  -3 -29  -2    0.27    0.42 
   3  29   2    0.73    0.32 
   3 -29  -2    0.50    0.31 
   3 -29   3    2.97    0.79 
   3  29  -3    3.45    0.66 
  -3 -29  -3    2.35    0.71 
  -3  29   3    3.07    0.73 
   3 -29  -3    2.63    0.57 
  -3 -29   3    4.53    0.90 
   3  29   3    3.37    0.75 
   4 -29   0    2.34    0.55 
  -4  29   0    2.12    0.56 
   4  29   0    1.73    0.57 
  -4 -29   0    1.83    0.53 
  -4 -29  -1    6.09    0.89 
   4 -29   1    5.46    0.80 
  -4  29   1    6.15    0.90 
   4  29  -1    4.80    0.83 
  -4 -29   1    9.08    0.85 
   4  29   1    5.79    0.87 
   4 -29  -1    7.79    0.95 
  -4  29  -1    6.62    0.84 
  -4  29   2    1.56    0.50 
   4 -29   2    1.60    0.57 
   4  29  -2    1.82    0.59 
  -4 -29  -2    1.32    0.53 
   4  29   2    0.68    0.43 
   4 -29  -2    1.27    0.45 
  -4 -29   2    1.26    0.46 
   4 -29   3    2.72    0.78 
  -4 -29  -3    2.18    0.78 
  -4  29   3    3.38    0.83 
   4  29  -3    3.66    0.69 
   4  29   3    2.38    0.59 
   5 -29   0    0.20    0.23 
  -5 -29   0    0.00    0.21 
   5  29   0   -0.12    0.30 
  -5  29   0    0.09    0.31 
   5  29  -1   -0.29    0.28 
  -5  29   1    0.36    0.40 
  -5 -29  -1    0.12    0.33 
   5 -29   1   -0.10    0.31 
  -5 -29   1    0.14    0.22 
   5  29   1    0.24    0.34 
   5 -29  -1    0.25    0.36 
   5  29  -2    3.45    0.85 
  -5  29   2    3.28    0.79 
   5 -29   2    3.61    0.80 
  -5 -29  -2    1.97    0.56 
  -5 -29   2    2.02    0.56 
   5  29   2    1.99    0.58 
   5 -29  -2    3.17    0.61 
  -6  29   0   24.31    1.38 
   6  29   0   25.78    1.59 
  -6 -29   0   22.40    1.29 
   6 -29   0   25.31    1.34 
   6  29  -1   15.97    1.28 
  -6 -29  -1   16.13    1.29 
   6 -29   1   16.25    1.28 
  -6  29   1   15.54    1.21 
   6 -29  -1   16.75    1.14 
  -6 -29   1   14.63    1.06 
   6  29   1   18.43    1.37 
   6 -29   2   16.42    1.35 
  -6  29   2   17.33    1.29 
  -6 -29  -2   18.74    1.46 
   6  29  -2   17.73    1.30 
  -6 -29   2   15.45    1.11 
   6  29   2   16.80    1.26 
  -7  29   0   -0.06    0.29 
   7 -29   0    0.01    0.32 
  -7 -29   0   -0.03    0.34 
   7  29   0   -0.23    0.29 
  -7  29   1    0.86    0.52 
   7 -29   1    0.00    0.38 
  -7 -29  -1    0.71    0.51 
   7  29  -1    0.49    0.45 
   7  29   1    0.27    0.39 
   0 -30   0   13.50    0.98 
   0  30   0   14.65    1.13 
   0 -30  -1    0.38    0.39 
   0 -30   1    0.43    0.37 
   0  30  -1    0.48    0.37 
   0  30   1    0.69    0.56 
   0  30   2   10.18    1.02 
   0  30  -2   10.71    0.91 
   0 -30  -2   11.57    1.01 
   0 -30   2   10.27    0.99 
   0  30   3   -0.17    0.26 
   0 -30  -3    0.16    0.40 
   0 -30   3   -0.55    0.28 
  -1  30   0    0.00    0.44 
   1 -30   0    0.31    0.34 
  -1 -30   0    0.09    0.27 
   1  30   0   -0.18    0.26 
  -1  30   1    0.13    0.32 
   1  30  -1    0.13    0.31 
   1 -30   1    0.25    0.38 
  -1 -30  -1   -0.02    0.24 
   1  30   1    0.21    0.34 
  -1 -30   1    0.17    0.30 
  -1  30  -1    0.13    0.28 
   1 -30  -1   -0.12    0.24 
  -1  30   2    0.89    0.46 
   1 -30   2    0.12    0.40 
  -1 -30  -2    0.15    0.37 
   1  30  -2    0.37    0.37 
   1  30   2    0.34    0.38 
  -1  30  -2   -0.16    0.31 
   1 -30  -2    0.47    0.42 
  -1 -30   2   -0.19    0.26 
  -1  30   3    0.09    0.36 
   1 -30   3   -0.27    0.37 
  -1 -30  -3    0.34    0.39 
   1  30   3    0.06    0.33 
  -1 -30   3   -0.34    0.27 
   1 -30  -3    0.00    0.28 
   2  30   0    0.06    0.28 
  -2  30   0    0.83    0.47 
   2 -30   0    0.54    0.36 
  -2 -30   0    0.09    0.23 
   2 -30   1    3.21    0.61 
  -2  30   1    4.13    0.77 
   2  30  -1    4.72    0.80 
  -2 -30  -1    3.90    0.67 
   2  30   1    3.12    0.66 
  -2 -30   1    3.97    0.65 
   2 -30  -1    2.60    0.50 
  -2  30  -1    4.55    0.73 
   2 -30   2   -0.03    0.34 
   2  30  -2    0.06    0.31 
  -2 -30  -2    0.73    0.47 
  -2  30   2   -0.13    0.33 
   2 -30  -2    0.48    0.39 
   2  30   2    0.10    0.34 
  -2 -30   2   -0.14    0.24 
   2  30  -3    2.49    0.58 
   2 -30   3    3.71    0.82 
  -2  30   3    1.77    0.55 
  -2 -30  -3    2.67    0.67 
  -2 -30   3    2.60    0.64 
   2 -30  -3    2.98    0.70 
   2  30   3    4.82    0.91 
   3 -30   0   -0.02    0.31 
  -3  30   0    0.09    0.31 
  -3 -30   0   -0.17    0.25 
   3  30   0    0.00    0.30 
   3  30  -1    0.07    0.31 
  -3 -30  -1    0.14    0.37 
  -3  30   1   -0.13    0.36 
   3 -30   1    0.37    0.38 
   3 -30  -1    0.04    0.29 
  -3  30  -1    0.14    0.33 
   3  30   1   -0.01    0.30 
  -3 -30   1    0.09    0.27 
  -3 -30  -2    0.48    0.42 
  -3  30   2    1.00    0.46 
   3  30  -2    1.05    0.47 
   3 -30   2    0.83    0.49 
   3  30   2    0.72    0.37 
  -3 -30   2    1.10    0.35 
   3 -30  -2    1.02    0.40 
  -3  30   3   -0.34    0.30 
  -3 -30  -3   -0.33    0.36 
   3 -30   3    0.48    0.55 
   3  30  -3    0.14    0.34 
  -3 -30   3   -0.26    0.33 
   3  30   3    0.74    0.48 
   3 -30  -3    0.68    0.46 
  -4  30   0   13.26    1.12 
  -4 -30   0   13.08    1.11 
   4  30   0   13.09    1.25 
   4 -30   0   14.03    1.16 
  -4 -30  -1    0.39    0.38 
  -4  30   1    0.22    0.37 
   4  30  -1    0.89    0.46 
   4 -30   1    0.03    0.41 
   4 -30  -1    0.72    0.37 
  -4 -30   1    0.82    0.37 
  -4  30  -1    0.57    0.34 
   4  30   1    0.19    0.36 
  -4 -30  -2    6.32    0.94 
  -4  30   2    8.25    1.06 
   4  30  -2    6.71    0.90 
   4 -30   2    7.29    1.10 
   4 -30  -2    9.06    0.88 
  -4 -30   2    7.60    0.82 
   4  30   2    8.61    0.93 
   5 -30   0    0.01    0.30 
   5  30   0    0.43    0.40 
  -5  30   0    0.05    0.27 
  -5 -30   0   -0.59    0.27 
   5 -30   1    0.19    0.36 
  -5 -30  -1    0.44    0.36 
   5  30  -1   -0.20    0.32 
  -5  30   1   -0.14    0.35 
   5  30   1    0.01    0.30 
   5 -30  -1   -0.01    0.31 
  -5 -30   1   -0.10    0.24 
  -5  30   2    0.36    0.36 
  -5 -30  -2    0.09    0.36 
   5  30  -2    1.12    0.52 
   5 -30   2    0.26    0.39 
   5  30   2    0.56    0.53 
  -5 -30   2    0.28    0.34 
   5 -30  -2    0.45    0.33 
   6  30   0    0.44    0.41 
   6 -30   0    0.88    0.44 
  -6  30   0    0.12    0.35 
  -6 -30   0    0.36    0.33 
  -6 -30  -1    1.95    0.60 
  -6  30   1    1.96    0.54 
   6  30  -1    1.48    0.45 
   6 -30   1    1.49    0.52 
   6 -30  -1    1.15    0.27 
   6  30   1    1.12    0.53 
  -6 -30   1    0.94    0.39 
   0 -31   0    1.69    0.42 
   0  31   0    1.43    0.44 
   0  31  -1   60.69    2.03 
   0 -31  -1   61.27    2.04 
   0 -31   1   58.95    2.09 
   0  31   1   61.75    2.20 
   0 -31  -2    0.03    0.59 
   0 -31   2    0.31    0.33 
   0  31   2    0.18    0.30 
   0  31  -2    0.38    0.33 
   1  31   0   -0.06    0.27 
   1 -31   0   -0.02    0.24 
  -1 -31   0   -0.22    0.24 
  -1  31   0   -0.12    0.30 
   1 -31   1    0.68    0.41 
  -1 -31  -1    1.16    0.48 
  -1  31   1    1.18    0.48 
   1  31  -1    0.89    0.37 
   1 -31  -1    0.72    0.39 
  -1  31  -1    1.82    0.53 
  -1 -31   1    0.65    0.38 
   1  31   1    0.46    0.40 
   1  31  -2    0.43    0.36 
  -1  31   2    0.35    0.37 
   1 -31   2    0.39    0.41 
  -1 -31  -2    0.29    0.38 
   1  31   2    0.24    0.37 
   1 -31  -2    0.16    0.35 
  -1 -31   2    0.09    0.37 
  -1  31  -2    0.83    0.47 
  -2  31   0    0.24    0.31 
   2 -31   0    0.21    0.36 
   2  31   0    0.07    0.27 
  -2 -31   0    0.23    0.28 
   2  31  -1    0.34    0.36 
  -2  31   1    0.24    0.32 
   2 -31   1    0.12    0.40 
  -2 -31  -1    0.65    0.55 
  -2  31  -1   -0.17    0.29 
   2  31   1   -0.11    0.30 
   2 -31  -1    0.01    0.26 
  -2 -31   1   -0.20    0.24 
   2  31  -2   -0.10    0.30 
  -2 -31  -2   -0.01    0.35 
  -2  31   2   -0.02    0.33 
   2 -31   2    0.30    0.35 
   2 -31  -2    0.10    0.28 
  -2 -31   2    0.31    0.36 
   2  31   2   -0.09    0.31 
   3  31   0    0.06    0.34 
  -3  31   0   -0.01    0.30 
  -3 -31   0    0.16    0.32 
   3 -31   0    0.07    0.26 
   3 -31   1    0.50    0.27 
  -3  31   1    0.87    0.42 
  -3 -31  -1    0.46    0.39 
   3  31  -1    0.77    0.41 
   3 -31  -1    1.01    0.47 
   3  31   1    0.28    0.35 
  -3 -31   1    0.64    0.34 
  -3  31  -1    1.29    0.46 
  -3 -31  -2    0.94    0.51 
   3 -31   2    1.21    0.54 
  -3  31   2    1.81    0.54 
   3  31  -2    1.69    0.49 
   3  31   2    1.42    0.47 
  -3 -31   2    2.00    0.58 
   3 -31  -2    0.95    0.35 
   4 -31   0    2.75    0.60 
  -4  31   0    2.43    0.56 
  -4 -31   0    3.15    0.69 
   4  31   0    3.19    0.65 
   4 -31   1   52.04    1.97 
  -4  31   1   49.70    1.91 
  -4 -31  -1   52.42    2.01 
   4  31  -1   52.33    2.07 
   4  31   1   54.12    2.13 
  -4 -31   1   52.84    1.81 
   4 -31  -1   52.90    1.78 
  -4 -31  -2    3.48    0.71 
   4 -31   2    4.13    0.83 
   4  31  -2    3.52    0.71 
  -4  31   2    2.56    0.67 
   4  31   2    3.80    0.73 
   4 -31  -2    4.49    0.68 
  -4 -31   2    4.23    0.74 
  -5 -31   0   -0.03    0.29 
   5  31   0   -0.09    0.35 
   5 -31   0    0.11    0.33 
  -5  31   0    0.05    0.30 
   5  31  -1    0.23    0.35 
  -5  31   1    0.35    0.44 
   5 -31   1    0.93    0.47 
  -5 -31  -1    0.62    0.42 
  -5 -31   1    0.31    0.29 
   5 -31  -1    0.85    0.37 
   5  31   1    1.10    0.51 
   0  32   0  129.69    3.12 
   0 -32   0  136.47    3.11 
   0  32   1    0.20    0.40 
   0 -32  -1    0.64    0.37 
   0 -32   1    0.69    0.35 
   0  32  -1    0.10    0.11 
   0 -32  -2  106.60    2.72 
   0  32  -2  102.48    2.56 
   0  32   2  111.60    3.07 
   0 -32   2  105.04    2.88 
  -1 -32   0   -0.10    0.27 
  -1  32   0   -0.22    0.29 
   1 -32   0   -0.18    0.27 
   1  32   0   -0.54    0.25 
   1  32  -1    0.18    0.34 
  -1 -32  -1    0.21    0.37 
   1 -32   1    0.29    0.38 
  -1  32   1    0.46    0.34 
   1 -32  -1    0.32    0.34 
  -1 -32   1    0.11    0.34 
   1  32   1    0.49    0.38 
  -1  32  -1    0.67    0.42 
   1  32  -2    1.21    0.47 
  -1 -32  -2    2.41    0.53 
  -1  32   2    1.84    0.59 
   1 -32   2    3.06    0.70 
  -1 -32   2    1.88    0.55 
   1  32   2    2.86    0.63 
   1 -32  -2    2.17    0.53 
  -2  32   0    0.13    0.31 
   2  32   0    0.33    0.36 
  -2 -32   0   -0.17    0.23 
   2 -32   0    0.24    0.32 
   2 -32   1    0.16    0.32 
  -2 -32  -1    0.41    0.39 
  -2  32   1    0.31    0.28 
   2  32  -1    0.77    0.39 
   2  32   1    0.29    0.33 
   2 -32  -1    0.63    0.39 
  -2  32  -1    0.01    0.30 
  -2 -32   1    0.35    0.39 
  -2 -32  -2    0.33    0.39 
  -2  32   2    0.38    0.37 
   2 -32   2   -0.06    0.29 
   2  32  -2   -0.06    0.26 
   2 -32  -2    0.01    0.29 
  -2 -32   2    0.50    0.38 
   2  32   2    0.26    0.36 
   3  32   0   -0.28    0.28 
  -3 -32   0   -0.24    0.23 
  -3  32   0    0.39    0.35 
   3 -32   0   -0.13    0.28 
   3 -32   1   -0.17    0.40 
  -3  32   1    0.23    0.35 
  -3 -32  -1    0.56    0.53 
   3  32  -1   -0.13    0.28 
  -3  32  -1    0.14    0.30 
  -3 -32   1    0.11    0.27 
   3 -32  -1    0.03    0.24 
   3  32   1    0.07    0.30 
   4  32   0  101.67    2.99 
  -4  32   0  103.80    2.65 
   4 -32   0  102.92    2.66 
  -4 -32   0  102.79    2.66 
   0  33   0    1.65    0.54 
   0 -33   0    2.19    0.53 
   0 -33  -1   27.74    1.44 
   0  33   1   27.17    1.49 
   0 -33   1   27.44    1.49 
   0  33  -1   29.99    1.51 
  -1 -33   0    0.25    0.29 
  -1  33   0   -0.09    0.29 
   1  33   0   -0.01    0.28 
   1 -33   0   -0.02    0.27 
  -1 -33  -1    0.44    0.34 
   1 -33   1    0.42    0.36 
  -1  33   1   -0.08    0.32 
   1  33  -1    0.14    0.33 
  -1  33  -1    0.43    0.34 
   1 -33  -1    0.23    0.33 
  -1 -33   1    0.19    0.31 
   1  33   1    0.60    0.41 
  -2 -33   0    7.42    0.93 
   2 -33   0    5.91    0.77 
   2  33   0    6.42    0.87 
  -2  33   0    6.23    0.86 
   0   0   0    0.00    0.00 
; 
_shelx_hkl_checksum   45432 
  
